# Supplementary material for: A dual-activity topoisomerase complex regulates translation and abundance of mRNAs important for psychiatric disorders
Source: Research Square preprint supplement (doi:10.21203/rs.3.rs-1054387/v2), 2022-03-25
Supplement: Supplementary file 1 [file 055664356427aca4ba9c613a.xlsx]

## Sheet: Sheet1
Table S7. TOP3B eCLIP targets include many genes related to mental disorders.
sheet1: The gene list (left) of TOP3B eCLIP-seq targets identified by two independent replicates (WT-IP_fpkm/WT-Input_fpkm, fold change > 1.5 and WT-IP_fpkm/KO-IP_fpkm, fold change > 1.5). The gene list (right) are overlapped genes between TOP3B eCLIP-seq targets and mental disorder gene lists (Table S5)
sheet2: The normalized read counts of eCLIP-seq for each gene.
TOP3B eCLIP-seq targets
Symbol	Gene_id	Length	WT_eCLIP-seq_Input.rep1	WT_eCLIP-seq_TOP3B-IP.rep1	KO_eCLIP-seq_TOP3B-IP.rep1	WT_eCLIP-seq_Input.rep2	WT_eCLIP-seq_TOP3B-IP.rep2	KO_eCLIP-seq_TOP3B-IP.rep2	WT-IP/WT-Input.rep1	WT-IP/KO-IP.rep1	WT-IP/WT-Input.rep2	WT-IP/KO-IP.rep2			TOP3B eCLIP targets related to mental disorders
A4GALT	NM_017436	2092	2.05827	8.37313	3.27444	4.39923	10.1981	0	4.06607	2.55634	2.31762	10198.1			autism related genes (109)	schizophrenia related genes (59)
AATK	NM_001080395	5460	0.381208	1.25694	0.762366	1.8821	4.15522	1.52545	3.28861	1.64657	2.20658	2.72214			ABCA7	NISCH
ABCA2	NM_212533	8146	6.7107	25.3457	14.2908	10.4595	54.1827	23.3723	3.77635	1.77345	5.17973	2.31815			AHDC1	ZDHHC5
ABCA7	NM_019112	6814	8.43356	31.4015	5.34498	14.5913	66.7594	17.2301	3.72296	5.87385	4.57499	3.87436			ANKRD11	AMBRA1
ABCC10	NM_001198934	5043	4.18778	8.15576	3.82521	3.97609	10.9728	1.61128	1.94705	2.13155	2.759	6.80576			AP2S1	ATPAF2
ABCC3	NM_003786	5693	7.44649	11.2607	3.5271	10.504	17.0876	7.84136	1.51202	3.19173	1.62662	2.17889			BIRC6	CHRM4
ABCD1	NM_000033	3669	0.331511	1.69178	0.552508	1.10422	3.7644	0	5.08788	3.05647	3.40601	3764.4			BRD4	DOC2A
ABL1	NM_007313	5881	5.30172	19.2158	6.71293	5.26097	20.1699	9.64327	3.62377	2.86208	3.83314	2.09138			BTAF1	EP300
ABR	NM_001322841	6010	3.93463	9.98541	2.71339	4.50558	11.0915	4.07189	2.53718	3.67869	2.46118	2.72326			CACNA1H	PRR12
ABTB2	NM_145804	4905	1.40398	4.4736	2.06455	4.56288	12.3779	4.131	3.1841	2.16582	2.71214	2.99562			CASZ1	SCAF1
ACACA	NM_198834	10013	10.2571	31.222	10.0336	4.47974	11.8761	4.46125	3.04365	3.11143	2.65048	2.66147			CC2D1A	SLC45A1
ACOX3	NM_003501	2872	2.11339	4.97725	1.40878	2.15305	4.79919	1.40944	2.35398	3.5305	2.22799	3.40262			CCDC88C	SMG6
ACTR1A	NM_005736	2830	10.5707	20.4141	10.5703	4.8047	8.64152	2.81992	1.93101	1.93108	1.79818	3.06337			CD276	SREBF1
ADAMTS7	NM_014272	5520	2.27326	5.18103	2.01644	2.41355	10.4908	5.13509	2.27812	2.56812	4.34481	2.04256			CDC42BPB	TAOK2
ADAMTSL5	NM_001367197	2543	2.97639	8.92899	5.13755	7.99715	13.5177	1.41775	2.99893	1.73765	1.6901	9.52792			CDK13	FURIN
ADAT1	NM_012091	4984	1.77629	3.04253	1.41282	0.949115	8.25096	0.807719	1.7119	2.15199	8.68417	10.2025			CHD8	MAD1L1
ADCY7	NM_001114	6270	1.78061	3.26163	2.14323	1.70546	4.94208	0	1.83072	1.52112	2.8961	4942.08			CIC	PITPNM2
ADCY9	NM_001116	7979	1.88653	4.93673	2.62006	3.14165	11.0671	1.04846	2.61544	1.88349	3.5216	10.5455			CLTCL1	ARVCF
ADGRA2	NM_032777	6944	1.74474	5.61061	3.0197	3.39209	5.48606	3.35665	3.21389	1.85739	1.61684	1.6339			DEPDC5	BCL9
ADGRB2	NM_001364857	5708	2.90295	17.0045	6.14058	6.38746	37.5248	16.3822	5.85566	2.76876	5.87384	2.29045			DHX30	DGCR2
ADGRL1	NM_001008701	7835	8.91594	38.7799	19.0038	9.75378	50.5582	11.8581	4.34901	2.04053	5.18292	4.26322			DIP2A	KALRN
ADIRF	NM_006829	627	28.9237	47.5409	7.53171	19.8332	41.0503	6.02802	1.64361	6.31126	2.06967	6.80878			DIP2C	MAN2A2
AGAP3	NM_031946	3494	5.13439	20.5564	6.84549	4.02354	18.6548	10.2727	4.00289	3.00248	4.63526	1.81578			DLL1	NOTCH2
AGPAT2	NM_006412	1546	7.58591	20.3299	8.50105	10.7622	21.3843	5.23366	2.6796	2.39117	1.98681	4.08514			DMWD	RAPGEF6
AGRN	NM_001305275	7392	12.8697	71.8402	15.0597	30.128	91.592	21.3664	5.58167	4.77004	3.04	4.28652			DST	ZDHHC8
AGTRAP	NM_001040196	1259	6.11095	11.362	1.60803	5.29302	17.5287	0	1.85898	7.0614	3.31104	17528.7			DYNC1H1	ACTR1A
AHDC1	NM_001371928	6428	2.96147	17.5491	6.05013	4.41704	20.8259	13.3797	5.92383	2.90014	4.71384	1.55642			DYRK1A	MFHAS1
AHNAK	NM_024060	1036	10.2443	16.8733	5.83508	7.06271	13.3983	4.10788	1.64693	2.8912	1.89678	3.26082			DLX2	EDC4
AHNAK2	NM_138420	18335	1.37031	2.3944	1.04975	2.96194	11.1427	0.884414	1.74606	2.27874	3.76068	12.5847			EHMT1	ESRP2
AKAP13	NM_006738	13339	4.40505	9.08654	4.63269	4.57105	9.31322	4.86258	2.06229	1.96097	2.03699	1.91489			EP300	KDM3B
AKNA	NM_001317950	7454	1.55621	7.5485	1.66733	5.13973	16.1556	0	4.84745	4.52459	3.14267	16155.6			EP400	PSMB10
AKT1	NM_005163	2988	13.823	20.8253	10.8411	13.939	36.4671	20.3356	1.50646	1.92078	2.61601	1.79318			EIF4G1	PTPRF
AKT2	NM_001626	5250	7.86942	21.6822	13.3698	11.3611	30.4484	10.7004	2.75489	1.62161	2.67983	2.84528			EPPK1	RAI1
ALKBH4	NM_017621	2087	1.52729	3.14732	0.954457	0.673205	1.30054	0	2.05937	3.29405	1.929	1300.54			FAT1	SLC12A4
ALKBH6	NM_032878	977	3.3157	5.36858	2.07216	3.41041	8.47053	0	1.61865	2.58956	2.483	8470.53			GRID1	THAP11
ALOX5	NM_000698	2517	0.314974	2.59645	0	1.29597	3.21884	0	8.2173	2596.45	2.48181	3218.84			HCFC1	ATP13A1
AMBRA1	NM_001267782	5258	4.57891	7.81827	2.09858	1.97356	11.4377	1.52684	1.70708	3.72373	5.79255	7.48623			HECTD4	BAP1
ANKHD1	NM_017747	8195	7.88087	14.7902	4.30965	5.09521	8.05325	1.97095	1.87649	3.43109	1.58024	4.08391			HERC2	CLDN23
ANKHD1-EIF4EBP3	NM_020690	8349	7.95406	14.9062	4.00104	5.13112	8.59062	1.9407	1.8738	3.72465	1.67389	4.42428			HIVEP2	DPH2
ANKLE1	NM_152363	2962	1.00666	3.40803	1.25823	1.03532	3.4289	1.25875	3.38212	2.70645	3.30873	2.72189			HIVEP3	FGFR1
ANKRD11	NM_001256183	9296	6.04565	13.5468	8.69845	10.9924	70.2238	10.8777	2.24038	1.5572	6.38783	6.45515			HUWE1	HIP1R
ANKRD13D	NM_207354	2128	4.35205	8.91267	2.83811	4.00369	19.3358	7.57168	2.04746	3.13925	4.8283	2.55336			INTS1	LRP4
ANKRD16	NM_019046	2734	0.924483	2.72155	0	1.08663	5.24841	1.54137	2.94068	2721.55	4.82554	3.40282			IQGAP3	MADD
ANKRD33B	NM_001164440	9586	1.38838	5.67098	1.19304	2.091	4.43357	0.434004	4.08167	4.7494	2.1193	10.192			KANSL1	MAP3K11
ANKRD34A	NM_001039888	3607	0.448121	0.923529	0.560122	0.658534	9.15961	0	2.0563	1.64586	13.888	9159.61			KAT6A	OVOL1
ANKRD37	NM_181726	780	0.858757	1.51692	0	0.50474	5.85061	0	1.76435	1516.92	11.5684	5850.61			KCNQ2	PDCD11
ANKRD9	NM_001348652	6498	1.66671	8.93008	2.49996	4.50624	14.7608	2.50103	5.35468	3.57067	3.27492	5.89955			KDM3B	PPP1R3B
ANKS6	NM_173551	7190	5.02143	13.0219	4.23132	4.77514	17.6807	2.25765	2.59274	3.07677	3.70189	7.828			KDM6B	RPTOR
ANO8	NM_020959	4178	4.97385	10.1062	4.38845	5.9614	36.5419	8.78073	2.03145	2.30237	6.12871	4.16112			KMT2C	SEMA6C
ANXA11	NM_001278408	3072	9.696	20.5129	6.16238	12.1703	32.467	8.21999	2.11539	3.32819	2.6675	3.94929			LRBA	SNX8
AOC2	NM_009590	2677	4.081	11.9251	4.91211	3.37581	10.297	1.51202	2.92139	2.4272	3.04934	6.8056			LZTR1	SUFU
AP1G2	NM_003917	2598	6.73097	12.6097	7.26613	7.55263	18.7587	0	1.8731	1.73517	2.48341	18758.7			MBD3	SZT2
AP2A1	NM_014203	3423	10.0105	18.1247	6.65409	11.2911	28.3821	15.0503	1.81039	2.72343	2.51344	1.88569			MBD5	ZC3H7B
AP2S1	NM_001301076	918	14.8598	22.9665	11.6088	10.3714	18.981	4.64544	1.54544	1.9782	1.82995	4.08507			MBD6	FOXO3
AP3D1	NM_001261826	5065	13.7479	24.3298	14.419	15.5105	35.5251	18.1794	1.76958	1.68723	2.29024	1.95403			LMX1B	GNA12
AP4S1	NM_007077	1789	0.905231	1.59913	0	2.39458	4.62586	2.2643	1.7646	1599.13	1.931	2.04205			MED13	IQCE
APBB3	NM_006051	2158	3.00226	6.40778	3.75264	2.86742	15.3396	1.87709	2.13361	1.70708	5.34776	8.16768			MED13L	UBE3B
APEH	NM_001640	2879	8.36877	15.9058	10.2771	7.5938	17.0036	7.34381	1.90038	1.54755	2.23884	2.31504			MTHFR	RANBP10
ARAP1	NM_001040118	5137	5.28136	14.2018	2.56168	6.67154	19.3321	3.15425	2.68852	5.54176	2.89726	6.12696			MTOR	SGSM2
ARAP3	NM_022481	5258	2.30862	7.15871	2.11612	2.44239	6.29095	0	3.09952	3.38135	2.57468	6290.95			MYO1E	TMCO6
ARC	NM_015193	2950	2.19769	5.17577	0	3.71361	18.7149	0	2.35402	5175.77	5.03818	18714.9			MYO9B
ARFGEF2	NM_006420	9031	3.91258	6.03711	2.24845	2.11458	3.98284	0.89978	1.54261	2.68382	1.88262	4.42154			NAV2
ARHGAP17	NM_001006634	3493	2.94264	5.57136	2.30786	2.57735	4.71684	0	1.89268	2.41303	1.8294	4716.84			NCOR1
ARHGAP21	NM_020824	7381	0.395456	1.26401	0.141213	0.332041	5.3886	0	3.18826	8.88811	16.18	5388.6			NINL
ARHGAP26	NM_015071	9395	4.6152	7.82181	2.48	4.1069	6.46446	3.02045	1.69442	3.15269	1.57367	2.13952			NLGN2
ARHGAP33	NM_001366178	4352	2.17038	6.81524	2.32529	1.45787	9.153	1.03386	3.13866	2.92967	6.27403	8.84469			NSD1
ARHGAP35	NM_004491	9289	6.15047	19.5817	5.1252	4.87346	23.5882	6.8365	3.18325	3.81992	4.83914	3.44982			NUAK1
ARHGAP44	NM_014859	4270	1.71217	3.80833	2.14012	2.34808	5.83209	3.80629	2.22297	1.77867	2.48271	1.53182			OFD1
ARHGEF10L	NM_018125	4625	1.53179	5.2521	2.02728	2.22421	9.2075	2.70412	3.4265	2.58943	4.1378	3.40373			PER1
ARHGEF11	NM_198236	7261	3.64433	8.02903	3.52663	2.14195	4.40472	0.588017	2.20255	2.27604	2.05544	7.47808			PER2
ARHGEF19	NM_153213	3322	7.27204	16.4127	5.75674	5.12893	53.6688	21.8245	2.25664	2.85054	10.4619	2.459			PITX1
ARHGEF2	NM_001162383	4169	3.67936	7.18319	3.14672	4.89426	9.89443	0.968584	1.95176	2.28203	2.02123	10.2048			PLXNA3
ARHGEF4	NM_001367493	6735	3.54426	8.47747	3.59943	4.4266	24.1451	4.43197	2.39121	2.35457	5.45331	5.44671			POMGNT1
ARHGEF40	NM_018071	5892	0.955013	3.13273	1.19373	0.882036	4.18244	0.682363	3.27687	2.62211	4.73643	6.12037			PREX1
ARID1A	NM_006015	8595	8.06745	25.6108	10.8506	6.65497	16.3914	9.91122	3.17419	2.3601	2.46266	1.65366			PRKD2
ARID3A	NM_005224	5946	2.01739	3.7331	0.720487	2.03268	3.92676	0	1.84954	5.17417	1.93086	3926.76			PRKDC
ARRDC2	NM_015683	2501	3.23556	8.95355	1.21323	2.66238	15.4295	0	2.76638	7.37384	5.7932	15429.5			PRR12
ARSG	NM_001352901	4530	2.71485	4.15597	0.678492	1.59568	5.54856	0	1.53027	6.11629	3.47507	5548.56			PHF12
ARSJ	NM_001354210	4507	0.605862	1.22312	0	0.203502	7.0763	2.5978	2.01549	1223.12	34.6026	2.72292			RAB43
ARVCF	NM_001670	4056	5.11684	17.249	7.02281	7.66591	18.4543	2.00736	3.37037	2.45579	2.40701	9.18876			RAI1
ATG10	NM_031482	3029	1.00183	1.57303	0	1.374	3.41265	0	1.56859	1573.03	2.48192	3412.65			RPS6KA2
ATG2A	NM_015104	6318	3.2404	8.75395	1.42955	5.07886	12.5527	1.27121	2.70067	6.11928	2.47108	9.86686			SBF1
ATG9A	NM_024085	3718	6.33713	14.6715	6.98128	6.56541	16.8295	6.44694	2.3148	2.10125	2.56296	2.61006			SCN8A
ATMIN	NM_015251	4881	3.1622	5.29153	1.87223	1.8586	9.63744	0.832361	1.67284	2.82482	5.18255	11.5645			SETD1B
ATP13A1	NM_020410	3846	7.12609	14.0679	3.40573	6.65213	44.9769	9.4352	1.97386	4.12944	6.76026	4.76642			SETD5
ATP13A2	NM_022089	3996	5.51255	14.2813	6.51472	4.35938	23.2158	11.0295	2.59021	2.19181	5.32426	2.10468			SHANK2
ATP2A3	NM_174953	4854	3.23276	9.37063	4.76606	4.18989	21.4587	6.21934	2.89775	1.96571	5.12033	3.44977			SLC25A39
ATPAF2	NM_145691	1553	2.34814	3.99398	0.652187	1.84013	3.55485	0	1.70019	6.1146	1.9308	3554.85			SLC38A10
B4GALNT4	NM_178537	3750	5.86178	21.1218	8.4992	9.78451	42.3291	9.38238	3.60269	2.48486	4.32569	4.51107			SLC45A1
BABAM2	NM_001329114	2136	2.08532	3.79492	1.89565	1.55991	5.16587	1.8964	1.81895	2.00086	3.30952	2.72261			SLC6A8
BAHCC1	NM_001291324	10819	4.68687	20.2517	6.39093	3.87026	12.6661	2.71242	4.32003	3.16833	3.27184	4.66795			SLC7A5
BAHD1	NM_014952	4779	4.06074	10.9149	4.85501	4.25456	9.62225	0.883098	2.68726	2.24772	2.2611	10.8837			SMG6
BAMBI	NM_012342	1691	4.46264	11.6165	4.11018	7.7308	12.8008	2.34965	2.60246	2.82558	1.65561	5.44567			SND1
BANF1	NM_003860	731	0.702966	4.34597	0.878659	1.23955	4.78917	0	6.17355	4.94052	3.86052	4789.17			SPEN
BANP	NM_001173543	2438	1.66086	2.93366	1.24554	2.14764	4.52594	1.66154	1.76529	2.35345	2.10642	2.72231			SRCAP
BAP1	NM_004656	3599	4.37639	12.4972	7.38484	5.53031	15.6526	7.66166	2.85494	1.69205	2.82981	2.0427			SYNJ1
BCAM	NM_005581	2409	12.3807	28.1859	17.745	22.1213	49.4812	13.2111	2.27641	1.5883	2.23671	3.74514			TANC2
BCAS3	NM_001353144	3652	2.81873	5.36187	2.98128	2.03903	9.60146	1.08453	1.90155	1.79791	4.70653	8.84499			TAOK2
BCL2L11	NM_138621	5098	1.68249	5.28337	1.40198	5.93345	11.4622	5.61049	3.13835	3.76583	1.93146	2.04263			TOP3B
BCL2L13	NM_001270726	4961	3.34649	5.38236	1.02022	2.68647	6.11655	0	1.60788	5.27053	2.27595	6116.55			TRAF7
BCL7A	NM_020993	3785	2.24781	6.55426	2.40824	2.01312	20.0531	5.35403	2.91454	2.72047	9.95626	3.74472			TRAPPC9
BCL9	NM_004326	6187	4.18532	8.39371	3.92351	2.15239	5.34607	2.61683	2.00503	2.13879	2.48263	2.04217			TRIO
BCR	NM_004327	6783	2.39673	8.15702	2.19203	4.67266	11.9471	2.92396	3.40197	3.71952	2.55626	4.08453			TRRAP
BICRA	NM_015711	5739	2.25782	6.14834	2.29298	3.7323	7.21006	1.41166	2.72192	2.6802	1.93128	5.1039			TSC2
BIRC6	NM_016252	15702	5.54452	14.2423	5.09301	3.18289	8.60845	3.61172	2.56825	2.79588	2.70375	2.38282			UBE3C
BMP4	NM_001347912	1735	36.8757	146.484	55.428	19.4788	60.4185	30.3523	3.97227	2.64273	3.1016	1.99051			USP7
BMP8B	NM_001720	4826	2.35128	3.75766	1.8893	1.77684	8.58123	2.5202	1.59746	1.98786	4.82676	3.40363			WDFY3
BRAT1	NM_001350626	2959	7.10183	18.0695	2.21914	6.55928	18.1429	3.80595	2.54398	8.13887	2.76556	4.76573			ZC3H11A
BRD2	NM_001199455	4602	15.6183	50.7705	21.4468	16.4975	49.7527	13.2036	3.25051	2.36716	3.01559	3.76784			ZFYVE26
BRD4	NM_058243	5198	5.60889	12.5062	7.01081	7.44789	18.0438	10.9103	2.22931	1.78359	2.42234	1.65367			ZNF827
BTAF1	NR_165093	8848	5.86857	9.82378	2.58879	2.97581	7.05519	0	1.67368	3.79327	2.37005	7055.19
BTBD7	NM_001002860	8445	3.1438	5.77731	2.85783	1.11984	3.24499	0.476505	1.8371	2.02086	2.89513	6.79572
BTN3A2	NM_001197247	4068	0.285546	1.5132	0	0.503499	0.972665	0.475605	5.28083	1513.2	1.92798	2.04082
C15orf39	NM_015492	4425	2.83553	10.9863	3.88717	5.48353	11.2163	1.83002	3.87314	2.82556	2.04508	6.12571
C19orf44	NM_032207	3346	1.99763	4.01275	2.64382	1.3813	4.80309	1.17548	2.00775	1.51721	3.47471	4.0826
C19orf47	NM_001256440	2104	5.00388	11.3314	7.21686	2.48852	13.1111	3.85059	2.26406	1.56991	5.26651	3.40406
C19orf54	NM_001353809	2398	2.28682	5.19336	2.45	1.53604	4.45109	0	2.27	2.11887	2.89588	4451.09
C1orf50	NM_024097	4759	1.99466	3.28846	0	0.937874	2.71777	0	1.6478	3288.46	2.89471	2717.77
C2CD2	NM_015500	6473	2.99853	4.73286	1.59488	2.84983	8.25789	0.638201	1.57787	2.96568	2.89666	12.9191
C2CD2L	NM_014807	4810	2.99149	5.918	0.299039	3.65712	10.5974	4.78824	1.97762	19.7241	2.89695	2.21275
C2CD3	NM_001286577	7960	2.03478	5.93024	0.762943	1.19583	4.15862	0.508899	2.91301	7.76267	3.4747	8.15576
C3orf18	NM_001171740	2568	1.68156	3.16826	1.26111	0.79065	2.29116	0	1.88301	2.51029	2.89416	2291.16
C6orf132	NM_001164446	6385	2.64268	5.30431	1.80174	3.38887	9.41075	0	2.00641	2.94237	2.77614	9410.75
C8orf58	NM_001013842	2056	0.982321	1.85077	0	0.69284	4.01535	0	1.88217	1850.77	5.78714	4015.35
CABIN1	NM_012295	7233	4.48553	9.63949	4.48536	3.49318	7.25738	1.68272	2.14854	2.14862	2.07699	4.31033
CABLES1	NM_001100619	5005	1.21351	3.14388	2.02255	1.80684	5.51164	1.61862	2.58861	1.55364	3.04874	3.40304
CACFD1	NM_001242369	2880	1.68715	6.62261	2.46038	3.47077	5.74703	0	3.92299	2.69061	1.65536	5747.03
CACNA1H	NM_021098	8218	5.35701	41.0327	6.75861	10.9465	57.982	7.01176	7.65819	6.07027	5.29639	8.26807
CAMSAP1	NM_015447	8018	4.13893	8.62296	3.71434	4.74061	15.5443	9.55515	2.08288	2.32091	3.27828	1.62663
CANT1	NM_138793	3482	10.1948	29.5404	14.6045	12.792	42.1396	8.02147	2.8973	2.02256	3.29396	5.2527
CARD10	NM_014550	4111	4.67347	12.2906	6.23103	6.22615	17.6877	3.1168	2.62931	1.97217	2.84042	5.67314
CASKIN1	NM_020764	5839	2.20414	7.2005	3.73269	3.84471	9.68772	1.42259	3.26533	1.92852	2.5191	6.80512
CASZ1	NM_001079843	7932	1.93259	4.13222	1.52565	3.10873	7.96876	4.07016	2.13708	2.70672	2.56253	1.95737
CBLC	NM_012116	1576	14.5073	32.3679	12.0889	15.8566	41.6128	2.54609	2.231	2.67726	2.62416	16.3374
CBX2	NM_005189	4628	5.41171	11.18	5.69629	4.12938	10.9954	0.949756	2.0655	1.96233	2.66209	11.5649
CC2D1A	NM_017721	3581	4.11603	9.56271	3.3372	6.4076	11.3677	2.22574	2.32272	2.86463	1.77382	5.1051
CCDC142	NM_001365575	4128	2.14638	4.61547	1.86634	1.42612	2.54306	0	2.14935	2.47168	1.78195	2543.06
CCDC3	NM_031455	2747	1.62677	4.17963	2.21822	2.08611	9.06762	2.95898	2.5677	1.88338	4.34458	3.06341
CCDC34	NM_030771	1452	1.36514	2.89369	1.36517	0.320946	13.0209	0	2.11815	2.1181	40.4444	13020.9
CCDC71L	NM_175884	6798	1.24556	2.8635	0.889619	1.11554	3.23252	1.18669	2.29712	3.21518	2.89513	2.72167
CCDC88C	NM_001080414	7519	2.14732	4.4882	0.939344	1.38824	4.75427	0	2.08917	4.77293	3.42222	4754.27
CCND3	NM_001760	2024	3.68996	6.86084	3.39857	2.73954	19.8459	1.94284	1.85882	2.01815	7.24161	10.2096
CCNE1	NM_001238	1954	3.72634	7.06951	3.10519	2.19013	19.7444	0	1.89666	2.27595	9.01107	19744.4
CD276	NM_001024736	3292	6.19126	14.8614	6.84583	7.55767	28.3888	3.57323	2.4	2.17055	3.7558	7.94263
CD2BP2	NM_001243646	3498	5.20809	15.3321	6.8058	4.73069	12.9018	3.55233	2.94333	2.25246	2.72669	3.63092
CDC14B	NM_033331	5602	1.52008	4.60287	2.3524	2.46757	9.36948	2.89655	3.02605	1.95584	3.79551	3.23359
CDC42BPA	NM_001366019	10912	5.20326	8.48717	4.04684	4.34945	6.56426	0.385551	1.63081	2.09672	1.50887	16.9816
CDC42BPB	NM_006035	6844	9.48729	25.1187	9.36598	8.52401	24.7	3.62709	2.64733	2.68162	2.89736	6.808
CDK12	NM_016507	8287	4.93756	7.71393	4.52182	3.16063	4.99557	2.44524	1.56198	1.70556	1.58006	2.04215
CDK13	NM_003718	9525	3.30909	6.1526	2.9026	3.34391	5.14137	2.32307	1.85874	2.11896	1.53707	2.21223
CDK5R1	NM_003885	3948	1.57597	3.58797	0.787978	1.60553	6.44191	3.67872	2.27523	4.54761	4.00982	1.75065
CDK9	NM_001261	2476	7.53511	15.2384	8.19001	5.58411	8.92744	1.63869	2.02205	1.86038	1.59844	5.44457
CDPF1	NM_207327	1489	1.62838	2.87628	0.678376	0.797511	3.69774	0	1.76526	4.23371	4.6308	3697.74
CDR2L	NM_014603	3533	4.46993	9.58238	4.87081	7.00585	10.9312	0	2.14326	1.9669	1.56008	10931.2
CEBPB	NM_005194	1839	11.3281	34.1399	6.23979	29.0021	69.3242	26.8905	3.01347	5.47045	2.39023	2.57793
CELSR1	NM_014246	11839	3.91097	11.4925	3.6442	5.60039	19.1349	2.48974	2.93779	3.15279	3.41611	7.68242
CELSR2	NM_001408	11015	2.88132	13.8433	2.59306	3.61281	13.8714	8.07096	4.80284	5.33655	3.83844	1.71847
CELSR3	NM_001407	11933	1.28635	8.84931	1.18474	2.06918	23.5224	8.80475	6.87403	7.46314	11.3625	2.67125
CENPV	NM_181716	1131	6.26182	11.0604	3.47864	3.68026	68.7275	0	1.76604	3.17861	18.6696	68727.5
CEP131	NM_001319228	3639	4.30778	8.19419	3.31355	4.9339	7.52477	0	1.90174	2.47219	1.52481	7524.77
CEP170B	NM_001112726	6727	5.13338	25.9571	6.49188	8.30598	38.2622	9.66646	5.05555	3.99778	4.60603	3.95783
CEP192	NM_032142	7960	3.32529	5.70915	2.41135	1.31291	2.42102	0	1.71637	2.36663	1.84261	2421.02
CFAP43	NM_025145	5367	0.602046	1.32936	0.188053	0.707731	11.7931	0.752828	2.20442	7.03168	16.6398	15.6443
CFL1	NM_005507	1245	41.3952	71.6949	31.8102	17.7978	39.5023	22.5585	1.73192	2.25376	2.21938	1.75103
CHCHD5	NM_001304354	547	1.74788	4.80257	0	1.36977	19.8459	0	2.74609	4802.57	14.4779	19845.9
CHD5	NM_015557	9850	1.46665	3.01008	1.30945	2.36443	5.70948	0.419191	2.05095	2.29698	2.41372	13.5878
CHD8	NM_001170629	8467	4.03453	11.4138	5.04294	2.54479	5.69814	1.47658	2.82832	2.26286	2.23826	3.85639
CHMP6	NM_024591	1664	2.67677	8.31004	4.25843	3.71865	11.6046	2.43437	3.10335	1.95098	3.1198	4.76501
CHPF	NM_024536	3028	14.8921	46.232	26.7371	30.2372	94.074	50.111	3.10425	1.72907	3.1111	1.87727
CHRM4	NM_001366692	2846	0.668535	1.04962	0.557007	2.09575	16.7003	2.22941	1.56769	1.88102	7.96484	7.48752
CHST15	NM_015892	4762	8.55246	18.7461	7.83236	8.16219	16.1522	2.54131	2.19163	2.39311	1.97867	6.35336
CHSY1	NM_014918	4662	3.73779	6.49743	2.2248	3.34756	7.27533	2.67089	1.73784	2.91915	2.17268	2.72291
CHURC1-FNTB	NM_001202559	2894	2.51852	5.2724	0.699374	1.31575	8.57884	0	2.09262	7.52798	6.51514	8578.84
CIC	NM_001304815	8227	3.74067	18.373	5.66006	5.0336	12.4063	7.38576	4.91036	3.2455	2.46421	1.67953
CIT	NM_001206999	8736	2.79007	4.92812	1.16247	1.14787	3.80138	0	1.76567	4.23571	3.3088	3801.38
CLASP2	NM_001365628	7245	2.43727	3.73772	0.283349	0.799482	3.86136	1.13402	1.53294	13.1448	4.8238	3.40203
CLCN7	NM_001287	4168	5.07842	14.2168	5.9884	5.51907	13.0553	3.83419	2.7989	2.37366	2.36505	3.40407
CLDN23	NM_194284	2160	1.03719	2.19841	0.518589	0.975392	9.89242	0	2.11754	4.23106	10.1316	9892.42
CLDN3	NM_001306	1274	2.86054	7.85979	3.17822	7.84606	95.2728	0	2.74669	2.47224	12.1412	95272.8
CLDN4	NM_001305	1831	21.8942	74.7404	30.4074	42.3743	75.3299	22.1238	3.41355	2.45789	1.77768	3.40478
CLDN7	NM_001307	1542	18.745	37.2633	18.6435	40.2785	64.5361	34.278	1.9878	1.99863	1.60221	1.88267
CLN3	NM_000086	1877	2.80449	6.85893	0.53924	1.77509	20.5754	2.15812	2.44483	12.6961	11.5846	9.52953
CLTCL1	NM_007098	5517	1.39525	2.16188	0.550662	1.55371	11.5065	7.34651	1.54835	3.91885	7.40109	1.56605
CNPPD1	NM_015680	2019	5.43266	16.4502	8.24573	6.15804	11.8961	1.94098	3.02746	1.99475	1.93148	6.12577
CNPY3-GNMT	NM_001318857	970	2.14732	4.33473	0.766865	2.34392	6.2694	0	2.01773	5.64517	2.67361	6269.4
CNTROB	NM_001037144	4062	4.54651	12.3023	6.77107	3.86617	7.9079	0	2.70528	1.81662	2.04488	7907.9
COBL	NM_001287436	5383	2.10627	7.35215	1.50443	3.97916	9.22425	3.01007	3.48895	4.88377	2.31756	3.06345
COL1A1	NM_000088	5914	2.73274	15.366	4.26973	9.47655	43.2846	4.10075	5.62085	3.59797	4.56707	10.5527
COL4A5	NM_033380	6518	2.9847	5.56492	1.7099	2.63136	5.08328	0.622004	1.86386	3.25263	1.93107	8.1593
COMTD1	NM_144589	1250	3.01286	4.96691	3.01266	1.77079	28.7352	3.01401	1.64803	1.64813	16.2182	9.53072
COQ4	NM_016035	1245	1.79842	3.02549	1.28453	2.11414	8.75178	0	1.68137	2.3535	4.13768	8751.78
CORO1B	NM_001018070	1932	8.26819	13.481	7.41992	6.4795	20.2199	6.36256	1.63027	1.81662	3.12011	3.17745
COX6A1	NM_004373	537	2.12374	4.16803	0	1.66429	4.82269	0	1.96166	4168.03	2.896	4822.69
CPSF1	NM_013291	4480	10.4521	23.7141	8.33434	7.83796	20.2566	6.30974	2.26861	2.845	2.58409	3.20985
CPTP	NM_001029885	2154	3.32359	7.17521	4.61596	2.82165	10.0632	3.6943	2.15822	1.5541	3.56517	2.72325
CPVL	NM_001371264	3162	0.310479	0.731263	0	0.36496	1.05772	0	2.34771	731.263	2.89026	1057.72
CRAMP1	NM_020825	7972	3.74686	8.82438	5.27703	3.3499	5.39275	2.11174	2.35451	1.67191	1.60935	2.55249
CREB3	NM_006368	1496	2.4064	5.92489	2.73439	1.80006	5.96125	0	2.46111	2.16601	3.30986	5961.25
CRYBG2	NM_001039775	5245	0.849174	2.63634	1.15797	0.725979	4.20751	0	3.10094	2.27472	5.78767	4207.51
CSAD	NM_015989	2695	2.85478	4.60015	0.37553	3.70902	9.21228	0	1.61082	12.2172	2.48308	9212.28
CSNK1G2	NM_001319	2894	10.4579	35.3845	16.3835	17.7023	40.8467	16.7391	3.38319	2.15963	2.30729	2.44006
CSPG4	NM_001897	8290	2.49112	5.75184	1.46532	2.87085	12.6448	7.32962	2.30801	3.92265	4.40303	1.72493
CTC1	NM_025099	7039	3.83625	9.50687	3.14891	3.49997	10.5319	2.29116	2.47752	3.01814	3.00827	4.59474
CTDNEP1	NM_001143775	1767	2.95731	14.5547	6.44504	7.22015	24.0213	8.723	4.91995	2.25794	3.32652	2.75348
CTDP1	NM_004715	3744	2.15783	6.86084	2.4275	4.81952	7.35031	1.07927	3.17803	2.82513	1.5248	6.80417
CTDSP2	NM_005730	4785	5.64646	15.8151	6.92325	5.02543	10.7156	3.22776	2.8004	2.28402	2.13185	3.31879
CTSZ	NM_001336	1502	6.47884	12.3975	6.74858	8.88525	14.7123	8.10169	1.91324	1.83678	1.65563	1.81573
CUL9	NM_015089	7759	3.12642	7.73134	4.95007	3.67515	9.22955	0.52122	2.47212	1.56155	2.51066	17.6737
CYB561D2	NM_007022	1204	2.06743	4.8691	1.47662	2.08312	10.0605	5.90931	2.35401	3.29523	4.8272	1.70219
CYB5R2	NM_001302826	1717	0.298606	1.05488	0	2.4572	4.06865	0	3.52089	1054.88	1.65513	4068.65
CYREN	NM_001363329	1752	6.00638	14.4403	3.12815	4.70696	8.52465	2.50359	2.40377	4.61479	1.81069	3.40361
CYTH1	NM_001365040	3427	4.94112	10.9272	5.7242	9.49159	32.8402	10.8505	2.21105	1.90862	3.45956	3.02632
CYTH3	NM_004227	4480	3.53527	7.3653	4.30561	4.47543	17.9088	8.16156	2.08279	1.71023	4.00069	2.19402
CYTH4	NM_013385	3077	0.883266	1.93163	0	1.18663	7.73672	1.26228	2.18445	1931.63	6.51441	6.1243
D2HGDH	NM_152783	2566	5.25075	16.0034	9.65187	7.98774	19.9897	12.3596	3.04725	1.65789	2.50223	1.61721
DAB2IP	NM_032552	5471	4.14478	9.84853	3.33051	4.26317	15.6308	6.6638	2.37556	2.95618	3.6656	2.34527
DACT1	NM_016651	3938	0.419456	1.11144	0	0	0.714409	0	2.64342	1111.44	714.409	714.409
DCTN1	NM_004082	4500	7.55869	13.775	5.39886	5.18302	11.6473	7.20149	1.82216	2.55099	2.24677	1.61712
DDX56	NM_019082	2872	5.21674	13.6142	5.63941	5.13784	14.4076	2.82089	2.60921	2.41368	2.80367	5.10565
DEF6	NM_022047	2296	2.82179	4.56879	2.64532	5.39017	15.619	0	1.61854	1.72647	2.89715	15619
DENND1A	NM_001352964	5224	3.17806	6.11552	2.71281	2.64238	7.39277	0.775393	1.92369	2.25348	2.79671	9.52194
DENND5A	NM_015213	4990	4.40319	9.12171	2.03836	5.55936	14.4428	7.34146	2.07114	4.47283	2.59746	1.96703
DEPDC5	NM_001242896	6554	2.18836	4.29485	0.91177	2.31523	3.47861	1.45949	1.96169	4.70529	1.50184	2.38182
DGCR2	NM_005137	4438	6.00528	29.2435	11.7393	9.66006	51.6772	10.8408	4.86881	2.49087	5.34902	4.76646
DGKQ	NM_001347	4649	4.36061	13.5562	5.88665	7.68883	33.2717	21.8117	3.10806	2.30247	4.32671	1.52534
DHX30	NM_138615	3855	8.22349	15.167	4.95365	6.05622	12.8243	0.99115	1.84412	3.06116	2.11719	12.9257
DHX34	NM_014681	4338	4.53828	11.4516	2.77846	4.24602	8.8335	0	2.52277	4.12007	2.07993	8833.5
DIAPH2	NM_006729	9202	1.70649	2.87066	1.01572	1.52838	3.32148	1.62575	1.68122	2.82346	2.17178	2.04179
DIP2A	NM_001353942	7293	3.91436	10.0687	2.77604	3.45916	16.2648	3.33263	2.57159	3.62571	4.70058	4.879
DIP2C	NM_014974	7885	2.87182	7.5485	0.769173	2.10991	13.9746	3.07811	2.62755	9.80105	6.62016	4.53851
DIRAS1	NM_145173	3378	5.12422	12.8398	5.36229	7.14409	13.8009	4.76851	2.50523	2.39402	1.93152	2.89357
DISP2	NM_033510	12610	1.20723	2.84329	1.00603	0.599118	5.48317	0.805158	2.35327	2.82345	9.13681	6.80161
DLL1	NM_005618	3779	0.611544	3.02513	0.305731	1.58181	11.6677	2.44759	4.93863	9.86249	7.37151	4.76507
DLX2	NM_004405	2454	1.58174	2.89731	1.09832	2.37582	11.973	1.75817	1.83057	2.63554	5.03739	6.80604
DMWD	NM_004943	3410	5.99807	19.3152	8.87427	11.6553	31.6886	13.4702	3.21971	2.1763	2.71858	2.35232
DNAJC14	NM_032364	3330	4.37757	16.0375	9.72766	2.85881	24.852	3.64937	3.66272	1.64848	8.69012	6.80808
DNMBP	NM_015221	6428	9.18012	20.7316	6.91621	6.726	17.5623	2.51605	2.25807	2.99711	2.61073	6.97736
DOC2A	NM_001282062	2105	4.11594	7.61621	1.46982	2.99508	24.0341	3.92141	1.84997	5.17823	8.02183	6.12738
DOCK3	NM_004947	9069	1.295	4.24807	1.15624	1.90283	4.09606	2.31344	3.27782	3.67087	2.15148	1.76978
DOCK6	NM_001367830	6535	4.49215	21.3828	3.9542	6.17308	19.8273	6.32947	4.75897	5.40625	3.21138	3.13204
DOCK9	NM_001366682	7667	2.15325	4.69089	1.07652	1.70852	9.90181	3.76975	2.1775	4.35342	5.79214	2.62595
DOK4	NM_001369620	2817	2.78015	5.23795	3.12757	2.12421	6.62891	4.17184	1.88338	1.67423	3.11917	1.58858
DOT1L	NM_032482	7652	4.46535	14.6203	6.26206	7.61745	14.4681	4.90286	3.27343	2.33437	1.89908	2.95034
DPH2	NM_001384	2466	2.75683	5.72882	2.83764	4.38441	9.94282	1.62229	2.07729	2.01815	2.26725	6.12511
DST	NM_001374736	24709	9.47007	20.6686	10.4659	6.02659	14.1841	4.25532	2.18229	1.97466	2.3532	3.33248
DTX2	NM_001102595	2534	1.35013	2.47335	0.750021	1.23451	6.13243	0	1.83058	3.29332	4.96346	6132.43
DUS1L	NM_022156	2233	15.905	37.711	12.3581	18.4436	60.0328	25.8017	2.37087	3.05127	3.25476	2.32661
DUSP16	NM_030640	6661	2.95095	4.91026	2.24522	1.88516	5.24444	1.28353	1.6634	2.18601	2.78048	4.08277
DUSP5	NM_004419	2475	14.9767	42.8165	8.60927	34.4571	68.7462	32.0479	2.85868	4.97272	1.99507	2.14504
DVL1	NM_001330311	3305	12.8271	26.8703	10.8013	18.7287	41.3925	22.9625	2.09465	2.48746	2.20999	1.80253
DYNC1H1	NM_001376	19940	16.7168	38.3391	13.5537	10.29	20.7759	8.19209	2.29331	2.82848	2.01885	2.53578
DYRK1A	NM_001396	5475	4.28955	9.05753	3.88267	1.82568	5.03848	2.21965	2.11104	2.33221	2.75828	2.26892
DYSF	NM_001130987	6775	0.0597042	0.492857	0	0.808314	3.25879	0	8.11899	492.857	4.02661	3258.79
ECE1	NM_001397	5067	5.08546	11.2283	7.1511	7.28563	22.1942	0.794775	2.20749	1.56993	3.04588	27.8901
EDC4	NM_014329	4765	3.78749	10.2085	2.94575	4.6501	10.8944	2.52595	2.69461	3.46433	2.34232	4.31128
EFNA2	NM_001405	2423	2.64649	8.01389	2.83545	3.33325	15.4542	1.89114	3.02697	2.82532	4.63498	8.1676
EHBP1L1	NM_001099409	5170	8.74684	27.4969	17.5711	18.6359	46.2867	15.6253	3.14328	1.56481	2.48361	2.96211
EHMT1	NM_024757	5094	6.34315	16.8062	3.96423	4.28741	25.3873	11.1048	2.64908	4.23838	5.91999	2.28596
EIF2B3	NM_020365	1900	1.39838	2.58748	0	1.17408	12.2482	0	1.84901	2587.48	10.4233	12248.2
EIF4ENIF1	NM_019843	3647	2.53285	4.02	1.92703	1.68283	9.00267	4.4067	1.58652	2.08503	5.34654	2.04249
EIF4G1	NM_001194946	5426	27.1075	65.5618	21.7363	20.7851	39.8207	18.2734	2.4185	3.01609	1.91573	2.17904
EIF6	NM_002212	1069	12.2823	28.4741	9.5951	7.67007	23.5329	3.83966	2.31812	2.96726	3.06775	6.12732
ELAC2	NM_018127	3767	5.10955	8.02232	2.92717	3.75391	9.42732	1.06487	1.56976	2.7397	2.51067	8.84473
ELL	NM_006532	3970	3.21767	6.74925	4.27331	4.01879	6.16519	3.01775	2.09691	1.57903	1.53371	2.0423
ELP6	NM_001031703	1352	3.00166	6.36236	0.750367	3.52851	12.2694	0	2.11891	8.46771	3.47623	12269.4
EMID1	NM_133455	2128	1.15032	4.51539	0.479248	2.7045	5.22453	0	3.92191	9.40222	1.93108	5224.53
EML2	NM_001193268	2974	4.8575	12.3934	1.68648	9.67531	25.7381	10.7987	2.55087	7.34432	2.65991	2.38323
EML3	NM_001300793	3159	5.65977	16.5102	9.32537	6.80424	18.4022	5.14721	2.9166	1.77027	2.70412	3.57449
ENDOG	NM_004435	1145	1.76823	4.99728	0	2.49428	7.2277	0	2.82455	4997.28	2.89655	7227.7
ENGASE	NM_001042573	4603	8.83029	23.9793	10.8121	9.10897	27.0088	8.11249	2.71527	2.21761	2.96475	3.32887
ENTPD2	NM_203468	2102	5.20614	21.7978	8.19463	13.3732	24.9586	7.71593	4.18614	2.65969	1.86617	3.23426
EP300	NM_001429	8779	5.22285	16.4911	6.4703	4.29215	7.87173	3.23662	3.15688	2.54834	1.83356	2.43133
EP400	NM_015409	12289	4.56975	13.5882	3.94485	4.05777	12.0941	4.93325	2.97287	3.44368	2.97975	2.45105
EPHB4	NM_004444	4353	8.09679	27.0688	11.5165	7.87671	18.3863	4.65506	3.34274	2.35024	2.33396	3.94889
EPN3	NM_017957	3879	2.88717	6.25322	1.80439	2.30297	4.9172	1.0315	2.16511	3.46364	2.13423	4.7624
EPOP	NM_001130677	3252	5.51772	16.3914	6.89683	11.6456	25.6294	15.0543	2.97014	2.37631	2.20059	1.70235
EPPK1	NM_031308	16004	2.40318	9.32385	2.24499	4.43076	14.1315	0.759196	3.87819	4.15134	3.18869	18.5893
EPS15L1	NM_001258374	3214	2.35925	6.14127	1.86242	3.35719	7.61335	1.24221	2.60196	3.2957	2.2671	6.12396
ERBB2	NM_004448	4647	5.92539	18.8802	6.75296	5.01908	12.4661	1.74342	3.18579	2.79543	2.48325	7.14625
ERCC2	NM_000400	4108	6.14962	15.2258	6.70127	5.37535	12.8906	0	2.47549	2.27174	2.39764	12890.6
ESPL1	NM_012291	6617	2.87352	10.5833	4.891	0.790504	2.49908	0.611621	3.68177	2.16339	3.15738	4.07932
ESRP2	NM_001365264	3459	5.03517	7.94509	2.26575	3.90646	8.2325	4.02966	1.57761	3.50505	2.10687	2.04247
ESYT1	NM_001184796	4277	5.01787	12.8209	5.207	4.3404	16.7694	0.947126	2.55454	2.46177	3.86268	17.6869
EVI5L	NM_001159944	3903	4.22814	6.51084	1.89715	5.09769	14.7715	2.16912	1.53952	3.43011	2.89712	6.80676
EXOSC6	NM_058219	5163	1.19095	7.85362	1.78639	15.1199	63.2851	0	6.58891	4.3939	4.18528	63285.1
EXOSC8	NM_181503	1166	1.71938	3.37458	0.716333	1.17904	1.9522	0	1.96153	4.70434	1.65435	1952.2
EXTL3	NM_001440	8218	7.15323	29.0309	8.9413	8.85919	30.0224	7.02831	4.05786	3.24647	3.38846	4.27103
FAAP100	NR_033338	3793	7.09429	18.5353	9.42182	7.81818	13.5927	8.87127	2.61234	1.96707	1.73839	1.53205
FAM110A	NM_001289146	1804	3.34649	10.3444	6.79738	4.67142	11.399	6.27714	3.09019	1.52159	2.43965	1.81567
FAM160A2	NM_032127	3406	3.9426	8.8756	2.89879	3.61223	21.3292	10.4403	2.25063	3.06077	5.90309	2.04277
FAM189B	NM_006589	3190	6.85462	23.1687	13.6453	9.54976	25.9427	5.07944	3.37952	1.6978	2.7163	5.10639
FAM193B	NM_001190946	2968	4.60452	14.0337	4.40126	4.29828	14.7616	6.774	3.04715	3.18784	3.43351	2.17884
FAM20C	NM_020223	3176	1.89349	15.6083	3.64131	4.45171	22.8227	1.45713	8.23882	4.28529	5.12558	15.652
FAM83F	NM_138435	15561	2.34627	10.1305	5.37671	3.90726	34.6321	3.91192	4.31587	1.8838	8.86124	8.85069
FAM83H	NM_198488	5632	10.8522	39.3594	17.182	13.1819	74.9159	35.464	3.62653	2.29061	5.6828	2.11239
FAM89A	NM_198552	1503	3.2437	6.36617	3.37873	5.40177	20.2566	8.11249	1.96202	1.88363	3.74929	2.49665
FANCA	NM_000135	5452	10.1548	33.1676	14.6386	6.01199	24.7429	3.70752	3.26588	2.26561	4.1149	6.6719
FANCI	NM_001376911	4744	4.34857	7.22923	4.26316	1.90436	4.06607	0	1.66206	1.69535	2.13401	4066.07
FASN	NM_004104	8464	49.1205	150.355	58.1666	45.1347	102.737	24.4259	3.06088	2.58486	2.27619	4.20592
FAT1	NM_005245	14776	44.4866	177.535	65.6851	25.9857	103.512	26.0655	3.99066	2.70278	3.98327	3.97108
FBRS	NM_001105079	5196	5.52001	16.7532	7.39257	10.66	19.1382	7.88863	3.03443	2.26591	1.79515	2.42573
FBRSL1	NM_001142641	4967	8.63829	30.621	8.68241	12.1433	29.7273	10.6906	3.5444	3.52638	2.44784	2.78043
FBXL12	NM_017703	1873	1.70496	4.26629	1.59834	2.00414	10.1631	2.13202	2.50081	2.66754	5.06854	4.76468
FBXL14	NM_152441	2527	0.575416	4.96918	1.91803	2.2548	18.2947	11.5136	8.62082	2.58943	8.11006	1.58883
FBXL19	NM_001099784	3796	4.90686	25.4995	13.0669	4.89032	41.4223	10.6714	5.19565	1.9513	8.46853	3.88126
FBXO46	NM_001329634	2969	6.29744	11.7213	6.77107	4.45748	22.1424	1.35476	1.86099	1.73083	4.96636	16.3321
FEM1A	NM_018708	9540	1.26405	2.10867	1.05333	1.11444	2.15287	0	1.66687	2.00001	1.93006	2152.87
FGFR1	NM_001174067	5375	5.34887	13.7503	6.02659	4.95922	10.7777	3.76822	2.57022	2.28123	2.17282	2.85939
FGFR2	NM_022970	4643	2.09312	3.4917	1.96222	2.25538	4.15893	1.74488	1.66738	1.77856	1.84319	2.38215
FGFRL1	NM_021923	3088	7.7367	27.4854	10.8178	13.4105	30.373	17.0535	3.55214	2.54052	2.2647	1.78094
FLCN	NM_001353229	3928	2.35721	4.94806	2.56202	2.04801	13.9639	1.02527	2.09822	1.93055	6.81495	13.6064
FLII	NM_002018	4179	8.27149	13.1327	6.97009	5.57163	12.0296	3.71894	1.58752	1.88389	2.15869	3.23382
FLNA	NM_001110556	8507	23.1254	63.0075	28.291	21.3947	50.7306	18.0884	2.72448	2.22705	2.37107	2.80444
FLNC	NM_001458	9138	3.76654	8.47937	1.53235	9.66261	21.4335	1.77319	2.25064	5.52998	2.21796	12.0807
FNTB	NM_002028	2711	1.29272	5.41273	0.358917	1.35079	7.82851	0	4.18386	15.0388	5.79122	7828.51
FOCAD	NM_017794	6096	4.1184	7.50907	1.32837	3.04523	5.88274	0	1.82285	5.64858	1.93116	5882.74
FOSL2	NM_005253	6713	6.79789	19.7135	6.59467	9.30276	18.6624	1.01496	2.89951	2.98885	2.0059	18.3692
FOXK1	NM_001037165	11194	9.26297	42.8212	17.9102	9.35743	23.171	10.1353	4.62233	2.39075	2.47594	2.28594
FOXK2	NM_004514	5243	12.5435	34.9783	12.8893	14.1116	33.5517	10.0078	2.78834	2.71354	2.37743	3.35223
FOXO3	NM_201559	7318	0.553621	1.49942	0.276773	1.13889	2.26294	0.553823	2.7035	5.39801	1.98522	4.07867
FRAS1	NM_025074	15871	2.20295	7.41606	2.72112	2.37633	5.64988	1.55563	3.3649	2.72437	2.37657	3.62955
FRMD8	NM_031904	3684	1.83514	7.50009	1.0794	2.4745	11.7668	1.07989	4.0847	6.94194	4.7533	10.8862
FRYL	NM_015030	11692	3.63212	6.06929	2.42127	2.11443	3.29917	2.0763	1.67055	2.50562	1.55957	1.5882
FURIN	NM_001289823	4191	6.57009	27.3058	5.79689	9.3132	19.7464	7.73248	4.15545	4.70962	2.12003	2.55337
FUT1	NM_000148	4246	2.00272	4.49201	1.90718	3.69945	10.395	2.86207	2.24183	2.35407	2.80912	3.63071
FYCO1	NM_024513	8514	2.56703	4.4223	2.13908	2.12348	8.74403	0.475536	1.72206	2.06642	4.11584	18.3492
FZD1	NM_003505	6894	2.60646	4.60378	1.62891	0.984808	5.0732	0.931206	1.76562	2.82456	5.14623	5.44214
FZD7	NM_003507	3851	2.62868	5.88138	3.68008	3.46077	14.3266	3.15556	2.23654	1.59773	4.13851	4.53866
FZR1	NM_001136198	3446	5.05281	10.5161	3.81875	4.69638	18.4118	5.87761	2.08082	2.75308	3.9196	3.13201
GADD45A	NM_001924	1352	9.68311	16.9308	7.33535	21.0404	35.9814	14.677	1.74831	2.3078	1.71003	2.45138
GADD45B	NM_015675	1371	3.23938	5.89525	0	9.34685	16.0499	8.83825	1.81931	5895.25	1.71696	1.81576
GAREM1	NM_001242409	7434	1.55367	3.11696	0.863084	1.48809	2.35203	0	2.0049	3.60724	1.57951	2352.03
GAREM2	NM_001168241	4164	2.62749	9.05291	1.21635	2.51662	13.9221	0.973499	3.44414	7.43658	5.52988	14.2865
GAS2L1	NM_152236	2519	2.54667	10.3088	4.77494	4.67762	13.0122	6.3692	4.04634	2.15848	2.78119	2.04266
GATA2	NM_001145661	3470	1.98093	4.25369	1.16512	1.09568	3.17524	0	2.14624	3.64772	2.89532	3175.24
GBA2	NM_020944	3611	6.50403	14.9215	3.64431	5.6682	16.8066	5.60904	2.29384	4.09334	2.96455	2.99581
GBF1	NM_001377137	6403	8.68111	16.4449	6.91944	6.28549	10.7137	1.88788	1.89411	2.37627	1.70425	5.672
GBX2	NM_001301687	2177	0.67481	2.64903	0.562314	0.528827	1.53252	0	3.91978	4.70258	2.8925	1532.52
GCN1	NM_006836	8680	12.6132	41.8077	11.2113	11.0377	35.0073	2.804	3.31434	3.72873	3.17132	12.4803
GDPD5	NM_030792	3561	2.78999	8.36271	2.21914	3.13055	16.415	2.5373	2.99633	3.76674	5.2418	6.46692
GEMIN5	NM_015465	5404	2.47272	4.58828	1.31118	1.67356	5.1047	0	1.85481	3.49668	3.04838	5104.7
GET4	NM_015949	2090	5.43012	8.67789	1.93914	6.61103	13.2116	1.93994	1.59781	4.47281	1.99811	6.8068
GGA1	NM_001363771	3211	9.73883	20.6726	9.28995	13.2556	33.6092	7.6915	2.12248	2.22503	2.53529	4.36909
GGA3	NM_138619	3871	7.9276	15.6396	5.40498	8.10876	22.7953	13.3895	1.97256	2.89302	2.81084	1.70235
GGT7	NM_178026	2638	2.60748	4.15416	1.91711	3.60602	18.8085	9.2065	1.59256	2.16576	5.2144	2.04273
GLI1	NM_005269	3968	0.337193	1.72088	0	0.925028	1.53164	0	5.08844	1720.88	1.65399	1531.64
GNA12	NM_001293092	4317	6.32559	20.6064	12.6968	6.94723	11.3237	3.6952	3.2571	1.62282	1.62972	3.06361
GNAZ	NM_002073	3170	3.14745	8.1253	1.21046	4.12668	9.8962	3.63304	2.58073	6.70701	2.39752	2.7232
GPAT4	NM_001363197	6284	4.42787	11.7129	4.81278	4.56383	10.4922	1.28395	2.64467	2.4332	2.29848	8.16544
GPC2	NM_152742	2546	7.03272	13.6183	5.07894	5.69506	13.8408	3.12684	1.93615	2.68081	2.42989	4.42503
GRAMD2A	NM_001012642	3284	0.737992	2.60715	0.614923	0.433646	3.35185	1.23051	3.52798	4.23291	7.71168	2.72174
GRB10	NM_001371009	5173	3.09521	6.46942	3.86882	3.45646	8.43437	0.774078	2.08947	1.67176	2.43947	10.882
GRID1	NM_017551	6153	0.346098	1.14118	0.34611	0.651016	3.30138	1.38515	3.28777	3.28765	5.06334	2.3817
GRIN2D	NM_000836	5093	5.486	10.6732	5.56522	5.84119	14.0827	5.56765	1.94517	1.91749	2.41051	2.52892
GRK5	NM_005308	6798	0.79142	2.6096	1.58276	1.67473	7.54884	0	3.2932	1.64772	4.50481	7548.84
GRK6	NM_002082	2952	3.15491	8.15712	5.14366	5.32105	8.4103	1.3722	2.58471	1.58555	1.58028	6.12459
GRTP1	NM_024719	1415	3.39322	8.6575	2.82761	5.98308	17.3374	0	2.55066	3.06069	2.89726	17337.4
GTF2IRD1	NM_001199207	3368	3.48676	7.66426	3.77699	3.96208	12.6685	4.65077	2.19747	2.02866	3.19664	2.72338
GTPBP6	NM_012227	1907	3.39737	7.75119	1.06164	2.49604	4.33963	0	2.28085	7.2943	1.73791	4339.63
GTSE1	NM_016426	2983	2.34212	6.89501	2.92752	0.30591	1.77282	0	2.94266	2.35444	5.77637	1772.82
HAS3	NM_001199280	4191	13.6768	28.4244	5.75847	8.12314	19.6154	2.88042	2.07813	4.93524	2.41445	6.80754
HAUS4	NM_001166269	1638	2.48409	4.38794	2.48415	0.291968	10.1543	2.48518	1.76571	1.76566	34.66	4.08429
HCFC1	NM_005334	8876	6.39157	15.2793	9.13051	4.80171	29.465	8.17285	2.39016	1.67325	6.13508	3.60479
HDAC7	NM_001368046	4253	4.14249	13.6363	7.29601	5.09083	15.3931	7.53472	3.29101	1.86875	3.0231	2.04269
HDDC3	NM_001286451	1856	1.50813	2.6638	0	1.77276	5.13702	0	1.76513	2663.8	2.89612	5137.02
HECTD1	NM_015382	9445	6.66279	10.5996	4.08133	4.04573	6.91369	2.20705	1.59063	2.59647	1.70846	3.13112
HECTD4	NM_001109662	15782	3.69547	14.1659	3.01393	2.37224	7.14195	1.31094	3.83229	4.6986	3.00937	5.4438
HEG1	NM_020733	9195	0.619092	1.35402	0.331574	0.571819	6.32699	0	2.18358	4.07134	11.0453	6326.99
HELZ2	NM_001037335	10002	3.36023	17.8774	5.4652	8.51861	54.8848	8.5051	5.3187	3.27053	6.44217	6.4524
HERC1	NM_003922	15197	2.29149	7.90683	2.79761	2.03589	3.26736	0.79962	3.44902	2.82527	1.60409	4.08103
HERC2	NM_004667	15363	2.79363	13.91	1.51769	2.23414	13.7569	1.05628	4.97742	9.15921	6.15484	13.0116
HES2	NM_019089	4260	1.23564	4.47723	2.85149	1.89947	7.12305	0.950864	3.62048	1.56959	3.74804	7.48327
HES6	NM_018645	1368	7.79785	19.6765	4.87347	15.0591	22.7668	5.57201	2.523	4.03664	1.51173	4.08519
HEXA	NM_001318825	4818	2.63513	4.82686	1.09786	1.72086	5.98386	2.92894	1.83104	4.3926	3.47523	2.04232
HEYL	NM_014571	4077	2.26384	4.23048	2.21453	1.27269	6.03477	0	1.86789	1.90947	4.73803	6034.77
HIP1	NM_005338	8009	2.41743	4.03287	2.51807	2.72333	10.6363	1.00762	1.66756	1.60094	3.90417	10.5453
HIP1R	NM_003959	4509	7.06639	12.7448	4.6958	8.30649	20.1089	5.36892	1.80333	2.71352	2.42058	3.74474
HIRA	NM_003325	4052	3.93522	13.3079	3.53148	3.43975	14.4356	5.04712	3.38087	3.76729	4.19549	2.8596
HIVEP2	NM_006734	9697	0.999283	1.71625	0.312307	1.07685	1.98578	0.416561	1.71577	5.47786	1.84235	4.75566
HIVEP3	NM_024503	12617	0.816184	2.65283	1.46912	1.42006	6.22801	2.28638	3.24631	1.8045	4.38265	2.72277
HMGXB3	NM_014983	5258	4.4193	10.6726	3.74503	4.31441	15.3084	1.4986	2.41446	2.84905	3.54738	10.2084
HOXB13	NM_006361	3037	0.80024	2.66997	0.666839	0.627074	13.6293	0	3.33229	3.99792	21.7002	13629.3
HOXB4	NM_024015	2002	1.19502	3.75268	0.99576	0.936488	10.8552	0	3.13764	3.76487	11.579	10855.2
HPS6	NM_024747	2688	3.94014	13.7409	2.6519	6.0568	11.3564	4.54812	3.48653	5.17958	1.87467	2.4964
HR	NM_005144	5516	3.8907	13.9176	1.65164	2.67508	27.5057	1.46876	3.57622	8.42142	10.2784	18.7144
HSPG2	NM_001291860	14344	3.95244	14.0292	4.23455	6.2225	20.7716	3.95394	3.54862	3.31226	3.3376	5.25205
HTT	NM_002111	13475	4.8681	15.1452	3.98154	3.99164	13.7161	2.70557	3.11048	3.80291	3.43535	5.06771
HUWE1	NM_031407	14731	14.0645	41.0161	16.0691	10.6881	31.0647	7.96927	2.91608	2.55232	2.90619	3.89757
ICE1	NM_015325	7930	3.41349	5.27938	2.03778	1.73677	3.12371	0.509661	1.54617	2.58948	1.79753	6.11699
IDUA	NR_110313	2218	2.74343	6.89175	2.28606	12.6846	36.1331	5.48894	2.51118	3.01337	2.84835	6.5817
IER5L	NM_203434	2710	13.8962	55.9526	19.7975	23.7999	75.3266	31.3904	4.02619	2.8261	3.16487	2.39959
IFNLR1	NM_170743	4562	1.41984	2.29894	1.33103	1.04313	7.8592	0	1.61801	1.7259	7.52704	7859.2
IFRD2	NM_006764	2109	7.48805	18.9917	6.23979	7.44803	14.388	3.84139	2.53593	3.04316	1.93152	3.74454
IGF1R	NM_000875	12235	3.67368	9.15851	2.81295	3.46245	9.69502	4.96627	2.49233	3.25468	2.79924	1.95178
IGF2R	NM_000876	14042	4.46976	10.323	4.10914	4.20332	7.85806	1.15388	2.309	2.51159	1.86905	6.8042
IGSF3	NM_001542	7327	2.60977	5.72619	2.81619	1.92013	6.13955	0	2.19329	2.03259	3.1958	6139.55
IL17RD	NM_017563	8698	2.3154	5.126	2.66263	1.95969	5.36321	0.926499	2.21291	1.92444	2.73537	5.78244
IL17RE	NM_153483	2721	2.23221	5.4324	2.23207	1.22451	8.11046	0	2.43255	2.43271	6.61801	8110.46
IL4R	NM_000418	3624	3.84185	7.62609	3.01843	4.12894	13.4601	6.58856	1.98449	2.52567	3.25916	2.04264
IMPDH1	NM_000883	2611	0.775392	4.93075	0.775403	2.3699	12.6782	1.55141	6.35085	6.35076	5.3474	8.16677
INF2	NM_022489	7623	7.99545	22.8796	7.73718	12.6326	20.499	6.88039	2.86123	2.95672	1.62258	2.9789
INO80	NM_017553	6364	3.13447	7.2315	1.27934	2.85742	4.79371	1.91979	2.30635	5.64811	1.67705	2.49569
INPP5E	NM_019892	3417	3.57496	6.31468	2.08532	4.0623	14.6128	2.38425	1.76587	3.02671	3.59629	6.1263
INPPL1	NM_001567	4786	7.12812	16.6864	6.87018	9.28772	20.4773	5.15482	2.3406	2.42847	2.20453	3.97168
INTS1	NM_001080453	6981	9.9868	36.9894	10.1606	11.5347	58.5417	9.29358	3.70346	3.6401	5.07482	6.29848
INTS11	NM_001256456	2629	9.08742	19.951	6.16077	9.41488	16.7886	7.70416	2.19521	3.23787	1.78301	2.17887
INTS5	NM_030628	3285	4.19108	10.1607	5.85492	3.9123	10.077	0	2.42379	1.73512	2.57505	10077
IPP	NM_005897	3093	1.49371	2.34526	0.93346	0.438974	1.69602	0	1.56904	2.50975	3.85482	1696.02
IQCE	NM_152558	6857	2.71128	4.8585	2.9469	2.63282	5.62152	0.589609	1.79129	1.64812	2.13436	9.51818
IQGAP3	NM_178229	6013	3.27847	9.53334	4.85062	1.1797	1.82323	0.66928	2.90697	1.96498	1.5442	2.7201
IRAK1	NM_001569	3581	4.19558	10.8158	5.52773	5.06521	20.0849	9.07498	2.57728	1.95628	3.96448	2.21297
IRF5	NM_001098629	2899	1.07476	3.164	0.671685	1.73721	2.74574	0	2.94118	4.70354	1.57964	2745.74
IRS1	NM_005544	8736	13.5812	52.7262	11.8193	13.7034	66.312	4.63692	3.88201	4.46064	4.83875	14.2978
IRS2	NM_003749	8156	2.31456	4.49708	0.578466	2.7207	9.85487	1.73657	1.94212	7.76074	3.62084	5.67163
ITGA3	NM_002204	4889	30.963	88.4524	33.3744	65.1364	139.162	49.8816	2.85662	2.65023	2.13643	2.78979
ITGA5	NM_002205	4250	3.71582	9.64874	3.33454	4.70397	15.5778	2.85931	2.59596	2.8927	3.31093	5.44621
ITGB4	NM_000213	5896	25.5308	56.4884	23.5143	20.2972	43.9395	15.4587	2.21247	2.4022	2.1647	2.84221
ITGB5	NM_002213	4439	4.43855	8.82003	1.38698	5.43499	15.7489	3.70025	1.98669	6.35458	2.89715	4.25502
ITPR2	NM_002223	12564	0.997502	1.62941	0.804476	0.491747	1.53454	0	1.63186	2.02292	3.11426	1534.54
ITPR3	NM_002224	9079	12.1959	35.5338	13.3387	15.0215	36.6548	8.97101	2.91333	2.66375	2.44	4.08546
ITPRIPL2	NM_001034841	7699	9.67751	19.633	11.176	11.4996	17.9152	7.8923	2.02851	1.75655	1.55776	2.26967
JADE1	NM_001287439	5831	1.29136	1.94306	1.07606	0.927656	6.35389	1.7943	1.5035	1.80404	6.84203	3.53918
JAG2	NM_002226	5772	5.20478	22.963	15.0932	7.58657	28.8386	7.63654	4.41105	1.52131	3.80077	3.7759
JAK2	NM_001322195	4904	0.698556	1.09676	0.581927	0.912327	2.6438	0.776432	1.56779	1.88147	2.89469	3.40068
JAK3	NM_000215	5384	1.04321	1.75496	0.931383	1.22634	3.55352	1.49091	1.68065	1.88223	2.89531	2.38186
JMJD7-PLA2G4B	NM_005090	3367	2.1647	6.51438	1.50316	3.67551	15.5667	4.81239	3.00798	4.33092	4.23409	3.23403
JOSD1	NM_014876	3639	7.14203	12.2329	3.51671	11.1303	24.3274	2.16504	1.71256	3.4775	2.18549	11.2313
JUN	NM_002228	3257	3.6557	8.75304	4.87404	9.88378	24.9044	6.09516	2.3937	1.79548	2.51947	4.08526
JUNB	NM_002229	1830	26.0887	48.0504	13.3782	40.3654	60.7617	20.0758	1.84174	3.59143	1.50525	3.02645
JUND	NM_005354	1929	42.391	110.523	31.4568	110.573	310.569	88.7352	2.60717	3.51338	2.8087	3.49991
KALRN	NM_001024660	15973	0.304203	0.597012	0.126676	0.387296	1.72702	0.25355	1.95611	4.67598	4.44769	6.7846
KANK3	NM_198471	2787	2.6152	5.13262	2.54253	4.09894	33.6533	5.81393	1.96186	2.01791	8.20824	5.7874
KANSL1	NM_001193466	5331	9.91701	19.7898	8.89458	4.89433	17.5344	3.7865	1.99534	2.22468	3.58187	4.62956
KANSL3	NM_001349256	3625	3.72905	8.9114	4.11271	2.57852	4.48303	2.19439	2.38908	2.16627	1.73793	2.04202
KAT2A	NM_001376227	3118	3.51322	6.89501	3.90343	3.36501	6.20501	2.60333	1.96203	1.76594	1.84343	2.38257
KAT6A	NM_006766	9153	3.7444	7.36611	4.07464	3.0034	6.00214	0	1.96671	1.80735	1.99778	6002.14
KAZALD1	NM_030929	3232	0.966377	2.46555	1.20793	1.13597	2.19451	0	2.5487	2.03946	1.93013	2194.51
KBTBD11	NM_014867	6911	1.62762	2.7685	0.301347	1.34641	5.33889	1.80918	1.69991	9.15671	3.96233	2.94936
KCNG1	NM_002237	2189	2.55363	13.102	0.911886	13.0791	58.4024	29.1953	5.12873	14.3523	4.46496	2.00033
KCNH2	NM_000238	4292	1.65179	4.11246	0.943843	2.66289	10.9314	1.88851	2.48819	4.35253	4.10355	5.78533
KCNH3	NM_012284	4020	9.20539	21.0637	8.89112	10.206	25.6545	11.5111	2.28794	2.3688	2.51342	2.22849
KCNJ11	NM_000525	3411	0.949586	3.21513	0.296732	1.39546	8.08727	0	3.38226	10.7987	5.79126	8087.27
KCNK5	NM_003740	3783	1.2844	4.41151	1.07029	1.38407	2.18758	0	3.432	4.11795	1.5794	2187.58
KCNQ2	NM_172107	9247	2.36061	7.51559	3.1691	2.261	17.1733	2.62389	3.18241	2.37077	7.59208	6.54248
KCTD12	NM_138444	6231	0.649199	1.45255	0.16221	0.534156	3.09605	1.94838	2.23402	8.89989	5.78532	1.58822
KCTD15	NM_001129995	3906	2.5739	5.21321	0.257275	2.29947	4.9097	0	2.02463	20.1847	2.13422	4909.7
KDM3B	NM_016604	6724	7.54817	13.7876	5.94329	4.33164	10.1224	0.594524	1.82637	2.31946	2.33631	16.9975
KDM6B	NM_001348716	6588	5.7467	20.6573	5.14159	10.0973	26.3742	9.68238	3.59401	4.01691	2.61176	2.72366
KHNYN	NM_001290256	6232	6.17269	12.8542	7.14695	5.42294	11.5088	1.94997	2.08209	1.7983	2.12185	5.899
KIAA0100	NM_014680	7428	12.3631	50.9856	12.2537	9.85925	35.2475	17.9796	4.12368	4.1605	3.57471	1.96031
KIAA0319L	NM_024874	4777	4.96486	9.11636	4.20732	4.64915	10.3188	5.05092	1.83581	2.16627	2.21903	2.04256
KIAA0513	NM_014732	7406	1.42154	3.92726	1.77682	2.24947	5.2147	2.73485	2.76075	2.20904	2.31716	1.90606
KIAA0930	NM_015264	6287	6.18312	11.8316	5.47443	5.98118	11.8469	5.79884	1.91322	2.16085	1.98036	2.04262
KIAA1522	NM_020888	5493	9.6519	25.022	11.2225	10.8181	22.9371	8.23341	2.59218	2.22943	2.12007	2.78552
KIAA2013	NM_138346	2819	2.15156	4.89829	2.15142	2.36056	8.79463	1.43491	2.27557	2.27571	3.72407	6.12476
KIF26A	NM_015656	6757	1.79783	11.8554	4.04488	3.73354	33.4769	4.79599	6.59063	2.93024	8.96414	6.97874
KIFC2	NM_001369769	3272	10.9106	30.9515	13.9476	23.4646	62.503	14.8836	2.83656	2.21897	2.6636	4.19916
KIFC3	NM_001318710	3505	2.47204	7.56853	4.32592	6.1025	30.314	9.89218	3.06041	1.74917	4.96667	3.06413
KLF10	NM_005655	2915	6.01054	14.3094	3.26647	4.91506	8.90148	0	2.38033	4.37936	1.81069	8901.48
KLF4	NM_004235	2936	6.59223	12.7176	1.75316	14.8388	57.3311	2.80621	1.92888	7.24992	3.86332	20.4228
KLHL17	NM_198317	2567	9.94957	15.2496	7.10645	11.51	22.5936	1.57986	1.53253	2.14557	1.96278	14.292
KLHL21	NM_014851	4487	3.40721	10.7698	6.72469	2.95121	15.882	1.79395	3.15995	1.60129	5.37968	8.84811
KLHL25	NM_022480	3650	1.53925	4.14283	0.549623	1.2924	3.74499	0	2.68971	7.52389	2.89547	3744.99
KLHL36	NM_024731	7559	7.8746	16.1487	6.56179	4.21901	6.56886	3.21537	2.05047	2.46065	1.5566	2.04232
KMT2B	NM_014727	8485	2.43787	23.6415	7.52848	5.00098	15.1427	5.73841	9.69366	3.13987	3.02735	2.63838
KMT2C	NM_170606	16860	3.22988	9.92567	2.70151	1.94779	7.19828	2.64258	3.07213	3.67276	3.69371	2.72293
KMT2D	NM_003482	20635	5.79691	47.145	12.3024	5.93184	31.2522	10.4302	8.13139	3.83188	5.26767	2.99605
KMT5C	NM_032701	2286	1.57826	6.6082	2.19203	4.53521	20.31	3.50872	4.18436	3.01327	4.4773	5.78678
KSR2	NM_173598	17775	4.01163	6.81261	2.44019	2.09896	4.05479	1.42896	1.69779	2.79069	1.93089	2.83559
KTI12	NM_138417	1708	1.43248	3.09257	0.59681	3.0872	26.0243	0	2.15739	5.17317	8.42702	26024.3
L1CAM	NM_000425	5099	1.89366	4.55265	1.57792	5.65776	12.9006	4.73598	2.40289	2.8834	2.27975	2.72338
LAD1	NM_005558	2627	5.99052	11.0851	4.99184	5.70053	32.551	1.42682	1.85013	2.2202	5.70916	22.7977
LAMA5	NM_005560	11426	20.298	143.245	37.8136	33.1878	271.249	49.6126	7.05674	3.78808	8.1729	5.46723
LAMB2	NM_002292	5692	9.34244	24.6295	7.32024	11.8016	34.1973	22.3188	2.63602	3.36412	2.89744	1.53215
LAMB3	NM_001017402	4307	2.99132	5.28373	1.74486	6.32943	18.3407	5.98497	1.76577	3.02644	2.89723	3.06395
LAMC3	NM_006059	7455	0.929656	2.50218	0.663955	2.49779	7.69034	2.65712	2.68862	3.76293	3.07763	2.89315
LARS2	NM_001368263	4715	1.83048	8.84904	4.33526	0.905977	6.56332	0	4.83164	2.04071	7.23648	6563.32
LAT2	NM_032464	1942	0.923974	2.17629	1.38606	1.95524	6.29523	0	2.35282	1.569	3.21803	6295.23
LATS2	NM_014572	5546	1.82632	4.21507	0.547777	2.31852	3.98132	0.730747	2.3067	7.68085	1.71644	5.44085
LDLR	NM_000527	5173	8.89118	16.2462	4.59865	4.86536	7.31024	3.06703	1.82703	3.53206	1.5022	2.38271
LHPP	NM_022126	1634	5.16671	8.77244	5.40682	4.37857	8.18569	2.40405	1.69755	1.62218	1.86906	3.40354
LIME1	NM_017806	1157	3.85643	13.2743	6.67439	5.57944	18.1884	0	3.44123	1.98855	3.25932	18188.4
LLGL2	NM_001031803	3553	14.2662	34.2704	12.8391	16.099	52.8702	15.9842	2.40204	2.66902	3.28385	3.30745
LMAN2L	NM_001142292	2442	1.32655	4.1004	0	1.36444	15.8149	1.65877	3.08869	4100.4	11.5823	9.52839
LMNB2	NM_032737	4634	23.281	39.8383	20.2719	15.887	30.2944	17.4455	1.71112	1.9651	1.90675	1.73642
LMTK2	NM_014916	8974	3.16882	6.50341	3.16864	3.03318	4.93427	0.452832	2.05167	2.05178	1.62623	10.8725
LMX1B	NM_001174146	6324	2.09109	3.85792	1.39402	1.80268	4.27392	2.78933	1.84405	2.7655	2.36955	1.53169
LONRF1	NM_152271	3618	2.62716	6.85984	4.56877	3.08822	10.1161	3.42808	2.61014	1.50113	3.27464	2.95009
LPAR5	NM_020400	2683	0.992752	4.34235	1.0636	0.500141	12.5609	0	4.36965	4.07886	25.0646	12560.9
LPIN3	NM_001301860	4465	3.01226	7.5243	3.19471	2.57523	5.59664	1.82635	2.49706	2.3545	2.17241	3.06271
LRBA	NM_006726	9899	8.01758	19.1232	6.4425	5.62593	9.19615	1.63683	2.38486	2.96782	1.63431	5.61485
LRFN1	NM_020862	3579	3.62008	17.2036	5.17124	5.31922	12.3308	6.46687	4.75096	3.32614	2.31773	1.90647
LRP3	NM_002333	4057	5.69395	13.7968	3.55848	5.79228	9.69755	5.47704	2.42264	3.87608	1.67393	1.77026
LRP4	NM_002334	8155	0.885895	2.4341	0.738254	0.925685	6.37084	1.47714	2.74452	3.29264	6.87487	4.31004
LRP5	NM_002335	5177	4.08143	12.5238	1.9621	6.64308	14.9719	2.3556	3.06772	6.37958	2.25342	6.35319
LRRC14	NM_014665	5337	5.65859	16.7028	9.43059	6.20826	15.9336	3.01906	2.95123	1.77094	2.5661	5.27592
LRRC24	NM_001024678	1762	3.88476	16.4145	6.28387	7.79	34.2487	2.28603	4.22427	2.61175	4.39594	14.9752
LRRC56	NM_198075	2765	2.77336	13.5794	4.01407	5.83411	25.8555	5.84106	4.89462	3.38212	4.43102	4.42574
LRRC8E	NM_001268284	3745	2.27063	4.0743	1.35145	1.39809	3.683	0	1.79356	3.01254	2.63243	3683
LRRK1	NM_024652	15673	1.12395	3.01208	1.74394	0.865612	4.7525	0.387697	2.67752	1.72618	5.484	12.2268
LRWD1	NM_152892	2160	4.11917	8.01389	2.23853	7.36833	20.7412	3.5832	1.94504	3.57839	2.81453	5.78684
LSM10	NM_032881	860	2.62079	7.71566	1.09198	4.62127	26.7823	0	2.94289	7.05929	5.79419	26782.3
LTBP3	NM_001130144	4702	7.40621	22.4115	12.9173	11.8442	50.65	18.9534	3.02564	1.73487	4.276	2.67221
LTBP4	NM_001042544	5145	12.75	51.0656	24.594	25.627	104.553	34.643	4.00483	2.07626	4.07963	3.01792
LTK	NM_002344	3072	2.33084	5.79445	2.26598	8.37218	39.6981	1.29544	2.48493	2.55601	4.7411	30.621
LYST	NM_000081	13466	0.92991	1.91631	0.871737	0.990648	2.17769	0.290651	2.05854	2.19575	2.19603	7.46676
LZTR1	NM_006767	4281	6.47511	12.487	6.0995	5.40528	10.868	5.63271	1.92817	2.04689	2.01026	1.92911
MAD1L1	NM_001013837	2692	1.92665	6.23917	3.21098	3.39727	12.0319	1.60616	3.23667	1.94247	3.54059	7.48641
MADD	NM_001376571	6036	3.3654	7.84673	2.35563	1.66152	6.41954	3.36668	2.3309	3.32965	3.86134	1.90622
MAEA	NM_001017405	2182	5.62153	10.6768	2.26656	4.05011	6.17685	0	1.89893	4.70849	1.52473	6176.85
MAFF	NM_012323	2374	1.82624	4.39873	2.49015	3.90318	12.4413	6.64345	2.40731	1.76574	3.18666	1.87243
MAML1	NM_014757	5747	5.37737	10.3314	3.89132	4.32492	9.64027	2.12344	1.92092	2.65431	2.22849	4.5378
MAN2A2	NM_001320977	6685	3.54426	6.26029	2.80569	2.15253	4.42658	0	1.76582	2.23049	2.05549	4426.58
MAN2B1	NM_000528	3185	3.39118	7.54288	1.56984	5.75798	13.6902	1.25647	2.22361	4.80181	2.3772	10.8871
MAP1S	NM_018174	3288	3.78325	8.62251	3.96608	5.30798	16.6279	2.44171	2.27853	2.17351	3.13204	6.80717
MAP3K11	NM_002419	3543	5.66656	19.017	8.49943	5.19557	11.5809	1.13374	3.35542	2.23718	2.22857	10.2058
MAP3K5	NM_005923	5157	1.16915	1.92746	0.779325	1.00787	2.12401	0.779754	1.64719	2.47008	2.10533	2.72046
MAPK8IP3	NM_001318852	5664	6.57722	15.7427	3.75311	8.31985	18.5074	5.72152	2.39315	4.19346	2.22422	3.23414
MAPKAPK2	NM_032960	3091	9.37594	18.6144	10.7003	9.90327	18.5139	4.07805	1.98512	1.73944	1.86929	4.53878
MAPKAPK5	NM_001371479	2636	4.24197	8.94957	1.32549	3.73982	7.22455	1.76813	2.10927	6.74682	1.93128	4.08366
MAPKBP1	NM_001128608	7200	2.34577	6.18224	2.23391	2.16655	3.80491	0	2.63437	2.76621	1.7554	3804.91
MARK4	NM_031417	5231	3.62992	9.73114	4.24758	5.62878	12.6274	6.18093	2.68008	2.29044	2.24297	2.04264
MARVELD1	NM_031484	3213	4.8787	18.2659	3.43988	2.79392	16.1918	7.50855	3.74324	5.3085	5.79331	2.15616
MARVELD3	NM_001017967	2217	0.900567	2.33321	0.900579	1.05868	3.68136	0	2.58795	2.58791	3.47404	3681.36
MAST2	NM_001324320	5765	3.58217	9.51168	2.2826	4.21084	15.7907	2.81065	2.65454	4.16522	3.74911	5.61616
MBD3	NM_001281453	5678	8.26378	37.5891	7.0888	9.33327	88.3099	22.6939	4.54811	5.30186	9.46083	3.89117
MBD5	NM_018328	6016	0.874955	1.74372	0.672954	0.31642	0.917032	0	1.99065	2.5873	2.88901	917.032
MBD6	NM_052897	4202	6.24469	27.8054	10.7327	11.6992	21.9357	9.76108	4.45194	2.59049	1.87482	2.24703
MCF2L	NM_001320815	6527	1.42756	4.6045	1.55161	2.18881	4.2283	1.24179	3.22318	2.96565	1.9309	3.40226
MCM3AP	NM_003906	6403	6.79899	15.7043	6.86406	4.91828	15.5877	3.26998	2.30947	2.28758	3.1687	4.76545
MCM5	NM_006739	3458	6.99803	14.6082	4.77113	2.61742	7.58443	0	2.08718	3.06115	2.89657	7584.43
MDFI	NM_005586	1606	3.56656	6.71979	4.16082	2.51552	17.8181	7.13594	1.88358	1.61463	7.08046	2.49661
MDN1	NM_014611	18485	5.13719	18.973	6.39335	3.63376	16.5139	2.2247	3.69255	2.96716	4.54332	7.41962
MED12	NM_005120	6924	2.61469	6.63685	2.17877	2.11735	4.74998	0	2.53732	3.04475	2.2423	4749.98
MED13	NM_005121	10461	11.6856	17.8839	6.19076	6.04943	13.9708	3.48373	1.53029	2.88834	2.30906	4.00916
MED13L	NM_015335	9885	11.0538	39.456	10.2546	6.75059	17.9434	9.50296	3.56914	3.84728	2.65765	1.88799
MED14	NM_004229	7996	3.47014	5.98853	3.29047	2.03954	3.26068	1.79555	1.72523	1.81941	1.59795	1.81497
MEGF6	NM_001409	7443	4.84452	10.5121	6.53168	14.7809	42.2742	22.8708	2.16944	1.60915	2.85987	1.84831
MEGF8	NM_001271938	11135	4.06124	14.6033	4.71379	6.30848	18.2802	7.61778	3.59489	3.09734	2.89725	2.39936
METTL27	NM_152559	921	2.6124	5.12718	2.17692	5.1182	26.6959	0	1.96188	2.35417	5.21487	26695.9
MEX3D	NM_001174118	2927	11.4044	51.0311	14.0648	17.6957	104.107	3.04232	4.47431	3.62804	5.88286	34.2084
MFHAS1	NM_004225	6398	5.23981	14.7902	6.16423	6.15936	25.1973	13.1046	2.82213	2.39898	4.09023	1.92264
MFN2	NM_014874	4407	6.14708	11.2147	6.27671	3.96916	6.4879	1.73221	1.8241	1.78643	1.63417	3.74329
MFSD12	NM_174983	2137	10.4314	26.5773	17.069	17.8359	55.5592	3.79466	2.54756	1.55696	3.11485	14.6376
MFSD5	NM_001170790	2039	3.37609	7.71711	4.46817	1.63407	4.05869	0	2.28514	1.72674	2.48227	4058.69
MGAT1	NM_001114618	3170	4.59858	15.4931	4.15125	4.05412	17.4043	0	3.36838	3.73126	4.29192	17404.3
MGAT4B	NM_014275	2365	9.53554	32.4919	17.6729	10.0495	56.0004	26.315	3.40709	1.83841	5.57192	2.128
MIB2	NM_080875	3248	7.64248	11.7135	5.15543	11.2653	33.8831	13.3491	1.53249	2.27164	3.00747	2.53803
MICAL3	NM_015241	9446	2.87276	8.12883	3.96596	3.1753	17.818	1.28678	2.82864	2.04913	5.60968	13.8362
MICALL1	NM_033386	4710	2.52225	10.1837	4.50405	7.0949	16.5698	0.901165	4.03593	2.2605	2.33513	18.3668
MLLT1	NM_005934	4532	7.4604	17.5701	11.4598	7.39614	25.7182	7.19353	2.3548	1.53305	3.47677	3.57468
MLLT10	NM_001195626	5143	4.58824	9.52863	1.87684	2.89282	6.25138	1.66901	2.0763	5.07425	2.16025	3.74331
MLLT6	NM_005937	7824	7.77469	20.5354	8.09829	9.23429	17.6549	10.8023	2.64097	2.53545	1.91168	1.63422
MLXIP	NM_014938	8388	8.27073	27.8872	9.07582	5.3698	24.5687	11.064	3.37138	3.07235	4.57449	2.2204
MMP14	NM_004995	3701	1.80266	4.11282	1.12659	2.25151	8.44306	3.38136	2.28026	3.64745	3.74829	2.49621
MMP17	NM_016155	2411	2.35128	10.2841	2.93894	6.51498	22.8833	5.04047	4.37197	3.49806	3.51187	4.53901
MON2	NM_015026	13263	2.96503	5.23723	2.04817	1.69685	3.72093	1.17084	1.76574	2.55579	2.19156	3.17528
MORN1	NM_024848	1645	0.87928	3.36515	0	3.10092	11.9808	4.39826	3.82282	3365.15	3.86237	2.72336
MPP3	NM_001353080	3049	2.0631	4.85895	0	2.10188	3.74802	1.37594	2.35403	4858.95	1.78233	2.72199
MPRIP	NM_001364716	15419	8.01733	18.055	8.40495	7.96941	17.6187	4.06559	2.25172	2.14789	2.21051	4.33254
MROH1	NM_032450	5349	9.28698	30.9409	9.81523	14.8222	56.0666	7.55334	3.33129	3.15202	3.78236	7.42178
MROH6	NM_001100878	3264	6.60351	19.0731	9.34417	14.2067	56.0204	3.73922	2.88789	2.04096	3.94297	14.9778
MRPL21	NM_181514	693	5.81794	11.9892	4.3633	3.41946	27.7443	5.82016	2.06038	2.74711	8.1113	4.76612
MRPL46	NM_022163	986	1.21469	3.33778	2.02452	0.475981	24.8272	0	2.74558	1.64787	52.0508	24827.2
MRPL55	NM_181462	865	1.40432	2.75617	0	2.75136	28.7019	0	1.96124	2756.17	10.4281	28701.9
MRPS12	NM_033362	1046	7.14364	21.6941	3.75957	3.97763	7.68404	0	3.03641	5.76882	1.93133	7684.04
MSRB1	NM_016332	1404	1.44206	4.07538	0	0.338975	5.89433	0	2.82413	4075.38	17.3376	5894.33
MST1R	NM_002447	4771	6.25029	20.4505	7.36615	4.51324	18.2486	3.57296	3.27141	2.77591	4.04245	5.10599
MSX2	NM_002449	2195	1.65052	2.59128	0	1.50904	6.24678	1.83459	1.56903	2591.28	4.13684	3.40316
MTA2	NM_004739	3083	7.65266	17.4013	9.23561	4.80798	21.5725	11.8793	2.27359	1.88395	4.48587	1.81581
MTG2	NM_015666	2936	3.17213	5.35942	1.37913	1.62123	7.51651	1.37968	1.689	3.88326	4.63346	5.44408
MTHFD1L	NM_001242767	3477	5.06587	14.6738	3.49364	7.16431	29.355	3.49508	2.89602	4.19894	4.09683	8.39655
MTHFR	NM_001330358	7207	2.80924	8.1379	4.07326	1.45298	11.1002	6.1828	2.89581	1.99739	7.63433	1.79504
MTMR14	NM_001077525	2452	1.60362	3.49351	0.801707	2.45063	6.555	0	2.17716	4.35216	2.67373	6555
MTMR3	NM_021090	8987	3.69259	5.62095	3.71503	2.3291	5.82881	3.15342	1.52181	1.51262	2.50153	1.84782
MTMR8	NM_017677	2660	0.456517	0.895881	0	0.17883	2.07329	0	1.95814	895.881	11.5292	2073.29
MTOR	NM_004958	8721	4.17692	13.2801	3.24859	3.21873	13.5953	4.64281	3.17864	4.08671	4.22249	2.92761
MUS81	NM_001350283	2367	3.03313	6.94505	1.26376	3.36741	6.88779	0	2.28898	5.49118	2.04482	6887.79
MVB12B	NM_033446	4838	1.59488	4.15144	1.88849	1.28269	2.28732	0	2.60134	2.19712	1.78183	2287.32
MXD4	NM_006454	3871	4.93688	14.2808	9.39044	4.54171	22.6652	10.7364	2.89209	1.52062	4.98936	2.11086
MXRA7	NM_001008528	5671	1.40475	2.27447	0.987684	1.23846	2.39247	0.878322	1.61798	2.3005	1.93026	2.72082
MYBL2	NM_002466	2668	4.95774	9.27209	0.729024	5.3136	8.94029	2.91738	1.86985	12.7011	1.68221	3.06344
MYCBP2	NM_015057	15077	4.82408	12.5355	3.23394	3.04129	14.137	1.88719	2.59799	3.87504	4.64685	7.48708
MYCL	NM_001033082	3158	0.7452	3.21785	1.24207	1.16802	7.19261	0	4.31231	2.58862	6.15269	7192.61
MYO10	NM_012334	11442	3.71981	8.30161	2.12546	2.99837	12.7913	1.77201	2.23113	3.90395	4.26465	7.21443
MYO1E	NM_004998	8644	5.07155	8.49143	5.54677	7.04826	23.7529	2.37816	1.674	1.5306	3.36957	9.98373
MYO7A	NM_000260	7483	0.216937	0.574803	0	0.318756	1.84767	0.542609	2.63748	574.803	5.77838	3.3989
MYO9B	NM_004145	7606	5.10751	13.2818	3.72403	6.69184	14.4978	3.72558	2.59993	3.56554	2.16617	3.89037
MYOF	NM_013451	6860	14.912	30.8687	14.793	8.48627	19.7531	11.8394	2.06992	2.08657	2.32738	1.66828
MYOM3	NM_152372	5760	1.11699	3.69946	1.57076	1.55926	2.37805	0.698352	3.30902	2.3537	1.52414	3.40036
MYORG	NM_020702	6447	1.06806	2.88535	1.88469	1.6248	4.70815	0.62851	2.69896	1.53013	2.89589	7.47906
MYRF	NM_001127392	5940	7.90903	18.3055	4.94292	7.13307	19.0439	12.2773	2.31422	3.70263	2.66943	1.55102
NACA2	NM_199290	797	0	3.09629	0	0.618169	3.58257	0	3096.29	3096.29	5.78609	3582.57
NADK	NM_001198994	3615	5.09903	10.7034	3.87955	5.60301	13.5927	4.43563	2.0987	2.75823	2.42554	3.06375
NADSYN1	NM_018161	2679	3.1661	8.43767	4.58239	5.28886	9.08174	0	2.66416	1.84093	1.71682	9081.74
NAGLU	NM_000263	2474	1.89213	3.42788	1.81927	1.53984	9.91579	2.91219	1.81069	1.88317	6.43532	3.40376
NAPRT	NM_145201	1682	16.4065	36.9591	14.266	36.6151	59.9339	33.3013	2.25257	2.59054	1.63682	1.79969
NAV1	NM_020443	13023	2.95383	5.30902	1.94318	2.19297	4.66007	1.86629	1.79673	2.73073	2.12404	2.49564
NAV2	NM_001244963	11669	0.326168	0.725552	0.453059	0.511309	1.48162	0	2.21767	1.59793	2.89204	1481.62
NBEAL2	NM_015175	8842	6.71978	30.0313	5.16004	7.44081	25.6234	11.9305	4.46842	5.81884	3.44317	2.14755
NBL1	NM_182744	2061	7.073	15.9637	5.89391	10.8548	28.1078	5.89644	2.25667	2.70804	2.5892	4.76611
NBPF1	NM_017940	6010	0.136115	0.64143	0	0.640286	3.24701	0	4.67803	641.43	5.06327	3247.01
NCAPD2	NM_014865	4825	6.74039	10.8144	6.52949	2.27793	4.59184	0	1.60418	1.65599	2.01491	4591.84
NCK2	NM_003581	2666	4.34365	7.19878	3.61962	2.0802	14.2477	3.21876	1.65693	1.98827	6.8459	4.42507
NCLN	NM_020170	3680	10.5219	33.977	18.4397	15.1737	25.125	1.08508	3.22886	1.8425	1.65571	23.1336
NCOA6	NM_014071	7083	5.31826	9.83149	3.71688	3.22661	8.57064	3.43244	1.84828	2.64438	2.65541	2.49623
NCOR1	NM_006311	10702	4.46518	8.22773	2.48057	3.0618	7.32315	4.54964	1.84223	3.31553	2.391	1.60926
NCOR2	NM_006312	9001	6.99498	22.2883	9.0291	13.7043	32.3916	7.77511	3.18587	2.46822	2.36344	4.16552
NDOR1	NM_001144026	4844	3.98534	10.8525	4.15125	4.19675	14.1408	0	2.72241	2.61364	3.36865	14140.8
NDST1	NM_001543	8011	3.32817	11.9355	5.54677	2.54888	7.90128	2.01774	3.58514	2.15141	3.09869	3.91397
NDUFA1	NM_004541	416	4.99913	13.7357	2.08289	1.95881	5.67609	0	2.74708	6.59138	2.89624	5676.09
NEK8	NM_178170	3573	0.283341	1.16783	0	0.49963	0.965168	0	4.10714	1167.83	1.9279	965.168
NF2	NM_000268	5948	4.63429	13.6033	7.89143	3.47384	10.9812	2.68757	2.93472	1.72359	3.16021	4.0844
NFATC1	NM_001278669	4873	2.33406	3.69629	1.60964	2.27056	7.67642	0	1.58295	2.29492	3.37936	7676.42
NFKB2	NM_001077494	3125	5.82354	11.1244	6.14681	11.105	26.4485	7.76771	1.90992	1.80949	2.38146	3.40449
NFX1	NM_001318758	4602	2.15062	4.052	2.36566	1.01123	1.75808	0	1.88323	1.71211	1.73684	1758.08
NHSL1	NM_001144060	7062	2.07947	4.4213	2.45485	1.56174	5.90278	2.88935	2.12514	1.80032	3.7772	2.04224
NICN1	NM_032316	3227	2.13315	4.72833	1.88215	1.62254	5.98386	1.25529	2.21555	2.51086	3.68569	4.76312
NINL	NM_025176	4991	1.29806	4.01257	1.62257	3.62405	5.52708	0.811526	3.08883	2.47145	1.52469	6.80235
NISCH	NM_007184	5139	7.3426	18.476	4.6373	6.90504	12.6371	7.73213	2.51593	3.98336	1.82986	1.63415
NLE1	NM_018096	5192	3.40916	11.4964	1.93695	2.91457	10.5571	3.10053	3.37123	5.93227	3.62094	3.40384
NLGN2	NM_020795	4980	8.88999	33.8685	12.4192	11.5772	32.0627	13.0785	3.80931	2.72688	2.76923	2.45136
NLRC5	NM_032206	6724	0.421491	1.91468	0.602117	0.49547	1.64102	0.602415	4.53188	3.17465	3.30537	2.71955
NLRX1	NM_001282144	4131	1.93742	3.29544	1.07629	1.39174	4.39961	0	1.70007	3.05902	3.15896	4399.61
NOB1	NM_014062	1716	2.0531	3.22356	1.71071	2.14531	4.66234	0	1.56933	1.88324	2.17226	4662.34
NOD2	NM_022162	4673	0.541494	2.1258	0.676877	0.636636	2.4597	0	3.91858	3.13597	3.85753	2459.7
NOTCH1	NM_017617	9568	3.61151	14.3468	5.54769	4.44996	21.6394	4.35292	3.97142	2.58562	4.86173	4.97009
NOTCH2	NM_024408	11425	6.1626	13.1413	4.28185	3.32106	10.5858	4.23947	2.13208	3.06834	3.18653	2.49639
NPC1	NM_000271	4760	3.61694	10.2022	2.31306	4.05398	6.87639	0.841428	2.81988	4.40877	1.69579	8.16258
NPHP4	NM_015102	4955	2.34577	4.38151	1.21323	3.04267	19.8379	3.23676	1.86704	3.60846	6.51777	6.12706
NPRL3	NM_001077350	3128	2.36968	6.2786	1.85123	3.13384	13.1169	7.40825	2.64844	3.38975	4.18422	1.77034
NR2F2	NM_021005	5285	8.04311	16.7028	1.18854	7.03278	13.2261	3.17086	2.07641	14.0414	1.88036	4.16981
NR2F6	NM_005234	1804	13.4678	45.1983	16.273	14.2482	53.52	6.73641	3.35578	2.77734	3.75601	7.94371
NRF1	NM_001293163	3578	1.79859	3.44184	2.24822	0.660724	6.12676	1.1246	1.91257	1.53024	9.25879	5.44308
NSD1	NM_001365684	12139	4.02342	9.65916	2.96282	2.63968	4.03702	1.56006	2.40014	3.25902	1.52878	2.58607
NSD2	NM_133331	7706	8.93308	26.2361	13.1364	5.12681	8.23344	3.15397	2.93663	1.99706	1.60564	2.60967
NSD3	NM_023034	10767	3.05747	5.62004	2.79634	3.15574	10.1605	0.372884	1.83753	2.00906	3.21867	27.1756
NTSR1	NM_002531	4133	28.1257	166.867	46.5477	44.2359	174.247	89.2131	5.93269	3.58478	3.93895	1.95313
NUAK1	NM_014840	6821	0.83111	3.98455	2.22607	0.418682	3.63978	0	4.7885	1.78915	8.6727	3639.78
NUBPL	NM_025152	3039	0.662005	1.24742	0.661994	0.311311	0.902037	0	1.88146	1.88149	2.88827	902.037
NUP188	NM_015354	5689	8.1057	16.8292	5.15474	4.68054	11.6252	2.13389	2.07596	3.26417	2.48321	5.44536
NUP214	NM_005085	7568	2.77056	6.39953	3.32981	1.94151	4.71861	0.532988	2.30899	1.92131	2.42912	8.83654
NUP85	NM_024844	2133	5.31215	9.48403	2.99859	2.21575	14.0088	3.42856	1.78501	3.16178	6.31955	4.08472
OBSCN	NM_001271223	26925	1.90994	7.34944	2.36855	3.74785	15.573	4.81433	3.84598	3.10162	4.15409	3.23405
OFD1	NM_003611	3612	0.443626	1.95892	0.831703	0.521455	1.5111	0	4.40577	2.35248	2.89231	1511.1
OGDHL	NM_018245	3706	3.32639	6.78941	1.9403	4.17084	11.3304	2.21841	2.04046	3.49736	2.71592	5.10514
ORAI1	NM_032790	1496	2.97741	5.41844	2.02994	7.95445	35.0354	18.9546	1.81924	2.66795	4.40395	1.84829
ORC1	NM_004153	3121	2.04445	3.91213	1.91653	0.751015	1.74094	0	1.9126	2.04019	2.31504	1740.94
OSBPL5	NM_020896	3854	2.08346	7.6057	3.38554	4.65331	9.9357	1.04209	3.64877	2.24586	2.13473	9.52522
OVOL1	NM_004561	2988	2.41183	6.78478	2.34478	5.04032	29.2106	4.02136	2.81196	2.89233	5.79423	7.26205
PALD1	NM_014431	4610	5.05162	11.7929	5.98183	7.29256	15.6977	4.43294	2.33401	1.97112	2.15227	3.54036
PALM	NM_002579	2891	3.52238	8.95917	4.57881	7.94978	12.4779	4.22839	2.54278	1.95623	1.56939	2.95028
PANX1	NM_015368	2852	3.51093	8.78549	1.8285	2.92333	6.97612	1.46343	2.50161	4.80212	2.38555	4.76371
PAPLN	NM_001365906	5888	2.08261	3.35155	1.21473	2.04005	4.25634	1.38888	1.60853	2.75682	2.08536	3.06237
PARVB	NM_001003828	1878	1.72489	3.3007	2.15604	1.26729	4.40667	0	1.91246	1.5302	3.4745	4406.67
PAX2	NM_003990	4239	1.18314	4.64402	2.34155	1.62254	2.68671	0	3.92184	1.98246	1.65484	2686.71
PAXIP1	NM_007349	3864	3.27262	7.96421	2.18165	1.79524	9.66094	1.09124	2.43284	3.64887	5.37843	8.84507
PC	NM_000920	4117	1.11242	1.90535	0.758443	1.30765	4.82269	1.01164	1.71126	2.50887	3.68523	4.7625
PCNT	NM_006031	10526	3.29773	7.67613	3.06746	1.5775	5.22453	2.68522	2.327	2.50162	3.3098	1.94494
PCNX1	NM_014982	12865	5.39102	11.737	4.46632	4.45821	10.4629	2.19487	2.17674	2.6273	2.34635	4.76479
PCNX2	NM_014801	7530	2.73232	11.6811	2.96986	3.84033	8.90255	2.9711	4.27359	3.93189	2.31757	2.99538
PCNX3	NM_032223	6566	8.20221	35.7295	9.55853	7.17687	26.8884	6.16944	4.35555	3.73757	3.74601	4.35761
PCNX4	NM_001330177	18069	3.98509	6.83509	2.16573	2.03677	4.13134	0	1.71474	3.15457	2.02738	4131.34
PCSK5	NM_001372043	10226	0.424545	0.849832	0.318306	0.349267	0.867637	0.42466	1.99705	2.66149	2.47707	2.03833
PCYT2	NM_001184917	5143	3.95295	6.25485	3.08811	3.485	15.1478	7.41462	1.58193	2.02481	4.34531	2.04268
PDCD11	NM_014976	6477	8.45705	20.5119	10.5709	9.42196	19.7778	8.2078	2.42513	1.94023	2.0989	2.40935
PDE2A	NM_002599	4284	1.59488	5.74486	1.40717	7.60971	22.3703	4.69278	3.5998	4.07967	2.93932	4.76594
PDE4A	NM_001111307	4897	4.74496	11.1748	5.08367	5.57769	10.3901	6.78106	2.35459	2.19775	1.86246	1.532
PDIA5	NM_006810	1844	4.13189	9.21897	3.26186	6.64651	10.3706	2.17549	2.23064	2.82543	1.56007	4.76481
PDZD8	NM_173791	9672	8.86803	15.4432	5.93256	8.22197	26.3775	1.24948	1.74125	2.60268	3.20779	21.094
PER1	NM_002616	4676	4.21356	18.7835	7.7388	9.35006	14.0594	1.72044	4.45681	2.42687	1.50351	8.16723
PER2	NM_022817	6380	1.21308	2.70668	0.319229	1.2759	2.17479	0.638685	2.22941	8.45232	1.70318	3.39979
PEX6	NM_000287	3443	3.12548	10.6325	6.65593	5.85126	19.7154	9.26436	3.40077	1.5972	3.36885	2.12786
PFAS	NM_012393	5369	2.63182	10.7142	3.19552	3.35887	17.9295	0.752205	4.06949	3.35184	5.33635	23.8042
PGAP3	NM_033419	2687	1.19977	3.35545	1.12474	2.99698	6.13016	1.50019	2.79443	2.98065	2.04476	4.08354
PHC2	NM_198040	3873	16.1011	58.2339	27.9666	15.4855	48.4335	12.551	3.61655	2.08219	3.12746	3.85862
PHF12	NM_001033561	4505	3.80046	12.7865	2.4883	3.72281	8.01375	1.81043	3.36356	5.13656	2.15203	4.42399
PHLDB1	NM_001144758	5445	2.51275	4.87346	1.66271	3.38814	9.06265	2.21799	1.93872	2.92926	2.67402	4.08413
PHLDB3	NM_198850	2489	1.30145	2.87356	0.40668	2.86859	7.75807	0	2.20628	7.04858	2.70355	7758.07
PI4KA	NM_058004	6751	4.13808	10.8284	4.79755	3.94777	11.4396	3.59967	2.61613	2.25659	2.89699	3.17706
PIAS4	NM_015897	3069	4.16674	7.73152	4.10337	4.30427	7.74157	2.52622	1.85508	1.88373	1.79816	3.06327
PICK1	NM_001039583	2109	4.77032	7.77784	5.04537	6.90161	16.249	5.50639	1.63012	1.54128	2.35403	2.95039
PIEZO1	NM_001142864	8089	11.764	51.5793	14.0161	18.6145	109.47	12.0188	4.38412	3.67974	5.8806	9.10749
PIGG	NM_001127178	3909	3.1148	6.02578	1.1124	3.53062	6.06281	0	1.93395	5.41206	1.71672	6062.81
PIGW	NM_001346754	2816	1.61778	3.23852	0.404372	1.14101	5.51051	0	2.00059	7.98899	4.82527	5510.51
PIK3C2B	NM_002646	8452	2.18277	6.51982	2.66182	2.44063	6.16563	1.06514	2.98558	2.44846	2.52521	5.78311
PIK3CD	NM_005026	5412	2.01688	3.51681	0.581696	1.55013	3.17077	0.776016	1.74282	6.0354	2.04417	4.0807
PIKFYVE	NM_015040	9908	3.72168	6.06812	1.63583	1.49028	2.78613	0.409085	1.63004	3.70723	1.86828	6.79402
PIM3	NM_001001852	2102	15.8295	45.2977	14.0417	21.4089	64.935	33.2038	2.86142	3.22571	3.03295	1.95559
PIP5K1C	NM_001300849	3011	5.01982	16.232	5.17897	5.24513	23.8838	2.39125	3.23294	3.13361	4.55265	9.98384
PITPNM2	NM_020845	6736	1.68317	4.9787	2.2541	1.27196	11.0572	3.60819	2.95618	2.20775	8.68626	3.06364
PITX1	NM_002653	2337	2.71875	10.2049	5.52231	5.59287	18.5217	1.69988	3.75214	1.8476	3.31108	10.8895
PKD1	NM_001009944	14140	2.56338	24.9016	3.10265	4.20843	57.7549	5.73045	9.71056	8.02332	13.7204	10.0769
PKMYT1	NM_004203	2061	6.71461	15.3745	7.46041	4.16565	16.5184	0	2.28937	2.06053	3.96443	16518.4
PKN1	NM_213560	2936	10.3053	27.5062	4.4654	14.8597	29.954	17.8694	2.66886	6.15846	2.01565	1.67618
PKN3	NM_013355	3393	4.05404	9.969	6.25964	2.38275	7.31068	1.19278	2.45843	1.59233	3.06688	6.12395
PLA2G4B	NM_001114633	2735	2.81305	7.14801	1.48031	3.30668	12.1034	0	2.54011	4.82545	3.65919	12103.4
PLA2G6	NM_003560	3299	1.71836	4.48058	0.920538	1.29853	5.85326	2.45576	2.60596	4.86207	4.50414	2.38251
PLCD3	NM_133373	6132	8.05422	34.0885	10.7969	12.2807	26.2419	14.0127	4.23186	3.15696	2.13667	1.87258
PLCG1	NM_002660	7092	6.37928	14.1995	4.27862	3.84084	7.4198	1.55646	2.22553	3.31793	1.93131	4.76403
PLEC	NM_201380	15299	19.6427	62.0924	28.3016	50.9383	176.762	31.3341	3.16093	2.19388	3.47006	5.64104
PLEKHG1	NM_001329798	7220	0.836114	1.31277	0.836087	1.17941	2.65829	0.55763	1.56822	1.56826	2.25202	4.75859
PLEKHG5	NM_001265592	4794	6.33492	28.2476	10.3467	11.0211	33.95	20.2796	4.45832	2.72983	3.08016	1.67401
PLEKHH3	NM_024927	3025	4.89456	22.7431	10.9132	11.6627	27.9373	5.29347	4.64566	2.08381	2.39522	5.27669
PLEKHM1	NM_014798	5240	0.916935	2.47453	0.381991	1.16773	4.16467	1.52891	2.69576	6.46107	3.56342	2.72216
PLEKHM2	NM_015164	4134	3.51178	12.6357	4.14571	4.58682	13.9557	6.8311	3.59707	3.04716	3.04191	2.04267
PLEKHO2	NM_025201	3689	1.41467	3.9725	1.36021	2.30253	4.44813	0	2.8061	2.91835	1.931	4448.13
PLK3	NM_004073	2340	4.86496	11.0756	5.67563	13.5345	43.0855	8.11145	2.27615	1.95109	3.18314	5.31104
PLOD3	NM_001084	2821	5.57683	9.28986	2.7202	6.60877	19.4592	5.44284	1.6655	3.41389	2.94401	3.57454
PLXNA1	NM_032242	9066	6.32008	19.355	8.59761	7.35044	22.8207	10.2768	3.06198	2.25095	3.10425	2.22038
PLXNA3	NM_017514	10885	6.47698	16.737	10.4946	7.26117	18.3851	5.39951	2.58368	1.59466	2.53162	3.40432
PLXNB2	NM_001376864	6611	14.4459	45.914	15.1803	16.0043	32.6588	14.0677	3.17813	3.02438	2.0405	2.32138
PLXND1	NM_015103	6977	4.4109	15.3771	4.933	6.07191	34.3982	16.2568	3.48537	3.11656	5.6642	2.11579
PNPLA2	NM_020376	2414	7.67479	12.7704	6.67347	16.0823	38.6451	11.6836	1.66373	1.91332	2.40282	3.30736
PNPLA6	NM_001166111	4535	7.17239	22.3138	4.86989	9.47203	19.3034	4.42906	3.11064	4.58106	2.03772	4.35737
POFUT1	NM_015352	5226	2.71552	6.30407	3.29728	2.5537	7.39983	0.776155	2.32064	1.91132	2.89656	9.52169
POLE	NM_006231	7823	6.22188	15.785	6.95509	3.4488	6.20293	3.03623	2.53661	2.26924	1.79806	2.0423
POLG	NM_002693	4448	5.64425	16.8305	6.59986	4.60156	10.5431	5.46423	2.98135	2.54974	2.29069	1.92912
POLL	NM_013274	2731	4.44813	7.85689	4.81866	5.22878	19.1918	1.48316	1.76594	1.63017	3.66972	12.9311
POLR2A	NM_000937	6747	18.6901	45.0077	16.3756	13.9874	22.9268	9.01794	2.40798	2.74829	1.63898	2.54207
POLRMT	NM_005035	3771	1.65162	4.58003	0.532779	2.37998	5.08157	1.06598	2.77137	8.58037	2.13424	4.7626
POM121C	NM_001099415	5867	0.345419	2.27791	1.03625	0.0811671	0.941289	0.230154	6.57559	2.1961	11.4558	4.07213
POMGNT1	NM_001243766	2936	3.99967	10.0693	2.41343	2.91822	17.8519	5.51885	2.51689	4.17045	6.11528	3.23412
POMGNT2	NM_032806	2547	2.85156	11.3797	0.39595	2.42093	24.8229	6.33937	3.98929	28.6678	10.2492	3.91505
PPA2	NM_176869	1665	3.14651	5.70017	0.605001	2.56063	4.94662	0	1.81101	9.40621	1.93104	4946.62
PPARA	NM_001362873	10375	1.45063	3.17914	1.61172	1.56312	5.21571	0.403063	2.19006	1.97129	3.33459	12.9082
PPP1R15B	NM_032833	5276	13.4312	22.9556	13.4307	8.5708	21.9599	9.98127	1.709	1.70906	2.56188	2.19989
PPP1R16A	NM_032902	2961	7.48584	25.3024	9.35698	9.28853	39.6646	18.0285	3.37958	2.70383	4.26982	2.19999
PPP1R26	NM_014811	4951	3.07884	10.3446	3.07865	2.8953	15.3814	3.28535	3.35883	3.35903	5.3107	4.68038
PPP1R3B	NM_024607	5509	2.40199	3.8571	1.09175	1.28342	8.42996	0	1.60512	3.52973	6.56325	8429.96
PPP2CB	NM_001009552	1943	4.72757	7.98742	3.08304	7.7319	21.0044	10.2813	1.68918	2.58992	2.71624	2.04277
PPP2R3C	NM_017917	2067	0.783533	1.38412	0	0.460507	10.6766	3.91954	1.76425	1384.12	23.1342	2.72324
PPP6R1	NM_014931	3984	8.7956	32.2518	8.07153	11.5825	35.6484	15.5931	3.66639	3.99526	3.07751	2.28602
PPRC1	NM_015062	5328	9.56947	22.0934	13.7509	7.26307	14.8862	3.01512	2.30849	1.60657	2.04929	4.93554
PRAG1	NM_001369759	5316	3.68419	11.9055	6.42589	6.24454	39.1081	11.1428	3.23064	1.85246	6.26176	3.50939
PRDM16	NM_022114	8698	0.974773	1.9678	0.348072	1.09123	10.436	4.64385	2.01666	5.63724	9.55472	2.24678
PREX1	NM_020820	6751	1.15991	2.01276	0.457789	1.6505	9.98125	1.83209	1.73379	4.38713	6.04377	5.44503
PRH1	NM_001291315	1036	1.92453	5.4391	0.962187	1.35736	5.24444	0	2.82473	5.64699	3.86086	5244.44
PRKD2	NM_001079881	3186	7.75892	20.392	5.06002	10.046	19.1515	0	2.62786	4.02922	1.90618	19151.5
PRKDC	NM_006904	13457	21.597	43.7154	18.4338	10.7116	25.9338	9.89551	2.02405	2.37135	2.42087	2.6205
PRKRIP1	NM_024653	2159	3.34191	6.34015	4.17721	3.27369	6.32409	0	1.8966	1.51743	1.9312	6324.09
PROM2	NM_144707	3822	2.73537	7.04622	3.84656	2.81355	6.98816	1.71027	2.57502	1.83135	2.48287	4.08361
PRR12	NM_020719	7416	4.19193	15.0144	6.69516	4.53974	10.7091	6.40679	3.58089	2.24224	2.35845	1.67126
PRRC2B	NM_013318	11059	11.9367	41.2196	18.307	12.3099	41.6568	10.2563	3.4529	2.25145	3.38373	4.06119
PRRT4	NM_001174164	3545	0.799562	3.22809	1.99879	1.34269	3.11262	1.14267	4.03228	1.61422	2.31647	2.7216
PSMB10	NM_002801	976	0.804989	6.16176	3.01866	1.89261	5.48424	0	7.64496	2.04055	2.89618	5484.24
PSME4	NM_014614	7250	5.41884	11.0827	3.56482	4.69353	10.1032	0.570574	2.04484	3.10804	2.15211	17.6761
PTCH1	NM_000264	8662	1.22317	3.06075	1.27403	0.838751	5.20809	1.52947	2.50026	2.40053	6.20194	3.40294
PTPRF	NM_001329138	6917	15.6305	31.0211	16.391	18.7178	31.3067	15.8122	1.98452	1.89245	1.67247	1.97979
PTPRS	NM_002850	7356	11.8498	25.6359	10.8848	15.3547	34.3555	14.3354	2.16323	2.35498	2.23732	2.39638
PUF60	NM_001362896	2205	9.81524	18.4436	10.4413	9.8194	19.9175	12.5349	1.87888	1.76623	2.02818	1.58884
PUM1	NM_001020658	5385	9.54988	16.4698	8.27123	5.6571	12.2945	6.01799	1.72443	1.99097	2.1729	2.04262
PWWP2B	NM_001098637	2307	0.526059	9.49935	5.26088	2.6799	5.97353	1.75436	18.0233	1.80532	2.22818	3.40302
PXN	NM_001080855	3744	21.8853	46.6394	19.2156	23.4672	85.8192	23.4956	2.13098	2.42704	3.65683	3.65241
PYGB	NM_002862	4116	6.46951	12.2737	7.35139	17.2837	26.711	13.7284	1.89686	1.66934	1.54535	1.94554
RAB11FIP3	NM_001370401	4936	1.99984	3.13998	0.476133	2.01502	11.029	6.66885	1.56933	6.58094	5.4707	1.65356
RAB43	NM_001204886	4230	0.271044	0.74486	0	1.38086	11.6966	0	2.73802	744.86	8.46438	11696.6
RABL6	NM_001173988	3107	5.0406	19.3034	9.04686	6.98877	16.7293	7.75774	3.82882	2.13347	2.3934	2.15619
RAD51	NM_001164269	2335	0.377137	3.10925	1.88596	0.443354	2.56971	0	8.22254	1.64776	5.78302	2569.71
RAD9A	NM_004584	2086	10.4954	18.6506	11.926	10.5427	20.7998	5.72692	1.77686	1.56372	1.97272	3.63131
RADIL	NM_018059	5736	1.21367	3.63791	0.275735	0.778168	1.50329	0	2.99497	13.1459	1.92935	1503.29
RAI1	NM_030665	7675	4.33475	12.8233	5.28603	5.96549	14.045	2.6441	2.95757	2.42542	2.35398	5.30981
RALGAPA2	NM_020343	9545	2.44855	5.66564	2.57737	2.52487	5.85307	1.71899	2.31293	2.19737	2.31725	3.40297
RALGPS1	NM_001322325	2931	0.629693	1.48301	0.787055	1.4805	4.29011	0	2.3514	1.88186	2.89579	4290.11
RANBP10	NM_020850	5245	2.65345	6.4279	2.84295	1.78239	5.68138	3.03367	2.42156	2.2602	3.18571	1.87216
RAP1GAP2	NM_015085	6663	6.01656	12.1658	6.38089	6.14374	16.5606	4.25573	2.02171	1.9063	2.69508	3.89044
RAP2B	NM_002886	8401	3.99493	8.04806	3.97069	5.0355	10.1647	4.33347	2.01407	2.02636	2.0182	2.34508
RAPGEF1	NM_001377935	6760	3.34488	11.5847	5.41063	3.85478	19.6595	1.96832	3.46239	2.14071	5.0987	9.98288
RAPGEF6	NM_001164386	8374	3.28543	5.06355	3.01958	2.10129	4.60803	0.966646	1.54074	1.67635	2.19191	4.76211
RARG	NM_000966	2917	4.36731	11.8926	7.50598	7.86102	23.2439	5.46119	2.72246	1.5842	2.95647	4.25541
RASA3	NM_007368	4203	2.6012	5.21865	2.64924	3.85055	10.5014	3.85516	2.00547	1.96912	2.72653	2.72327
RASAL1	NM_001193520	3832	2.4304	5.84829	2.90583	1.98743	17.2771	2.11416	2.40532	2.01192	8.68884	8.16823
RASD2	NM_001366725	2830	1.36243	2.88789	1.02172	1.28123	3.71274	0	2.11811	2.82374	2.89553	3712.74
RASSF7	NM_003475	2017	1.84413	8.9967	4.61019	4.02595	16.153	5.27111	4.87592	1.95106	4.01123	3.06386
RBM19	NM_001146699	4443	2.21906	5.56683	2.65305	1.47429	7.88723	0.965054	2.50751	2.09748	5.34622	8.16438
RBM38	NM_001291780	2486	5.21649	13.0532	4.48271	7.56913	14.437	0	2.50182	2.91126	1.9071	14437
RDH10	NM_172037	3959	2.45211	3.85021	2.04344	2.76253	6.26474	0	1.56952	1.88326	2.26693	6264.74
RELB	NM_006509	2254	0.533946	2.72463	0.444867	4.18456	12.1256	1.78059	5.09328	6.11085	2.89701	6.80605
REPIN1	NM_001362745	3222	7.60762	22.2831	6.71235	6.61315	11.3235	6.39537	2.92866	3.31922	1.71201	1.7703
REPS1	NM_001286611	4019	3.72787	6.0508	3.77814	3.78996	19.9051	2.0158	1.62269	1.6011	5.25067	9.86965
REV3L	NM_002912	10836	2.16733	4.66442	2.52222	1.9767	4.58233	0.747636	2.15116	1.8486	2.317	6.1209
REXO1	NM_020695	4609	2.65166	14.4683	4.19843	6.13045	9.63486	2.65283	5.45424	3.44529	1.57138	3.63055
RGL2	NM_004761	2896	5.21004	11.4141	5.14908	4.84251	23.9374	0	2.19037	2.2163	4.94216	23937.4
RGMA	NM_001166283	3200	1.77154	4.91724	2.2143	1.48743	8.62054	3.79764	2.77413	2.21967	5.7917	2.26938
RGS16	NM_002928	2408	0.332953	1.17635	0	1.76137	18.1485	0	3.5225	1176.35	10.2978	18148.5
RHBDF1	NM_022450	2992	1.4887	3.42634	0.338265	3.1818	6.45382	1.35386	2.30001	10.0993	2.02772	4.76346
RHBDF2	NM_024599	3605	6.73945	16.4013	3.36962	7.52613	32.1388	3.37097	2.43326	4.86595	4.26972	9.53115
RHOF	NM_019034	2435	10.9756	27.611	14.1346	15.443	39.651	16.636	2.51545	1.9533	2.56741	2.3833
RHOT2	NM_001352275	2493	9.2282	22.4831	12.7282	12.3441	32.5176	7.95848	2.43608	1.76626	2.63405	4.0854
RHPN1	NM_052924	3695	9.15595	13.9904	7.62954	17.4255	36.385	5.45198	1.52784	1.83347	2.08792	6.67251
RIC1	NM_020829	6785	4.66329	8.80009	4.18482	2.45969	4.4802	1.79423	1.88669	2.10236	1.82071	2.49561
RIC8A	NM_021932	3783	4.70976	8.57102	4.81659	2.51647	8.02124	2.14157	1.81945	1.77911	3.18623	3.74374
RIN3	NM_024832	3852	2.41777	5.3228	2.10227	2.47136	7.16142	1.05158	2.20063	2.53072	2.89659	6.8037
RIPOR1	NM_001193523	4477	3.82819	11.9461	2.63171	4.50003	14.3438	2.87225	3.11973	4.53755	3.18679	4.99219
RNF223	NM_001205252	1900	2.16538	7.64957	0.902195	3.81814	12.293	0	3.53104	8.46946	3.21879	12293
RNF40	NM_001286572	5347	4.37291	6.97134	4.20455	4.42857	10.9995	2.01899	1.59385	1.65765	2.48319	5.44532
RNF43	NM_001305544	5495	17.8979	72.4318	19.1756	8.84488	43.2972	5.84646	4.04672	3.7771	4.89461	7.40444
RNPEPL1	NM_018226	5761	4.83019	16.7474	4.6958	7.25504	20.1089	5.36892	3.46652	3.56572	2.77134	3.74474
RPAP1	NM_015540	4663	3.89104	8.85837	2.37778	4.06573	12.3703	0	2.27603	3.72392	3.04182	12370.3
RPS6KA2	NM_001318936	6030	1.00293	1.81089	1.17008	1.88633	12.2988	0.668865	1.8038	1.54634	6.51647	18.36
RPSA	NM_001304288	1154	1.36684	4.02381	0	0.80335	2.32789	0	2.94173	4023.81	2.89413	2327.89
RPTOR	NM_020761	6838	6.20152	22.3947	5.61068	5.83192	19.3132	7.68105	3.61058	3.99072	3.31108	2.51408
RRP12	NM_015179	4396	3.38508	8.07988	1.82966	7.20555	19.9446	4.57615	2.38621	4.41366	2.76756	4.35742
RRS1	NM_015169	1720	4.03504	7.82598	2.96674	5.02222	11.3189	7.12342	1.93902	2.63701	2.25332	1.58875
RTL6	NM_032287	5419	5.59023	13.6134	6.84491	3.12917	13.4716	1.52171	2.43477	1.98854	4.30381	8.84713
RTTN	NM_173630	7808	4.79474	12.7037	2.42566	1.14065	5.05518	0.570989	2.64895	5.23506	4.42797	8.83789
RYR1	NM_000540	15400	0.368317	1.88966	0.197283	0.974151	2.50922	0.526343	5.11664	9.53013	2.57316	4.75824
SAC3D1	NM_001367485	1359	3.61762	8.52016	3.23002	4.25266	7.04159	2.58506	2.35454	2.63699	1.65542	2.7229
SAP30	NM_003864	1097	1.09537	2.36466	0	1.71685	9.94975	0	2.15681	2364.66	5.792	9949.75
SARS2	NM_001145901	1930	3.13744	5.07995	1.47062	3.91858	14.6946	0	1.61862	3.45194	3.74902	14694.6
SBF1	NM_002972	8018	5.32937	19.0636	5.78154	7.74219	40.245	7.04146	3.57642	3.29675	5.19746	5.71462
SBF2	NM_030962	7439	3.10267	6.53804	1.90499	2.75136	18.1705	1.63357	2.10655	3.43026	6.60178	11.1163
SBNO2	NM_014963	4906	3.53544	14.8131	3.28863	8.02182	35.2874	2.46753	4.1887	4.50297	4.39837	14.2949
SCAF1	NM_021228	4222	6.57204	15.5884	6.10227	11.9744	28.1422	7.51374	2.37157	2.55411	2.35	3.74493
SCAP	NM_012235	4254	5.5028	16.8699	9.25003	8.69904	32.9633	18.9825	3.06514	1.82357	3.78887	1.73642
SCARA3	NM_016240	3787	1.78426	5.77813	3.06665	1.83524	3.0389	1.11561	3.23658	1.88357	1.65496	2.72155
SCARB1	NM_001367981	3526	8.86065	13.564	8.49113	10.9365	27.1632	5.90931	1.53064	1.59725	2.4835	4.59591
SCN5A	NM_198056	8504	1.33325	3.30813	2.02359	0.671673	3.24386	0	2.47939	1.63398	4.82234	3243.86
SCN8A	NM_014191	11559	1.2264	1.85667	0.87589	0.885539	2.62584	1.05158	1.51269	2.11733	2.9619	2.49468
SDF4	NM_016176	1933	10.1133	17.9223	8.51086	18.1265	35.4713	12.0203	1.77199	2.10557	1.95677	2.9507
SDHA	NM_004168	2693	1.3062	3.24722	1.45124	1.19415	3.95493	1.45187	2.4841	2.23601	3.30915	2.72214
SDSL	NM_001304993	1306	1.42781	3.69892	0.713795	2.34976	7.78157	0	2.58881	5.1748	3.31024	7781.57
SEC16A	NM_014866	9018	6.76227	20.8303	7.27697	7.15942	23.7965	6.72001	3.07991	2.8621	3.32334	3.54062
SEMA3F	NM_004186	3607	2.30073	7.3149	1.72548	2.97494	11.7553	6.90482	3.178	4.2369	3.95011	1.70223
SEMA4B	NM_001324031	3777	5.00447	10.2488	3.53563	6.13856	12.5996	4.3534	2.04753	2.89791	2.0522	2.89353
SEMA4F	NM_004263	6075	2.25434	4.52854	2.98359	1.87057	5.42048	1.32659	2.00792	1.51731	2.89622	4.08296
SEMA6B	NM_032108	3862	8.6287	57.9403	23.3683	16.6635	130.861	25.6904	6.71406	2.47933	7.85269	5.09357
SEMA6C	NM_001178061	3989	2.81899	7.58748	2.01344	4.14215	11.6598	7.05018	2.69061	3.76655	2.81424	1.6536
SEMA7A	NM_003612	3376	1.43672	7.04948	2.39451	4.64456	28.5483	8.38438	4.90324	2.94279	6.14529	3.40453
SENP2	NM_021627	5596	3.80335	7.01657	4.1201	3.87471	6.04561	1.26823	1.84436	1.7026	1.55987	4.76319
SEPHS2	NM_012248	2244	3.27245	12.5748	1.72213	17.6145	37.5477	0	3.84144	7.29764	2.13151	37547.7
SETD1A	NM_014712	5989	3.20223	9.9816	3.13934	2.80472	7.2718	1.25626	3.1161	3.17851	2.59178	5.78386
SETD1B	NM_001353345	8332	2.28403	13.7062	3.28032	2.62786	9.93243	0.486126	5.99826	4.17703	3.77823	20.3898
SETD5	NM_001080517	6931	11.9185	33.1537	9.46335	8.23919	17.7297	7.39635	2.78148	3.50301	2.15161	2.39676
SFI1	NM_001007467	4031	2.67431	5.42959	3.45799	3.90245	22.6165	2.76759	2.02952	1.5697	5.79397	8.16894
SGSM2	NM_014853	4878	6.07355	18.3206	8.11156	6.55264	18.1373	3.32924	3.01597	2.25831	2.76752	5.44626
SH2B2	NM_020979	2127	2.38622	6.26836	0.458827	2.15772	15.0059	3.67256	2.6258	13.632	6.95129	4.08483
SH2B3	NM_005475	5431	6.89117	14.1566	8.0518	7.66029	14.7981	2.99726	2.05401	1.75797	1.93155	4.93558
SH3BP4	NM_001371304	5110	2.96876	10.4877	2.34363	3.94901	15.4348	3.90784	3.5315	4.47307	3.90753	3.94869
SH3BP5L	NM_030645	3148	3.55647	7.77757	4.12783	3.43406	5.19177	1.27066	2.18626	1.88372	1.51141	4.08268
SH3PXD2B	NM_001017995	7779	5.15466	11.8333	7.41934	3.61113	5.67533	1.04168	2.2952	1.59471	1.57118	5.44302
SH3RF1	NM_020870	5120	5.76824	11.6829	4.80667	4.33952	8.90709	5.38574	2.02503	2.43006	2.05208	1.65352
SH3TC1	NM_018986	4303	0.55854	4.49518	0.232702	2.73618	12.0517	0.931413	8.03371	19.2347	4.40297	12.9253
SHANK2	NM_012309	10675	1.6311	3.08206	1.1379	2.31866	9.81977	4.93311	1.8884	2.70618	4.23327	1.99018
SHC1	NM_001130040	3481	7.48364	25.0674	10.905	11.3495	34.0761	11.6371	3.34918	2.29849	3.00216	2.92799
SHISA5	NM_016479	2187	6.29523	13.7357	4.16579	6.0941	26.4884	1.85224	2.18158	3.29648	4.34585	14.2931
SHROOM3	NM_020859	10890	1.9476	5.66872	1.10236	1.59831	7.26002	1.10287	2.90913	5.13768	4.53948	6.57689
SIAH2	NM_005067	2311	4.59341	11.4422	5.74151	9.96852	30.0892	8.83694	2.49047	1.99255	3.01812	3.40455
SIL1	NM_022464	1889	1.49184	5.01922	2.13112	3.00625	5.80745	2.13202	3.36219	2.3541	1.93115	2.72264
SIPA1L2	NM_020808	6913	1.53399	3.25157	0.460096	3.02946	9.61469	5.52473	2.1183	7.05183	3.17268	1.73999
SIPA1L3	NM_015073	8003	4.35629	13.1822	3.03908	5.71622	20.7048	4.05389	3.02533	4.33614	3.62148	5.10614
SIRT2	NM_012237	1862	2.93144	4.60251	0.488477	2.29728	3.99405	1.95496	1.56951	9.4029	1.73785	2.04199
SLC10A3	NM_001142392	1860	1.10088	4.40779	1.10086	0.776489	1.49995	0	4.00024	4.00031	1.92922	1499.95
SLC12A4	NM_005072	4708	6.0336	14.8102	7.01058	7.49205	25.7621	6.80099	2.45421	2.11225	3.43814	3.78744
SLC16A5	NM_001369668	3044	8.23113	25.2953	14.0525	9.43962	31.4563	10.0418	3.07275	1.79992	3.33201	3.13223
SLC1A5	NM_005628	2882	24.6652	59.0293	28.0114	40.2601	79.6945	45.1193	2.39312	2.10725	1.97944	1.76627
SLC25A22	NM_024698	2771	5.70108	24.1317	9.62983	12.4976	18.8944	6.1657	4.23209	2.50567	1.51172	3.06394
SLC25A39	NM_001143780	1581	33.5168	98.377	22.654	30.3517	76.1104	7.45096	2.93507	4.3424	2.50753	10.2135
SLC29A2	NM_001300868	2716	10.7345	18.6096	12.2995	9.98961	27.4232	2.98293	1.73346	1.51292	2.7449	9.19029
SLC2A1	NM_006516	3362	29.57	49.3718	21.5146	25.6805	57.8775	30.9057	1.66961	2.2947	2.25367	1.87265
SLC2A4RG	NM_020062	2361	10.3054	18.4119	10.6603	12.114	19.3669	3.55489	1.78645	1.72698	1.59859	5.44644
SLC35A2	NM_001282651	2820	3.74517	5.99777	2.24695	2.64144	13.2673	1.4986	1.60104	2.66811	5.02085	8.84723
SLC35B3	NM_015948	2222	1.27558	2.78971	0.455481	1.07108	8.69035	0	2.1853	6.11134	8.10603	8690.35
SLC35E2B	NM_001290264	6434	2.19964	3.99634	2.19953	0.81262	5.13777	0	1.81599	1.81608	6.31471	5137.77
SLC37A3	NM_207113	3330	4.2306	9.96356	3.32393	2.69968	18.116	2.41838	2.35456	2.99662	6.70795	7.48788
SLC38A10	NM_001037984	4491	9.48983	32.892	9.84753	12.7339	43.3029	5.37362	3.46566	3.33978	3.40034	8.05693
SLC45A1	NM_001080397	2496	2.08312	4.52863	1.60226	4.70908	25.1078	6.41212	2.17292	2.82464	5.33065	3.91507
SLC45A3	NM_033102	3391	3.47217	9.30527	3.89109	3.23705	6.52533	0	2.67918	2.39082	2.0152	6525.33
SLC52A2	NM_001253815	1747	10.2774	32.8105	11.4189	15.437	33.4515	20.5627	3.19217	2.8731	2.16683	1.62672
SLC52A3	NM_001370085	2624	3.75628	6.19258	2.25364	2.29604	15.3538	0	1.64816	2.74659	6.6842	15353.8
SLC6A8	NM_005629	3930	3.86186	9.09515	4.82709	4.18354	20.1186	6.81761	2.35451	1.8838	4.80785	2.95055
SLC7A1	NM_003045	7343	10.5326	27.0135	12.1314	13.0943	25.1702	12.1365	2.5645	2.22656	1.92209	2.07375
SLC7A5	NM_003486	4556	46.5828	205.439	57.189	89.9744	489.338	128.952	4.4101	3.59223	5.43857	3.7947
SLC8B1	NM_001358345	3510	3.34759	15.6104	4.68645	3.14807	5.47334	0	4.66179	3.33026	1.73808	5473.34
SLCO4A1	NM_016354	2716	14.5869	31.9489	15.6803	16.4609	49.6863	5.83698	2.19009	2.03739	3.01825	8.51087
SMAD7	NM_005904	3087	1.70522	7.25969	0	4.16317	21.4466	3.93663	4.25485	7259.69	5.15028	5.44658
SMG5	NM_015327	4559	9.76164	30.7227	12.4234	9.49276	25.9958	9.76537	3.14696	2.47277	2.7382	2.66177
SMG6	NM_017575	5974	3.39246	7.5902	3.73153	3.19026	8.32008	0	2.23672	2.03353	2.60714	8320.08
SMURF2	NM_022739	6240	12.6737	19.6109	11.5211	11.4505	19.9793	4.19122	1.54724	1.70202	1.74469	4.76581
SNAPC4	NM_003086	4658	3.99883	13.4101	7.38888	4.39405	17.7667	6.08748	3.35268	1.81466	4.04243	2.91808
SND1	NM_014390	3448	13.1335	25.3425	10.2084	14.141	46.6154	25.3938	1.92946	2.48227	3.29623	1.83563
SNX11	NM_013323	2315	2.8658	5.75683	2.10712	4.95411	8.03914	1.68639	2.0081	2.73079	1.62239	4.76425
SNX15	NM_013306	1908	0.62647	0.983629	0	0.981889	7.11341	2.0891	1.56761	983.629	7.23725	3.40338
SNX30	NM_001012994	7700	2.66184	4.3883	2.79484	2.12772	5.07754	1.06514	1.64798	1.56958	2.38526	4.76253
SNX8	NM_013321	4704	1.6238	6.34024	2.99109	1.60736	5.23997	2.56492	3.90216	2.119	3.25796	2.04214
SOCS3	NM_003955	2737	1.77535	3.48426	2.21903	2.95647	7.05519	1.47998	1.96147	1.56947	2.38555	4.76388
SORBS3	NM_005775	3227	5.70506	9.61901	3.88959	3.96281	7.06647	3.24271	1.68575	2.47238	1.78275	2.17851
SOWAHB	NM_001029870	3993	0.750798	1.64201	0	1.0086	5.11522	3.21911	2.18411	1642.01	5.06656	1.58852
SOX4	NM_003107	4868	65.6486	137.454	79.8612	32.5918	52.4984	24.913	2.09375	1.72114	1.61074	2.10718
SPATA13	NM_001286792	8605	2.44236	4.17836	1.61276	2.27516	4.08119	0.461	1.71009	2.58921	1.79301	8.83374
SPATA20	NM_022827	2634	3.42528	12.1004	3.72299	6.12717	11.1601	4.46948	3.53166	3.24931	1.82111	2.49639
SPEG	NM_005876	10782	1.78697	6.67111	3.23163	4.24595	16.0593	4.18395	3.73111	2.06368	3.78138	3.83739
SPEN	NM_015001	12385	5.26559	15.4042	6.6647	4.39908	9.47577	3.64432	2.92489	2.31097	2.15354	2.59943
SPG7	NM_001363850	3301	9.55709	17.5746	3.27282	11.3882	20.5132	1.30963	1.83872	5.36823	1.8011	15.6514
SPHK1	NM_182965	2179	0.370777	3.49324	0.926999	1.74356	5.05234	1.85473	9.39606	3.76427	2.89605	2.72257
SPHK2	NM_001204159	2894	1.50278	4.66533	2.7322	3.21179	8.37621	0	3.10239	1.70691	2.60714	8376.21
SPIRE1	NM_001128626	5638	4.1653	6.9194	2.0454	4.10945	7.09407	1.48814	1.6608	3.38126	1.72586	4.76386
SPIRE2	NM_032451	3268	2.6213	5.43847	2.49638	6.30943	10.2044	1.24871	2.07393	2.17767	1.61706	8.16535
SPOUT1	NM_016390	4259	3.77909	6.2301	2.59802	2.33217	9.01073	2.83529	1.64814	2.3971	3.86202	3.17695
SPPL2B	NM_152988	3691	7.12295	14.8691	4.3168	8.75364	33.8205	2.15929	2.0872	3.44367	3.86315	15.6555
SPRED2	NM_181784	4519	11.4861	22.8644	7.74826	11.0373	30.43	12.7672	1.99044	2.95053	2.75678	2.38327
SPRY2	NM_001318536	2031	0.299115	0.528391	0	1.05503	10.1905	2.99283	1.76063	528.391	9.64985	3.40383
SRCAP	NM_006662	11724	6.26301	33.1877	11.6944	5.08988	20.0164	6.18806	5.29815	2.83767	3.93181	3.23416
SREBF1	NM_001005291	4991	17.8134	54.4429	18.0152	21.13	84.9473	47.7907	3.05612	3.02189	4.02003	1.77745
SRGAP2	NM_015326	6884	3.28433	5.41445	1.79135	2.03567	4.06808	1.79215	1.64807	3.02086	1.99741	2.26867
SRXN1	NM_080725	2519	6.32466	15.0726	3.76453	20.4158	38.9833	10.5452	2.38277	4.00279	1.90937	3.69643
SSBP4	NM_032627	1725	4.07871	7.96032	2.26587	6.92548	40.136	9.06737	1.95119	3.51159	5.79457	4.42594
SSH1	NM_018984	13034	9.96314	17.8216	11.6232	10.4847	27.1494	4.74615	1.78858	1.53315	2.58918	5.7191
SSU72	NM_014188	1284	13.5184	28.1779	10.0995	10.5939	44.4591	6.21775	2.08425	2.78975	4.19627	7.1492
ST14	NM_021978	3305	10.0619	19.9401	11.3499	13.9913	34.2733	6.13767	1.98154	1.7567	2.44943	5.58318
ST3GAL1	NM_003033	6918	1.5256	3.05287	1.94433	1.33626	2.85304	1.49631	1.99979	1.56933	2.13349	1.90544
STEAP3	NM_182915	4258	3.59175	7.34608	3.30812	2.77771	5.15138	1.89114	2.04469	2.21995	1.85388	2.72252
STK10	NM_005990	5892	2.75827	4.75317	1.00903	3.63778	6.87462	0	1.72262	4.70598	1.88927	6874.62
STK11IP	NM_052902	3618	2.56991	6.97342	1.67575	2.62691	5.32836	0	2.71243	4.15889	2.02761	5328.36
STK32C	NM_001318878	2162	1.68173	4.40081	1.4014	3.95369	15.2759	3.73867	2.61529	3.13806	3.86274	4.08483
STK36	NM_015690	4873	4.10263	7.05338	1.02553	1.92903	4.47182	0.820801	1.71881	6.87112	2.31696	5.44148
STK40	NM_001282546	3660	5.1829	9.47941	4.1351	8.81474	19.5324	7.72223	1.82862	2.29187	2.21563	2.52904
STRN4	NM_001039877	3197	10.8486	25.4011	15.4523	14.087	54.1404	23.977	2.3412	1.64373	3.84301	2.25791
STX4	NM_004604	1410	3.28322	9.66542	3.4198	4.18098	24.2308	13.6853	2.94298	2.82548	5.79408	1.77044
SUFU	NM_016169	5016	6.30142	10.8895	4.91004	2.59735	10.5927	2.45604	1.72783	2.21736	4.07671	4.31118
SUGP2	NM_001321698	3606	6.73759	16.529	5.89518	3.56398	15.2999	8.98693	2.45288	2.80333	4.29172	1.70227
SUMF1	NM_182760	2147	2.06115	5.73679	3.74745	0.881014	10.2122	1.87452	2.78194	1.53044	11.5783	5.445
SURF6	NM_006753	4235	4.52633	7.7899	3.91682	6.13921	13.0457	3.48311	1.72064	1.98833	2.12464	3.74435
SYMPK	NM_004819	4077	9.86222	21.9742	5.31753	9.49028	28.3235	6.77067	2.22789	4.13163	2.98417	4.18265
SYNE3	NM_152592	13502	0.359837	1.27126	0.299847	1.40999	2.86009	0.299996	3.52308	4.22559	2.02702	9.5021
SYNE4	NM_001039876	1377	2.37316	6.63712	2.2248	2.09224	32.3349	5.93527	2.79557	2.9819	15.4473	5.44701
SYNJ1	NM_003895	7075	0.514949	1.4153	0.858469	0.403646	0.779808	0	2.7431	1.64671	1.92714	779.808
SYNRG	NM_007247	8141	2.13095	4.43499	2.35378	1.16495	2.36324	0.495679	2.08025	1.8834	2.02688	4.75809
SYVN1	NM_172230	3038	7.1668	12.3465	3.31781	7.95664	16.2748	9.29399	1.7225	3.72016	2.04518	1.75092
SZT2	NM_001365999	14136	3.04152	12.3479	3.11384	3.23479	9.07752	0.869324	4.05844	3.96421	2.80535	10.43
TAGLN	NM_003186	3786	0.838573	1.35774	0.262006	0.369632	9.28329	0	1.61717	5.16239	25.0472	9283.29
TANC1	NM_033394	7501	2.80491	5.46249	1.07871	2.47282	4.77707	1.61883	1.94678	5.05922	1.93105	2.94912
TANC2	NM_025185	12257	4.96376	10.0869	4.39479	3.62654	6.81011	3.79321	2.03171	2.29468	1.87734	1.79487
TAOK2	NM_004783	4659	7.55979	15.5531	6.95128	6.23082	13.6153	6.08499	2.05708	2.23713	2.1848	2.23715
TASP1	NM_017714	2342	1.72235	5.67887	2.58337	1.82217	11.7336	3.44608	3.29525	2.19739	6.43582	3.40393
TBC1D16	NM_019020	10960	6.95478	26.7905	12.4848	6.60979	41.0788	5.92122	3.85155	2.14568	6.21389	6.93638
TBC1D17	NM_024682	2095	3.58497	10.6542	0.853508	3.2107	6.97782	3.41555	2.97109	12.4682	2.17263	2.04236
TBC1D24	NM_001199107	6609	3.13133	7.51931	4.91165	4.25828	9.62049	6.1423	2.40055	1.5306	2.25871	1.56601
TBC1D25	NR_145499	4082	0.670061	2.30628	0.257622	0.605834	2.80912	1.03123	3.43677	8.9176	4.62915	2.72142
TBC1D9	NM_015130	5554	2.36196	4.25895	1.47616	2.34261	6.53692	1.47679	1.80238	2.8832	2.78926	4.42344
TBC1D9B	NM_198868	5206	8.23189	20.2178	10.5835	9.30794	43.2614	21.9601	2.45574	1.91014	4.64729	1.96991
TBCD	NM_005993	7159	10.7811	27.5424	10.2781	9.98815	26.7642	3.65595	2.55446	2.67946	2.67932	7.31872
TBKBP1	NM_014726	4134	2.25282	3.69094	1.22431	2.30283	6.67288	2.93967	1.63764	3.01226	2.89644	2.26917
TEAD2	NM_001256661	2212	10.9688	30.9992	17.8235	5.80221	19.9265	0	2.82587	1.73913	3.43371	19926.5
TEP1	NM_007110	10775	2.38546	8.73926	3.12376	2.22553	11.0921	1.13637	3.66203	2.79678	4.98179	9.75239
TESK1	NM_006285	2530	2.09219	6.82258	0.804591	3.21617	10.9641	6.44015	3.25942	8.46904	3.408	1.7022
TEX19	NM_207459	1935	0.627403	1.47766	0	4.91725	8.54929	0	2.35146	1477.66	1.73828	8549.29
TFE3	NM_006521	3291	2.22941	7.7375	4.98664	3.03435	7.99352	1.17382	3.46909	1.55133	2.63348	6.80405
TFEB	NM_001167827	2152	1.1103	2.61512	0.462634	0	2.52151	0	2.35322	5.64049	2521.51	2521.51
THADA	NM_022065	6114	2.84782	7.40899	2.15235	1.4013	4.96306	2.65019	2.60072	3.44069	3.53923	1.87201
THAP11	NM_020457	1876	4.29404	11.63	2.14692	3.02858	7.31326	2.1478	2.70776	5.41451	2.41395	3.40341
THAP8	NM_152658	1349	0.665566	1.30634	0	0.782401	27.2079	0	1.9598	1306.34	34.7305	27207.9
TIAM2	NM_012454	5916	0.752833	1.93435	0.85547	0.885028	2.79772	0.684716	2.56602	2.25852	3.1576	4.08
TIGD3	NM_145719	2026	0	0.970123	0	0.484156	1.40311	0	970.123	970.123	2.89209	1403.11
TIMM22	NM_013337	3182	1.25879	3.95283	1.04895	1.47977	2.85858	0	3.13768	3.76479	1.93047	2858.58
TIMM23B	NM_001290117	2515	0	0.758367	0	0.189195	1.09685	0	758.367	758.367	5.76695	1096.85
TINAGL1	NM_022164	2207	3.98229	6.18143	4.07268	11.0647	18.4974	5.43253	1.55184	1.51741	1.6716	3.40431
TJP3	NM_001267561	3072	4.42685	8.4326	4.23143	6.73432	22.175	0	1.90445	1.99238	3.29235	22175
TKFC	NM_001351977	2252	4.22899	8.71479	1.32145	6.21396	26.4094	0	2.06024	6.58988	4.24933	26409.4
TLK1	NM_012290	5723	2.04936	3.41184	1.05991	2.65822	12.9985	1.41387	1.66401	3.21597	4.8881	9.18709
TLN1	NM_006289	8623	6.91365	17.922	7.92154	4.68434	12.1019	2.40149	2.59189	2.26215	2.58292	5.03722
TLN2	NM_015059	11649	0.695164	2.00569	0.434484	0.653717	1.65765	1.04313	2.88106	4.60567	2.53186	1.58759
TLNRD1	NM_022566	4866	3.98153	17.7384	3.31781	6.78658	31.6455	7.9663	4.45406	5.3448	4.66226	3.97192
TMC6	NM_007267	2809	8.07271	23.4254	5.22534	17.4538	52.0487	14.421	2.90145	4.48218	2.98192	3.60898
TMCC2	NM_014858	3968	1.11242	2.02446	1.01122	2.02093	13.0902	7.08188	1.81824	2.00002	6.47409	1.84814
TMCO6	NM_001300980	1911	3.81412	6.48746	2.11877	4.23434	7.21762	2.1197	1.70046	3.06045	1.70414	3.40342
TMEM120B	NM_001080825	7510	5.5536	13.5239	6.06559	8.1762	12.8562	6.47276	2.43472	2.22924	1.5722	1.9859
TMEM127	NM_001193304	6248	3.89867	13.564	5.31614	5.72856	10.8653	5.31839	3.47825	2.551	1.89635	2.04258
TMEM129	NM_001127266	2803	3.42553	10.2526	1.78408	3.35559	25.2813	2.85571	2.99211	5.74346	7.53184	8.8498
TMEM132A	NM_017870	3501	11.2737	27.7698	15.5294	15.551	53.2908	27.6195	2.46302	1.78809	3.42661	1.92939
TMEM158	NM_015444	1822	5.0099	11.7988	0.544432	16.8993	65.2918	19.6115	2.35464	21.6321	3.86336	3.3291
TMEM187	NM_003492	1452	0.971635	1.71616	0	0	1.65482	0	1.76444	1716.16	1654.82	1654.82
TMEM203	NM_053045	1566	5.20478	13.1771	3.25286	4.58864	10.6372	2.60333	2.53123	4.04967	2.31765	4.08442
TMEM216	NM_001173991	1306	1.55027	6.57185	0	0.728898	2.11223	0	4.23642	6571.85	2.89387	2112.23
TMEM259	NM_001033026	2687	21.6821	47.8942	25.4194	34.6276	85.5689	43.3808	2.20882	1.88408	2.47105	1.97246
TMEM268	NM_001330760	4489	1.17865	2.02854	0.906579	1.27897	2.47073	0	1.71961	2.23511	1.93031	2470.73
TMEM8B	NM_001042590	14670	1.05695	4.56353	2.34859	1.1043	9.60058	4.69936	4.31355	1.94227	8.68598	2.04252
TMEM94	NM_001321148	5372	4.34043	14.7164	4.48986	6.15775	12.2354	0	3.38975	3.27696	1.98666	12235.4
TNFAIP2	NM_001371220	4226	5.62534	10.2789	5.81915	4.50339	7.92882	0.970245	1.82693	1.76609	1.76024	8.16356
TNFAIP3	NM_001270507	4641	0.172667	0.40665	0.215742	0.405909	2.35272	0	2.34155	1.87619	5.78193	2352.72
TNFRSF21	NM_014452	3595	9.00584	20.6861	10.562	11.3706	40.9015	10.0103	2.29671	1.95835	3.59683	4.08552
TNK2	NM_001010938	4010	4.31592	18.522	11.9882	10.2595	32.0157	10.5541	4.29055	1.54489	3.1203	3.03319
TNKS1BP1	NM_033396	5820	5.98348	17.2871	10.7838	8.75109	36.0227	12.5284	2.88865	1.60292	4.1159	2.87506
TNPO3	NM_012470	4412	6.79169	11.6181	4.35926	4.42324	9.37862	3.67256	1.71038	2.66454	2.11982	2.553
TNRC18	NM_001080495	10570	4.36723	30.6006	10.1995	9.25422	73.075	14.5632	7.00526	2.9999	7.89554	5.01745
TNRC6C	NM_001142640	9771	2.98377	6.34405	2.69343	1.94859	5.64641	2.90201	2.12547	2.3545	2.8962	1.94502
TOP3A	NM_004618	6595	2.90397	5.77061	1.51239	1.49349	7.83097	0	1.98646	3.81304	5.2399	7830.97
TOP3B	NM_001282113	2827	3.32139	7.4962	0.691875	3.57887	21.684	2.76884	2.25627	10.819	6.0572	7.82862
TOR4A	NM_017723	4171	3.58259	10.781	5.47316	7.72073	16.2708	3.98211	3.00844	1.96944	2.10714	4.08494
TP53I13	NM_138349	1473	2.38189	9.34951	4.6313	6.53322	21.6359	0	3.9236	2.01833	3.31117	21635.9
TPCN1	NM_001143819	5340	3.77307	7.90847	3.20694	7.00774	27.2464	1.50981	2.09547	2.46528	3.88749	18.0343
TPRA1	NM_001353002	3882	2.84689	5.2521	3.32128	2.00794	3.23239	0.949341	1.84421	1.58087	1.609	3.40129
TPST2	NM_001362923	5772	1.28271	4.02807	0.534394	3.26712	11.6518	4.27754	3.13784	7.52355	3.5653	2.72332
TRAF4	NM_004295	2894	5.72092	19.3886	6.27879	7.13497	13.3081	2.79175	3.38847	3.08746	1.86493	4.76523
TRAF7	NM_032271	3683	12.8094	32.7682	15.459	15.4469	27.8341	12.1514	2.55794	2.11954	1.80181	2.29041
TRAK1	NR_146089	5236	3.17374	7.29233	2.70924	3.36683	5.80084	1.54878	2.29699	2.69066	1.72243	3.74301
TRAPPC12	NM_016030	2499	2.93068	4.60142	1.6281	2.29669	4.43679	1.6288	1.56955	2.82451	1.93097	2.72229
TRAPPC9	NM_001374682	6919	4.05446	11.9022	4.5682	3.62478	28.0098	9.14025	2.93485	2.60487	7.72518	3.06411
TRIB1	NM_025195	3595	44.2808	111.238	40.6587	32.999	94.1029	40.1186	2.51205	2.73583	2.85161	2.34556
TRIB3	NM_001301201	2346	5.17815	16.4633	3.45187	16.2317	44.6829	10.3602	3.17877	4.76801	2.75264	4.3125
TRIM28	NM_005762	3364	35.3751	82.9897	51.6578	36.677	64.7926	35.594	2.34593	1.6065	1.76652	1.82028
TRIM7	NM_203293	2864	1.43587	3.38174	0	0.964517	12.1113	1.36805	2.35355	3381.74	12.5438	8.84648
TRIO	NM_007118	11460	4.85182	13.2309	3.83029	5.23163	19.8816	8.39366	2.72644	3.45338	3.79954	2.36837
TRMT1	NM_017722	2273	3.7411	10.8036	4.00819	2.09407	10.9227	1.78212	2.88705	2.69471	5.21352	6.1256
TRMT11	NR_146803	4729	2.0754	4.88796	2.07539	1.70779	7.06962	4.1526	2.35405	2.35406	4.1372	1.70205
TRNP1	NM_001013642	1961	12.8814	24.7099	11.9459	20.0265	53.7845	22.8628	1.91812	2.06832	2.68553	2.35239
TRPM4	NM_017636	4058	5.14067	13.9695	5.68417	4.99703	12.1227	5.93388	2.71692	2.45718	2.42549	2.04261
TRRAP	NM_001375524	12675	5.97314	18.8068	5.27022	4.69346	15.0148	1.91723	3.14804	3.56782	3.1984	7.82739
TSC2	NM_000548	6414	5.08453	11.7251	4.59	4.73171	10.584	2.8258	2.30559	2.55394	2.23636	3.74416
TSNARE1	NM_001363740	1908	1.33461	4.59417	1.53996	1.56889	2.79772	0	3.43975	2.98137	1.78211	2797.72
TTC3	NM_001320703	7906	3.70098	8.11922	3.67546	2.5626	8.63459	3.55018	2.19321	2.20843	3.36815	2.43147
TTC38	NM_017931	2566	3.56835	6.94233	3.8784	2.00611	15.8539	7.76023	1.94499	1.78954	7.89887	2.04271
TTC5	NM_138376	4737	1.51898	4.59952	1.62741	1.27539	2.95662	0	3.02604	2.82454	2.31639	2956.62
TTLL4	NM_014640	5006	3.40416	10.4986	2.43143	4.28733	9.93879	2.43243	3.08314	4.31609	2.31764	4.08427
TTYH3	NM_025250	4805	11.1688	32.0391	12.8057	11.7469	36.6132	22.6822	2.86837	2.50173	3.11658	1.61412
TUBG1	NM_001070	1608	1.86796	3.91031	2.07539	2.6837	15.5532	2.0763	2.09224	1.88322	5.79328	7.48722
TULP4	NM_020245	11314	5.20775	9.17719	4.7341	3.03946	6.45048	2.55017	1.76188	1.93812	2.12155	2.52844
TWNK	NM_021830	3616	5.7032	13.6951	5.31164	4.07507	9.90376	2.23737	2.40089	2.57784	2.42973	4.42454
TXNRD2	NM_006440	1941	1.33766	2.70024	1.43313	1.34772	7.81093	0	2.01712	1.88285	5.79135	7810.93
TXNRD3	NM_052883	2912	1.1097	1.79684	0.346687	1.46758	2.83508	0	1.61775	5.16797	1.9305	2835.08
TYK2	NM_003331	4243	5.05196	15.0412	5.71913	5.04229	15.5852	2.86076	2.9767	2.62951	3.09029	5.44602
UBE3B	NM_130466	5730	2.74936	7.13913	2.81965	1.40875	2.88152	0	2.59571	2.53103	2.044	2881.52
UBE3C	NM_014671	5214	10.8638	18.0386	6.05693	9.18736	16.5057	5.47302	1.66028	2.97769	1.79637	3.01528
UBE4B	NM_001105562	5904	5.92344	10.5439	4.30469	2.83377	5.16146	2.06709	1.77973	2.44883	1.82077	2.49576
UBL4A	NM_014235	2327	4.41989	9.20828	4.24966	1.79838	10.4228	1.70058	2.0829	2.16632	5.79244	6.12537
UBN1	NM_001079514	6443	4.69721	15.3058	6.75608	5.06776	14.4657	2.57482	3.25778	2.26515	2.8539	5.61598
UBR4	NM_020765	15891	8.77067	36.208	6.75619	9.59064	44.1178	9.18213	4.12783	5.35844	4.59961	4.80422
UCKL1	NM_001353475	1841	4.75878	9.16975	4.86677	6.35673	25.0512	4.32779	1.92651	1.88377	3.94028	5.78711
ULK1	NM_003565	5322	4.18735	16.4361	3.68308	6.10717	15.3196	3.87863	3.92423	4.46138	2.50805	3.94872
ULK2	NM_014683	9149	2.18149	3.42507	0	0.976852	4.24613	0	1.56934	3425.07	4.34231	4246.13
ULK4	NM_017886	4294	0.524617	4.42746	0.437137	0	0.595646	0	8.42337	10.1052	595.646	595.646
UNC119	NM_005148	1379	5.26644	8.61317	5.1199	5.5028	13.9523	2.92686	1.63517	1.68197	2.53503	4.76535
UNC13B	NM_001371189	14603	2.19625	4.8769	2.19619	1.91772	3.41989	0	2.21955	2.21961	1.78238	3419.89
UNKL	NM_001372107	5250	1.97872	6.52417	1.78062	2.79121	15.637	3.95899	3.2955	3.66193	5.60021	3.94874
URB1	NM_014825	10818	5.0579	16.0589	4.58931	4.36003	15.8245	2.99837	3.17438	3.49843	3.62861	5.27594
USP34	NM_014709	11675	8.4495	27.4461	8.50278	4.79784	9.87818	4.65617	3.24786	3.22751	2.05845	2.12107
USP40	NM_001365479	6129	2.66727	6.28187	2.52303	2.4575	6.87557	2.16351	2.35428	2.48882	2.79666	3.17649
USP7	NM_003470	5830	6.65906	11.3656	6.54656	4.13368	10.704	5.61368	1.70654	1.73586	2.58883	1.90643
UVRAG	NM_003369	5117	0.705426	1.38439	0.195898	1.47422	4.80587	2.35241	1.95971	7.03097	3.25773	2.04208
VAC14	NM_018052	3096	2.34059	7.8093	3.9009	2.29283	8.85864	1.30084	3.33504	2.00141	3.86195	6.80473
VAMP8	NM_003761	679	5.2181	8.60256	1.30449	4.29376	7.10969	0	1.64829	6.58953	1.65544	7109.69
VOPP1	NM_001321242	2848	0.284358	2.17638	0.35534	0	6.78018	1.42232	7.62685	6.10761	6780.18	4.76365
VPS39	NM_001301138	4855	3.72863	7.90321	3.31412	3.50639	10.1605	0.8289	2.11903	2.38399	2.89688	12.243
VWA5B2	NM_138345	4196	2.35883	7.40691	2.2113	4.04354	13.3911	8.84898	3.13875	3.34806	3.31092	1.51313
VWA8	NM_015058	7174	2.65803	4.19549	1.13097	1.52904	2.31164	0.565728	1.57783	3.70635	1.51084	4.07892
WASHC2A	NM_001005751	4642	0	0.202509	0	0	0.58588	0	202.509	202.509	585.88	585.88
WDFY3	NM_014991	14607	2.88488	8.72585	1.62614	1.69553	3.27548	1.98057	3.02363	5.36268	1.93069	1.65298
WDR24	NM_032259	3243	1.85804	5.98037	3.40619	1.31043	4.21929	0	3.21691	1.75522	3.21733	4219.29
WDR59	NM_030581	5878	4.75344	10.6092	3.3162	4.67806	9.03707	0	2.23142	3.19823	1.93139	9037.07
WDR70	NM_018034	2873	1.11852	2.19533	0.46598	0.657439	2.54009	0	1.96095	4.70112	3.85775	2540.09
WDR90	NM_145294	5540	2.99624	11.0149	2.92302	2.31939	4.97844	0	3.67502	3.76704	2.14551	4978.44
WIZ	NM_001371589	8987	3.46997	7.0939	3.61432	2.8326	11.8197	1.92852	2.04378	1.96218	4.17125	6.12572
WNK1	NM_001184985	11232	7.35447	14.5188	4.95688	6.1025	15.7184	5.04912	1.97387	2.92842	2.57531	3.11248
WNK2	NM_001282394	8240	2.16224	11.342	3.56263	4.15916	14.3955	3.93283	5.24304	3.1827	3.46032	3.65941
WNT7B	NM_058238	3948	1.24141	4.26375	2.06905	3.40515	9.86715	2.58741	3.43185	2.05974	2.89686	3.81205
WRAP53	NM_001143992	1749	2.80449	5.58877	1.61772	2.53589	11.7574	0	1.99208	3.45258	4.63456	11757.4
WWP1	NM_007013	4877	2.0715	3.71705	1.72617	2.43501	6.72001	3.94722	1.79351	2.15211	2.75861	1.70203
XPO6	NM_015171	4537	8.20687	28.0362	14.7673	8.48102	59.5952	20.7505	3.41577	1.89841	7.02606	2.87185
XXYLT1	NM_152531	2714	1.48811	4.20574	0.371953	2.09918	11.1519	0	2.82433	11.2768	5.30997	11151.9
ZBED3	NM_032367	6134	1.08706	5.76027	2.71754	1.59728	20.3654	0	5.29409	2.11888	12.742	20365.4
ZBED4	NM_014838	6893	5.99807	9.62517	5.14516	4.07836	6.40971	1.76481	1.60444	1.87036	1.57126	3.62989
ZBTB4	NM_020899	5930	4.22509	8.8271	5.45159	5.52739	17.6415	6.13559	2.08871	1.61888	3.19108	2.87481
ZBTB42	NM_001137601	3611	0.68804	3.64607	1.71994	1.88721	10.9374	3.44165	5.29152	2.11865	5.79248	3.17704
ZC3H11A	NM_001319239	5098	1.04058	4.82523	0.97557	0.917364	1.59515	0	4.63259	4.941	1.73695	1595.15
ZC3H7B	NM_017590	5906	5.46463	10.7785	4.95215	5.05864	13.9603	6.15006	1.97205	2.17609	2.75915	2.26958
ZCCHC14	NM_015144	8079	7.17757	23.2514	6.15188	5.8544	13.1722	1.75837	3.239	3.77894	2.24958	7.48686
ZDHHC5	NM_015457	4443	8.61369	14.5349	8.87969	6.05432	16.3337	7.10673	1.68722	1.63668	2.69741	2.29802
ZDHHC7	NM_001145548	3559	7.91802	13.6944	7.11349	6.25345	14.3281	0	1.7293	1.92486	2.29086	14328.1
ZDHHC8	NM_001185024	3257	6.91653	13.5496	6.91621	8.13036	21.4175	3.77404	1.95874	1.95883	2.63394	5.67346
ZER1	NM_006336	4291	2.54371	5.65802	2.82622	3.76537	7.70187	4.71244	2.22345	2.00126	2.04491	1.63402
ZFP36L2	NM_006887	3693	7.62051	12.266	7.12688	12.6313	20.1683	7.67828	1.6094	1.72086	1.59656	2.62633
ZFPM1	NM_153813	5432	3.37337	7.20902	1.87384	5.72776	20.4276	7.49928	2.1364	3.84514	3.5658	2.72358
ZFYVE26	NM_015346	9674	1.71599	4.53416	2.72031	0.787146	9.9793	2.09347	2.64076	1.66617	12.6617	4.76461
ZGPAT	NM_032527	2008	6.65473	10.6859	2.52061	5.92622	15.1117	4.03472	1.60551	4.23772	2.54955	3.74449
ZMIZ2	NM_031449	5227	11.3771	25.3109	14.9589	12.6797	38.0826	17.3282	2.22452	1.69192	3.00321	2.1976
ZNF236	NM_001306089	7932	1.07205	3.30623	0.765712	0.900138	1.39108	0	3.08116	4.31222	1.54369	1391.08
ZNF263	NM_005741	3281	1.97227	6.24153	2.15708	2.17348	6.71793	3.69942	3.16303	2.89217	3.08944	1.81545
ZNF276	NM_001113525	4627	7.36236	37.6714	10.0791	6.90293	23.2866	9.64486	5.11606	3.73721	3.37295	2.41416
ZNF296	NM_145288	1634	0.696521	1.91387	0.580427	1.91049	20.5628	2.32272	2.74381	3.29167	10.7575	8.8491
ZNF316	NM_001278559	7243	2.51708	8.82647	3.56586	5.58907	10.67	2.79784	3.50524	2.47458	1.90873	3.81228
ZNF324B	NM_207395	2978	0.27028	2.86559	0.675954	0.0794153	1.84207	0	10.5632	4.23306	22.9069	1842.07
ZNF335	NM_022095	4454	3.18341	7.06888	1.36425	3.42135	5.5766	0	2.21984	5.17771	1.62946	5576.6
ZNF341	NM_001282933	3343	0.565664	1.59868	0.282772	0.132991	1.54153	0	2.82122	5.63368	11.5047	1541.53
ZNF384	NM_001135734	3241	3.74814	7.0619	3.74803	4.40602	9.36261	0	1.88361	1.88366	2.12448	9362.61
ZNF395	NM_018660	4797	4.46925	10.2276	2.52961	4.16317	19.5318	1.68715	2.28793	4.04157	4.69044	11.57
ZNF398	NM_170686	5444	2.31218	4.08409	0.932191	2.80559	4.57306	2.23841	1.76557	4.37648	1.6294	2.04208
ZNF408	NM_024741	2229	0.648605	1.52761	0.405295	1.33437	2.20951	0	2.3516	3.75986	1.65461	2209.51
ZNF426	NM_024106	7104	0.399018	0.660013	0	0.268027	2.71852	0	1.64996	660.013	10.105	2718.52
ZNF48	NM_001214909	3032	1.69725	4.28288	2.42462	2.13764	4.9555	0	2.52194	1.76569	2.31712	4955.5
ZNF500	NM_021646	5824	1.20197	3.99634	2.47446	2.24399	4.3351	0	3.32206	1.61438	1.93101	4335.1
ZNF503	NM_032772	3205	5.09954	12.8679	5.16004	10.5618	19.8518	0	2.52284	2.49327	1.87941	19851.8
ZNF516	NM_014643	8678	6.00867	10.3369	4.69406	5.84922	13.7513	1.8784	1.72005	2.20166	2.35057	7.31687
ZNF579	NM_152600	2922	2.61486	7.03806	3.26844	5.70841	8.90684	5.60544	2.69053	2.15268	1.56003	1.58868
ZNF585A	NM_001288800	8571	0.180724	0.63853	0.301231	0.21248	0.410475	0	3.51373	2.11272	1.92278	410.475
ZNF592	NM_014630	8187	2.82196	5.97565	1.60895	1.86232	3.70996	0.495263	2.11681	3.7117	1.99105	7.4758
ZNF614	NM_025040	4628	0.173176	0.305849	0	0.305326	1.17989	0	1.75597	305.849	3.85174	1179.89
ZNF628	NM_033113	3562	0.947296	2.58213	0	2.10341	11.4731	0	2.72291	2582.13	5.45195	11473.1
ZNF687	NM_020832	4791	4.12917	13.8471	4.9368	4.11522	11.6189	7.18391	3.35268	2.80431	2.82272	1.61713
ZNF827	NM_001306215	7651	1.97575	4.34697	0.64988	1.10014	4.9589	1.56041	2.19905	6.6786	4.50345	3.17592
ZNF839	NM_018335	3799	1.70759	4.02172	1.06717	2.00728	8.72507	0	2.35382	3.76504	4.34455	8725.07
ZNF865	NM_001195605	4949	2.1273	10.1166	1.02264	3.84719	30.0996	2.45555	4.75336	9.88294	7.82176	12.2528
ZNRF1	NM_032268	4626	6.3803	16.2613	7.4288	8.52744	13.6946	8.74349	2.54827	2.18866	1.60576	1.56609
ZNRF3	NM_001206998	6872	3.15355	9.34325	3.18375	2.81589	11.9812	3.6401	2.96183	2.93374	4.25335	3.29055
ZXDC	NM_025112	3377	4.99472	11.7631	3.86478	3.63456	35.6468	5.94835	2.35464	3.04288	9.80503	5.99172
ZZEF1	NM_015113	11466	2.27427	8.82937	2.39855	2.04677	8.71511	3.19945	3.88057	3.6796	4.25591	2.72309

## Sheet: normalized.counts
Symbol	Gene_id	Length	WT_eCLIP-seq_Input.rep1	WT_eCLIP-seq_TOP3B-IP.rep1	KO_eCLIP-seq_TOP3B-IP.rep1	WT_eCLIP-seq_Input.rep2	WT_eCLIP-seq_TOP3B-IP.rep2	KO_eCLIP-seq_TOP3B-IP.rep2	WT-IP/WT-Input.rep1	WT-IP/KO-IP.rep1	WT-IP/WT-Input.rep2	WT-IP/KO-IP.rep2
A4GALT	NM_017436	2092	2.05827	8.37313	3.27444	4.39923	10.1981	0	4.06607	2.55634	2.31762	10198.1
AAAS	NM_015665	1815	5.51077	5.97003	0.551008	3.10939	12.0134	17.6412	1.08314	10.8151	3.86235	0.680947
AACS	NM_023928	3256	2.42396	4.13884	2.57541	1.70962	3.30264	2.42489	1.70677	1.60644	1.93067	1.36142
AADAT	NM_001286682	2120	1.91003	2.69897	3.34239	0.898094	7.80728	0	1.41232	0.807257	8.6835	7807.28
AAGAB	NM_024666	3132	6.32899	4.76975	6.01217	3.57106	3.44925	0	0.753517	0.793218	0.965619	3449.25
AAK1	NM_014911	21157	1.59946	1.61445	2.61809	1.61159	3.50249	1.14295	1.00874	0.616417	2.17196	3.06176
AAMDC	NM_001363564	511	0.515119	1.21324	2.57575	1.21116	0	0	2.3507	0.470841	0	0
AAMP	NM_001302545	1763	10.5922	12.4729	14.8946	7.52248	19.543	8.83022	1.17744	0.837353	2.5976	2.21295
AAR2	NM_001271874	2417	1.46589	5.5623	4.88616	1.53174	0	1.62942	3.79189	1.13815	0	0
AARS2	NM_020745	4798	2.03223	5.0853	2.54022	2.38888	2.30742	5.92973	2.50109	2.00113	0.965494	0.389061
AARSD1	NM_001261434	1320	2.67176	2.7966	8.90577	3.83865	0	2.96978	1.04633	0.313986	0	0
AASDH	NM_001323890	3697	2.177	1.92266	1.0884	0.76773	0	0	0.882764	1.76488	0	0
AASDHPPT	NM_015423	2767	7.35982	3.99987	2.47677	4.82485	0.96416	0	0.543401	1.61431	0.199791	964.16
AASS	NM_005763	5824	1.17246	0.974564	0.172363	0.243209	0	0	0.830506	5.62152	0	0
AATK	NM_001080395	5460	0.381208	1.25694	0.762366	1.8821	4.15522	1.52545	3.28861	1.64657	2.20658	2.72214
ABAT	NM_000663	5586	1.37727	1.28041	0.543624	0.511236	1.97532	0	0.929002	2.351	3.85627	1975.32
ABCA1	NM_005502	10408	0.385533	0.453969	0.192668	0.181239	0	0.385689	1.17446	2.34405	0	0
ABCA2	NM_212533	8146	6.7107	25.3457	14.2908	10.4595	54.1827	23.3723	3.77635	1.77345	5.17973	2.31815
ABCA3	NM_001089	6602	0.917104	1.94387	2.4455	1.72487	8.33028	1.22324	2.11727	0.794552	4.8267	6.80444
ABCA5	NM_018672	9249	1.68368	1.39943	0.866545	0.407441	0	0	0.830685	1.6131	0	0
ABCA7	NM_019112	6814	8.43356	31.4015	5.34498	14.5913	66.7594	17.2301	3.72296	5.87385	4.57499	3.87436
ABCB1	NM_001348945	4768	0.0848919	0.0999855	0	0.399266	0.578508	0	1.16409	99.9855	1.44531	578.508
ABCB10	NM_012089	3869	1.04983	1.97795	1.04975	1.23408	1.43033	0	1.88228	1.88242	1.15809	1430.33
ABCB6	NM_005689	2980	3.32452	4.54114	0.997259	2.50107	14.495	1.33032	1.36554	4.54906	5.79319	10.8876
ABCB7	NM_004299	4594	1.84057	2.95551	1.6731	0.786708	0	0	1.60489	1.76543	0	0
ABCB8	NM_001282291	4707	3.59175	6.0421	4.06195	4.42317	6.40851	1.71096	1.68175	1.48712	1.44852	3.74338
ABCB9	NM_019625	3484	0.68821	3.9172	3.44115	1.7529	1.56289	6.8853	5.68361	1.13801	0.891094	0.226957
ABCC10	NM_001198934	5043	4.18778	8.15576	3.82521	3.97609	10.9728	1.61128	1.94705	2.13155	2.759	6.80576
ABCC2	NM_000392	5806	18.2539	46.7547	18.4019	7.60402	8.61103	5.20674	2.56122	2.54062	1.13228	1.65351
ABCC3	NM_003786	5693	7.44649	11.2607	3.5271	10.504	17.0876	7.84136	1.51202	3.19173	1.62662	2.17889
ABCC4	NM_005845	5856	3.94141	4.64121	2.24718	3.08873	2.82639	0.691707	1.17725	2.06443	0.914768	4.0802
ABCC5	NM_005688	5788	2.20965	4.8788	2.58937	0.974005	0.470392	4.83558	2.20695	1.88344	0.482451	0.0972572
ABCD1	NM_000033	3669	0.331511	1.69178	0.552508	1.10422	3.7644	0	5.08788	3.05647	3.40601	3764.4
ABCD3	NM_002858	3604	5.03924	3.03292	1.67967	3.15924	1.52566	0	0.601742	1.80459	0.482766	1525.66
ABCD4	NM_005050	3035	3.4631	4.07801	3.20648	2.26158	1.74756	1.28312	1.17722	1.27141	0.772373	1.3609
ABCE1	NM_002940	3887	2.7034	1.02315	1.44801	2.26983	0	0	0.378329	0.706104	0	0
ABCF3	NM_018358	2572	4.88057	8.71343	2.3614	4.99681	4.29011	1.57494	1.78497	3.68839	0.858397	2.72225
ABCG1	NM_004915	2995	1.21681	1.27361	0.337919	0.635687	0.921002	1.35254	1.04582	3.75787	1.44655	0.680438
ABCG2	NM_001348989	4076	0	0.112404	0	0.224523	0	0	112.404	112.404	0	0
ABHD10	NM_018394	2604	23.5255	9.86893	11.3946	7.77766	0	0	0.419481	0.866026	0	0
ABHD11	NM_148912	1482	5.19138	4.18262	2.7322	6.74483	0	10.9334	0.80553	1.5303	0	0
ABHD12	NM_015600	1577	2.1139	4.97843	2.34859	4.69368	3.20019	9.39872	2.35397	2.11885	0.681664	0.340456
ABHD13	NM_032859	5313	1.83285	1.07917	0.190822	0.807949	0	0	0.588473	5.6259	0	0
ABHD14A	NM_015407	1066	0.365434	3.01244	0.913616	2.57757	0	0	8.22096	3.29366	0	0
ABHD14A-ACY1	NM_001316331	1836	2.58602	3.80634	2.15488	3.79982	4.40427	0	1.47132	1.76556	1.15877	4404.27
ABHD14B	NM_032750	2437	5.48329	8.60909	7.47691	4.49237	4.52783	16.6223	1.56977	1.15127	1.00767	0.272378
ABHD15	NM_198147	3492	1.6897	6.11135	2.11208	1.70239	1.64442	1.20739	3.61469	2.89215	0.96538	1.36084
ABHD17A	NM_031213	1859	0	0.555677	1.76966	0	1.60756	0	555.677	0.313824	1607.56	1607.56
ABHD17B	NM_016014	1626	3.7355	5.86497	1.24507	1.75641	0	2.49127	1.56964	4.70676	0	0
ABHD17C	NM_021214	2361	3.25999	4.44496	2.57356	3.22705	9.35108	8.58228	1.36307	1.72649	2.89682	1.08945
ABHD18	NM_001358454	5772	1.41925	1.00276	0.354763	1.08444	0	0	0.706043	2.81861	0	0
ABHD2	NM_007011	8822	4.21848	4.09406	5.73643	2.01619	3.00015	1.85494	0.970276	0.71357	1.4873	1.61652
ABHD3	NM_138340	2029	7.84746	3.92726	3.92351	5.99608	10.6921	11.7757	0.500387	1.0007	1.78289	0.907905
ABHD4	NM_022060	2509	1.12972	2.85063	1.6138	1.89714	1.09943	0	2.52108	1.76532	0.579216	1099.43
ABHD5	NM_016006	5298	0.797102	1.2515	1.32837	0.312333	0	2.65802	1.56809	0.941419	0	0
ABHD6	NM_020676	2425	0.834841	2.16288	1.66975	1.76655	3.41265	5.01133	2.58767	1.29455	1.93072	0.68085
ABHD8	NM_024527	2042	2.1312	6.15994	4.84347	3.41625	10.5591	19.3821	2.889	1.27154	3.08995	0.544759
ABI2	NM_001375670	6567	7.80709	5.53021	5.6416	4.87536	3.46242	3.66093	0.708266	0.980081	0.710042	0.945517
ABL1	NM_007313	5881	5.30172	19.2158	6.71293	5.26097	20.1699	9.64327	3.62377	2.86208	3.83314	2.09138
ABL2	NM_005158	11923	3.43147	4.24091	3.73718	2.39633	3.93483	1.69947	1.23553	1.13448	1.64134	2.31397
ABLIM1	NM_001322882	8047	12.1273	11.614	16.8568	5.73768	8.5702	8.05441	0.957593	0.688938	1.49341	1.06391
ABLIM3	NM_001301015	4451	1.01667	1.63258	1.38629	1.84699	0	1.84919	1.60424	1.17682	0	0
ABR	NM_001322841	6010	3.93463	9.98541	2.71339	4.50558	11.0915	4.07189	2.53718	3.67869	2.46118	2.72326
ABRACL	NM_021243	782	6.22968	7.33575	8.38579	3.37982	0	0	1.17736	0.874678	0	0
ABRAXAS1	NM_139076	4210	1.57784	1.18233	0	0.505762	9.77176	2.8699	0.748862	1182.33	19.2828	3.40373
ABRAXAS2	NM_032182	2955	2.84206	2.54986	1.01491	2.54538	1.84396	2.70779	0.896872	2.50992	0.724149	0.680732
ABT1	NM_013375	2943	2.86292	3.37123	1.78928	1.05167	4.87593	0	1.17714	1.88308	4.63197	4875.93
ABTB1	NM_172027	1962	3.48371	3.3783	1.02449	1.92706	1.39599	2.04993	0.969463	3.29433	0.72404	0.680665
ABTB2	NM_145804	4905	1.40398	4.4736	2.06455	4.56288	12.3779	4.131	3.1841	2.16582	2.71214	2.99562
ACAA1	NM_001607	1699	1.78087	6.29129	5.00856	2.09341	0	4.45391	3.53073	1.25586	0	0
ACAA2	NM_006111	2926	0.209304	1.97233	0	0	0	0	9.37849	1972.33	0	0
ACACA	NM_198834	10013	10.2571	31.222	10.0336	4.47974	11.8761	4.46125	3.04365	3.11143	2.65048	2.66147
ACACB	NM_001093	9367	1.00692	2.06217	0.98503	1.08072	0.894729	0.43795	2.04597	2.09138	0.827135	2.03834
ACAD10	NM_001136538	4099	2.46483	5.80505	1.47881	3.01333	2.01501	4.93166	2.35419	3.92282	0.668478	0.408505
ACAD11	NM_032169	3231	1.5942	2.41361	1.42332	1.874	0.775713	2.27828	1.51304	1.69457	0.413714	0.340332
ACAD8	NM_014384	2173	1.83964	2.59962	1.37971	1.0813	5.01328	0	1.41235	1.88281	4.63204	5013.28
ACAD9	NM_014049	2445	4.4031	4.99973	7.86236	3.32734	7.499	0	1.13524	0.635826	2.25307	7499
ACADM	NM_001286043	2721	3.86924	1.40188	1.86	0.874663	1.01381	0	0.362221	0.753296	1.15776	1013.81
ACADS	NM_000017	1859	1.87178	2.44897	4.6793	1.7113	1.41678	12.4834	1.30766	0.52325	0.827417	0.113484
ACADSB	NM_001609	5848	1.09053	1.12359	0.51109	0.80116	0	0	1.02937	2.19413	0	0
ACADVL	NM_001270447	2228	37.9851	52.648	14.5392	56.829	61.9071	10.9089	1.38598	3.62087	1.08934	5.67437
ACAP2	NM_012287	7093	4.5745	2.79307	1.69421	2.45633	1.15418	0	0.61044	1.64762	0.46969	1154.18
ACAP3	NM_030649	3793	5.06299	15.6025	10.5026	7.59759	14.6772	2.15528	3.08106	1.48544	1.93157	6.80672
ACAT1	NM_000019	1535	8.53881	3.35165	2.84607	3.12274	1.29267	0	0.392473	1.17723	0.413819	1292.67
ACAT2	NM_001303253	1723	3.76018	1.38366	4.70006	1.6575	0	2.35103	0.36788	0.29433	0	0
ACBD3	NM_022735	3584	5.67928	3.21005	3.40734	3.87201	0.77376	1.13623	0.565122	0.941822	0.199783	0.680388
ACBD5	NM_001352568	4008	2.32372	0.951721	0.50509	0.475032	0.688262	1.01067	0.409392	1.88053	1.44583	0.680324
ACBD6	NM_032360	1293	3.75865	5.60626	3.75841	5.00733	3.41403	5.01341	1.49116	1.49126	0.681671	0.680844
ACBD7	NM_001039844	3370	0.120087	0.424417	0.300193	0.14124	0	0	3.50506	1.40912	0	0
ACD	NM_001082486	1511	3.72397	3.00029	6.36959	2.99508	6.6761	0	0.805455	0.47096	2.22828	6676.1
ACE	NM_000789	4962	0.488913	0.0959063	0.407372	0.862109	0.555134	0	0.195762	0.23485	0.643179	555.134
ACER2	NM_001010887	2772	0.709836	0.501559	0.709872	0.16686	0	0	0.705591	0.705555	0	0
ACER3	NM_018367	7333	2.30506	1.42183	1.50916	1.22575	1.86941	1.64714	0.616561	0.941508	1.52387	1.13425
ACIN1	NM_014977	4937	8.7761	12.8455	12.9175	6.55614	5.02878	3.28203	1.46352	0.994344	0.766916	1.53175
ACLY	NM_001303274	4369	15.2	14.5154	11.1213	7.29957	6.94538	1.85431	0.954899	1.30507	0.951348	3.74351
ACO1	NM_001362840	7510	5.36922	3.95156	3.076	2.89275	3.0481	1.119	0.735827	1.28423	1.05334	2.72152
ACO2	NM_001098	2734	3.69327	6.0886	2.5851	3.29946	4.36074	5.91146	1.64812	2.35436	1.32125	0.737551
ACOT11	NM_015547	6369	5.42588	10.6487	10.5498	6.14184	15.0592	4.02067	1.96221	1.00928	2.45151	3.74453
ACOT13	NM_018473	4041	3.15737	1.6266	0.493207	0.927802	0	1.97406	0.515013	3.29133	0	0
ACOT7	NM_181864	1570	4.73453	4.98831	6.85241	4.39375	3.39513	22.4355	1.05338	0.727858	0.772541	0.151322
ACOT8	NM_005469	1154	0.691517	6.10791	2.59317	4.06485	0	0	8.81987	2.35447	0	0
ACOT9	NM_001037171	4317	4.22043	2.76098	1.75836	3.0318	0	0	0.654039	1.56931	0	0
ACOX1	NM_007292	7313	5.60847	4.08826	3.60509	2.60567	0.363852	3.7404	0.728814	1.13371	0.139585	0.0972502
ACOX2	NM_003500	2297	0.526059	0	0.438407	0	0	0	0	0	0	0
ACOX3	NM_003501	2872	2.11339	4.97725	1.40878	2.15305	4.79919	1.40944	2.35398	3.5305	2.22799	3.40262
ACOXL	NM_001371254	2714	0.85316	2.41126	0	1.20349	0	0	2.82296	2411.26	0	0
ACP1	NR_024080	1580	5.22149	3.07426	0.652649	5.06375	0	2.61171	0.588658	4.70323	0	0
ACP2	NM_001357016	2144	2.26639	3.55842	4.24931	1.99808	14.1532	5.66815	1.56939	0.837213	7.07983	2.49652
ACP7	NM_001004318	2902	0.547006	0.966134	2.05117	0.642987	1.86324	0	1.763	0.470788	2.89328	1863.24
ACSF2	NM_001288968	2320	3.66528	4.31606	2.61798	3.07756	8.32329	1.74605	1.17723	1.64799	2.70363	4.76419
ACSF3	NM_174917	3695	3.77824	7.50009	4.04799	5.45659	3.67708	3.2398	1.98455	1.85234	0.673754	1.13462
ACSL1	NM_001286710	3921	2.20414	2.47181	2.3614	0.986998	2.14506	0	1.12093	1.04631	2.17111	2145.06
ACSL3	NM_001354159	5410	9.03637	4.94326	4.62473	4.85112	2.4236	4.9826	0.546979	1.06864	0.499492	0.486314
ACSL4	NM_001318509	5182	4.93535	2.77168	2.27775	1.96356	0	0.759542	0.561483	1.21631	0	0
ACSL5	NM_016234	3354	32.7182	31.1346	6.6399	9.65049	8.22475	2.41554	0.95157	4.68831	0.852174	3.40352
ACSM3	NM_005622	2533	1.51873	2.2354	0.474517	1.11576	0	0	1.47092	4.70098	0	0
ACSS2	NM_001076552	3018	5.23269	6.16176	0.670762	3.46982	6.39825	2.68446	1.17733	9.17253	1.84344	2.38255
ACTA1	NM_001100	1490	0	0	0	0	0	0	0	0	0	0
ACTA2	NM_001613	1349	0	0.328148	0.696605	0.655176	1.89852	5.57581	328.148	0.470393	2.8933	0.340431
ACTB	NM_001101	1812	34.3413	36.2211	52.4053	23.2797	20.5716	10.5381	1.05471	0.691159	0.883635	1.95193
ACTG1	NM_001199954	2038	128.752	163.705	140.933	92.107	109.251	45.3849	1.27146	1.16158	1.18611	2.40715
ACTG2	NM_001615	1500	0	0	0	0	0	3.04343	0	0	0	0
ACTL6A	NM_004301	1854	6.18702	2.26096	4.26673	2.25706	1.45339	0	0.365377	0.52978	0.643646	1453.39
ACTL8	NM_030812	1841	0	0	0	0	0	0	0	0	0	0
ACTN1	NM_001130004	3791	10.2541	10.3138	11.6156	9.54254	8.73194	9.6169	1.00573	0.887854	0.914958	0.907884
ACTN2	NM_001278343	4868	0	0.0969941	0	0.193721	0	0	96.9941	96.9941	0	0
ACTN4	NM_004924	4990	21.9006	28.7948	16.7183	16.9227	18.0845	14.2996	1.31474	1.72225	1.06859	1.2646
ACTR10	NM_018477	2407	2.82009	2.14874	1.24404	1.75495	0	1.65946	0.761669	1.72584	0	0
ACTR1A	NM_005736	2830	10.5707	20.4141	10.5703	4.8047	8.64152	2.81992	1.93101	1.93108	1.79818	3.06337
ACTR1B	NM_005735	2204	5.37991	10.9809	8.51789	6.1133	8.55181	0	2.04072	1.28901	1.39866	8551.81
ACTR2	NM_001005386	3937	6.17116	3.8756	4.37103	5.23908	0.700674	2.05782	0.627915	0.886452	0.133715	0.340329
ACTR3	NM_005721	6589	6.03844	4.54513	1.95345	3.92485	3.87157	5.33008	0.752574	2.32553	0.986173	0.726226
ACTR3B	NM_020445	2213	2.37443	1.07537	0.913155	2.79114	3.73277	0	0.452704	1.17635	1.33688	3732.77
ACTR3C	NM_001164459	1219	0	1.11661	0	0	0	0	1116.61	1116.61	0	0
ACTR5	NM_024855	2546	3.26686	5.19336	2.04171	3.26413	2.22551	0	1.58922	2.54239	0.6816	2225.51
ACTR6	NM_022496	2465	1.80699	1.35402	2.05324	0.193064	0	0	0.748911	0.659133	0	0
ACTR8	NM_022899	3579	2.34322	2.36502	4.46309	1.44276	0.760088	1.11623	1.00887	0.529788	0.526464	0.680333
ACTRT3	NM_032487	1669	0	0	0	0.237589	0	0	0	0	0	0
ACVR1	NM_001347666	3011	2.44338	3.99616	1.35721	1.43612	3.69906	2.71595	1.63484	2.94221	2.57395	1.36148
ACVR1B	NM_020328	4654	4.66524	5.08666	3.67154	2.74202	1.76564	4.32135	1.0901	1.38505	0.643686	0.408491
ACVR1C	NM_145259	8853	0.593056	0.322256	0.456058	0.482623	0	0	0.542467	0.705066	0	0
ACVR2A	NM_001616	5214	1.88721	2.04449	0.943497	1.50853	2.0571	0.755181	1.08276	2.16463	1.36275	2.72038
ACVR2B	NM_001106	11782	3.73847	4.44405	3.47126	1.96706	1.94042	2.84941	1.18842	1.27987	0.985953	0.68075
ACY1	NM_001198895	1417	3.38855	4.56017	3.02535	4.2677	4.94662	0	1.34536	1.50682	1.15881	4946.62
ACYP1	NM_001302617	790	3.03313	1.19058	3.79129	1.18846	0	0	0.392396	0.313947	0	0
ACYP2	NM_001320586	1260	0.956455	0.375376	1.59407	2.24874	2.17208	0	0.392056	0.235335	0.965483	2172.08
ADA	NM_000022	1496	3.11878	1.83627	1.29941	2.74961	3.54117	0	0.588589	1.41207	1.28741	3541.17
ADAL	NM_001324366	4268	0.531571	0.31301	1.10744	0.312406	0	0	0.587734	0.282388	0	0
ADAM10	NM_001110	11158	9.08963	8.90379	10.8589	6.14607	0.547951	10.4611	0.979447	0.81988	0.0891402	0.0523749
ADAM11	NM_002390	4614	0.915408	3.01851	3.20417	2.25998	2.49473	10.0744	3.29385	0.941762	1.10339	0.247605
ADAM17	NM_003183	4391	3.9744	3.9182	6.7007	3.91135	3.77795	0	0.985611	0.584658	0.965646	3777.95
ADAM19	NM_033274	6481	10.4815	19.1345	16.8999	9.13736	24.9282	0.620412	1.82538	1.13216	2.72786	40.1154
ADAM21	NM_003813	2647	0	0.357881	0	0.178611	0	0	357.881	357.881	0	0
ADAM22	NM_001324418	9508	2.02129	2.28099	1.78951	1.08897	0	2.10627	1.12792	1.27394	0	0
ADAM9	NM_003816	4111	11.7586	12.6828	11.3629	7.89839	10.7704	10.8734	1.07851	1.11606	1.36344	0.990432
ADAMTS14	NM_139155	5564	2.25604	4.71337	5.09417	4.10631	4.9579	0.728047	2.0883	0.925067	1.20709	6.80051
ADAMTS16	NM_139056	4979	0.08133	0.478988	0	0.382551	0	0.813879	5.8179	478.988	0	0
ADAMTS17	NM_139057	6329	0.382056	1.72486	1.75132	1.34758	6.07421	0	4.5029	0.984332	4.50416	6074.21
ADAMTS7	NM_014272	5520	2.27326	5.18103	2.01644	2.41355	10.4908	5.13509	2.27812	2.56812	4.34481	2.04256
ADAMTSL5	NM_001367197	2543	2.97639	8.92899	5.13755	7.99715	13.5177	1.41775	2.99893	1.73765	1.6901	9.52792
ADAP1	NM_001284308	2179	2.78744	5.68948	6.50376	3.93201	20.2557	26.0266	2.04038	0.874663	5.15019	0.77824
ADAP2	NM_001346712	2767	1.60972	2.58485	0	1.20415	0	0	1.60477	2584.85	0	0
ADAR	NM_001365045	6458	17.6638	28.877	19.575	11.2738	13.2325	8.50129	1.63472	1.47512	1.17364	1.55635
ADARB1	NM_015833	7022	3.05407	5.0892	3.60139	2.43852	3.92563	3.45881	1.66582	1.41273	1.60918	1.13464
ADAT1	NM_012091	4984	1.77629	3.04253	1.41282	0.949115	8.25096	0.807719	1.7119	2.15199	8.68417	10.2025
ADAT2	NM_182503	6244	2.29887	1.3726	1.45689	1.25597	0.882254	0.647822	0.596818	0.941497	0.701887	1.35978
ADAT3	NM_138422	1599	4.08558	10.6912	5.10674	6.13666	4.63884	2.2706	2.61617	2.09314	0.7558	2.04211
ADCK1	NM_001366487	3439	1.2688	1.92094	1.35929	1.70451	0	0	1.51279	1.41215	0	0
ADCK2	NM_052853	2574	2.22678	5.2443	2.56918	2.41618	2.33382	5.14063	2.35405	2.04044	0.965512	0.453906
ADCK5	NM_174922	1956	4.27742	6.47603	2.03674	4.54923	2.77523	8.15063	1.51365	3.17804	0.60991	0.340451
ADCY3	NM_001377128	5015	5.47668	12.2935	10.0544	4.32536	21.5696	6.84841	2.24429	1.22258	4.98563	3.14912
ADCY6	NM_015270	6090	5.83973	11.6433	10.2855	4.83638	13.5623	15.2687	1.99346	1.1319	2.80365	0.888184
ADCY7	NM_001114	6270	1.78061	3.26163	2.14323	1.70546	4.94208	0	1.83072	1.52112	2.8961	4942.08
ADCY9	NM_001116	7979	1.88653	4.93673	2.62006	3.14165	11.0671	1.04846	2.61544	1.88349	3.5216	10.5455
ADD1	NM_014189	4047	8.50488	12.0178	9.00475	6.93935	7.49799	19.0181	1.41289	1.33446	1.08035	0.394235
ADD3	NM_001320593	4298	6.08169	3.74107	1.36148	3.41435	1.23672	2.72412	0.615036	2.74578	0.362106	0.453821
ADGRA2	NM_032777	6944	1.74474	5.61061	3.0197	3.39209	5.48606	3.35665	3.21389	1.85739	1.61684	1.6339
ADGRA3	NM_145290	4577	3.36922	6.26437	4.65461	2.6056	7.8522	0.886975	1.85874	1.34555	3.01244	8.84282
ADGRB1	NM_001702	6020	1.09868	2.32886	1.64806	1.54991	5.48921	12.4574	2.11776	1.41223	3.53935	0.440604
ADGRB2	NM_001364857	5708	2.90295	17.0045	6.14058	6.38746	37.5248	16.3822	5.85566	2.76876	5.87384	2.29045
ADGRE2	NM_013447	6791	1.06441	1.91695	0.312999	0.772839	0	0.626364	1.79925	6.10495	0	0
ADGRE5	NM_078481	3190	6.02987	11.0604	7.53702	5.04346	18.1693	2.32002	1.83397	1.46728	3.60184	7.82817
ADGRF1	NM_153840	5432	0.962646	0.43593	2.22145	0.348172	0.504478	5.92662	0.452375	0.196148	1.44478	0.0851064
ADGRF3	NM_001321971	4481	0.628336	1.16266	2.01955	1.37174	4.28066	0	1.84744	0.575417	3.11833	4280.66
ADGRG1	NM_005682	4311	3.9108	5.22753	3.96354	5.71542	5.76051	5.28689	1.33635	1.31857	1.00771	1.08938
ADGRG5	NM_153837	3806	1.45478	2.56971	0.606155	0.997582	0.825865	1.21279	1.76518	4.23238	0.827037	0.680402
ADGRG6	NM_198569	6822	6.09009	5.44744	6.00202	3.99237	4.38815	2.92894	0.894331	0.907451	1.09886	1.49769
ADGRL1	NM_001008701	7835	8.91594	38.7799	19.0038	9.75378	50.5582	11.8581	4.34901	2.04053	5.18292	4.26322
ADGRV1	NM_032119	19557	0.48162	1.43035	0.575928	0.246202	0.142642	0	2.96371	2.47925	0.577028	142.642
ADH5	NM_000671	2651	2.13841	0.719388	1.52739	0.359048	0	0	0.336255	0.470685	0	0
ADI1	NM_018269	2181	2.17446	0.569002	6.03986	1.13597	0	2.41693	0.261555	0.0941923	0	0
ADIPOR1	NM_001290553	2046	8.72453	12.0603	3.79302	5.12784	3.87617	9.48677	1.38218	3.17875	0.75576	0.408544
ADIPOR2	NM_001375363	4069	9.80413	13.5892	6.89325	8.76357	4.17437	3.06496	1.38593	1.9711	0.476278	1.36152
ADIRF	NM_006829	627	28.9237	47.5409	7.53171	19.8332	41.0503	6.02802	1.64361	6.31126	2.06967	6.80878
ADK	NM_006721	1992	3.96796	4.4388	0.991952	3.49822	0	1.98472	1.11838	4.4703	0	0
ADM	NM_001124	1492	7.13084	4.79822	0	4.78988	5.20475	0	0.672788	4798.22	1.08639	5204.75
ADM2	NM_001253845	4213	0.836877	3.19301	1.00418	4.01383	2.73667	6.02802	3.81083	3.17655	0.68164	0.453916
ADNP	NM_015339	6588	10.07	11.8579	7.74584	6.44979	3.95776	10.978	1.17743	1.53068	0.613531	0.360486
ADNP2	NM_014913	5156	6.31415	13.5427	3.85221	4.5947	6.14497	0.751928	2.14449	3.51466	1.33711	8.16143
ADO	NM_032804	3760	5.76298	4.4814	4.34922	3.70668	2.96298	0	0.777483	1.03015	0.799147	2962.98
ADORA1	NM_001048230	2746	0.277404	1.47005	0.69349	1.30451	1.89008	0	5.28027	2.11673	1.44776	1890.08
ADORA2A	NM_000675	2529	0.670061	1.38094	0.418794	1.96932	0	1.67587	2.05785	3.28957	0	0
ADORA2B	NM_000676	1885	4.94078	11.1302	5.37013	3.28267	1.46341	2.14898	2.25227	2.07223	0.445662	0.680662
ADPRH	NM_001291949	3537	0.21982	0	0	0.129269	0	1.10017	0	0	0	0
ADPRHL1	NM_138430	1993	0.995381	0.93767	0.497591	1.40407	0	0	0.941076	1.88064	0	0
ADPRM	NM_020233	1534	1.86711	0.628105	0	0.313501	0	0	0.336224	628.105	0	0
ADRA2C	NM_000683	2142	3.10208	8.27994	5.68682	6.07753	9.86211	2.06882	2.6683	1.45573	1.62245	4.76471
ADRM1	NM_175573	1476	13.1685	18.7371	15.7741	14.1896	22.4274	24.7004	1.42276	1.18776	1.58045	0.907943
ADSL	NM_001363840	1761	6.51616	6.02886	3.49064	2.18837	6.34154	2.32805	0.925076	1.72666	2.89651	2.7228
AEBP2	NM_001114176	5269	3.49414	3.27296	4.96311	2.9872	4.32798	3.17771	0.936433	0.659325	1.44836	1.36155
AEN	NM_022767	3072	4.93815	6.88613	4.54812	3.36063	0	2.60001	1.39419	1.51373	0	0
AFAP1	NM_001134647	7770	3.85643	4.47977	2.86614	3.06304	5.3254	0.52129	1.16133	1.56245	1.73803	10.1963
AFAP1L1	NM_152406	6022	0.401986	0.631187	0.33492	0.47255	0	0	1.56628	1.87898	0	0
AFDN	NM_001366320	8131	6.9491	6.89093	3.13484	4.72923	2.49158	5.74955	0.991487	2.19748	0.526736	0.433277
AFF1	NM_001166693	9285	4.36112	5.03273	1.96233	3.63982	1.48546	1.3088	1.15373	2.56336	0.408001	1.13412
AFF4	NM_014423	9535	7.52375	6.71934	2.85299	4.22325	2.59157	4.22839	0.892965	2.35437	0.613499	0.612752
AFG1L	NM_145315	5048	0.3232	0.0950905	0	0.379923	0	0	0.293308	95.0905	0	0
AFG3L2	NM_006796	3160	2.90227	4.45765	4.41625	2.96661	5.15781	0	1.53539	1.00915	1.73803	5157.81
AFMID	NM_001145526	1745	5.5692	3.00573	1.74024	2.72771	3.1617	0	0.539609	1.7262	1.15868	3161.7
AFTPH	NM_001375969	4190	3.73474	2.89333	2.2113	2.48392	0.66955	1.96631	0.774499	1.30784	0.269446	0.340338
AGA	NM_000027	2036	1.73363	1.13411	0	1.35867	0	1.92713	0.653804	1134.11	0	0
AGAP1	NM_001037131	10889	3.26558	6.614	4.29165	5.04506	4.83069	1.8667	2.02475	1.54077	0.957319	2.58643
AGAP2	NM_001122772	5838	2.1502	6.45238	3.12111	3.83208	8.50537	18.0408	2.99943	2.06667	2.21894	0.471426
AGAP3	NM_031946	3494	5.13439	20.5564	6.84549	4.02354	18.6548	10.2727	4.00289	3.00248	4.63526	1.81578
AGFG1	NM_001135187	8732	5.47201	3.98628	2.78227	4.41543	1.57953	1.39172	0.728352	1.43223	0.357647	1.13413
AGFG2	NM_006076	4819	1.43078	2.47779	1.05194	2.67136	2.8669	3.368	1.73057	2.3532	1.0728	0.850965
AGGF1	NM_018046	4489	2.15571	1.69232	0.673646	2.3229	1.2238	0	0.784676	2.50846	0.526616	1223.8
AGK	NM_018238	3627	2.3534	2.11919	2.07643	1.46458	0	4.15467	0.900097	1.0201	0	0
AGL	NM_000642	7091	3.47896	2.94454	1.08713	1.40575	0.740619	1.08757	0.846143	2.70605	0.526474	0.680359
AGO1	NM_001317122	7492	9.08013	11.647	9.52565	5.33681	5.89125	1.62201	1.28255	1.22257	1.10368	3.62982
AGO2	NM_012154	14595	15.6805	25.9228	29.5742	11.4792	16.5366	15.9098	1.65308	0.876505	1.44044	1.03933
AGO3	NM_024852	19659	3.77714	5.49431	2.49938	3.3953	3.78406	0	1.45424	2.19739	1.11417	3784.06
AGO4	NM_017629	7271	2.00738	2.22878	1.0036	1.55064	0	0.573758	1.10974	2.21856	0	0
AGPAT2	NM_006412	1546	7.58591	20.3299	8.50105	10.7622	21.3843	5.23366	2.6796	2.39117	1.98681	4.08514
AGPAT3	NM_020132	6563	3.70641	6.91051	6.79484	4.79258	6.73337	3.70786	1.86397	1.01687	1.40466	1.81548
AGPAT4	NM_020133	7920	3.70031	3.87315	1.67021	3.44354	9.45315	4.11307	1.04643	2.31757	2.74438	2.29776
AGPAT5	NM_018361	5234	7.7406	5.18384	5.04398	5.86476	2.99896	2.20186	0.669608	1.02752	0.511265	1.36139
AGPS	NM_003659	7633	4.46399	2.55049	4.35811	1.8629	0.719765	0.528488	0.57122	0.585095	0.38616	1.35936
AGRN	NM_001305275	7392	12.8697	71.8402	15.0597	30.128	91.592	21.3664	5.58167	4.77004	3.04	4.28652
AGTPBP1	NM_001286715	4474	3.43927	3.94331	2.03628	2.65976	14.1813	0.905387	1.14622	1.93557	5.32981	15.646
AGTRAP	NM_001040196	1259	6.11095	11.362	1.60803	5.29302	17.5287	0	1.85898	7.0614	3.31104	17528.7
AHCTF1	NM_015446	8567	0.750458	0.773234	0	0.220509	0.319496	0	1.02898	773.234	1.44236	319.496
AHCY	NM_001322086	3281	7.60779	10.6202	11.9634	5.19265	4.17966	1.22753	1.39578	0.88765	0.804764	3.40216
AHCYL1	NM_006621	3943	13.9667	9.55347	7.18837	10.744	6.9961	12.3282	0.683968	1.32883	0.651103	0.567441
AHCYL2	NM_015328	5049	2.8781	2.44761	2.19838	2.44341	0.544612	0.799758	0.850129	1.11286	0.222799	0.68012
AHDC1	NM_001371928	6428	2.96147	17.5491	6.05013	4.41704	20.8259	13.3797	5.92383	2.90014	4.71384	1.55642
AHI1	NM_017651	5563	1.79231	2.87039	3.40527	1.68553	2.44206	2.15161	1.60061	0.84268	1.44798	1.13446
AHNAK	NM_024060	1036	10.2443	16.8733	5.83508	7.06271	13.3983	4.10788	1.64693	2.8912	1.89678	3.26082
AHNAK2	NM_138420	18335	1.37031	2.3944	1.04975	2.96194	11.1427	0.884414	1.74606	2.27874	3.76068	12.5847
AHR	NM_001621	6243	4.53735	2.13713	1.45839	2.20961	0.883136	0	0.470905	1.4644	0.399498	883.136
AHSA1	NM_012111	1337	14.1726	10.5583	7.23059	7.81993	5.91116	11.5739	0.744926	1.46003	0.755813	0.510689
AIDA	NM_022831	2975	0.134674	0.158545	0	0	0	0	1.16857	158.545	0	0
AIF1L	NM_001185095	3515	6.10561	10.7168	8.06368	3.92712	2.35436	0	1.75495	1.32885	0.59936	2354.36
AIFM1	NM_004208	2221	3.92962	3.15494	0.446482	1.25977	0	1.78682	0.802656	7.05042	0	0
AIFM2	NM_032797	3134	2.24476	3.52442	2.8058	2.34553	0.849554	1.24754	1.56937	1.25567	0.362048	0.68044
AIG1	NM_001366344	2277	3.5859	3.24812	0.689567	2.26969	0	0	0.905552	4.70356	0	0
AIMP1	NM_004757	3145	2.03715	1.29165	1.17516	0.921013	2.1351	0	0.633737	1.0982	2.31569	2135.1
AIMP2	NM_006303	1198	4.98276	3.52043	4.15206	4.68572	0	0	0.706381	0.847673	0	0
AIP	NM_003977	1236	5.23328	1.54057	0.817628	4.22938	8.91301	39.2652	0.294324	1.8819	2.10691	0.226989
AJUBA	NM_032876	4168	3.42036	5.25826	5.22523	2.68041	3.23623	4.75224	1.53689	1.00613	1.20691	0.680847
AK1	NM_001318122	2185	3.76094	4.21779	5.37256	2.94727	13.4207	3.5832	1.12117	0.784917	4.55207	3.74442
AK2	NM_013411	3643	7.07537	4.61438	8.43575	4.86229	0	2.17784	0.652083	0.546938	0	0
AK3	NM_016282	4219	2.62079	1.81869	1.872	1.43035	1.27534	0	0.693679	0.971003	0.891004	1275.34
AK4	NM_013410	6845	1.29458	0.623572	1.02979	0.345836	0.400835	0.58864	0.481307	0.604944	1.15569	0.679797
AK6	NM_016283	1626	1.71217	0	0	0	0	4.28204	0	0	0	0
AK7	NM_152327	3283	0.487387	0.143406	0	0.716198	0	0	0.293633	143.406	0	0
AK8	NM_152572	1579	0.192258	0.45279	0	0	0	0	2.34293	452.79	0	0
AK9	NM_001145128	6326	0	0.226078	0	0.225618	0	0	226.078	226.078	0	0
AKAP1	NM_001242903	4287	7.17858	13.792	5.43093	5.32951	6.43472	5.66947	1.92101	2.53906	1.20715	1.13478
AKAP10	NM_007202	4062	3.18519	5.56556	4.62346	3.26106	6.29964	0	1.74678	1.20351	1.93118	6299.64
AKAP11	NM_016248	9915	4.04114	3.74923	2.44896	2.68706	0.556142	0.408324	0.927535	1.53032	0.206894	1.35868
AKAP12	NM_005100	8466	76.2728	90.6629	30.719	72.6746	46.1071	15.366	1.18865	2.95126	0.634423	3.0004
AKAP13	NM_006738	13339	4.40505	9.08654	4.63269	4.57105	9.31322	4.86258	2.06229	1.96097	2.03699	1.91489
AKAP17A	NM_005088	3197	2.27198	4.4591	3.15549	2.52239	3.43961	3.78816	1.96178	1.41268	1.36309	0.907751
AKAP3	NM_006422	3318	0.122037	1.7245	0.915231	0.430361	0	0	14.0161	1.88217	0	0
AKAP6	NM_004274	14983	0.272825	0.275391	0	0.183283	0	0.779962	1.00572	275.391	0	0
AKAP7	NM_001376570	2281	0.137981	0.487418	0	0.32445	1.88037	1.38065	3.50708	487.418	5.77777	1.36097
AKAP8	NM_005858	3664	2.97156	4.17202	1.71428	2.82129	3.11438	1.14329	1.40351	2.43226	1.1035	2.72166
AKAP8L	NM_014371	2078	10.6128	12.7125	13.7228	14.196	4.98612	10.9829	1.19774	0.926308	0.35121	0.45395
AKAP9	NM_005751	12463	2.46924	2.18074	0.649765	1.10751	1.10668	0.975091	0.882802	3.35104	0.998348	1.13378
AKIP1	NM_020642	1273	0.619092	1.82267	0.773788	2.54735	0	3.09694	2.93936	2.35248	0	0
AKIRIN1	NM_024595	2688	5.94176	4.63532	2.41366	5.06375	1.01192	0	0.779995	1.91966	0.199796	1011.92
AKIRIN2	NM_018064	1898	5.44937	11.1061	2.61971	11.3333	12.8505	9.4352	2.03768	4.23782	1.13377	1.36183
AKNA	NM_001317950	7454	1.55621	7.5485	1.66733	5.13973	16.1556	0	4.84745	4.52459	3.14267	16155.6
AKR1A1	NM_001202413	1363	7.17596	6.63938	7.68827	9.64042	13.9675	20.5107	0.925097	0.863461	1.4487	0.680953
AKR1B1	NM_001628	1361	0.555063	0.980366	4.85674	0.652476	0	0	1.76305	0.201815	0	0
AKR1C3	NM_003739	1186	0	0.396951	0	0	0	0	396.951	396.951	0	0
AKR7A2	NM_003689	2619	3.09224	2.54886	1.54596	1.63568	5.26643	1.5467	0.824011	1.64766	3.21776	3.40274
AKR7A3	NM_012067	1215	0	0.576254	0	0	0	0	576.254	576.254	0	0
AKR7L	NR_040288	2362	0	0.100892	0	0	0	0	100.892	100.892	0	0
AKT1	NM_005163	2988	13.823	20.8253	10.8411	13.939	36.4671	20.3356	1.50646	1.92078	2.61601	1.79318
AKT1S1	NM_032375	2447	6.45374	8.96353	11.1694	8.36445	27.0559	28.1425	1.38867	0.802432	3.23425	0.961356
AKT2	NM_001626	5250	7.86942	21.6822	13.3698	11.3611	30.4484	10.7004	2.75489	1.62161	2.67983	2.84528
AKTIP	NM_001308325	2482	0.489337	0.576254	0	0.3835	0	0	1.17522	576.254	0	0
ALAD	NM_001003945	3349	2.05547	2.70514	2.72031	2.13195	13.1792	2.41914	1.31543	0.994057	6.17888	5.44565
ALAS1	NM_001304444	2441	7.13313	7.6183	4.56174	7.99503	6.78056	13.276	1.06787	1.66968	0.84799	0.510698
ALCAM	NM_001627	4701	5.52552	3.78739	3.711	6.78607	3.37094	9.07526	0.685312	1.02031	0.49667	0.371402
ALDH16A1	NM_153329	3099	2.08592	4.29847	1.95541	2.75851	3.55258	15.6505	2.05972	2.19712	1.28739	0.226981
ALDH18A1	NM_002860	3350	7.48355	5.23224	6.43073	4.67331	7.96586	0	0.699072	0.813505	1.70418	7965.86
ALDH1A3	NM_000693	3468	11.6753	10.7078	12.629	8.57766	13.0013	4.49219	0.917052	0.847806	1.51554	2.89356
ALDH1B1	NM_000692	3027	4.08889	3.72757	1.31891	3.72113	1.79708	1.31946	0.911409	2.8241	0.482809	1.36095
ALDH1L2	NM_001034173	7428	1.02048	0.442728	0.134175	1.01014	0.731799	0	0.433417	3.27521	0.723739	731.799
ALDH2	NM_000690	9560	4.91415	4.16631	3.43976	4.39025	2.6782	5.89927	0.847646	1.21087	0.609895	0.453911
ALDH3A2	NM_001031806	3828	7.41435	5.73734	6.61971	6.84797	0.721529	2.11915	0.773711	0.866575	0.105349	0.34032
ALDH3B1	NM_000694	2811	1.28356	1.25965	0.713103	2.17961	0	0	0.980615	1.76397	0	0
ALDH4A1	NM_003748	3139	1.53764	1.60947	0.426985	3.41427	0	20.5107	1.04603	3.76057	0	0
ALDH5A1	NM_170740	5170	1.25311	0.55332	1.3706	0.644447	0	0	0.441205	0.403413	0	0
ALDH6A1	NM_005589	5462	0.950942	0.610791	0.648265	0.711307	0	2.59447	0.641626	0.940743	0	0
ALDH7A1	NM_001182	4765	1.01175	0.676149	0.615154	0.578535	0.838276	0	0.667637	1.09737	1.44646	838.276
ALDH9A1	NM_000696	2500	4.85902	3.43314	2.42946	2.66552	0	0	0.706404	1.41254	0	0
ALDOA	NM_001243177	3433	56.312	53.9286	32.3214	55.2994	85.161	51.4247	0.957658	1.66846	1.53997	1.656
ALDOC	NM_005165	1608	5.39577	2.02165	9.19696	4.9012	6.68334	36.8037	0.374603	0.219793	1.36334	0.181589
ALG1	NM_019109	3900	0.51461	0.605987	0.257275	0.604958	0.701178	0	1.17528	2.34628	1.15714	701.178
ALG10	NM_032834	2912	0.258916	0	0.323613	0.152188	0	0	0	0	0	0
ALG10B	NM_001013620	10050	0.401901	0.189275	0.100257	0.0943787	0	0	0.469779	1.86926	0	0
ALG11	NM_001004127	6510	1.10504	1.67301	1.57861	0.371091	0	0	1.51262	1.05913	0	0
ALG12	NM_024105	5330	2.7302	6.22911	2.55949	1.40407	1.16244	0	2.28073	2.43278	0.827312	1162.44
ALG13	NM_001099922	4111	3.01532	3.09248	2.18846	1.48641	1.32524	1.9461	1.02525	1.41244	0.890971	0.680623
ALG14	NM_001305242	9412	1.53238	0	0	0	15.6589	0	0	0	15658.9	15658.9
ALG1L	NM_001195223	921	0	0	0	0	0	0	0	0	0	0
ALG1L2	NM_001136152	969	0	0	0	0	0	0	0	0	0	0
ALG3	NM_005787	1552	5.01872	4.66551	2.64128	1.8629	0	2.64244	0.929436	1.76571	0	0
ALG5	NM_013338	1219	3.00438	3.93098	0	0.78481	0	0	1.30798	3930.98	0	0
ALG6	NM_013339	3324	2.28224	1.41448	0.90081	0.564812	0	0	0.619505	1.56849	0	0
ALG8	NM_024079	1637	4.85529	2.28689	1.82066	0.85605	1.65381	0	0.470912	1.25539	1.92965	1653.81
ALG9	NM_001352417	5830	1.52797	1.3086	0.520896	0.816416	0	1.38964	0.855873	2.5074	0	0
ALKBH1	NM_006020	2597	2.03639	0.55332	0.391566	0.736416	1.06711	0	0.271583	1.40949	1.44709	1067.11
ALKBH2	NM_001145375	944	3.04458	3.18676	8.45686	0.397588	0	0	1.04636	0.37678	0	0
ALKBH3	NM_139178	1544	1.80656	0.911654	1.2903	1.21349	0	2.58181	0.504356	0.705997	0	0
ALKBH4	NM_017621	2087	1.52729	3.14732	0.954457	0.673205	1.30054	0	2.05937	3.29405	1.929	1300.54
ALKBH5	NM_017758	3158	13.2697	19.3065	16.5127	9.84436	27.3206	7.07981	1.45482	1.16912	2.77498	3.85841
ALKBH6	NM_032878	977	3.3157	5.36858	2.07216	3.41041	8.47053	0	1.61865	2.58956	2.483	8470.53
ALKBH7	NM_032306	970	4.25918	4.29892	1.52104	1.07284	4.14507	3.04343	1.00909	2.82445	3.86006	1.36153
ALKBH8	NM_001301010	4038	1.60447	0.118025	0	0.589338	0	0	0.0735142	118.025	0	0
ALMS1	NM_015120	12925	1.94242	2.58231	1.87961	1.43626	0.213397	0.313355	1.32874	1.37312	0.148474	0.678839
ALOX12B	NM_001139	2515	0.809145	1.71516	0	0.570725	0	1.61904	2.11711	1715.16	0	0
ALOX5	NM_000698	2517	0.314974	2.59645	0	1.29597	3.21884	0	8.2173	2596.45	2.48181	3218.84
ALOXE3	NM_001165960	3397	0.59594	0.280648	0	0.280216	0.812004	0	0.470145	280.648	2.88747	812.004
ALPK1	NM_025144	5399	1.04745	2.20258	0.187015	1.58312	1.52912	0	2.10079	11.7149	0.965279	1529.12
ALS2	NM_020919	6675	2.80958	4.34225	1.17055	1.92655	1.99372	0	1.54497	3.70643	1.03433	1993.72
ALS2CL	NM_001190707	5067	2.12815	4.14464	2.86476	5.58068	21.1898	0.818794	1.94662	1.44626	3.79631	25.8477
ALYREF	NM_005782	1097	18.4563	13.2573	8.7664	9.5459	0	0	0.718267	1.51211	0	0
AMACR	NM_001167595	2538	0.466609	0.18311	0.388797	1.09707	2.11954	0	0.391589	0.469758	1.93024	2119.54
AMBRA1	NM_001267782	5258	4.57891	7.81827	2.09858	1.97356	11.4377	1.52684	1.70708	3.72373	5.79255	7.48623
AMD1	NM_001634	3423	8.51735	4.50397	3.25298	5.00608	2.41768	4.73369	0.528738	1.38414	0.482851	0.51063
AMDHD1	NM_152435	2226	0.568717	0.223177	0	0.668534	0	0	0.391734	223.177	0	0
AMDHD2	NM_001145815	2068	3.70421	4.36183	6.82334	3.43756	13.2816	1.95032	1.17722	0.639159	3.86254	6.80645
AMER1	NM_152424	8407	0.863252	1.07301	1.79839	0.507368	0	2.39893	1.24155	0.596318	0	0
AMFR	NM_001323512	3703	8.21696	10.708	9.3121	8.30671	14.181	8.76806	1.303	1.14977	1.70697	1.61716
AMIGO3	NM_198722	2856	2.72494	4.81317	8.17455	1.60159	5.5691	1.36299	1.76569	0.588728	3.47506	4.08294
AMMECR1	NM_015365	5350	2.01824	1.84851	2.05555	0.790796	0	0	0.915448	0.89884	0	0
AMMECR1L	NM_031445	4647	2.85834	8.05758	5.84638	1.42539	7.67088	16.4634	2.81799	1.37798	5.37783	0.465908
AMOT	NM_001113490	6945	1.51593	1.51039	1.16605	0.685322	0	0.583241	0.995689	1.2942	0	0
AMOTL1	NM_130847	8980	4.99472	6.67628	5.90568	3.43807	4.29156	3.60113	1.3364	1.13029	1.24788	1.1914
AMOTL2	NM_001278683	4991	2.92076	4.49019	2.83949	3.43325	4.42166	1.62326	1.53681	1.58078	1.28752	2.72227
AMPD2	NM_001368809	4081	3.25897	6.83582	4.32811	2.75348	1.38761	16.3013	2.0969	1.57904	0.503767	0.0851179
AMPD3	NM_000480	4357	1.29696	3.70898	0.694759	1.19787	0	0.926706	2.85756	5.33084	0	0
AMZ2	NM_001033570	1423	5.30231	4.38141	4.18586	2.95238	0	0	0.826166	1.04647	0	0
ANAPC1	NM_022662	7762	0.83747	1.12994	0.13083	0.122992	3.20927	0	1.34762	8.57118	25.8829	3209.27
ANAPC10	NM_001318367	1506	0.537677	0.633181	0	0.632111	0	0	1.17544	633.181	0	0
ANAPC11	NM_001002244	1186	8.8771	12.8655	4.26766	4.81616	18.6076	3.41555	1.44913	3.01395	3.86277	5.44631
ANAPC13	NM_015391	1170	5.3632	2.36829	4.1899	1.97013	0	0	0.441499	0.565103	0	0
ANAPC15	NM_001330321	1692	0.913034	1.61264	2.28248	0.268246	0	0	1.76431	0.70622	0	0
ANAPC16	NM_001366791	3325	5.73559	2.55149	1.27449	4.19507	0	0	0.444774	2.00039	0	0
ANAPC2	NM_013366	2655	5.84898	10.2429	2.99928	4.23106	6.13016	3.00058	1.75094	3.414	1.44851	2.04231
ANAPC4	NM_001286756	2638	3.78435	3.38682	3.40573	1.7794	0	4.54299	0.894717	0.994156	0	0
ANAPC5	NM_016237	2574	11.2609	9.80901	9.64079	6.5279	11.5597	18.5182	0.870987	1.01734	1.77055	0.624201
ANAPC7	NM_016238	3045	5.45225	4.54114	2.65951	3.59537	0.90588	3.99097	0.83274	1.70687	0.251888	0.226926
ANG	NM_001145	1222	0.994024	0	0	0	0	0	0	0	0	0
ANGEL1	NM_001370746	2650	5.61449	8.46713	9.8495	1.50517	2.01306	6.89755	1.50782	0.859564	1.33654	0.291809
ANGEL2	NM_144567	4690	2.32719	1.31939	0.215396	0.911816	0	0.862194	0.566702	6.09712	0	0
ANGPT2	NM_001147	5270	1.3062	1.80953	1.9208	1.53546	0	1.53729	1.38428	0.941582	0	0
ANGPTL4	NM_139314	1872	2.12561	2.00243	0.531279	1.49918	0	0	0.941608	3.76199	0	0
ANGPTL6	NM_001321411	1779	1.09028	0.513525	2.18038	0.512623	1.48546	8.72556	0.470571	0.235413	2.89212	0.170223
ANK1	NM_001142446	8457	0	0.0562022	0.119293	0.0561309	0.650712	0.477751	56.2022	0.467212	11.3898	1.35919
ANK2	NM_001354235	8293	0.374763	1.15849	0.351302	0.771015	3.19169	2.8121	3.08304	3.28834	4.13423	1.13458
ANK3	NM_020987	17019	0.37824	0.584594	0.0590695	0.250071	0	0.946019	1.54149	9.73195	0	0
ANKDD1A	NM_182703	3101	2.08388	2.60724	2.9304	2.60275	0.887168	0	1.25055	0.889417	0.340727	887.168
ANKEF1	NM_198798	5363	1.3581	1.10718	0.522281	0.491163	0.7117	0	0.814644	2.11585	1.44607	711.7
ANKFY1	NM_001257999	7714	4.25189	7.4176	4.06795	3.20866	2.50324	6.30158	1.74413	1.82298	0.779908	0.397177
ANKH	NM_054027	8207	2.51411	5.63092	3.20417	2.89742	6.38092	5.42478	2.23884	1.75682	2.20152	1.17604
ANKHD1	NM_017747	8195	7.88087	14.7902	4.30965	5.09521	8.05325	1.97095	1.87649	3.43109	1.58024	4.08391
ANKHD1-EIF4EBP3	NM_020690	8349	7.95406	14.9062	4.00104	5.13112	8.59062	1.9407	1.8738	3.72465	1.67389	4.42428
ANKIB1	NM_019004	6340	5.79326	5.88084	2.164	4.38346	4.99003	1.33226	1.01494	2.71632	1.13812	3.74272
ANKLE1	NM_152363	2962	1.00666	3.40803	1.25823	1.03532	3.4289	1.25875	3.38212	2.70645	3.30873	2.72189
ANKLE2	NM_015114	4588	6.14351	7.65982	7.67904	4.99149	7.38572	0	1.24661	0.997367	1.47937	7385.72
ANKMY1	NM_001282771	3405	2.23781	4.29947	2.94436	2.49209	9.62856	29.4565	1.92043	1.45974	3.86209	0.326863
ANKMY2	NM_020319	2488	3.6451	0.933047	1.58472	0.931451	2.15936	0	0.255903	0.588404	2.31579	2159.36
ANKRA2	NM_023039	2160	1.10529	0.867689	0.460442	0.649629	0	1.84296	0.784323	1.88039	0	0
ANKRD10	NM_017664	2495	11.9897	16.3774	17.5841	9.02006	3.26717	9.59537	1.36584	0.931321	0.362171	0.340459
ANKRD11	NM_001256183	9296	6.04565	13.5468	8.69845	10.9924	70.2238	10.8777	2.24038	1.5572	6.38783	6.45515
ANKRD12	NM_015208	11284	1.61083	1.2224	1.07375	0.883568	4.87725	12.5336	0.758393	1.13738	5.51371	0.389103
ANKRD13A	NM_033121	4241	1.96863	2.56228	2.07216	3.7758	0	0	1.30089	1.23593	0	0
ANKRD13B	NM_152345	3550	3.57326	8.11487	7.01866	4.2004	14.7796	11.49	2.27036	1.15602	3.51777	1.28619
ANKRD13C	NM_030816	5658	3.00107	2.18763	3.21525	1.93181	0.973484	0.714757	0.728706	0.680179	0.503664	1.36008
ANKRD13D	NM_207354	2128	4.35205	8.91267	2.83811	4.00369	19.3358	7.57168	2.04746	3.13925	4.8283	2.55336
ANKRD16	NM_019046	2734	0.924483	2.72155	0	1.08663	5.24841	1.54137	2.94068	2721.55	4.82554	3.40282
ANKRD17	NM_032217	10797	7.06147	8.87596	7.48775	4.01055	12.4321	7.93736	1.25678	1.18524	3.09907	1.56607
ANKRD18A	NM_001331100	4157	0.479584	2.24029	2.15834	0.451018	9.80301	0	4.6616	1.03749	21.6872	9803.01
ANKRD24	NM_133475	4026	0.40224	0.355252	0.502783	1.65517	0	0	0.880994	0.705169	0	0
ANKRD26	NM_014915	6775	1.25438	1.7584	1.1447	0.70211	0.406884	0	1.40069	1.53478	0.578691	406.884
ANKRD27	NM_032139	4432	4.63759	10.2797	5.00118	3.42055	2.47791	0	2.21611	2.05503	0.724206	2477.91
ANKRD28	NM_001349277	7753	2.84944	2.5165	2.54403	1.73458	1.73319	1.01794	0.882847	0.988791	0.998624	1.70098
ANKRD33B	NM_001164440	9586	1.38838	5.67098	1.19304	2.091	4.43357	0.434004	4.08167	4.7494	2.1193	10.192
ANKRD34A	NM_001039888	3607	0.448121	0.923529	0.560122	0.658534	9.15961	0	2.0563	1.64586	13.888	9159.61
ANKRD36	NM_001354587	6533	0.309885	0	0.154942	0	0	0	0	0	0	0
ANKRD36B	NM_025190	5986	0.202859	0.39822	0.169017	0	0	0	1.95341	2.34223	0	0
ANKRD36C	NM_001310154	8192	0.100327	0.236231	0	0	0	3.01103	2.33137	236.231	0	0
ANKRD37	NM_181726	780	0.858757	1.51692	0	0.50474	5.85061	0	1.76435	1516.92	11.5684	5850.61
ANKRD39	NM_016466	892	1.80359	2.1239	14.6545	1.06006	12.2877	0	1.17694	0.144921	11.5805	12287.7
ANKRD40	NM_052855	4166	10.1015	15.0975	10.441	6.73629	4.63178	10.6883	1.49443	1.44584	0.687485	0.433311
ANKRD42	NM_001300972	2677	1.06916	2.33819	0.763635	0.718168	0	0	2.18489	3.05792	0	0
ANKRD44	NM_001367495	7419	0.132638	0.624932	0.165787	0.233939	0.903738	0.663604	4.67629	3.74689	3.84669	1.35981
ANKRD46	NM_001270379	1703	0.936186	0	0.585042	1.1005	1.59452	0	0	0	1.44759	1594.52
ANKRD49	NM_017704	1908	0.425053	0.750843	0	0	0	0	1.76232	750.843	0	0
ANKRD50	NM_020337	8797	4.28081	3.57736	1.26573	1.83969	1.2543	0.460446	0.835479	2.8241	0.681427	2.71819
ANKRD52	NM_173595	8681	9.37942	19.418	23.6232	4.83915	3.50558	21.0592	2.07005	0.821952	0.72427	0.166455
ANKRD54	NM_001349853	2753	3.31308	4.11799	0.460096	3.02902	1.25385	5.5239	1.24258	8.93087	0.41381	0.226946
ANKRD6	NM_001242811	5738	1.36107	1.8699	0.945112	0.799993	1.54538	0	1.37284	1.97641	1.92933	1545.38
ANKRD9	NM_001348652	6498	1.66671	8.93008	2.49996	4.50624	14.7608	2.50103	5.35468	3.57067	3.27492	5.89955
ANKS1A	NM_015245	6350	4.78177	6.60693	3.50656	4.57178	3.90918	1.27564	1.3814	1.88363	0.854881	3.06209
ANKS3	NM_133450	2772	2.73596	3.75866	3.79983	3.03749	12.426	4.56175	1.3733	0.988904	4.08954	2.72336
ANKS6	NM_173551	7190	5.02143	13.0219	4.23132	4.77514	17.6807	2.25765	2.59274	3.07677	3.70189	7.828
ANKZF1	NM_001042410	2598	5.6524	4.62218	2.74754	4.98324	2.13926	15.7071	0.817593	1.68168	0.429205	0.136188
ANLN	NM_018685	4731	7.86188	4.77818	5.28326	1.19247	0	0.845651	0.607689	0.90423	0	0
ANO1	NM_001378092	4878	2.35806	2.87601	4.00023	2.17801	0.57372	1.685	1.21913	0.718782	0.263294	0.340284
ANO10	NM_001346464	2860	1.84057	4.50143	3.18548	1.66429	0.964538	0	2.44435	1.41266	0.579201	964.538
ANO5	NM_213599	6742	0.790233	0.429494	0.151942	0.928969	1.65652	0.608091	0.542816	2.8082	1.78126	2.71966
ANO6	NM_001204803	6061	4.33076	3.70889	1.96845	4.31952	3.57614	0.656406	0.856209	1.88322	0.827711	5.43978
ANO8	NM_020959	4178	4.97385	10.1062	4.38845	5.9614	36.5419	8.78073	2.03145	2.30237	6.12871	4.16112
ANO9	NM_001012302	2867	9.15493	12.2731	7.39407	14.404	37.4207	2.81798	1.34045	1.65963	2.59775	13.2745
ANP32A	NM_006305	2439	11.3302	6.96091	14.3674	4.43952	21.2542	29.5684	0.614312	0.48446	4.78643	0.718792
ANP32B	NM_006401	1482	8.01843	6.49144	6.8906	3.68186	1.70698	5.01341	0.809465	0.941936	0.463494	0.340416
ANP32C	NM_012403	705	0	0	0	0	0	0	0	0	0	0
ANP32E	NM_030920	3407	12.6725	8.98111	9.23988	4.68959	1.59868	10.5644	0.708654	0.971889	0.340827	0.151313
ANTXR1	NM_032208	5893	3.71057	4.36936	4.46621	2.26158	1.40431	4.12436	1.17723	0.978096	0.620666	0.340409
ANTXR2	NM_001145794	2304	2.2847	2.69036	0.439329	1.03291	0	0	1.17704	6.10989	0	0
ANXA1	NM_000700	1401	46.1349	29.4913	12.5218	21.3826	8.97973	7.91182	0.639226	2.35501	0.419935	1.13483
ANXA10	NM_007193	1441	5.59685	2.30665	0.699374	1.97363	0	0	0.41206	3.29345	0	0
ANXA11	NM_001278408	3072	9.696	20.5129	6.16238	12.1703	32.467	8.21999	2.11539	3.32819	2.6675	3.94929
ANXA2	NM_001002858	1626	9.04816	9.0908	12.7626	2.92734	11.8758	12.4565	1.0046	0.712244	4.05547	0.953307
ANXA3	NM_005139	1430	3.50372	1.47349	2.50238	3.82434	0	0	0.420431	0.588603	0	0
ANXA4	NM_001153	2651	2.34195	2.48196	2.04909	0.550579	0.797701	0	1.05933	1.21066	1.44621	797.701
ANXA5	NM_001154	1638	24.0579	9.84073	13.9276	23.2193	15.5267	5.06671	0.409026	0.706513	0.668667	3.06385
ANXA6	NM_001155	2889	6.9022	9.56199	5.75143	4.13631	0.921947	5.41557	1.38515	1.66225	0.222837	0.170209
ANXA7	NM_004034	2509	10.3788	7.89695	4.39076	5.06776	1.08771	1.5973	0.760801	1.79813	0.214591	0.680542
ANXA9	NM_003568	1550	0.66599	0.522771	0	0.782839	1.51236	0	0.783776	522.771	1.92943	1512.36
AOC2	NM_009590	2677	4.081	11.9251	4.91211	3.37581	10.297	1.51202	2.92139	2.4272	3.04934	6.8056
AP1AR	NM_018569	5915	4.95638	1.19919	2.88541	2.15487	0	3.39603	0.2419	0.415462	0	0
AP1B1	NM_001127	4178	6.39666	10.3856	6.29956	5.81038	5.28206	11.6348	1.62335	1.64837	0.908915	0.453947
AP1G1	NM_001030007	6609	6.74098	5.77931	3.69554	3.30165	4.43111	1.77457	0.857212	1.56344	1.34169	2.4956
AP1G2	NM_003917	2598	6.73097	12.6097	7.26613	7.55263	18.7587	0	1.8731	1.73517	2.48341	18758.7
AP1M1	NM_001130524	12892	4.74199	4.58673	8.04407	4.37967	5.76864	11.8595	0.967055	0.57013	1.31684	0.486376
AP1M2	NM_001300887	1754	8.52727	10.5841	7.48983	6.77286	10.9903	6.91666	1.24105	1.41293	1.62246	1.58874
AP1S1	NM_001283	1226	20.7896	19.3654	13.9626	18.2374	48.6186	74.4987	0.931448	1.38685	2.66573	0.652602
AP1S2	NM_001369007	3501	1.21698	0.204685	0	0	0.59218	1.73927	0.168052	204.685	592.18	0.340281
AP2A1	NM_014203	3423	10.0105	18.1247	6.65409	11.2911	28.3821	15.0503	1.81039	2.72343	2.51344	1.88569
AP2A2	NM_001242837	4656	5.87043	9.72905	6.08762	9.81436	13.627	8.7003	1.65701	1.59791	1.38833	1.56608
AP2B1	NM_001030006	5698	12.7178	11.9145	10.8905	6.6076	3.35065	0	0.936766	1.09393	0.507013	3350.65
AP2M1	NM_001311198	2015	22.3064	25.0838	15.5737	17.0083	23.2733	42.2174	1.12446	1.61055	1.36827	0.551261
AP2S1	NM_001301076	918	14.8598	22.9665	11.6088	10.3714	18.981	4.64544	1.54544	1.9782	1.82995	4.08507
AP3B1	NM_003664	3980	5.71736	5.43321	2.75827	2.47604	2.7332	1.0034	0.950135	1.96908	1.10342	2.72123
AP3D1	NM_001261826	5065	13.7479	24.3298	14.419	15.5105	35.5251	18.1794	1.76958	1.68723	2.29024	1.95403
AP3M1	NM_012095	4889	3.72795	3.16065	2.23668	1.75276	0	0	0.847597	1.41247	0	0
AP3M2	NM_001134296	3670	3.81267	4.62163	1.12128	0.922692	0.763931	1.12177	1.21186	4.11807	0.827041	0.680401
AP3S1	NM_001364119	1312	10.344	11.2894	1.89207	9.78684	1.7187	8.41214	1.09129	5.96353	0.175596	0.204288
AP4B1	NM_006594	3253	1.71989	1.73601	0.614231	0.866488	0	1.22899	1.00879	2.82173	0	0
AP4E1	NM_007347	6743	1.37786	2.04585	0.748752	1.05634	1.22437	1.1986	1.48372	2.7287	1.15797	1.02065
AP4M1	NM_001363671	1744	1.73414	1.53151	4.33526	3.31252	0	0	0.882645	0.353187	0	0
AP4S1	NM_007077	1789	0.905231	1.59913	0	2.39458	4.62586	2.2643	1.7646	1599.13	1.931	2.04205
AP5B1	NM_138368	6980	3.92954	10.556	11.205	7.00096	4.6011	6.75655	2.68562	0.941993	0.657117	0.680883
AP5M1	NM_018229	11675	4.4483	3.38936	1.63526	1.99932	0	0	0.761772	2.07141	0	0
AP5S1	NM_001204447	5316	1.52059	2.55802	1.62914	1.7875	0	8.69282	1.68114	1.5692	0	0
AP5Z1	NM_014855	5529	2.34772	5.2269	1.65072	3.27734	1.99933	2.93593	2.22543	3.16452	0.609859	0.680753
APAF1	NM_181861	7201	2.47764	2.98388	2.39312	1.05904	6.90505	1.68985	1.20384	1.24634	6.51395	4.08378
APBA3	NM_004886	2176	2.25163	4.41912	2.34536	5.07316	0	0	1.96176	1.8834	0	0
APBB1	NM_001164	2666	1.81038	0.710595	3.01704	1.41875	5.13891	15.0926	0.392295	0.235449	3.6196	0.34047
APBB2	NM_004307	8899	3.65451	4.09089	1.91734	3.44727	9.22085	8.57556	1.1191	2.13252	2.67405	1.07512
APBB3	NM_006051	2158	3.00226	6.40778	3.75264	2.86742	15.3396	1.87709	2.13361	1.70708	5.34776	8.16768
APC	NM_001354896	10758	1.65213	1.23799	0.750944	0.838605	0.767396	1.87812	0.748877	1.64638	0.913996	0.40838
APC2	NM_005883	10151	1.23657	3.47602	8.07753	2.39144	9.23963	14.3662	2.80874	0.430278	3.86201	0.643107
APEH	NM_001640	2879	8.36877	15.9058	10.2771	7.5938	17.0036	7.34381	1.90038	1.54755	2.23884	2.31504
APEX1	NM_080649	1397	16.3388	22.1258	24.5074	7.36241	0	8.1725	1.35411	0.902785	0	0
APEX2	NM_014481	3239	3.09249	7.28326	5.79827	3.18085	1.31673	0	2.35438	1.25589	0.413827	1316.73
APH1A	NM_001077628	1730	9.87121	14.839	14.1762	7.40657	5.72315	23.1117	1.50311	1.04668	0.772608	0.247619
APH1B	NM_031301	4138	0.482807	0.454875	0.965648	0.681089	0	0	0.9402	0.47057	0	0
API5	NM_001142930	3726	2.36425	1.13891	1.61184	0.757949	2.19628	0	0.481517	0.706154	2.89384	2196.28
APIP	NM_015957	1245	0.634188	0.373382	1.58542	1.11824	0	0	0.587829	0.235362	0	0
APLP1	NM_001024807	2370	4.52794	3.99888	2.42554	11.7858	39.6601	118.096	0.882961	1.64797	3.36479	0.335825
APLP2	NM_001642	3733	24.3964	24.5169	24.6965	25.3482	11.5784	22.3158	1.0049	0.992686	0.456758	0.51882
APMAP	NM_020531	2202	10.3922	13.3108	10.9387	9.21561	12.4204	1.82386	1.28072	1.21674	1.34761	6.80624
APOBEC3A	NM_145699	1358	0	0	0	0	0	0	0	0	0	0
APOBEC3B	NM_004900	1590	0	0.620037	0	0	0	0	620.037	620.037	0	0
APOBEC3C	NM_014508	2644	2.55583	5.58949	8.21516	1.93144	2.48742	3.6527	2.1861	0.680304	1.28719	0.680796
APOBEC3D	NM_152426	2515	0.80889	0.952446	0.808745	0.570506	0	3.23676	1.17602	1.17623	0	0
APOBEC3F	NM_145298	4494	1.33817	1.32166	0.107871	0.761161	0.588148	0.863717	0.986922	12.1397	0.771685	0.680163
APOBEC3G	NM_021822	1564	0	0.259981	0	0.518973	0	0	259.981	259.981	0	0
APOBEC3H	NM_001166003	1123	0	0	0.885466	0	0	0	0	0	0	0
APOD	NM_001647	862	0.35831	0	0	1.26364	0	0	0	0	0	0
APOL2	NM_145637	2686	0.150702	0.710051	0.376799	0.177152	0	0	4.68056	1.87944	0	0
APOL6	NM_030641	10065	0.119748	0	0	0.140729	0	0	0	0	0	0
APOLD1	NM_001130415	4737	0.6838	1.20789	0.640997	0.200947	0	0.855134	1.76386	1.88147	0	0
APOO	NM_024122	1114	1.07595	1.68933	0.896541	0	0	0	1.56863	1.88217	0	0
APOOL	NM_198450	6480	5.00922	2.50689	3.91324	2.20808	0	0	0.500355	0.640454	0	0
APP	NM_000484	3583	16.496	15.6186	32.322	15.1983	26.5759	103.697	0.946753	0.483204	1.74849	0.256282
APPBP2	NM_006380	6492	5.7322	3.9618	1.869	3.88179	0.848924	1.24657	0.691028	2.11861	0.218638	0.680463
APPL1	NM_012096	6068	3.74195	2.12444	2.00444	1.80655	0.910417	2.00535	0.567586	1.05934	0.503674	0.453768
APPL2	NM_001251904	3248	2.86741	3.81695	0.311615	3.95675	10.1918	3.7415	1.33068	12.2097	2.57514	2.72324
APRT	NM_000485	931	20.071	29.5432	11.2893	23.0035	17.0916	5.01964	1.47187	2.61669	0.742966	3.40427
APTX	NM_001195249	2169	5.46658	3.57618	3.54302	3.33194	2.75853	2.02542	0.65407	1.00908	0.827657	1.36128
AQP3	NM_004925	1824	0.865626	2.5485	1.08206	1.01751	2.94874	17.3206	2.94071	2.35306	2.89516	0.170235
AQR	NM_014691	9597	3.82607	4.78698	0.996337	1.40546	0.542974	0	1.25082	4.79976	0.386057	542.974
ARAF	NM_001256196	2505	3.55622	3.99734	2.02048	2.2802	4.40491	12.9368	1.12373	1.97743	1.93096	0.340468
ARAP1	NM_001040118	5137	5.28136	14.2018	2.56168	6.67154	19.3321	3.15425	2.68852	5.54176	2.89726	6.12696
ARAP3	NM_022481	5258	2.30862	7.15871	2.11612	2.44239	6.29095	0	3.09952	3.38135	2.57468	6290.95
ARC	NM_015193	2950	2.19769	5.17577	0	3.71361	18.7149	0	2.35402	5175.77	5.03818	18714.9
ARCN1	NM_001655	3993	13.7162	8.7883	10.5892	5.45345	4.12239	4.03569	0.640678	0.829849	0.755785	1.02123
AREG	NM_001657	1233	71.0853	82.2118	10.3133	157.795	84.314	22.2226	1.15651	7.97067	0.534322	3.79389
AREL1	NM_001039479	5417	5.80064	11.7346	6.87871	4.72061	4.05296	5.95167	2.02263	1.70568	0.858385	0.680864
ARF1	NM_001658	1840	30.4199	39.1042	36.9957	25.5898	39.45	25.747	1.28544	1.05696	1.54157	1.53216
ARF3	NM_001659	4041	34.1165	58.9126	70.1191	16.6201	23.3976	100.212	1.72676	0.840167	1.4077	0.233478
ARF4	NM_001660	1596	10.2396	4.93256	3.78149	9.30108	0	2.32805	0.481666	1.30405	0	0
ARF5	NM_001662	1032	28.0791	37.4153	14.7779	23.8867	40.2712	64.6808	1.33245	2.53168	1.68586	0.622606
ARF6	NM_001663	3875	7.45302	9.07892	7.19575	8.82145	2.80125	8.74134	1.21799	1.26153	0.317514	0.320423
ARFGAP1	NM_175609	3274	6.37682	15.1626	6.43777	8.21678	11.6959	12.2678	2.3774	2.3549	1.42325	0.953308
ARFGAP2	NM_032389	2773	5.62772	10.7294	8.70929	4.72528	16.431	4.02136	1.90618	1.2318	3.47651	4.08491
ARFGAP3	NM_014570	2727	3.00158	2.01974	6.78907	1.5121	0	0	0.67267	0.297455	0	0
ARFGEF1	NM_006421	7318	3.41875	6.89664	4.06311	3.82113	3.81802	1.12121	2.01671	1.69696	0.998923	3.40222
ARFGEF2	NM_006420	9031	3.91258	6.03711	2.24845	2.11458	3.98284	0.89978	1.54261	2.68382	1.88262	4.42154
ARFGEF3	NM_020340	14859	1.33325	1.89039	1.08829	1.22605	2.96582	0.27217	1.41681	1.73544	2.41704	10.857
ARFIP1	NM_001287432	3230	4.63853	3.1001	1.2535	2.35786	0.854028	2.50823	0.668192	2.47119	0.362051	0.340355
ARFIP2	NM_001242854	3700	3.7902	4.33926	2.89521	2.97034	6.45526	1.05317	1.14456	1.49825	2.17251	6.12355
ARFRP1	NM_003224	2512	7.4163	13.1966	25.544	11.2364	35.9278	18.1356	1.77917	0.516604	3.19716	1.98095
ARG2	NM_001172	1908	2.24959	1.20409	1.02241	2.16356	1.39322	6.13767	0.535008	1.17654	0.643652	0.226958
ARGLU1	NM_018011	3363	12.4879	13.6159	23.7029	11.4173	7.87715	9.25377	1.09024	0.574415	0.689869	0.851145
ARHGAP1	NM_004308	3394	4.70027	11.8999	7.93147	3.72945	2.40155	7.05316	2.53121	1.50015	0.643768	0.340444
ARHGAP10	NM_024605	3270	3.44504	3.27659	3.64362	2.64786	4.51334	2.65103	0.950828	0.899021	1.70388	1.70184
ARHGAP11A	NM_014783	5876	2.29912	2.10124	0.857777	1.21013	0.467494	0.686585	0.913533	2.44678	0.385997	0.679908
ARHGAP12	NM_018287	5060	16.5779	10.7414	5.94872	8.11197	2.70176	0	0.647896	1.80537	0.333018	2701.76
ARHGAP17	NM_001006634	3493	2.94264	5.57136	2.30786	2.57735	4.71684	0	1.89268	2.41303	1.8294	4716.84
ARHGAP18	NM_033515	4412	11.5728	10.0844	15.3333	7.34599	0	8.10404	0.871314	0.657638	0	0
ARHGAP19	NM_032900	5438	3.91631	3.04543	4.24862	1.65035	0	1.47838	0.77743	0.716637	0	0
ARHGAP21	NM_020824	7381	0.395456	1.26401	0.141213	0.332041	5.3886	0	3.18826	8.88811	16.18	5388.6
ARHGAP22	NM_001256024	2777	1.84964	1.84289	1.06706	1.33794	1.93853	1.42328	0.995809	1.72546	1.4478	1.36105
ARHGAP26	NM_015071	9395	4.6152	7.82181	2.48	4.1069	6.46446	3.02045	1.69442	3.15269	1.57367	2.13952
ARHGAP29	NM_004815	8952	8.21052	7.59645	8.74021	3.81814	1.22928	2.70779	0.925097	0.869039	0.321874	0.453813
ARHGAP31	NM_020754	9307	0.651573	1.35746	0.751752	0.530214	0.341422	1.00278	2.08017	1.80334	0.64272	0.340137
ARHGAP32	NM_001378024	10280	3.56427	4.57432	2.20253	2.49509	6.27507	3.20506	1.28302	2.0759	2.51396	1.95726
ARHGAP33	NM_001366178	4352	2.17038	6.81524	2.32529	1.45787	9.153	1.03386	3.13866	2.92967	6.27403	8.84469
ARHGAP35	NM_004491	9289	6.15047	19.5817	5.1252	4.87346	23.5882	6.8365	3.18325	3.81992	4.83914	3.44982
ARHGAP39	NM_025251	4669	4.16284	11.2339	15.1767	4.99543	20.6789	19.0874	2.69797	0.740159	4.13874	1.08332
ARHGAP4	NM_001164741	3374	3.8427	9.75716	10.2069	6.91687	15.5436	2.4026	2.53848	0.955842	2.24687	6.46679
ARHGAP40	NM_001164431	2964	0.713398	1.34396	0	1.67721	0	0	1.88125	1343.96	0	0
ARHGAP42	NM_152432	8156	0.887931	0.580877	0.493207	0.695833	0	0	0.653456	1.17537	0	0
ARHGAP44	NM_014859	4270	1.71217	3.80833	2.14012	2.34808	5.83209	3.80629	2.22297	1.77867	2.48271	1.53182
ARHGAP45	NM_001258328	5351	4.50996	11.7724	6.20115	4.24127	8.70535	10.5275	2.60973	1.89811	2.05205	0.826833
ARHGAP5	NM_001030055	9589	2.19243	1.58871	2.21338	1.89984	1.14889	3.3743	0.724302	0.717452	0.604413	0.340382
ARHGAP8	NM_001017526	1725	9.15493	12.9918	9.38928	10.7617	6.39667	16.4382	1.41895	1.38353	0.59434	0.38911
ARHGDIA	NM_001301242	1725	39.6816	88.8079	78.3454	55.6566	168.955	76.6868	2.23796	1.13353	3.03562	2.20316
ARHGEF1	NM_199002	3174	5.12727	12.2225	9.69144	10.8782	25.5581	3.75306	2.38336	1.26104	2.34926	6.80813
ARHGEF10L	NM_018125	4625	1.53179	5.2521	2.02728	2.22421	9.2075	2.70412	3.4265	2.58943	4.1378	3.40373
ARHGEF11	NM_198236	7261	3.64433	8.02903	3.52663	2.14195	4.40472	0.588017	2.20255	2.27604	2.05544	7.47808
ARHGEF12	NM_015313	10326	13.1833	12.8072	5.14943	7.11884	8.41969	2.47279	0.971401	2.48663	1.18257	3.40356
ARHGEF16	NM_014448	2822	3.62542	6.89628	1.7429	4.58945	0.949921	2.78981	1.90168	3.95452	0.206934	0.340375
ARHGEF17	NM_014786	8163	1.55477	6.16402	1.81385	2.49786	12.7107	9.33255	3.96204	3.39644	5.08659	1.36183
ARHGEF18	NM_001367823	6681	2.82128	7.55811	2.46846	3.31647	3.3635	0.705551	2.67802	3.06063	1.01388	4.76045
ARHGEF19	NM_153213	3322	7.27204	16.4127	5.75674	5.12893	53.6688	21.8245	2.25664	2.85054	10.4619	2.459
ARHGEF2	NM_001162383	4169	3.67936	7.18319	3.14672	4.89426	9.89443	0.968584	1.95176	2.28203	2.02123	10.2048
ARHGEF26	NM_001251962	5254	2.62037	1.99654	0.770673	1.26831	1.05004	1.542	0.761639	2.58729	0.827249	0.680517
ARHGEF28	NM_001080479	6352	0.19124	0.825719	0.796746	0.824299	0.434228	0	4.29525	1.03506	0.526146	434.228
ARHGEF3	NM_001128615	3597	2.44804	2.09652	1.11263	2.74684	2.27415	0	0.856058	1.8826	0.827616	2274.15
ARHGEF35	NM_001368318	2471	0.163508	0.385438	0	0	0	0	2.34297	385.438	0	0
ARHGEF37	NM_001001669	4942	1.24845	2.15617	0.41614	0.880503	0.566979	0	1.7257	5.16894	0.643196	566.979
ARHGEF38	NM_001242729	5457	0.0742062	0	0.37103	0.0872255	0	0	0	0	0	0
ARHGEF39	NM_032818	3678	2.52869	2.28072	1.88307	1.39137	0.733059	1.0765	0.90158	1.21053	0.526481	0.680335
ARHGEF4	NM_001367493	6735	3.54426	8.47747	3.59943	4.4266	24.1451	4.43197	2.39121	2.35457	5.45331	5.44671
ARHGEF40	NM_018071	5892	0.955013	3.13273	1.19373	0.882036	4.18244	0.682363	3.27687	2.62211	4.73643	6.12037
ARHGEF5	NM_005435	5482	0.14748	0.434389	0	0.173429	0	0	2.92558	434.389	0	0
ARHGEF6	NM_004840	4859	0.230421	0.361779	0.191976	0.270873	0	0	1.56329	1.87474	0	0
ARHGEF7	NM_001354046	6118	4.03741	4.75425	2.48184	3.1899	4.95985	2.64846	1.17726	1.91484	1.55437	1.87202
ARHGEF9	NM_001353923	4662	2.34509	1.63639	0.65138	0.918897	1.77509	3.47563	0.697498	2.50834	1.92967	0.510578
ARID1A	NM_006015	8595	8.06745	25.6108	10.8506	6.65497	16.3914	9.91122	3.17419	2.3601	2.46266	1.65366
ARID2	NM_152641	8598	3.34378	4.4921	1.88376	1.49473	0.641639	1.88456	1.34302	2.38337	0.42898	0.340291
ARID3A	NM_005224	5946	2.01739	3.7331	0.720487	2.03268	3.92676	0	1.84954	5.17417	1.93086	3926.76
ARID3B	NM_001307939	4274	0.284189	0.334584	0.473594	0.779555	1.29084	0	1.1732	0.70499	1.65375	1290.84
ARID4A	NM_002892	5861	1.43816	1.32175	0.70145	0.49474	2.86753	1.40363	0.918417	1.88163	5.78434	2.04149
ARID4B	NM_001206794	5946	3.06451	2.96711	1.87269	1.04065	1.39177	2.72509	0.967903	1.58357	1.33613	0.510538
ARID5A	NM_001319085	2343	1.02082	2.20367	3.82798	2.59998	0	0	2.15661	0.575524	0	0
ARID5B	NM_032199	7492	3.87543	3.30251	3.44184	1.25875	0.694752	1.5303	0.851947	0.959242	0.551501	0.453701
ARIH1	NM_005744	21679	12.724	9.89793	9.63894	10.062	8.93084	5.01438	0.777836	1.02676	0.887491	1.78069
ARIH2	NM_001349214	4981	7.18868	9.30038	5.43855	4.33631	4.51063	2.83868	1.29357	1.70977	1.03996	1.58843
ARL1	NM_001177	3197	2.99853	2.79533	2.81099	2.93734	0	0	0.931925	0.994076	0	0
ARL13B	NM_001174150	3971	1.7265	0.239131	0.507744	0.835686	0	1.016	0.138426	0.470043	0	0
ARL14EP	NM_152316	2373	1.87305	0.80206	0	0.800649	1.16004	1.70341	0.427982	802.06	1.44707	0.68061
ARL14EPL	NM_001195581	642	5.04586	0.742685	0	5.93133	0	0	0.147158	742.685	0	0
ARL15	NM_019087	3328	2.28038	1.53441	1.22154	2.4891	0	6.51789	0.67258	1.2551	0	0
ARL16	NM_001040025	1236	1.63805	1.54311	6.55199	1.92553	2.23181	3.27739	0.941468	0.235482	1.15846	0.680765
ARL17A	NM_001113738	5240	0.0767505	0	0	0	0	0	0	0	0	0
ARL17B	NM_001363805	1591	0	0	0	0	0	0	0	0	0	0
ARL2	NM_001667	932	4.95833	4.86557	4.13175	5.3428	2.81486	8.26705	0.981093	1.17732	0.526752	0.34045
ARL2BP	NM_012106	1969	3.0852	2.49764	3.37423	1.81327	1.31358	0	0.809295	0.739992	0.724029	1313.58
ARL3	NM_004311	3834	2.71764	2.09226	2.09039	1.59728	2.13617	9.41083	0.769598	1.00042	1.33654	0.226967
ARL4A	NM_001037164	2985	5.04424	3.71243	0.630498	1.63057	0	0	0.735827	5.87877	0	0
ARL4C	NM_001282431	3866	1.58259	2.48477	1.31868	2.10837	1.43745	2.11091	1.56908	1.88286	0.681458	0.680641
ARL4D	NM_001661	1578	2.04377	3.00836	0	1.50152	3.48082	0	1.47125	3008.36	2.31665	3480.82
ARL5A	NM_012097	5264	2.29988	1.50459	0.958264	1.35181	7.83437	2.55654	0.653917	1.56848	5.79118	3.06324
ARL5B	NM_178815	7170	6.52031	1.70619	3.62228	3.73405	1.5186	0.557491	0.261633	0.470897	0.406581	2.71911
ARL6	NM_001323513	4001	0.761992	0.112132	0	0	0.648885	0	0.146964	112.132	648.885	648.885
ARL6IP1	NM_015161	2278	19.2184	8.70917	12.1861	4.21514	9.16087	3.36308	0.453145	0.714622	2.17281	2.72314
ARL6IP4	NM_018694	1648	7.37127	6.07609	6.14254	12.4198	5.02166	9.83217	0.824182	0.989022	0.404294	0.510685
ARL6IP5	NM_006407	2134	3.42511	2.68873	0	1.11838	1.29632	7.61439	0.784778	2688.73	1.15807	0.170224
ARL6IP6	NM_152522	3242	3.29561	4.72434	0.716333	3.36865	3.90446	5.7337	1.43309	6.58598	1.15871	0.680848
ARL8A	NM_138795	1789	5.41409	4.51585	5.63941	7.42497	19.9786	27.081	0.833938	0.800624	2.69037	0.737708
ARL8B	NM_018184	2933	2.44177	1.11815	2.03467	3.34865	0	6.10679	0.45774	0.54928	0	0
ARMC1	NM_018120	3000	4.65896	2.35116	0.998298	1.72122	0.906826	2.66328	0.504544	2.35281	0.526543	0.340365
ARMC10	NM_031905	2371	1.84464	1.08615	0	3.07209	0	4.61374	0.588497	1086.15	0	0
ARMC2	NM_032131	3732	0.541918	0.638076	0	0.382113	0	0	1.17527	638.076	0	0
ARMC3	NM_173081	3718	0.216089	0.12718	0	0.126933	0	0	0.585844	127.18	0	0
ARMC5	NM_001288767	3462	0.579233	3.95645	2.89637	2.0429	20.5215	3.47709	6.81874	1.36553	10.0404	5.90024
ARMC6	NM_001199196	2461	3.25507	6.32447	4.47555	2.67837	0	0	1.94236	1.4128	0	0
ARMC7	NM_024585	2151	2.9981	7.50209	1.40521	4.62558	7.65916	5.62357	2.50144	5.33498	1.65547	1.36173
ARMC8	NM_001363941	4757	1.90104	2.04395	2.27291	0.874444	3.3785	2.48061	1.07461	0.89887	3.85918	1.36141
ARMC9	NM_001271466	8122	0.967225	1.67854	1.3999	0.777949	1.38724	0	1.73363	1.19819	1.78091	1387.24
ARMCX3	NM_016607	3395	3.36735	2.26586	4.5097	2.54465	0	2.4062	0.67269	0.502329	0	0
ARMCX5	NM_001168478	2770	0.908539	2.85308	0.378529	0.355982	0	1.51486	3.13684	7.51741	0	0
ARMCX5-GPRASP2	NM_001199818	3940	0.924907	0.847112	0.770673	0.120802	0	0	0.9149	1.09776	0	0
ARMCX6	NM_019007	1840	0.218972	0.257986	1.64322	0.257516	0	2.19196	1.17281	0.156905	0	0
ARMH3	NM_024541	4099	6.31932	12.0922	6.41781	5.91943	4.70859	1.97552	1.91322	1.88387	0.795311	2.38227
ARMH4	NM_001001872	6491	0.627573	0.295605	0.313576	0.295034	1.7102	1.25564	0.47028	0.939695	5.77704	1.36093
ARMT1	NM_024573	2395	2.489	2.38125	1.94445	1.46291	0	0	0.956324	1.22401	0	0
ARNT	NM_001668	4709	3.81149	6.63476	6.21418	2.62976	1.69338	1.6578	1.74027	1.06751	0.643684	1.02084
ARNT2	NM_014862	6523	0.864439	0.945194	1.08044	0.580652	0	1.23535	1.09216	0.874013	0	0
ARNTL	NM_001351807	2809	1.58564	1.18822	1.80174	2.20283	3.92815	0	0.748893	0.659122	1.78242	3928.15
ARNTL2	NM_020183	7429	1.8577	1.28676	1.36587	1.15605	0.7444	1.09318	0.692289	0.941393	0.643361	0.680327
ARPC1A	NM_006409	1582	5.03958	5.04415	2.51968	7.99744	3.43312	2.52076	1.00071	2.0011	0.429224	1.3614
ARPC1B	NM_005720	1511	15.0757	28.3419	13.885	18.9652	27.0272	10.5835	1.87984	2.04103	1.42502	2.55346
ARPC2	NM_152862	1410	14.3593	13.1888	14.3587	9.78998	17.608	60.332	0.918425	0.91846	1.79839	0.291846
ARPC3	NM_001278556	946	2.55202	1.00167	0	1.49999	0	0	0.392347	1001.67	0	0
ARPC4	NM_001198780	2113	23.3134	25.8187	33.9974	21.2062	13.2351	30.5411	1.10741	0.759408	0.624088	0.433341
ARPC4-TTLL3	NM_001198793	3987	5.68751	7.41488	6.0935	9.78969	11.7621	8.12813	1.30349	1.21665	1.20136	1.44691
ARPC5	NM_001270439	7275	7.37652	6.85748	4.36745	5.70462	1.3224	11.6515	0.92951	1.56977	0.231772	0.113486
ARPC5L	NM_030978	2507	3.05424	6.81452	6.02786	4.53507	9.85594	3.2162	2.23043	1.13032	2.17279	3.06351
ARPIN	NM_182616	7587	1.65976	1.48537	1.65971	1.24867	0.452247	7.97017	0.894391	0.894416	0.361892	0.0567353
ARPP19	NM_001306196	5423	8.94147	5.65285	5.31337	4.22149	2.99574	2.19951	0.632136	1.06369	0.709473	1.36139
ARRB1	NM_004041	7352	2.55702	5.76852	6.19053	1.32889	6.2345	10.2321	2.25507	0.931679	4.68797	0.609247
ARRB2	NM_001257328	1841	7.45701	5.77387	6.12881	5.28345	13.9181	4.0876	0.774184	0.941933	2.63378	3.40412
ARRDC1	NM_001317968	1675	8.34129	18.7517	18.9567	15.1534	17.2196	17.7004	2.24779	0.989133	1.13627	0.972783
ARRDC2	NM_015683	2501	3.23556	8.95355	1.21323	2.66238	15.4295	0	2.76638	7.37384	5.7932	15429.5
ARRDC3	NM_020801	4239	2.73469	0.777313	2.82888	0.554228	1.28485	1.88664	0.284138	0.274681	2.3141	0.680667
ARRDC4	NM_183376	4062	1.99127	2.34481	0.746676	11.1187	6.78276	21.9127	1.17695	3.13613	0.60998	0.309521
ARSA	NM_001085427	4096	1.57368	3.24287	3.44218	2.89041	0.669928	0.983881	2.05938	0.941822	0.231696	0.680212
ARSB	NM_000046	4850	0.684054	0.268501	0	0.446711	5.17848	0.760373	0.391942	268.501	11.5666	6.8015
ARSD	NM_001669	5145	0.546836	1.01191	0.58585	1.10203	0	0	1.84711	1.72431	0	0
ARSG	NM_001352901	4530	2.71485	4.15597	0.678492	1.59568	5.54856	0	1.53027	6.11629	3.47507	5548.56
ARSJ	NM_001354210	4507	0.605862	1.22312	0	0.203502	7.0763	2.5978	2.01549	1223.12	34.6026	2.72292
ARSK	NM_198150	3365	0.968413	0.71268	0	0.426857	0.824667	0	0.735167	712.68	1.92744	824.667
ART5	NM_053017	1232	0.324133	0.763534	0.810475	0.381091	0	0	2.34838	0.940921	0	0
ARV1	NM_001346992	1527	0.257559	0	1.28788	0.302771	0	0	0	0	0	0
ARVCF	NM_001670	4056	5.11684	17.249	7.02281	7.66591	18.4543	2.00736	3.37037	2.45579	2.40701	9.18876
ASAH1	NM_004315	2938	3.33894	4.64674	4.55297	1.60568	1.03391	0	1.39126	1.02037	0.643505	1033.91
ASAH2	NM_019893	4797	0	0	0	0	0	0	0	0	0	0
ASAH2B	NM_001321957	5068	0.123818	0	0	0.145546	0	0	0	0	0	0
ASAP1	NM_001362924	6253	3.95591	6.41467	1.62118	3.50668	1.76715	0.648722	1.62113	3.95435	0.503795	2.71986
ASAP2	NM_003887	5665	2.76234	2.75228	1.77059	3.99646	4.82521	1.41712	0.995997	1.55357	1.20707	3.40253
ASAP3	NM_017707	4051	3.33436	3.92636	1.47097	2.3056	7.34905	0	1.17719	2.66742	3.1861	7349.05
ASB1	NM_001040445	6891	4.52531	8.85828	7.1991	5.31951	5.20475	4.1155	1.95707	1.2303	0.978242	1.26436
ASB14	NM_001142733	3187	1.02023	0.600729	0.318768	1.04941	0	1.27585	0.588241	1.87864	0	0
ASB3	NM_016115	2226	3.37142	2.71629	0.887196	3.1288	0	7.10043	0.805441	3.05821	0	0
ASB6	NM_017873	4603	4.20525	5.98354	5.03729	3.50143	4.77468	3.50567	1.42254	1.18761	1.36325	1.3616
ASB7	NM_198243	4924	1.38702	1.44104	1.83565	1.15087	1.11165	0	1.0382	0.784602	0.96509	1111.65
ASB8	NM_001319297	2530	2.48137	1.64355	0.775403	0.182261	2.11299	0	0.662089	2.11688	11.5299	2112.99
ASB9	NM_001031739	1613	0	0.280195	0.595079	0	0	0	280.195	0.470064	0	0
ASCC1	NM_001198799	2760	2.7687	3.58634	6.57552	3.09194	12.2603	0	1.29485	0.545324	3.96397	12260.3
ASCC2	NM_001369920	2805	5.16382	5.74287	3.22725	3.54084	11.7262	1.43491	1.11192	1.77894	3.31075	8.16635
ASCC3	NM_006828	8110	3.82429	4.44478	3.84898	2.10173	5.41361	0	1.16194	1.15449	2.57456	5413.61
ASDURF	NM_001353493	703	2.87997	0.678234	2.87987	3.38544	0	0	0.235419	0.235427	0	0
ASF1A	NM_014034	2433	4.6822	1.33081	0.403565	2.08764	0	1.61516	0.284167	3.2895	0	0
ASF1B	NM_018154	1689	7.01788	8.81477	5.848	2.19976	0	2.34016	1.25587	1.50706	0	0
ASH1L	NM_001366177	12052	4.88362	7.85661	3.43907	2.02137	1.87432	1.37615	1.60844	2.28385	0.926797	1.36102
ASH2L	NM_004674	2918	2.60443	2.42123	3.08407	1.45021	0	4.1139	0.929301	0.78482	0	0
ASIC1	NM_020039	4024	4.81577	10.3865	5.57595	3.93281	2.76269	6.08534	2.15633	1.8624	0.702294	0.453917
ASL	NM_000048	2137	2.55532	4.51349	3.93112	3.69705	5.35646	0	1.76562	1.14785	1.44846	5356.46
ASMTL	NM_004192	2065	9.11236	8.94186	6.64417	6.47155	2.58653	9.4957	0.981182	1.34562	0.399615	0.272361
ASNS	NM_001673	2385	15.5276	13.075	3.46964	20.1901	21.2744	7.81014	0.841994	3.76731	1.05365	2.7236
ASNSD1	NM_001353497	2417	6.71876	1.73665	1.6386	2.50421	1.11638	0	0.258439	1.05919	0.445623	1116.38
ASPH	NM_004318	5301	12.4152	14.5304	9.65164	12.0133	8.25146	15.9035	1.17028	1.50533	0.686802	0.518812
ASPHD1	NM_181718	1816	3.28763	6.12967	9.58864	3.86464	1.86639	5.48154	1.86389	0.639196	0.482815	0.340424
ASPHD2	NM_020437	3370	1.71115	1.58318	2.13885	3.16085	1.66528	6.11358	0.924672	0.739857	0.526678	0.272345
ASPM	NM_018136	10863	2.52895	2.36484	1.95241	1.22408	0	0	0.93474	1.21062	0	0
ASPSCR1	NM_001251888	2046	4.57331	4.48775	4.76352	5.82396	11.6834	9.53141	0.981076	0.94191	2.00575	1.22565
ASRGL1	NM_025080	2193	2.8457	3.94231	2.5108	2.16443	0	1.67455	1.38487	1.56952	0	0
ASS1	NM_054012	1532	1.09554	1.29011	0.547662	3.60602	0	0	1.17653	2.35138	0	0
ASTE1	NM_001288950	2568	1.26142	1.29972	1.18254	0.556053	0	0	1.02955	1.09816	0	0
ASTN2	NM_001365068	6878	0.705087	1.24551	0.881313	1.13962	0.600434	2.64528	1.76397	1.41165	0.526408	0.226897
ASXL1	NM_015338	7052	4.02681	10.0934	5.46474	4.12492	5.87846	1.15098	2.50592	1.84666	1.42476	5.10293
ASXL2	NM_018263	12849	3.39585	4.3321	4.71633	1.92203	1.92788	2.20186	1.27533	0.918337	1.00252	0.87517
ATAD1	NM_032810	4711	2.83646	1.11335	2.57852	1.51546	0	0	0.392375	0.43161	0	0
ATAD2	NM_014109	5546	10.1887	9.94099	9.82434	2.73757	0.991504	0.728047	0.975589	1.01177	0.362052	1.36
ATAD3A	NM_018188	2625	1.68334	3.78422	0.382567	1.25919	0	0	2.24671	9.86586	0	0
ATAD3B	NM_031921	4098	2.13638	2.32215	0.821551	0.96583	1.11953	8.21999	1.08645	2.82311	1.15794	0.136179
ATAD3C	NM_001039211	3863	0.209813	0.370663	0	0.24664	0	1.04971	1.75825	370.663	0	0
ATAD5	NM_024857	6869	1.88747	2.08365	0.737215	1.24802	0	0	1.10336	2.82255	0	0
ATCAY	NM_033064	4971	0	0.0946373	0	0.0943787	0	0.804327	94.6373	94.6373	0	0
ATE1	NM_007041	4895	4.10679	4.06215	1.64264	2.3172	0.559544	0	0.98889	2.47144	0.24137	559.544
ATF1	NM_005171	2412	2.58636	0.761359	1.21231	0.950064	2.20245	1.6171	0.29426	0.627506	2.31578	1.36114
ATF3	NM_001030287	1922	2.94951	3.47321	2.10666	5.69608	0	0	1.17716	1.6479	0	0
ATF4	NM_001675	2027	6.79212	11.9971	5.99279	7.98416	5.44366	17.9861	1.76606	2.00159	0.681722	0.302643
ATF5	NM_001290746	2041	2.84782	3.98229	1.77982	4.81222	13.3381	21.3672	1.39787	2.23622	2.77115	0.624205
ATF6	NM_007348	7470	3.11234	2.78029	3.21952	2.39698	0	1.07359	0.893025	0.863304	0	0
ATF7	NM_001366555	6693	6.05455	7.41479	5.44893	3.70084	5.7745	12.1138	1.22446	1.36053	1.5599	0.476649
ATF7IP	NM_181352	8797	5.07342	4.49382	3.92835	2.74435	1.52925	0.449094	0.885583	1.14365	0.557031	3.39762
ATF7IP2	NM_001352120	3702	1.95616	1.15169	0.814975	1.02196	0	0	0.58845	1.41143	0	0
ATG10	NM_031482	3029	1.00183	1.57303	0	1.374	3.41265	0	1.56859	1573.03	2.48192	3412.65
ATG101	NM_001098673	1262	6.19932	6.96826	3.52214	9.2748	15.3574	2.81895	1.12385	1.97786	1.65565	5.44599
ATG13	NM_001346312	6083	3.72778	7.13315	4.16025	4.92973	2.26741	1.33185	1.913	1.71418	0.459852	1.70118
ATG14	NM_014924	4715	2.64649	0.804235	2.5611	1.10393	0	0.854026	0.303773	0.313897	0	0
ATG16L1	NM_001363742	3348	4.63793	4.90129	3.86478	2.51625	4.05069	0	1.05655	1.26786	1.60917	4050.69
ATG2A	NM_015104	6318	3.2404	8.75395	1.42955	5.07886	12.5527	1.27121	2.70067	6.11928	2.47108	9.86686
ATG2B	NM_018036	13162	1.10309	1.55145	0.536125	0.90043	0.208734	0	1.40519	2.88844	0.231559	208.734
ATG3	NM_022488	1568	3.60625	3.63991	7.08338	4.23916	5.26441	18.0382	1.00905	0.513793	1.24156	0.291832
ATG4A	NM_052936	2205	0.524363	0.411726	0.87416	0.822036	1.19104	0	0.7837	0.470459	1.44713	1191.04
ATG4B	NM_013325	2796	10.4153	12.7618	4.92596	10.9196	9.58836	9.85612	1.22517	2.5902	0.878006	0.972734
ATG4C	NM_032852	2942	1.18874	1.0498	1.48585	0.52401	0	0	0.882379	0.706057	0	0
ATG4D	NM_032885	1963	5.32267	6.0266	3.07058	5.05353	13.9463	6.14383	1.13204	1.96205	2.75916	2.26959
ATG5	NM_001286106	3109	2.73512	2.76062	0.976724	1.83721	0	0	1.00895	2.82351	0	0
ATG7	NM_001349234	5073	3.28687	4.15371	4.20859	3.29829	6.55368	1.60395	1.26334	0.986725	1.98639	4.08342
ATG9A	NM_024085	3718	6.33713	14.6715	6.98128	6.56541	16.8295	6.44694	2.3148	2.10125	2.56296	2.61006
ATIC	NM_004044	1972	8.7437	9.38096	4.85743	4.56806	3.97106	1.94374	1.07276	1.93086	0.869119	2.04194
ATL1	NM_015915	2501	1.37778	0.54081	0.765366	0.179925	3.12881	4.59449	0.392239	0.705682	17.2934	0.680843
ATL2	NM_001330463	4297	6.01384	4.18453	2.50561	2.57063	1.86223	2.73457	0.6957	1.6694	0.724142	0.680745
ATL3	NM_015459	6899	3.90537	1.90516	2.09201	2.16421	3.80069	0.558114	0.487707	0.910252	1.75534	6.7977
ATM	NM_001351834	13003	2.72299	5.62031	1.91214	1.15087	1.66742	0.612105	2.06327	2.93773	1.44758	2.71963
ATMIN	NM_015251	4881	3.1622	5.29153	1.87223	1.8586	9.63744	0.832361	1.67284	2.82482	5.18255	11.5645
ATN1	NM_001940	4702	10.6267	34.2473	18.1765	9.42349	19.051	27.043	3.22246	1.88405	2.02143	0.704442
ATOX1	NM_004045	471	5.79657	2.92532	18.6311	5.84038	0	0	0.504578	0.157004	0	0
ATP10D	NM_020453	6668	0.679984	1.38312	0	0.217881	0	0	2.03106	1383.12	0	0
ATP11A	NM_032189	8768	7.52782	18.6532	11.7762	8.9032	12.2701	3.69603	2.47758	1.58385	1.37802	3.31892
ATP11B	NM_014616	7315	5.03398	6.05805	1.38271	3.31632	1.50739	1.10675	1.20319	4.37812	0.454399	1.36077
ATP11C	NM_173694	6069	2.25036	1.79258	1.48908	0.155546	0.450861	0	0.796221	1.20301	2.88005	450.861
ATP12A	NM_001185085	3734	0	0	0	0	0	0	0	0	0	0
ATP13A1	NM_020410	3846	7.12609	14.0679	3.40573	6.65213	44.9769	9.4352	1.97386	4.12944	6.76026	4.76642
ATP13A2	NM_022089	3996	5.51255	14.2813	6.51472	4.35938	23.2158	11.0295	2.59021	2.19181	5.32426	2.10468
ATP13A3	NM_001367549	7537	12.5989	14.3152	7.8739	6.8203	4.14085	1.10557	1.13614	1.81783	0.607047	3.74207
ATP1A1	NM_000701	3670	22.6104	27.9413	29.4789	16.85	20.6359	50.8658	1.23572	0.947808	1.22461	0.405685
ATP1A3	NM_001256214	3590	3.78647	5.42034	2.08797	8.83656	33.0028	107.511	1.43112	2.59474	3.73438	0.30697
ATP1B1	NM_001677	2216	3.03694	1.95058	2.3006	5.409	55.7985	158.352	0.642072	0.84749	10.314	0.352368
ATP1B3	NM_001679	1846	7.68446	2.76488	3.73522	7.0257	7.27086	10.677	0.359754	0.740019	1.03475	0.68092
ATP23	NM_033276	3134	0	0.361779	0.768019	0.361092	0	0	361.779	0.470442	0	0
ATP2A2	NM_170665	8294	9.66784	16.3454	11.9322	11.2214	15.0969	21.6819	1.69052	1.36975	1.34524	0.696257
ATP2A3	NM_174953	4854	3.23276	9.37063	4.76606	4.18989	21.4587	6.21934	2.89775	1.96571	5.12033	3.44977
ATP2B1	NM_001366524	7054	5.25652	3.78268	1.89807	4.87463	5.9683	23.9558	0.71948	1.99186	1.22411	0.249128
ATP2B4	NM_001684	8697	6.44619	6.04047	4.87981	3.09501	3.09252	1.36237	0.936915	1.2376	0.998873	2.26829
ATP2C1	NM_001199180	3612	5.05875	5.82753	3.57405	2.84406	3.746	4.40068	1.15174	1.63006	1.31667	0.85104
ATP2C2	NM_001286527	3476	3.26177	3.70373	2.62098	4.7928	9.52327	5.8268	1.13515	1.41257	1.98658	1.63411
ATP5F1A	NM_004046	5761	16.9599	15.7536	18.9606	12.3828	4.30574	12.6457	0.928817	0.830813	0.347691	0.340463
ATP5F1B	NM_001686	1759	42.185	47.6052	64.2637	21.1783	52.3876	24.1777	1.12846	0.740767	2.47352	2.16668
ATP5F1C	NM_001001973	1099	8.63761	4.88216	8.63719	3.65522	0	0	0.565156	0.565183	0	0
ATP5F1D	NM_001687	995	21.5476	28.2459	23.3762	53.5258	22.1573	65.0741	1.3108	1.20827	0.413948	0.340488
ATP5F1E	NM_006886	3610	10.1463	10.8615	16.1412	6.50563	6.28377	18.4549	1.07038	0.672865	0.965748	0.340474
ATP5IF1	NM_016311	503	14.9697	17.6276	13.098	11.438	10.1981	0	1.17747	1.34573	0.891517	10198.1
ATP5MC1	NM_005175	645	3.13413	10.3337	1.56696	0.736781	0	0	3.29609	6.59054	0	0
ATP5MC2	NM_001002031	756	3.82667	5.32534	10.4359	3.27136	0	41.7615	1.39128	0.51024	0	0
ATP5MC3	NM_001689	2587	13.0425	7.94998	5.37013	6.85402	14.6343	29.1649	0.609498	1.48013	2.13483	0.501761
ATP5ME	NM_007100	303	23.2975	6.53187	13.8669	7.8246	0	11.0983	0.280357	0.471006	0	0
ATP5MF	NM_004889	443	3.9621	0	1.98091	0	0	0	0	0	0	0
ATP5MF-PTCD1	NM_001198879	5504	1.82793	3.87451	2.92463	2.32064	2.98869	0	2.11845	1.32433	1.28732	2988.69
ATP5MGL	NM_001165877	799	0.506723	0	0	0.595688	0	0	0	0	0	0
ATP5PB	NM_001688	2628	2.69822	2.72336	0.963571	1.5859	2.62597	0	1.00894	2.82339	1.65478	2625.97
ATP5PD	NM_006356	609	1.30196	0.766526	0	1.5305	4.43496	0	0.588296	766.526	2.89583	4434.96
ATP5PF	NM_001003701	1210	3.68114	3.15258	1.6731	2.7537	2.27976	6.69564	0.856182	1.88315	0.82759	0.340433
ATP5PO	NM_001697	756	13.0623	7.69073	3.76776	4.72448	0	10.0517	0.588726	2.04065	0	0
ATP6AP1	NM_001183	2054	5.78469	6.58472	11.087	6.11994	6.56804	13.5029	1.1381	0.593863	1.07304	0.486382
ATP6AP1L	NM_001349374	3823	1.80063	3.11813	1.85342	1.61853	0	2.11915	1.73073	1.68146	0	0
ATP6AP2	NM_005765	2242	6.56322	2.57615	3.48037	3.97442	4.06462	1.98957	0.392452	0.73998	1.02244	2.04194
ATP6V0A1	NM_001130021	4138	6.55322	9.90509	8.06899	4.02412	5.99691	0.978413	1.51126	1.2274	1.48987	6.12296
ATP6V0A2	NM_012463	6506	1.98101	2.66072	1.54758	1.38261	0	0	1.34244	1.71817	0	0
ATP6V0B	NM_004047	987	10.558	10.2386	10.0917	13.506	23.2702	80.7688	0.969657	1.01446	1.72282	0.288105
ATP6V0C	NM_001198569	1021	13.4845	28.9553	30.7355	16.7834	75.6515	7.93508	2.14714	0.942048	4.50725	9.53261
ATP6V0D1	NM_004691	1636	5.57692	7.13813	6.6677	3.70529	33.0369	4.8513	1.27971	1.07039	8.91372	6.8085
ATP6V0E1	NM_003945	1419	14.6914	5.4062	2.2954	3.77763	0	0	0.367959	2.3542	0	0
ATP6V0E2	NM_001289990	2697	1.80164	5.65757	5.25465	1.05882	4.09133	9.01185	3.13848	1.07647	3.86039	0.453944
ATP6V1A	NM_001690	4575	6.25953	5.3984	3.74676	2.17633	1.20118	0.881922	0.862292	1.44043	0.551677	1.36046
ATP6V1B2	NM_001693	2856	4.3233	3.44619	5.98586	3.90923	4.53117	3.99229	0.796937	0.575626	1.1588	1.1347
ATP6V1C1	NM_001695	5635	6.10518	4.5977	2.30706	3.00413	1.45081	0.71012	0.752959	1.99202	0.482777	2.04017
ATP6V1C2	NM_001039362	3259	5.49906	4.26783	7.18594	5.14192	0	0	0.77596	0.593831	0	0
ATP6V1D	NM_015994	1599	2.91474	2.11212	3.36304	2.10845	1.52742	4.48596	0.724385	0.627851	0.724086	0.340414
ATP6V1E1	NM_001696	1333	2.87997	5.76535	7.9197	3.72398	10.4634	0	2.00119	0.727884	2.80897	10463.4
ATP6V1E2	NM_001318063	1599	0.509012	0.899054	0.636151	2.09421	0	0	1.76281	1.41105	0	0
ATP6V1F	NM_001198909	762	5.45191	8.1708	2.47804	4.07828	3.37642	4.95817	1.49843	3.29596	0.827699	0.680843
ATP6V1G1	NM_004888	1563	5.15271	3.1078	2.51334	2.95464	0	5.02898	0.603022	1.23603	0	0
ATP6V1H	NM_015941	2120	2.59332	2.18128	2.31536	1.95969	6.3096	3.70606	0.840791	0.941683	3.21805	1.70205
ATP7A	NM_000052	8492	1.04448	1.22992	1.0681	0.390653	0.646868	1.42474	1.17641	1.15043	1.65164	0.453708
ATP7B	NM_000053	6596	1.64653	4.23683	3.65885	0.645176	4.98537	4.27048	2.57162	1.15765	7.71518	1.16713
ATP8A1	NM_006095	8268	0.538695	0.346006	0.367223	0.287808	0.333609	0.489933	0.641114	0.939664	1.15513	0.679541
ATP8B1	NM_001374385	6161	3.48506	3.56186	3.45211	2.47348	1.34389	1.97344	1.02174	1.03149	0.543099	0.680643
ATP8B3	NM_138813	5095	0.874192	0.842217	0.993337	1.30787	0.541399	0	0.962323	0.847014	0.413638	541.399
ATP9A	NM_006045	7860	3.55944	5.38009	3.05466	3.74697	7.23841	18.6014	1.51107	1.7607	1.93129	0.389112
ATP9B	NR_148360	4827	1.80809	3.83245	1.12994	2.33801	3.07941	1.80877	2.11844	3.38874	1.31655	1.70155
ATPAF1	NM_022745	1829	5.75628	1.56414	4.98111	3.64347	0	0	0.271681	0.313952	0	0
ATPAF2	NM_145691	1553	2.34814	3.99398	0.652187	1.84013	3.55485	0	1.70019	6.1146	1.9308	3554.85
ATR	NM_001184	8158	2.74826	5.20106	2.94448	0.922984	0.668605	0	1.8918	1.76578	0.723611	668.605
ATRIP	NM_130384	4576	1.39465	3.46713	1.16212	2.00378	1.05571	10.8519	2.48424	2.98088	0.526595	0.097274
ATRN	NM_139321	8648	3.22818	3.96661	1.98829	3.13479	3.8247	7.48855	1.22836	1.99398	1.21969	0.510671
ATRX	NM_000489	11167	4.07812	3.56984	3.87944	1.69685	2.21272	1.44412	0.875149	0.919958	1.30325	1.53117
ATXN1	NM_000332	10636	2.40963	2.92741	1.33852	1.79838	3.38725	0.765218	1.21438	2.18541	1.88246	4.42074
ATXN10	NM_013236	3294	7.05282	5.87086	5.16777	4.14529	0.828385	2.43292	0.832296	1.13583	0.199789	0.340351
ATXN1L	NM_001137675	7896	3.59438	5.19997	7.06008	2.65581	2.79841	3.08205	1.44629	0.736428	1.0533	0.907676
ATXN2	NM_001372574	4347	5.8561	8.417	6.67393	6.27644	11.7336	5.16908	1.43706	1.26099	1.86917	2.26952
ATXN2L	NM_148414	4026	11.466	27.2406	11.8176	12.7098	17.8149	7.04319	2.37556	2.30489	1.40156	2.52903
ATXN7	NM_001177387	6849	4.13859	4.52527	2.21695	2.7799	0.402726	0.591409	1.09317	2.04029	0.144818	0.67981
ATXN7L1	NM_020725	5691	1.13837	0.837775	2.66793	0.669118	0.484695	1.42356	0.7353	0.313899	0.723297	0.340241
ATXN7L2	NM_001350174	2590	1.71972	2.02509	0.781633	1.83779	4.26031	0	1.17689	2.58754	2.31691	4260.31
ATXN7L3	NM_020218	3614	5.2661	14.8431	8.26292	4.93908	36.6386	25.7803	2.81808	1.79613	7.4166	1.42113
ATXN7L3B	NM_001136262	7596	12.5373	15.6698	12.9217	8.79079	11.2381	3.30051	1.24976	1.21258	1.27825	3.40392
AUH	NM_001698	1573	2.80491	3.30297	0.63742	3.2972	8.68569	30.6111	1.17715	5.17366	2.63347	0.283734
AUNIP	NM_001287490	1392	2.90897	1.02759	2.18165	0.341895	1.98168	0	0.353129	0.470801	5.77928	1981.68
AUP1	NR_126510	1520	15.4329	23.9423	15.3098	16.7016	18.3572	31.858	1.55128	1.56375	1.09906	0.5762
AURKA	NM_198435	2047	0.746388	1.53813	0.466441	0.658023	0	1.8667	2.058	3.29052	0	0
AURKAIP1	NM_001127229	910	16.4565	12.3318	7.47979	10.5517	10.1918	14.9662	0.74931	1.64846	0.9658	0.680938
AURKB	NM_001284526	1246	6.22968	5.8686	2.72539	1.09838	6.36592	0	0.941888	2.15252	5.79045	6365.92
AVEN	NM_020371	1633	1.32231	0.934316	0	0.621746	0	0	0.706043	934.316	0	0
AVL9	NM_015060	6987	6.47655	7.96394	5.73124	3.36865	1.56182	1.7201	1.22947	1.38932	0.463496	0.907457
AVPI1	NM_021732	1375	1.74533	4.11056	6.54495	3.41946	1.98168	0	2.35382	0.627954	0.579362	1981.68
AXIN1	NM_003502	3707	1.54892	7.42594	3.59551	4.03164	9.0445	6.64075	4.79119	2.06476	2.24282	1.36176
AXIN2	NM_004655	4258	2.29632	7.54895	7.41507	2.69939	0.651783	6.70035	3.28598	1.01792	0.241366	0.0972614
AXL	NM_021913	4717	2.73249	4.42438	3.84252	2.10794	2.32689	2.5627	1.61859	1.15113	1.10335	0.907628
AZI2	NM_022461	4402	2.7391	2.3139	0.595425	2.37998	1.62268	2.3828	0.844458	3.87961	0.68152	0.680713
AZIN1	NM_148174	4196	21.1111	14.5107	16.7162	12.2396	31.2366	7.64491	0.687315	0.868009	2.55188	4.08539
AZIN2	NM_001301825	1864	1.52059	1.02315	4.88766	1.53218	1.47992	2.17321	0.672422	0.209291	0.965262	0.68067
B3GALNT1	NM_001349163	3434	1.06119	0.416531	0.294771	0.693059	0.803309	1.17963	0.392143	1.40829	1.15741	0.680405
B3GALNT2	NM_152490	4719	4.94646	5.42306	2.55822	4.11033	2.32399	5.11904	1.09613	2.11903	0.565265	0.453901
B3GALT6	NM_080605	2804	2.46551	6.83129	5.43843	7.50132	3.95209	2.90174	2.76961	1.25588	0.526783	1.3615
B3GAT3	NM_012200	1452	0.493493	1.45283	1.23365	0.580068	3.36205	9.87412	2.93801	1.17671	5.78599	0.340457
B3GLCT	NM_194318	4213	0.865033	0.905399	1.68187	0.790796	0	0	1.04546	0.53801	0	0
B3GNT2	NM_001319075	2615	4.9552	2.18808	3.09677	1.45619	0	0	0.441483	0.706341	0	0
B3GNT3	NM_014256	2692	2.38189	4.90836	4.09379	3.32493	7.09923	5.95714	2.05983	1.19868	2.13451	1.19152
B3GNT4	NM_030765	2891	4.02291	4.08382	6.58902	2.60903	2.83508	1.38771	1.01489	0.619697	1.08623	2.04153
B3GNT5	NM_032047	4108	5.30341	4.51032	0.982031	2.42443	0	1.96499	0.850295	4.58818	0	0
B3GNT7	NM_145236	3539	0.446764	2.89378	1.1169	1.31305	0.76097	0	6.46273	2.58859	0.579101	760.97
B3GNT9	NM_033309	2702	1.94607	2.64413	4.49067	0.879846	1.01979	0	1.35801	0.588675	1.15774	1019.79
B3GNTL1	NR_135465	3333	3.4804	7.88145	5.35421	2.67501	10.9431	2.67823	2.26387	1.47173	4.08933	4.08442
B4GALNT1	NM_001478	5368	3.18951	5.55196	3.46664	1.79312	7.55772	13.8727	1.74015	1.60108	4.21249	0.544751
B4GALNT3	NM_173593	5484	1.41331	5.40901	2.64994	2.81508	3.20952	0	3.82448	2.04041	1.13971	3209.52
B4GALNT4	NM_178537	3750	5.86178	21.1218	8.4992	9.78451	42.3291	9.38238	3.60269	2.48486	4.32569	4.51107
B4GALT1	NM_001497	4199	7.61839	8.28964	5.30368	8.95539	1.97085	3.85883	1.08797	1.5627	0.220049	0.510605
B4GALT2	NM_030587	2005	6.86666	23.782	5.55357	5.579	11.0068	8.08148	3.46289	4.28151	1.97254	1.36181
B4GALT3	NM_001199873	2415	5.52807	10.3747	2.15927	4.26441	2.35373	3.45625	1.87638	4.80249	0.551817	0.680808
B4GALT4	NM_003778	2234	1.72752	2.23766	1.72744	0.406128	0	1.72813	1.29455	1.29462	0	0
B4GALT5	NM_004776	4721	28.3547	40.8873	35.549	25.124	46.6864	20.1386	1.44194	1.15013	1.85816	2.31813
B4GALT6	NM_004775	4672	2.01875	2.67432	0.841048	0.790942	0	0	1.32408	3.17597	0	0
B4GALT7	NM_007255	1698	3.98602	5.52196	1.17228	1.10247	19.1679	2.34556	1.38498	4.70644	17.3705	8.1685
B4GAT1	NM_006876	2007	1.17365	1.38203	3.9122	0.689848	0	11.7416	1.17655	0.353171	0	0
B9D1	NM_001243473	1281	1.78383	1.2602	0.891811	1.25809	0	0	0.706059	1.41149	0	0
B9D2	NM_030578	1007	0.392742	2.31245	9.81846	1.8467	2.67562	3.92902	5.87301	0.235497	1.44808	0.680815
BABAM1	NM_014173	1377	3.60549	4.89884	4.85339	4.23828	1.88938	5.54909	1.35834	1.00916	0.445685	0.340424
BABAM2	NM_001329114	2136	2.08532	3.79492	1.89565	1.55991	5.16587	1.8964	1.81895	2.00086	3.30952	2.72261
BACE1	NM_012104	5847	3.80894	3.26199	4.67445	2.03509	2.35896	3.464	0.856179	0.697685	1.15857	0.680794
BACE2	NM_012105	8567	1.36031	1.86881	2.04044	0.906123	2.7802	0.907187	1.37281	0.915441	3.06486	3.06127
BACH1	NM_001186	5618	3.17179	3.15394	1.93822	1.57422	0.480158	0	0.99406	1.6264	0.30482	480.158
BAD	NM_032989	929	5.62399	4.28515	0.826973	8.94437	4.50748	6.61902	0.761806	5.17546	0.503889	0.680886
BAG1	NM_004323	3820	2.19549	3.57029	3.13645	1.22897	1.42447	1.0459	1.62545	1.13796	1.15814	1.36065
BAG2	NM_004282	6651	4.73605	3.71796	0.98653	6.49505	2.68866	1.97406	0.784867	3.76491	0.413891	1.3613
BAG3	NM_004281	2559	7.56581	10.9509	2.75827	6.67016	2.14758	1.57681	1.44723	3.96877	0.32192	1.36111
BAG4	NM_004874	4197	1.63279	1.1749	1.13374	1.27955	0.617949	1.81486	0.719123	1.03539	0.482566	0.340307
BAG5	NM_001015049	5050	4.80627	2.35814	2.00248	2.07159	0	1.6027	0.490535	1.17702	0	0
BAHCC1	NM_001291324	10819	4.68687	20.2517	6.39093	3.87026	12.6661	2.71242	4.32003	3.16833	3.27184	4.66795
BAHD1	NM_014952	4779	4.06074	10.9149	4.85501	4.25456	9.62225	0.883098	2.68726	2.24772	2.2611	10.8837
BAIAP2	NM_017451	2892	5.31698	6.26102	3.84759	6.90804	6.67244	2.79943	1.17733	1.62683	0.965756	2.38265
BAIAP2L1	NM_018842	3645	5.95813	10.0043	9.10224	8.17102	21.0464	2.20754	1.67881	1.09898	2.57542	9.52955
BAIAP3	NM_003933	4681	5.10369	12.02	4.75752	7.72818	12.9649	11.25	2.3547	2.526	1.6774	1.15233
BAK1	NM_001188	2170	0	0	0.923192	0.217005	2.51577	0	0	0	11.54	2515.77
BAMBI	NM_012342	1691	4.46264	11.6165	4.11018	7.7308	12.8008	2.34965	2.60246	2.82558	1.65561	5.44567
BANF1	NM_003860	731	0.702966	4.34597	0.878659	1.23955	4.78917	0	6.17355	4.94052	3.86052	4789.17
BANK1	NM_017935	3322	0.470086	0	0	0.276275	0	0	0	0	0	0
BANP	NM_001173543	2438	1.66086	2.93366	1.24554	2.14764	4.52594	1.66154	1.76529	2.35345	2.10642	2.72231
BAP1	NM_004656	3599	4.37639	12.4972	7.38484	5.53031	15.6526	7.66166	2.85494	1.69205	2.82981	2.0427
BARD1	NM_000465	5478	1.61795	1.47214	0.919154	0.432186	0	0	0.909314	1.59988	0	0
BAX	NM_001291428	844	12.7278	8.32645	8.83839	13.8532	3.21135	14.1474	0.654144	0.941971	0.231795	0.226976
BAZ1A	NM_013448	5729	3.50008	3.24958	3.87009	1.58239	0	2.69339	0.928165	0.839447	0	0
BAZ1B	NM_032408	6114	6.22459	11.2287	10.4843	5.99367	2.25557	17.886	1.80363	1.0709	0.376262	0.126101
BAZ2A	NM_013449	8914	11.7845	20.1213	13.8235	6.5533	18.5264	6.34788	1.7073	1.45548	2.8266	2.91805
BAZ2B	NM_013450	8145	1.08655	2.152	1.23469	0.52255	0	0.988242	1.97876	1.74154	0	0
BBC3	NM_001127240	1728	2.8781	17.2065	14.3901	8.06773	33.1814	17.7184	5.97634	1.19563	4.11234	1.8726
BBIP1	NM_001195304	2182	2.22296	1.00674	0.427446	1.20605	0	0	0.45268	2.34976	0	0
BBOF1	NM_025057	3113	0.260697	0.460495	0.977647	0.459704	0	0	1.75965	0.470543	0	0
BBS1	NM_024649	3368	2.04266	2.97128	2.70335	2.11867	0	1.20199	1.4539	1.0987	0	0
BBS10	NM_024685	3568	5.76375	2.26223	3.10761	2.25837	0	0	0.392425	0.72773	0	0
BBS12	NM_152618	3238	0.471867	0.694641	0.884774	0.27737	0	0	1.469	0.78422	0	0
BBS2	NM_001377456	2540	2.87793	2.88054	3.95697	1.3532	3.92122	5.75814	1.00056	0.727784	2.8956	0.680869
BBS4	NM_033028	2467	1.13472	1.14526	0.810475	0.762183	1.10428	0	1.0084	1.41133	1.44694	1104.28
BBS5	NM_152384	3159	0.38477	0.151021	0	0.30153	0.873748	1.28312	0.391479	151.021	2.88814	0.680428
BBS7	NM_176824	3840	1.67715	1.23427	0.786132	1.60181	0	1.0486	0.735498	1.56806	0	0
BBS9	NM_001348041	3712	1.90731	1.26935	1.65845	0.584812	1.6947	2.48871	0.665171	0.764926	2.8929	0.680682
BBX	NM_001142568	9009	5.69819	4.12098	3.70142	2.42611	0.916969	0.897634	0.723082	1.11305	0.377803	1.0204
BCAM	NM_005581	2409	12.3807	28.1859	17.745	22.1213	49.4812	13.2111	2.27641	1.5883	2.23671	3.74514
BCAN	NM_021948	3297	4.4344	10.4435	8.45998	8.36759	22.2594	24.5153	2.35457	1.23431	2.65988	0.907944
BCAP29	NM_001008405	2990	1.75356	1.07364	0.701335	0.906926	0	0	0.611917	1.52868	0	0
BCAP31	NM_001139457	1824	4.66202	6.27398	3.88486	4.95827	3.02473	6.66255	1.34548	1.61457	0.609913	0.453921
BCAR1	NM_001170714	4365	3.06408	12.3553	8.82062	4.47499	19.6092	6.50217	4.03099	1.40057	4.38098	3.01533
BCAR3	NM_001261408	3336	1.13099	2.6638	2.19919	1.77276	3.42468	0	2.35321	1.21072	1.93075	3424.68
BCAS1	NM_001366298	3441	0	0.274212	0	0.684446	0	1.16503	274.212	274.212	0	0
BCAS2	NM_005872	1272	2.48994	0.366493	1.55611	0.731672	0	3.11362	0.14713	0.235367	0	0
BCAS3	NM_001353144	3652	2.81873	5.36187	2.98128	2.03903	9.60146	1.08453	1.90155	1.79791	4.70653	8.84499
BCAS4	NM_017843	1378	3.5262	4.49835	0	3.79967	2.00178	0	1.27533	4498.35	0.526692	2001.78
BCAT2	NM_001190	1563	5.06477	4.17483	3.79845	4.16755	18.9771	0	0.824125	1.0988	4.55243	18977.1
BCCIP	NM_016567	1433	11.7778	5.6136	4.20616	8.57058	0	0	0.476587	1.3343	0	0
BCDIN3D	NM_181708	3226	1.12166	0.733801	0.311499	1.31853	0	0	0.653628	2.34817	0	0
BCKDHA	NM_000709	1742	1.82607	1.07509	2.8531	1.0732	0	2.2834	0.588426	0.376684	0	0
BCKDHB	NR_134945	3762	1.846	1.15079	2.44308	1.27641	0	0	0.623058	0.470846	0	0
BCKDK	NM_005881	2036	3.80572	9.41106	6.65974	6.26308	24.6301	1.90353	2.47222	1.41291	3.93197	12.9324
BCL10	NM_003921	2833	3.26033	2.76415	1.30403	2.14618	0	1.30457	0.847555	2.11808	0	0
BCL11A	NM_001365609	5844	0.476701	0.561297	0.170171	0.400215	0.463903	3.40635	1.175	3.27916	1.15624	0.136148
BCL11B	NM_138576	8527	0.251708	1.09676	0.125753	0.207078	1.02893	1.00728	4.34003	8.65269	4.94491	1.02048
BCL2	NM_000633	6492	0.311836	1.02823	1.0914	0.439923	9.77315	9.35961	3.2868	0.941255	22.1652	1.04407
BCL2L1	NM_001317920	2405	16.8238	37.5724	13.415	24.0385	34.581	37.7229	2.23316	2.80057	1.43851	0.916687
BCL2L11	NM_138621	5098	1.68249	5.28337	1.40198	5.93345	11.4622	5.61049	3.13835	3.76583	1.93146	2.04263
BCL2L13	NM_001270726	4961	3.34649	5.38236	1.02022	2.68647	6.11655	0	1.60788	5.27053	2.27595	6116.55
BCL2L2	NM_004050	3526	5.68725	7.23277	12.5114	4.0112	6.19902	21.6198	1.27153	0.578047	1.54504	0.286716
BCL2L2-PABPN1	NM_001199864	2059	6.84385	9.62608	12.8317	6.59242	1.29506	7.60726	1.40632	0.750121	0.196417	0.170218
BCL3	NM_005178	1877	3.04127	6.39518	3.80145	5.61798	10.3595	8.69282	2.10211	1.68186	1.84366	1.19159
BCL6	NM_001130845	3659	1.70276	1.73774	1.70275	0.800649	1.5467	1.13561	1.01994	1.01995	1.9294	1.3608
BCL7A	NM_020993	3785	2.24781	6.55426	2.40824	2.01312	20.0531	5.35403	2.91454	2.72047	9.95626	3.74472
BCL7B	NM_001301061	1785	4.4182	4.16214	8.83608	2.85647	1.50493	2.20996	0.941831	0.470985	0.526665	0.680667
BCL7C	NM_001286526	2184	2.63988	1.67392	1.01526	2.1483	15.2178	12.1892	0.63385	1.64714	7.08036	1.24837
BCL9	NM_004326	6187	4.18532	8.39371	3.92351	2.15239	5.34607	2.61683	2.00503	2.13879	2.48263	2.04217
BCL9L	NM_182557	9643	8.76405	32.6552	18.7048	12.9777	38.4968	29.3123	3.72561	1.74572	2.96615	1.31329
BCLAF1	NM_014739	7494	1.89552	1.11607	1.95126	1.04853	0	0.557699	0.58848	0.571681	0	0
BCLAF3	NM_001367774	6579	0.810841	0.514069	0.467711	0.733205	0.424903	0.623942	0.633214	1.09677	0.578726	0.679908
BCOR	NM_001123385	6908	3.97177	8.46305	3.70361	3.18661	4.72428	2.52269	2.13026	2.28446	1.48207	1.87197
BCORL1	NM_001184772	7349	3.47124	9.27826	6.474	4.01573	6.00579	4.40961	2.67212	1.43294	1.49519	1.36167
BCR	NM_004327	6783	2.39673	8.15702	2.19203	4.67266	11.9471	2.92396	3.40197	3.71952	2.55626	4.08453
BCS1L	NM_001320717	1599	2.41183	4.41795	2.00975	2.20509	0	5.36179	1.83102	2.19717	0	0
BDH1	NM_203314	3527	1.07374	1.40478	0.894695	0.98167	5.68944	2.38702	1.30709	1.56837	5.78978	2.38249
BDH2	NM_020139	2920	0	0	0	0.162991	0.944691	0	0	0	5.76062	944.691
BDNF	NM_001143810	4057	1.99619	0.940118	2.49511	0.469266	0	0.998418	0.47072	0.376633	0	0
BECN1	NM_003766	2167	9.34312	4.18072	10.2771	5.93067	10.1839	13.0854	0.447417	0.406762	1.71686	0.778203
BEGAIN	NM_001159531	2750	1.17797	2.08066	1.47235	1.5578	1.00303	5.89214	1.76481	1.41219	0.643467	0.170203
BEND3	NM_001367314	6443	0.607982	2.00451	0.455943	0.285837	0.828385	0.608229	3.29158	4.3868	2.888	1.35973
BEND7	NM_001369863	2378	1.01565	0.597919	0	0.397952	0	0	0.588126	597.919	0	0
BET1	NR_133908	3584	0.803887	0.631096	0	0.629994	0	0	0.784081	631.096	0	0
BET1L	NM_001098787	2815	5.75391	17.1082	12.9458	5.91819	13.7194	18.7073	2.9728	1.32142	2.31778	0.733331
BEX2	NM_001168399	1085	4.85165	2.19732	7.46387	3.94836	2.54243	3.73348	0.45281	0.294355	0.643757	0.680799
BEX3	NM_001282674	993	12.0297	10.0839	6.11646	3.83478	22.2242	24.4765	0.838183	1.64839	5.79391	0.907943
BFAR	NM_016561	2903	4.39131	5.48425	3.65919	2.03348	2.71953	3.9936	1.2486	1.49835	1.33672	0.680802
BFSP1	NM_001195	2217	0.917359	0.864154	0	2.1567	0	0	0.940977	864.154	0	0
BHLHA15	NM_177455	706	2.2942	2.70151	1.4337	0	0	0	1.17703	1.88297	0	0
BHLHB9	NM_001142526	5087	0.693807	0.116665	0.495515	0	0	0	0.16791	0.234968	0	0
BHLHE40	NM_003670	3152	5.20512	4.71482	4.33734	2.66706	1.81844	4.00544	0.90563	1.08678	0.68156	0.453879
BICD1	NM_001354186	9428	2.13841	2.0648	1.71048	1.50809	1.1654	0.427844	0.965123	1.20644	0.772252	2.71753
BICD2	NM_015250	4657	3.34496	4.57051	4.891	2.44823	1.28983	6.31369	1.36598	0.934282	0.526628	0.204259
BICDL2	NM_001103175	1996	4.91907	7.37228	9.50235	11.0391	27.4182	8.9472	1.49841	0.775756	2.48351	3.0641
BICRA	NM_015711	5739	2.25782	6.14834	2.29298	3.7323	7.21006	1.41166	2.72192	2.6802	1.93128	5.1039
BICRAL	NM_001318819	6749	2.62631	3.86571	1.64137	1.47342	2.43973	0.597085	1.47136	2.35374	1.65471	4.07923
BID	NM_197966	2519	3.05424	3.40721	3.21479	1.13371	0	0	1.1152	1.05953	0	0
BIK	NM_001197	951	2.54939	1.50096	3.18664	7.99146	0	0	0.588523	0.470869	0	0
BIN1	NM_139343	2487	5.00659	3.75168	4.55124	6.06359	3.10065	3.03547	0.749198	0.82414	0.51127	1.02114
BIN3	NM_018688	1823	1.31324	3.86617	3.28309	2.3156	0	2.18961	2.94175	1.17724	0	0
BIRC2	NM_001256163	4073	5.44029	4.39646	4.26673	3.57369	0.726695	0	0.807981	1.03016	0.203289	726.695
BIRC3	NM_001165	6877	0.234322	0.275935	0.146405	0.172188	0.399071	0	1.17258	1.87195	2.30426	399.071
BIRC5	NM_001012271	2643	15.1474	13.2452	12.3724	1.7629	1.02168	0	0.874365	1.07046	0.579217	1021.68
BIRC6	NM_016252	15702	5.54452	14.2423	5.09301	3.18289	8.60845	3.61172	2.56825	2.79588	2.70375	2.38282
BIVM	NM_017693	3789	1.36234	1.234	2.35782	0.123138	0	0	0.905129	0.523143	0	0
BIVM-ERCC5	NM_001204425	5137	1.6534	2.31771	2.55868	1.01802	1.07272	0.787645	1.40093	0.905468	1.05269	1.3602
BLCAP	NM_006698	2018	6.19101	4.78417	12.575	4.32098	5.27197	13.548	0.772636	0.38042	1.2198	0.389105
BLM	NM_001287246	5350	2.57805	2.30284	1.33333	0.835978	0	0	0.892902	1.72584	0	0
BLMH	NM_000386	2307	4.62869	3.38301	5.98506	4.69054	6.524	4.79011	0.730721	0.565148	1.39059	1.36169
BLVRA	NM_000712	1074	4.86963	0.882193	0	1.76122	0	0	0.181125	882.193	0	0
BLVRB	NM_000713	799	12.2993	8.91267	0	7.22891	0	0	0.724588	8912.67	0	0
BLZF1	NM_001320973	2524	1.69207	0.996229	1.26896	0.59671	0	0	0.588415	0.78446	0	0
BMI1	NM_005180	3540	6.0208	4.86557	2.65605	3.19179	4.82546	3.54298	0.807993	1.83119	1.51136	1.36159
BMP1	NM_006129	3593	2.75242	7.04331	1.8525	3.48442	2.88473	4.23614	2.55803	3.80001	0.827656	0.680819
BMP2K	NM_198892	3806	1.17025	3.00673	0.531856	3.0015	1.44955	3.19294	2.5671	5.64266	0.482779	0.453843
BMP4	NM_001347912	1735	36.8757	146.484	55.428	19.4788	60.4185	30.3523	3.97227	2.64273	3.1016	1.99051
BMP6	NM_001718	3784	1.33758	1.38611	0.534971	1.76108	0.728963	0	1.03551	2.58616	0.413695	728.963
BMP7	NM_001719	4021	1.10495	1.30117	1.25557	1.77122	0.684293	19.0936	1.17652	1.03549	0.386121	0.0358369
BMP8A	NM_181809	5636	1.15151	2.03407	2.69885	1.6921	4.41291	1.44004	1.7649	0.753399	2.6064	3.06232
BMP8B	NM_001720	4826	2.35128	3.75766	1.8893	1.77684	8.58123	2.5202	1.59746	1.98786	4.82676	3.40363
BMPR1A	NM_004329	6417	0.447866	0.922985	0.279888	0.263136	0	0	2.05626	3.28595	0	0
BMPR2	NM_001204	12068	3.28772	3.31838	1.42574	2.09013	2.97111	3.35602	1.00902	2.32584	1.42082	0.885043
BMS1	NM_014753	7759	1.91189	1.59968	2.51553	1.59685	1.37104	0	0.836261	0.635668	0.858057	1371.04
BMT2	NM_152556	3940	1.12989	0.483702	0.256699	0.362186	0	1.02756	0.427719	1.87701	0	0
BNIP1	NM_013979	1297	0.584236	0.688024	0.730293	2.40399	0	0	1.17563	0.940832	0	0
BNIP2	NM_001320675	6120	4.26512	1.94895	2.38701	2.84355	0	0	0.456843	0.816139	0	0
BNIP3	NM_004052	1633	0.743843	0.29198	0	0	0	0	0.392001	291.98	0	0
BNIP3L	NM_004331	3452	6.5946	3.13336	4.04915	3.80792	3.15263	4.62952	0.475069	0.773642	0.827695	0.680836
BOD1	NM_138369	1921	3.76874	3.6982	4.71068	8.3681	1.42624	18.8509	0.98102	0.7849	0.170417	0.0756546
BOD1L1	NM_148894	10565	2.15088	2.23893	1.1522	1.94151	2.35505	0	1.04045	1.94149	1.21237	2355.05
BOK	NM_032515	2626	4.74225	12.2495	3.44184	8.27189	13.5479	10.7125	2.5825	3.55795	1.63763	1.26457
BOLA1	NM_001321026	1116	1.10232	3.02885	0.918577	0.431894	0	3.67588	2.7452	3.29374	0	0
BOLA2	NM_001031827	1017	0	0	0	0	0	0	0	0	0	0
BOLA2-SMG1P6	NM_001320622	1945	0	0	0	0	0	0	0	0	0	0
BOLA2B	NM_001039182	375	0	0	0	0	0	0	0	0	0	0
BOLA3	NM_212552	555	4.38555	0	1.82723	0	0	7.31197	0	0	0	0
BOP1	NM_015201	2428	22.1904	33.596	31.6992	25.3002	65.9241	26.7052	1.51392	1.0598	2.60557	2.46849
BORA	NM_024808	2760	3.73694	2.04304	1.66814	1.2551	0	0	0.546568	1.22401	0	0
BORCS5	NM_058169	6421	1.89544	1.78551	1.42148	1.33685	0.430385	0	0.941505	1.25521	0.321699	430.385
BORCS6	NM_017622	1836	0.846206	2.24211	0.528857	1.4921	0	2.11638	2.64647	4.23153	0	0
BORCS7	NM_001136200	2386	2.16182	1.1749	0.415679	1.17284	1.13289	1.66348	0.543225	2.81967	0.965115	0.680626
BORCS8	NM_001145784	992	1.4128	0.998224	0.706411	1.66079	3.84996	0	0.706056	1.41109	2.31676	3849.96
BPGM	NM_001293085	1909	2.04275	2.67278	0.56739	0	1.54626	2.2706	1.30778	4.70236	1546.26	0.680693
BPNT1	NM_006085	2400	2.79261	0.967131	0.82132	2.3172	0	0	0.346194	1.1761	0	0
BPTF	NM_182641	11075	5.71371	8.67236	3.29266	3.05289	1.51652	1.11346	1.51755	2.63304	0.496587	1.36077
BRAF	NM_001374258	9807	3.50805	2.55711	2.64463	1.71816	2.27604	1.25335	0.728719	0.966541	1.32393	1.81452
BRAP	NM_006768	3996	1.80588	1.8903	2.25733	1.17933	0.683474	8.02943	1.04616	0.837033	0.579052	0.0851106
BRAT1	NM_001350626	2959	7.10183	18.0695	2.21914	6.55928	18.1429	3.80595	2.54398	8.13887	2.76556	4.76573
BRCA1	NM_007300	7151	1.83803	2.03316	1.25315	1.04758	0.379414	0	1.10556	1.62115	0.361835	379.414
BRCA2	NM_000059	11386	1.2091	0.963143	0.533356	0.167152	0	0	0.795923	1.80244	0	0
BRCC3	NM_024332	2929	0.414707	0.325429	0.345534	0.32496	0	1.383	0.782833	0.939098	0	0
BRD1	NM_001349941	4524	4.20686	9.80212	3.80387	3.89296	6.70735	4.47703	2.32948	2.5762	1.7225	1.49783
BRD2	NM_001199455	4602	15.6183	50.7705	21.4468	16.4975	49.7527	13.2036	3.25051	2.36716	3.01559	3.76784
BRD3	NM_007371	5642	5.17383	14.4698	5.02991	4.39251	6.36403	0.718841	2.79619	2.87618	1.44851	8.84089
BRD3OS	NM_001355256	5682	3.54426	6.88631	4.87312	1.66648	7.24352	1.77277	1.9424	1.41283	4.34399	4.08368
BRD4	NM_058243	5198	5.60889	12.5062	7.01081	7.44789	18.0438	10.9103	2.22931	1.78359	2.42234	1.65367
BRD7	NM_001173984	5427	1.05085	1.44367	0.656687	1.02933	2.3863	0	1.37251	2.19507	2.31605	2386.3
BRD8	NM_139199	4028	2.98691	2.57932	4.97799	0.702183	1.35655	0.995995	0.863252	0.51804	1.92916	1.36064
BRF1	NM_001519	3671	1.99025	8.07299	6.35782	4.8093	12.8061	0	4.05423	1.26957	2.66222	12806.1
BRF2	NM_018310	2560	1.21469	1.66884	2.02452	1.42794	0	2.02542	1.37275	0.82391	0	0
BRI3	NM_015379	790	3.58336	6.63095	12.7974	3.61055	3.48743	5.12118	1.84997	0.518107	0.965633	0.680849
BRI3BP	NM_080626	6702	8.27692	26.6154	2.38747	5.23893	6.50605	3.18457	3.21522	11.1433	1.24163	2.04235
BRIP1	NM_032043	8182	2.33058	1.7517	1.36356	0.466273	0.337768	0	0.75129	1.28371	0.722849	337.768
BRIX1	NM_018321	1591	5.40747	2.24736	3.18075	1.49561	0	3.18208	0.415526	0.706328	0	0
BRK1	NM_018462	1150	17.2165	11.7585	6.02544	5.66659	2.34573	13.7784	0.682938	1.95115	0.413884	0.170234
BRMS1	NM_001024957	1342	2.09185	4.57468	0	2.81027	2.03581	0	2.18586	4574.68	0.72416	2035.81
BRMS1L	NM_032352	2637	1.41034	0.922623	1.56696	1.65787	0	1.56761	0.65372	0.588423	0	0
BROX	NM_001375661	3767	3.82938	2.77494	0.9818	1.7313	0	0.98222	0.724455	2.8235	0	0
BRPF1	NM_001003694	4743	1.88416	3.42897	1.49866	2.11414	2.33382	6.85422	1.81893	2.2865	1.10339	0.340444
BRPF3	NM_015695	6052	3.29425	5.06672	3.5294	2.05473	2.29003	0	1.53758	1.43517	1.11398	2290.03
BRSK1	NM_032430	3250	3.28568	8.512	3.61409	12.0505	34.9187	40.7585	2.58985	2.35458	2.89745	0.856702
BRSK2	NM_001256630	4520	2.32923	6.54049	4.927	3.89639	11.5957	20.6128	2.8068	1.32721	2.97525	0.562521
BRWD1	NM_018963	9954	3.95456	6.22702	1.37937	2.64859	2.81933	0.459961	1.57425	4.51114	1.06406	6.1162
BRWD3	NM_153252	12921	3.22852	3.20543	2.37386	1.59991	0.86247	0.316609	0.99254	1.34974	0.538737	2.71551
BSDC1	NM_001300958	5152	5.79368	12.4462	8.02469	4.87776	9.06725	11.7484	2.14786	1.55079	1.85851	0.771718
BSG	NM_001728	1946	56.2406	81.2983	54.7839	61.0954	55.4887	13.5805	1.44552	1.48396	0.908215	4.08562
BSPRY	NM_001317943	2343	3.9984	4.84291	2.99859	6.04308	2.33476	6.85713	1.21091	1.61453	0.386289	0.340437
BST2	NM_004335	1001	0	0.935857	0.993337	0.934225	0	0	935.857	0.941187	0	0
BTAF1	NR_165093	8848	5.86857	9.82378	2.58879	2.97581	7.05519	0	1.67368	3.79327	2.37005	7055.19
BTBD1	NM_025238	3188	9.60017	7.82625	2.15373	6.07651	6.70779	8.00319	0.815135	3.63212	1.10371	0.838034
BTBD10	NM_001297742	2558	0.47475	1.67764	0	0.930356	0	0	3.52629	1677.64	0	0
BTBD11	NM_001018072	5746	1.75737	2.56627	0.351417	1.15692	2.87351	0	1.45945	7.28189	2.48161	2873.51
BTBD2	NM_017797	2629	13.3018	28.9594	15.8532	12.7272	23.1814	20.8887	2.17693	1.8266	1.82126	1.1097
BTBD3	NM_181443	4672	2.94679	2.75563	2.59998	0.815029	1.77131	4.3352	0.934811	1.05946	2.17065	0.408494
BTBD6	NM_033271	1996	2.44533	4.55945	4.58504	1.43729	9.71815	2.03864	1.86379	0.994202	6.75676	4.76463
BTBD7	NM_001002860	8445	3.1438	5.77731	2.85783	1.11984	3.24499	0.476505	1.8371	2.02086	2.89513	6.79572
BTBD9	NM_052893	8730	1.71938	3.78304	2.82784	2.12757	3.0825	2.71595	2.19896	1.33731	1.44815	1.13454
BTC	NM_001729	2652	0.575332	0.169332	0	0.845321	0	0	0.29381	169.332	0	0
BTD	NM_001370752	1927	0.696097	0.585409	0.745753	0.701307	0	0.994749	0.839782	0.78394	0	0
BTF3	NM_001037637	1249	11.023	12.5983	12.1571	5.71652	3.31291	6.48653	1.14281	1.0362	0.579432	0.510658
BTF3L4	NM_152265	4533	2.12213	1.4376	0.654033	1.43524	1.18827	0	0.677113	2.19469	0.827345	1188.27
BTG1	NM_001731	4629	2.24959	2.54714	1.2978	5.79739	6.48381	4.32779	1.13176	1.96115	1.11821	1.49783
BTG2	NM_006763	2728	5.22777	4.7489	3.73395	4.38945	1.01752	2.9884	0.908227	1.27148	0.231759	0.340378
BTG3	NM_001130914	1542	7.62102	2.39304	1.27011	4.47916	3.46116	2.54131	0.313963	1.88263	0.772553	1.36142
BTN2A1	NM_007049	2890	0.821612	0.80623	0	0.80481	0	0	0.980085	806.23	0	0
BTN2A2	NM_006995	3581	1.00946	1.45292	0.280349	1.58225	0	0	1.43788	5.1641	0	0
BTN3A1	NM_007048	3388	0.707461	0.694188	0.589541	0.554447	0	5.11135	0.979853	1.17551	0	0
BTN3A2	NM_001197247	4068	0.285546	1.5132	0	0.503499	0.972665	0.475605	5.28083	1513.2	1.92798	2.04082
BTN3A3	NM_006994	2970	0.269772	0	0.337112	0.158539	0	0.449302	0	0	0	0
BTNL9	NM_152547	3456	0.231354	1.29419	0.867583	2.17597	1.57631	0	5.56992	1.49	0.724087	1576.31
BTRC	NM_033637	6024	3.61312	4.02254	4.10556	2.62552	2.68513	0.657167	1.113	0.979539	1.02231	4.07971
BUB1	NM_004336	3762	4.67737	2.62274	2.784	0.654519	0	0	0.56061	0.941739	0	0
BUB1B	NM_001211	3668	4.00383	3.44048	2.43466	0.890357	0	0	0.859083	1.41255	0	0
BUB1B-PAK6	NM_001128628	3879	1.70674	3.76836	1.86657	2.38246	2.18009	5.33569	2.20663	2.01778	0.914673	0.408509
BUB3	NM_004725	7703	15.0165	9.14319	19.4108	5.51075	2.99411	1.46558	0.608837	0.471012	0.543222	2.04156
BUD13	NM_032725	2190	1.83557	1.94532	0.917654	0.862985	0	0	1.05922	2.11758	0	0
BUD23	NM_001202560	1252	7.84746	5.9141	3.92351	5.53484	0	0	0.753537	1.50697	0	0
BUD31	NM_001370407	811	7.37652	7.77186	0.970494	8.21467	5.28968	7.76771	1.05345	7.99991	0.643853	0.680896
BVES	NM_007073	5435	0.363738	0.599732	0.181823	0.342114	0	0	1.64428	3.28039	0	0
BYSL	NM_004053	1718	2.84876	3.35455	7.12145	3.58785	1.38616	0	1.17713	0.470982	0.386242	1386.16
BZW1	NM_001207068	6536	1.82632	1.22892	0.326036	1.22678	1.77742	1.30499	0.672528	3.75777	1.44768	1.36098
BZW2	NM_001362717	1732	10.5935	8.14651	9.72836	3.04961	0	2.16275	0.768937	0.837312	0	0
C10orf88	NM_024942	2913	1.70522	0.772236	0	1.23349	0	0	0.452601	772.236	0	0
C11orf1	NM_022761	2568	2.05963	2.42531	1.02979	3.38953	0	0	1.17698	2.35285	0	0
C11orf24	NM_022338	2071	4.79864	4.78127	0.92273	3.47121	17.6026	0	0.996171	5.17604	5.06957	17602.6
C11orf45	NM_001256088	3635	0.6704	0.394684	0.837818	0.131313	5.32836	0	0.587853	0.470525	40.271	5328.36
C11orf49	NM_001003677	1668	4.46535	7.88734	8.1186	2.14735	1.3827	2.03041	1.76595	0.971396	0.643609	0.680661
C11orf52	NM_080659	1104	0.355172	0	0.887773	0.834956	0	0	0	0	0	0
C11orf54	NM_001351989	4267	2.63309	1.03358	0	1.20371	0.996544	0	0.392384	1033.58	0.827206	996.544
C11orf58	NM_014267	3920	2.44177	1.07818	0.508667	1.31554	0	3.0534	0.441375	2.11545	0	0
C11orf68	NM_001135635	1560	6.75752	8.56939	1.94918	7.94343	14.1647	0	1.26794	4.39415	1.78297	14164.7
C11orf71	NM_019021	744	1.03821	1.22258	6.48899	1.2205	0	0	1.17645	0.188379	0	0
C11orf80	NM_024650	2323	6.2753	4.9263	3.05027	3.89318	4.74998	3.48761	0.784905	1.61451	1.21977	1.36157
C11orf95	NM_001144936	5716	2.24875	5.21076	7.43526	2.81399	4.44769	6.53131	2.31615	0.700723	1.58	0.680874
C11orf98	NM_001286086	646	4.96843	5.85065	3.10519	8.76065	0	6.21298	1.17733	1.88355	0	0
C12orf29	NM_001009894	2829	1.12709	0.995414	0.35211	0.662476	0	0	0.882391	2.81899	0	0
C12orf4	NM_001304811	3853	0.838997	0.98798	0.786478	0.369778	0	0	1.17617	1.25461	0	0
C12orf43	NM_001286191	4562	1.53323	1.44431	3.06631	1.6221	1.04449	3.06766	0.941389	0.470871	0.643515	0.340374
C12orf45	NM_152318	23524	1.95302	0.766526	1.62741	1.5305	0	0	0.392281	0.47072	0	0
C12orf57	NM_001301834	638	8.88558	7.47371	9.51988	11.1911	8.64757	38.0959	0.841011	0.784981	0.772647	0.226989
C12orf60	NM_175874	1586	0.359582	0	0.898964	0	0	0	0	0	0	0
C12orf65	NM_001194995	1901	1.91452	3.09991	0	1.12517	0	0	1.61831	3099.91	0	0
C12orf66	NM_001300940	2733	2.51869	0.348907	2.59271	0.870795	0	0	0.138472	0.13452	0	0
C12orf73	NM_001135570	1702	0.956625	0.281555	0	0.281092	0	0	0.294014	281.555	0	0
C12orf75	NM_001145199	1311	5.33573	5.58505	5.18739	12.893	2.01942	0	1.04653	1.07645	0.156617	2019.42
C14orf119	NM_017924	2914	2.1999	1.61908	0.687375	0.969772	0	1.37545	0.735644	2.35203	0	0
C14orf132	NM_001289139	7720	2.03554	3.196	2.34859	1.53385	3.91133	1.04424	1.56933	1.36024	2.54834	3.74203
C14orf28	NM_001017923	2935	0.278676	0	0.348302	0.491382	0	1.39387	0	0	0	0
C14orf93	NM_001282970	2233	0.671757	1.97768	1.67944	0.592257	1.14416	0	2.93967	1.17688	1.92861	1144.16
C15orf39	NM_015492	4425	2.83553	10.9863	3.88717	5.48353	11.2163	1.83002	3.87314	2.82556	2.04508	6.12571
C15orf40	NM_001160115	608	1.46708	2.59128	0	0.862255	0	0	1.76509	2591.28	0	0
C15orf61	NM_001143936	4192	1.56096	2.57334	0.780479	1.10094	2.12685	3.12324	1.6475	3.2929	1.9301	0.680757
C16orf46	NM_001100873	1911	1.69513	1.74662	3.708	1.99254	1.4435	0	1.02977	0.470914	0.72409	1443.5
C16orf70	NM_001320542	2788	2.44974	3.90279	3.60243	1.69393	0.981675	0	1.5925	1.08308	0.579185	981.675
C16orf72	NM_014117	5952	8.80281	11.7439	5.34256	9.68976	11.7858	13.2348	1.33396	2.19777	1.21619	0.890453
C16orf74	NM_206967	910	4.51428	8.5053	16.9279	7.42913	21.5274	18.0641	1.88367	0.502412	2.89731	1.19166
C16orf87	NR_145837	7162	0.744776	0.539632	0.429638	0.471382	1.17081	0	0.723584	1.2531	2.47853	1170.81
C16orf91	NM_001272051	917	1.65611	2.92532	4.14017	0.973276	11.2825	4.14194	1.76531	0.7064	11.5804	2.72331
C16orf95	NM_001195124	1112	0.700507	2.4748	3.50264	0.823496	0	0	3.52783	0.706352	0	0
C17orf49	NM_001142798	854	4.48426	3.69629	5.60503	4.21697	6.10981	8.97198	0.824097	0.659342	1.44852	0.680912
C17orf58	NM_181655	1380	2.27648	1.67537	1.42274	1.00349	0	0	0.735625	1.17673	0	0
C17orf67	NM_001085430	2037	0	0.23333	0	0.465908	0	0	233.33	233.33	0	0
C17orf75	NM_022344	4547	0.971805	1.56061	0.441752	0.415398	0	0	1.60424	3.52479	0	0
C17orf80	NM_017941	3654	3.88764	2.89115	3.45268	3.48756	0.696957	1.02341	0.743485	0.837121	0.199784	0.680353
C17orf97	NM_001013672	1841	0.880722	0.51842	1.65129	0.517659	0	0	0.587963	0.313758	0	0
C18orf21	NM_031446	985	2.31829	3.63991	0.965879	0.454156	0	0	1.56941	3.7646	0	0
C18orf25	NM_145055	5456	5.62814	4.62163	3.5174	3.83018	1.00896	0	0.821019	1.31356	0.263354	1008.96
C18orf32	NM_001199346	5384	3.80725	2.56182	2.71927	5.11477	0	0	0.672704	0.941752	0	0
C18orf54	NM_001288980	5703	1.3514	1.08878	1.24461	0.668826	0	0	0.805073	0.874093	0	0
C19orf12	NM_001031726	4412	1.28483	2.91798	4.1299	1.1867	11.8796	0.918123	2.26934	0.706378	10.0022	12.925
C19orf25	NM_152482	2243	3.94701	13.3098	15.6978	6.32688	2.44445	5.38435	3.37126	0.847819	0.386299	0.453908
C19orf33	NM_033520	374	14.8358	7.19352	4.3633	16.4136	0	8.73027	0.484842	1.64826	0	0
C19orf44	NM_032207	3346	1.99763	4.01275	2.64382	1.3813	4.80309	1.17548	2.00775	1.51721	3.47471	4.0826
C19orf47	NM_001256440	2104	5.00388	11.3314	7.21686	2.48852	13.1111	3.85059	2.26406	1.56991	5.26651	3.40406
C19orf48	NM_001290152	1619	12.2555	22.3835	30.0123	4.41003	5.11163	7.50613	1.82626	0.745788	1.15883	0.680903
C19orf53	NM_014047	896	4.45466	11.2781	7.79533	9.42568	6.06942	0	2.53117	1.44659	0.643856	6069.42
C19orf54	NM_001353809	2398	2.28682	5.19336	2.45	1.53604	4.45109	0	2.27	2.11887	2.89588	4451.09
C1D	NM_006333	2254	0.678203	0.399308	0	0.797292	0	0	0.587906	399.308	0	0
C1GALT1	NM_020156	6274	1.4932	1.14671	0.486862	0.381529	0	0	0.767439	2.35047	0	0
C1GALT1C1	NM_152692	1904	0.850531	0.751297	2.12662	0.999991	0	0	0.882289	0.353116	0	0
C1QBP	NM_001212	1169	17.757	25.0099	9.57445	26.1941	37.9512	13.9324	1.40837	2.61188	1.44879	2.72375
C1QL4	NM_001008223	2073	2.74529	5.31084	1.47062	8.06773	0	1.96167	1.93382	3.60883	0	0
C1QTNF6	NM_182486	1609	0.980371	3.75222	1.22546	0.864371	0	2.45209	3.82345	3.05939	0	0
C1R	NM_001354346	2550	0.31421	0.185014	0	0.554082	0	0	0.586954	185.014	0	0
C1RL	NM_016546	3335	4.68034	5.46467	1.78478	2.23801	7.29562	9.52304	1.16733	3.06011	3.25842	0.766022
C1orf109	NM_001350755	2489	1.9018	2.23948	1.18854	1.6767	0	1.5854	1.17694	1.88264	0	0
C1orf112	NM_001366769	3891	1.32325	3.89563	2.64648	1.08882	0	0	2.94177	1.47145	0	0
C1orf115	NM_024709	2891	4.22365	3.52968	4.42791	1.84181	1.85637	8.17804	0.835496	0.796964	1.00736	0.226967
C1orf116	NM_023938	5501	0.294366	0.17332	0	0.778606	3.00816	0	0.586799	173.32	3.85856	3008.16
C1orf122	NM_198446	1329	4.91568	5.42669	9.98459	6.86183	4.18596	21.5144	1.10373	0.543451	0.609947	0.194556
C1orf131	NM_152379	1430	1.68249	3.63229	0.700989	0.659264	0	0	2.1576	5.17429	0	0
C1orf159	NM_001330306	2432	3.89358	6.52462	0.748637	1.93633	0	0	1.67531	8.70371	0	0
C1orf174	NM_207356	1645	4.13189	4.00695	1.21508	1.42853	4.96741	2.43146	0.969527	3.29497	3.47486	2.04213
C1orf198	NM_032800	3726	7.21361	5.07125	5.92137	5.06243	2.93387	12.9248	0.702914	0.856287	0.579424	0.226978
C1orf21	NM_030806	10293	0.785653	0.693825	0.883735	0.600286	0.535224	0.785915	0.881996	0.784218	0.890132	0.680155
C1orf210	NM_182517	1483	1.44206	4.07538	1.4419	2.37319	0	0	2.82413	2.82445	0	0
C1orf216	NM_001348691	2862	3.39559	4.16513	2.12212	0.665249	0	0	1.22627	1.9618	0	0
C1orf226	NM_001135240	4156	2.82552	5.27766	3.89709	3.09231	3.98252	6.82287	1.86719	1.35391	1.28746	0.583617
C1orf35	NR_130975	1470	1.69775	4.66496	3.5369	1.66312	7.71088	22.6463	2.74611	1.31857	4.6336	0.340477
C1orf43	NM_001098616	1676	10.421	12.5218	7.44322	9.99991	10.1418	6.38263	1.20147	1.68208	1.01409	1.58872
C1orf50	NM_024097	4759	1.99466	3.28846	0	0.937874	2.71777	0	1.6478	3288.46	2.89471	2717.77
C1orf53	NM_001024594	597	1.1856	0	0	0.696855	0	0	0	0	0	0
C1orf74	NM_152485	4684	1.41781	2.65175	1.8765	0.882328	0	0	1.869	1.41239	0	0
C20orf194	NM_001009984	6909	1.05492	2.34635	2.49073	1.03342	0.39926	2.34522	2.2221	0.941657	0.385975	0.170172
C20orf27	NM_001039140	1327	9.62731	20.9557	24.7967	16.4609	9.93721	3.89033	2.17647	0.845066	0.603648	2.55368
C20orf96	NM_153269	1576	5.80632	9.3641	10.7287	4.15456	46.435	2.52546	1.61247	0.872725	11.1742	18.3794
C21orf58	NM_058180	2970	2.29531	4.76984	5.06313	0.952254	1.83961	0	2.07718	0.941888	1.92982	1839.61
C21orf91	NM_001100420	5396	3.13032	1.3164	1.11782	0.963714	1.01545	0	0.420398	1.1766	1.05259	1015.45
C22orf34	NM_001289922	2512	3.769	13.592	34.1552	6.09184	24.0714	21.2087	3.6053	0.397935	3.95076	1.13492
C22orf39	NM_173793	1977	1.43375	1.92946	6.14438	0.722256	0	0	1.3448	0.313969	0	0
C2CD2	NM_015500	6473	2.99853	4.73286	1.59488	2.84983	8.25789	0.638201	1.57787	2.96568	2.89666	12.9191
C2CD2L	NM_014807	4810	2.99149	5.918	0.299039	3.65712	10.5974	4.78824	1.97762	19.7241	2.89695	2.21275
C2CD3	NM_001286577	7960	2.03478	5.93024	0.762943	1.19583	4.15862	0.508899	2.91301	7.76267	3.4747	8.15576
C2CD5	NM_001286175	4635	2.88293	2.98334	1.31037	1.64312	1.19028	7.86572	1.03447	2.27497	0.723962	0.151306
C2orf15	NM_144706	1517	0.266888	1.25721	1.33449	0.31372	0	0	4.69303	0.941385	0	0
C2orf27A	NM_013310	2292	0.162999	0.191903	0	0	0	0	1.17015	191.903	0	0
C2orf42	NM_001348761	2716	1.21071	1.9009	0.672608	1.4232	0	1.34576	1.56878	2.82197	0	0
C2orf49	NM_001286537	4461	4.53939	2.07268	1.15785	2.61355	0.631054	0.926706	0.456499	1.78856	0.241362	0.680231
C2orf68	NM_001013649	4274	1.99373	3.57754	2.61083	2.45531	3.23396	0.949756	1.7935	1.36975	1.3166	3.40146
C2orf69	NM_153689	3691	4.45331	0.767341	0.814513	2.93661	0.739863	2.17321	0.17227	0.940931	0.251858	0.340291
C2orf72	NM_001144994	3627	0.905062	1.06576	0.56566	0.443208	1.54153	0	1.17625	1.88077	3.4703	1541.53
C2orf76	NM_001322331	685	1.95803	2.76678	0	0.920575	0	0	1.41232	2766.78	0	0
C3orf18	NM_001171740	2568	1.68156	3.16826	1.26111	0.79065	2.29116	0	1.88301	2.51029	2.89416	2291.16
C3orf33	NM_001308229	1811	0.665566	0	0.554584	0	0	0	0	0	0	0
C3orf38	NM_173824	2414	1.84752	2.17557	1.92449	1.44787	0	0	1.17692	1.12988	0	0
C3orf52	NM_024616	2278	2.84409	4.60495	2.2218	1.67152	2.4219	0	1.61856	2.07169	1.44806	2421.9
C3orf62	NM_198562	3748	1.57911	1.85948	0.563929	1.06065	0	0	1.1768	3.29152	0	0
C3orf80	NM_001168214	2578	0.314126	0.369756	0.392605	0.92313	3.21009	0	1.17336	0.93941	3.47363	3210.09
C4orf3	NM_001170330	2960	5.19842	3.38283	3.76187	1.76889	0	0	0.650616	0.899001	0	0
C4orf33	NM_173487	5771	1.30552	0	0	0.255764	0	0	0	0	0	0
C4orf46	NM_001008393	3366	3.21283	1.62134	2.86845	0.944079	0	0	0.504489	0.565037	0	0
C4orf48	NM_001168243	433	14.0277	19.822	9.35121	21.4363	0	0	1.41296	2.1195	0	0
C5orf15	NM_020199	2188	1.95268	0.627108	0.887542	1.25203	0	0	0.320987	0.705771	0	0
C5orf22	NM_018356	3568	3.25108	1.98013	1.40117	1.84495	0	0	0.608881	1.41219	0	0
C5orf24	NM_001135586	5083	9.12152	4.12751	4.58043	6.08688	3.2562	5.97708	0.452453	0.900922	0.534867	0.544691
C5orf34	NM_198566	2502	0.959169	0.188187	0.399527	0.93948	1.08903	0	0.195993	0.469848	1.15796	1089.03
C5orf51	NM_175921	5246	4.78567	2.27229	4.63107	1.90538	0.525837	0	0.474713	0.490556	0.275829	525.837
C5orf63	NM_001164479	5680	0.85545	0.419704	1.42574	0.502769	0	0	0.49005	0.294169	0	0
C6orf120	NM_001317342	3995	2.62809	3.45181	2.27418	2.13874	5.50887	2.02238	1.31293	1.51716	2.57455	2.72261
C6orf132	NM_001164446	6385	2.64268	5.30431	1.80174	3.38887	9.41075	0	2.00641	2.94237	2.77614	9410.75
C6orf226	NM_001008739	557	2.20066	0.863792	1.83381	0	4.9974	0	0.392336	0.47078	4997.4	4997.4
C6orf47	NM_021184	2481	2.78133	5.00907	2.45404	2.11553	4.45827	4.91013	1.80031	2.04032	2.10641	0.907789
C6orf52	NM_001145020	624	0.648859	1.52825	9.73355	0	0	0	2.35166	0.156992	0	0
C6orf62	NM_030939	2452	20.8497	25.4192	20.4667	10.8428	16.7321	36.0368	1.21911	1.24192	1.54301	0.464294
C6orf89	NM_152734	6663	5.93811	7.76932	4.34842	4.15982	4.9034	7.80045	1.30816	1.78629	1.17847	0.628524
C7orf25	NM_001099858	1825	3.10632	0.783749	1.10928	1.04327	1.51148	0	0.252227	0.705899	1.4474	1511.48
C7orf26	NM_001303039	1887	1.48735	9.63288	1.39413	2.84107	5.06626	5.57969	6.4722	6.90463	1.7826	0.907821
C7orf50	NM_001318252	2138	4.86963	11.0273	17.7923	9.68721	30.6225	0	2.26405	0.619747	3.1608	30622.5
C8orf33	NM_023080	2588	4.48715	3.46187	3.48129	2.5464	0	1.54788	0.771337	0.994136	0	0
C8orf37	NM_177965	3340	0.960356	0.848109	0	0.564447	0	0	0.882201	848.109	0	0
C8orf44-SGK3	NM_001204173	4519	2.21855	0.417981	0	0.521528	0	0	0.188318	417.981	0	0
C8orf58	NM_001013842	2056	0.982321	1.85077	0	0.69284	4.01535	0	1.88217	1850.77	5.78714	4015.35
C8orf76	NM_032847	1310	4.22433	4.26366	4.52586	4.25624	0	3.01851	1.00907	0.94186	0	0
C8orf82	NM_001001795	2455	4.40141	13.5743	8.90727	10.3477	7.13918	25.1606	3.08338	1.52378	0.689862	0.283733
C9orf116	NM_001048265	675	1.12166	1.32084	1.40198	2.63706	0	5.61049	1.17653	0.941456	0	0
C9orf129	NM_001098808	1154	0	0	0	0.412332	0	0	0	0	0	0
C9orf16	NM_024112	704	7.95092	14.044	18.4569	17.3575	19.3449	5.68137	1.76612	0.760867	1.11443	3.40437
C9orf40	NM_017998	2351	2.43821	1.23047	0.870698	3.07092	4.74589	0	0.504454	1.41157	1.54492	4745.89
C9orf43	NM_001278630	1914	0	0.489503	0.519627	0.732986	0	0	489.503	0.940218	0	0
C9orf72	NM_001256054	3338	1.81962	0.428496	0.303193	0.855539	3.30566	0	0.235357	1.40863	3.85932	3305.66
C9orf78	NM_016520	1795	6.23655	4.06532	3.34089	1.30911	12.1389	0	0.65175	1.21647	9.26555	12138.9
C9orf85	NM_001365053	3820	1.23165	3.62604	0.76975	0.904882	0	0	2.94165	4.70456	0	0
CA11	NR_136241	2363	0.658782	4.65445	13.7241	3.09749	5.98386	35.1485	7.05453	0.33912	1.93122	0.170241
CA13	NM_198584	3884	2.20583	1.36055	0.262582	1.91385	0.715543	0	0.616515	5.16175	0.373681	715.543
CA2	NM_000067	1562	1.94437	1.43098	3.03804	1.71422	1.65576	12.1574	0.735582	0.470866	0.965336	0.136182
CA5B	NM_007220	6837	0.335582	0.474274	0.335612	0.23664	0	0	1.40909	1.40896	0	0
CA8	NM_001321837	3888	0.207099	0.365858	0	0.852328	0	0	1.7581	365.858	0	0
CAAP1	NM_024828	2789	3.45233	1.52444	1.43832	2.36728	0	0	0.441441	1.05914	0	0
CAB39	NM_001130850	3695	10.2581	6.35103	2.11497	6.83724	5.40328	7.40555	0.619063	3.00148	0.790157	0.729526
CAB39L	NM_001287338	3697	0.560066	0.395682	0.560007	0.131532	0	0	0.705231	0.705306	0	0
CABIN1	NM_012295	7233	4.48553	9.63949	4.48536	3.49318	7.25738	1.68272	2.14854	2.14862	2.07699	4.31033
CABLES1	NM_001100619	5005	1.21351	3.14388	2.02255	1.80684	5.51164	1.61862	2.58861	1.55364	3.04874	3.40304
CABLES2	NM_031215	3785	2.24654	5.16507	4.01165	2.76669	5.83051	0	2.2981	1.2872	2.10663	5830.51
CABP4	NM_145200	4013	0	0	0	0.118393	0	0	0	0	0	0
CACFD1	NM_001242369	2880	1.68715	6.62261	2.46038	3.47077	5.74703	0	3.92299	2.69061	1.65536	5747.03
CACHD1	NM_020925	5933	1.84269	2.44108	0.383836	0.992764	0	0.768056	1.32402	6.34316	0	0
CACNA1A	NM_023035	8659	0.468644	0.772599	0.117101	0.60598	1.91566	6.09503	1.64507	6.54187	3.15605	0.314247
CACNA1B	NM_000718	9790	0.289532	0.876664	0.723717	0.388901	0.84527	0	3.01745	1.20966	2.16791	845.27
CACNA1G	NM_018896	8599	0.73655	2.57315	0.368261	1.84706	6.0216	6.38623	3.48879	6.96838	3.25833	0.942756
CACNA1H	NM_021098	8218	5.35701	41.0327	6.75861	10.9465	57.982	7.01176	7.65819	6.07027	5.29639	8.26807
CACNA2D2	NM_001174051	5717	2.42387	3.44184	3.56436	2.09502	11.4131	3.5659	1.41939	0.965356	5.44514	3.19973
CACNB1	NM_000723	3711	1.2984	4.71473	1.89357	2.28961	5.89755	4.33014	3.6284	2.48855	2.57466	1.36166
CACNB2	NM_201596	6129	1.19154	0.233783	0.744599	0.583571	0	0.993295	0.196038	0.313551	0	0
CACNB3	NM_000725	2931	3.83303	6.28676	1.36887	3.54019	7.46063	20.5419	1.63973	4.58932	2.10682	0.363173
CACTIN	NM_021231	2676	2.72375	4.811	4.91765	2.31239	0	3.02751	1.76567	0.978113	0	0
CACUL1	NM_153810	11035	9.55251	10.1167	9.31187	6.42666	13.5064	3.00508	1.05895	1.08631	2.10129	4.49301
CACYBP	NM_014412	2869	3.17594	1.71408	2.31559	1.08882	0	0	0.539537	0.739912	0	0
CAD	NM_004341	7286	8.93647	23.5263	6.83014	5.88805	9.69414	6.83304	2.63233	3.44398	1.64613	1.41851
CADM4	NM_145296	2189	8.93231	5.47826	6.04759	9.40619	39.2996	83.7725	0.61324	0.90571	4.17762	0.469118
CADPS2	NM_001363389	5791	0.73426	0.471555	0.834241	0.509995	0	1.33558	0.641344	0.564573	0	0
CALB2	NM_001740	1454	0.551246	1.62288	0.688875	1.94414	3.75571	11.0302	2.9387	2.35243	1.93081	0.340462
CALCOCO1	NM_020898	5575	5.58336	6.26165	5.64968	5.62564	12.6789	1.32984	1.12128	1.10812	2.25337	9.52702
CALCOCO2	NM_001261390	3707	9.49229	4.82668	1.88746	8.87576	1.46965	0	0.508431	2.55589	0.165561	1469.65
CALCRL	NM_001271751	5946	0.202774	0.238769	0	0.0794153	0	0	1.17173	238.769	0	0
CALD1	NM_033138	5011	4.87582	4.10113	5.03037	2.72932	2.10895	2.32272	0.840944	0.815112	0.772421	0.907577
CALM1	NM_001363670	4843	10.9415	7.73052	6.30302	8.81678	15.4477	54.2526	0.706469	1.22629	1.75188	0.284731
CALM2	NM_001305624	1370	15.6652	7.30901	13.3001	11.1181	70.4747	208.457	0.466545	0.549504	6.33814	0.338076
CALM3	NM_001329922	2215	50.4566	71.9009	60.7831	45.1283	80.9515	145.392	1.42498	1.18289	1.79377	0.556776
CALML4	NM_033429	4635	3.49448	4.938	5.8968	2.67005	5.95161	0.873961	1.41268	0.837261	2.22819	6.80213
CALN1	NM_031468	9424	0.0855704	0	0	0	0	0	0	0	0	0
CALR	NM_004343	1901	40.472	43.3744	58.0041	33.7507	12.9917	48.7545	1.07169	0.747769	0.384921	0.266467
CALU	NM_001199672	6081	9.0881	6.41331	6.72562	6.40213	3.12912	1.31281	0.705604	0.953422	0.488687	2.38172
CAMK1	NM_003656	1453	2.44262	1.59786	4.07084	0.638023	0	5.43011	0.653894	0.392419	0	0
CAMK1D	NM_153498	8088	1.85142	1.29637	1.37602	3.11756	4.09083	2.00237	0.699822	0.94143	1.31177	2.04197
CAMK2D	NM_001321571	5785	17.4201	11.4139	12.8781	11.3143	12.4676	6.78071	0.655175	0.886232	1.10184	1.83842
CAMK2G	NM_001367534	3878	1.9135	4.50651	5.88745	3.28749	1.00272	2.945	2.35388	0.765313	0.304918	0.340366
CAMK2N1	NM_018584	2326	4.13367	8.1127	3.44461	20.6515	151.364	350.639	1.96212	2.3545	7.3291	0.43168
CAMK2N2	NM_033259	1452	1.4887	2.1035	2.23299	6.12491	40.5674	81.9109	1.41203	0.941591	6.62226	0.495256
CAMK4	NM_001323375	12041	0.542596	0.399308	0.593464	0.438536	0.693114	0	0.734567	0.67171	1.57692	693.114
CAMKK1	NM_172206	3500	1.27262	2.58847	0	2.31188	2.36444	1.15734	2.03238	2588.47	1.02229	2.04122
CAMKK2	NM_006549	5603	4.09101	8.09321	5.7272	4.6166	10.0332	6.54813	1.97781	1.41287	2.17281	1.53198
CAMKMT	NM_024766	1512	2.604	2.75971	0.650918	1.22437	0	0	1.05939	4.23321	0	0
CAMLG	NM_001745	2167	3.251	4.04085	3.16057	2.54764	0	5.42042	1.24257	1.27812	0	0
CAMSAP1	NM_015447	8018	4.13893	8.62296	3.71434	4.74061	15.5443	9.55515	2.08288	2.32091	3.27828	1.62663
CAMSAP2	NM_001297707	7370	4.27513	3.80788	3.97346	2.44823	1.49352	0.548285	0.890497	0.958087	0.609795	2.71903
CAMSAP3	NM_001080429	4218	3.19299	10.0265	5.32145	5.57316	9.88738	8.71151	3.13917	1.88381	1.77379	1.13485
CAMTA1	NM_001349609	7965	1.007	1.18578	0.479478	2.08567	3.59353	7.19589	1.17636	2.46791	1.72213	0.499317
CAMTA2	NM_001171167	4938	6.84343	18.6722	7.5106	8.43686	19.8991	21.707	2.72809	2.48578	2.35831	0.91667
CAND1	NM_018448	11176	8.10943	8.43513	4.89919	3.33639	3.22262	2.02812	1.04004	1.72139	0.965611	1.58819
CANT1	NM_138793	3482	10.1948	29.5404	14.6045	12.792	42.1396	8.02147	2.8973	2.02256	3.29396	5.2527
CANX	NM_001363993	5146	44.9107	33.0408	44.3771	26.877	8.9166	23.7323	0.735684	0.744529	0.331744	0.3757
CAP1	NM_001350476	2758	3.21258	1.89139	1.46012	2.05983	1.98956	0	0.58856	1.29447	0.965415	1989.56
CAP2	NM_006366	2924	0.401307	0.314914	1.00326	0	0	2.67643	0.782769	0.313578	0	0
CAPG	NM_001747	1250	9.06096	10.6697	1.56211	9.18203	6.38558	9.37698	1.17742	6.82595	0.695368	0.680912
CAPN1	NM_001198869	3031	17.0595	24.7602	18.5134	11.6589	14.4145	11.9065	1.45132	1.33734	1.23624	1.21054
CAPN10	NM_023083	2621	5.36024	7.57443	2.29713	8.10131	5.21666	9.19258	1.41281	3.2959	0.643848	0.567424
CAPN12	NM_144691	3129	8.54118	7.00986	4.2057	7.91044	8.81617	9.06231	0.820618	1.66636	1.11436	0.972732
CAPN15	NM_005632	4888	2.30463	8.89518	4.69441	3.71245	10.4668	10.2467	3.85802	1.89444	2.81861	1.02138
CAPN2	NM_001748	3366	12.1898	12.8503	9.28707	12.282	11.8631	6.96823	1.0541	1.38352	0.965818	1.70222
CAPN5	NM_004055	4364	2.85936	2.49819	1.38352	3.46968	7.54052	1.84545	0.873383	1.80437	2.17264	4.08379
CAPN6	NM_014289	3532	0.225248	0.265238	0.563122	0.264742	0	0	1.17233	0.470179	0	0
CAPN7	NM_014296	4348	2.503	2.94735	0.69522	3.05121	0	0.927329	1.17706	4.23336	0	0
CAPNS1	NM_001302632	1533	27.509	23.3231	33.6972	13.2581	9.37017	35.7753	0.847805	0.692117	0.7067	0.26191
CAPRIN1	NM_005898	5514	16.2351	10.459	7.09803	7.10315	2.97571	4.36981	0.644178	1.47329	0.418869	0.680814
CAPRIN2	NM_001002259	4485	4.87539	3.9337	4.06264	3.92682	4.92053	1.80634	0.806683	0.968023	1.25274	2.72252
CAPS2	NM_032606	2403	3.19104	1.38439	0.419832	0.987071	0	0	0.4337	3.28964	0	0
CAPZA1	NM_006135	2356	5.61584	2.43618	4.43333	2.08465	1.00675	1.47838	0.433728	0.549392	0.482703	0.680521
CAPZA2	NM_006136	5068	4.38275	1.31549	1.28892	2.82844	9.36696	3.43874	0.300084	1.01983	3.31053	2.72316
CAPZB	NM_001282162	1677	16.848	10.0336	12.1029	12.5202	19.7889	25.1847	0.595505	0.828958	1.58043	0.785721
CARD10	NM_014550	4111	4.67347	12.2906	6.23103	6.22615	17.6877	3.1168	2.62931	1.97217	2.84042	5.67314
CARD19	NM_032310	857	5.04586	5.94175	8.40944	7.90854	11.4583	8.41297	1.17732	0.706473	1.44866	1.36182
CARD6	NM_032587	4038	0	0	0	0	0	0	0	0	0	0
CARD8	NM_001351782	5917	0.884538	0.801244	0.170056	0.559849	0	0.680701	0.90481	4.68411	0	0
CARHSP1	NM_001278260	2834	8.02903	8.82429	6.0214	6.92125	0.911614	1.33863	1.09891	1.46525	0.131693	0.680497
CARM1	NM_199141	3293	11.8696	18.4755	17.7355	12.3489	34.3893	5.45939	1.55641	1.04166	2.78457	6.29796
CARMIL1	NM_017640	5485	4.24986	4.30201	1.30472	2.191	1.52377	1.49174	1.01203	3.29474	0.695149	1.02078
CARMIL2	NM_001013838	4462	0.867831	0.613148	0.216896	0.815978	4.13846	6.07717	0.705716	2.81395	5.06557	0.680873
CARNMT1	NM_152420	4259	2.12052	2.27991	0.921923	2.49268	0.62803	0	1.07466	2.47031	0.251849	628.03
CARS2	NM_024537	1838	4.8787	7.74312	9.01456	4.98681	5.78004	2.12198	1.5868	0.858862	1.15883	2.7226
CASC3	NM_007359	3890	8.91238	8.21332	5.81212	5.2382	1.97979	7.75283	0.921459	1.41289	0.377881	0.255331
CASD1	NM_022900	3928	0.626301	0.491679	0.260852	0.368099	0	2.08855	0.783801	1.8777	0	0
CASK	NM_001367721	8831	2.34288	2.3565	2.1963	1.26225	0.997552	7.32436	1.00539	1.07245	0.789671	0.136178
CASKIN1	NM_020764	5839	2.20414	7.2005	3.73269	3.84471	9.68772	1.42259	3.26533	1.92852	2.5191	6.80512
CASKIN2	NM_020753	4969	4.52073	9.22097	6.45796	2.46728	6.59942	0.80758	2.03926	1.42762	2.6737	8.16174
CASP10	NM_032977	5667	0.548448	0.161445	0	0.483572	0.467053	0	0.293832	161.445	0.963847	467.053
CASP2	NM_032982	4089	11.5969	11.7373	14.1361	4.16843	6.52917	0.958755	1.01202	0.830249	1.56596	6.80295
CASP3	NM_001354777	2635	1.51483	0.713496	0.757405	1.06838	0	0	0.470698	0.940785	0	0
CASP4	NM_001225	1296	0.920921	0.361507	0	0.721745	0	0	0.392124	361.507	0	0
CASP6	NM_001226	1634	3.41298	1.14825	0	0.286567	0	0	0.336337	1148.25	0	0
CASP7	NM_001267057	2622	3.70641	4.5464	1.54423	3.0861	3.15622	0	1.2263	2.94221	1.02239	3156.22
CASP8	NM_001080125	2929	1.79342	1.29963	1.3796	1.62174	0	0	0.724264	0.941355	0	0
CASP8AP2	NM_001137667	6744	2.82603	2.31499	2.15015	1.51656	0	0.614597	0.818876	1.07616	0	0
CAST	NM_001750	4488	5.84983	6.48329	4.30111	6.26972	2.93028	0	1.1081	1.507	0.467296	2930.28
CASTOR1	NM_001037666	1501	0.49926	1.1759	0	1.46729	0	0	2.35057	1175.9	0	0
CASTOR2	NM_001145064	8091	3.72448	6.32501	6.71397	2.79961	8.63025	3.04156	1.69777	0.941928	3.08156	2.83651
CASZ1	NM_001079843	7932	1.93259	4.13222	1.52565	3.10873	7.96876	4.07016	2.13708	2.70672	2.56253	1.95737
CAT	NM_001752	2291	5.10564	4.35359	4.40126	2.48341	3.59813	1.76121	0.852534	0.988944	1.44829	2.04183
CAV1	NM_001753	2455	18.657	8.43631	10.4475	2.45625	2.0336	1.49306	0.452156	0.807422	0.82759	1.36113
CAV2	NM_001233	2953	6.29015	5.24666	2.29321	4.31317	0.892712	2.62188	0.833975	2.28691	0.206926	0.340355
CAVIN1	NM_012232	3570	10.0284	15.6143	8.91384	11.3956	4.5546	1.11471	1.55685	1.7515	0.399646	4.08226
CAVIN3	NM_145040	1028	0.390452	0	1.95229	1.37699	0	0	0	0	0	0
CBARP	NM_152769	4239	3.31647	8.92654	7.50137	7.42584	37.6561	7.8995	2.69077	1.18983	5.07027	4.76629
CBFA2T2	NM_005093	7737	1.46538	2.0337	2.48588	0.799701	1.42617	0.523505	1.38688	0.817773	1.78116	2.71908
CBFA2T3	NM_005187	4480	1.66714	3.59912	3.93608	3.26617	16.4051	3.70606	2.15756	0.914158	5.02118	4.42536
CBFB	NM_022845	3100	11.161	6.30235	6.85287	6.29133	0.889247	5.22349	0.564623	0.919532	0.141322	0.170208
CBL	NM_005188	11168	8.02216	9.59508	9.55415	4.23821	2.21058	1.8033	1.19592	1.00418	0.521461	1.22517
CBLB	NM_001321786	6685	1.2113	1.71181	1.21139	0.0711672	0	0	1.41203	1.41193	0	0
CBLC	NM_012116	1576	14.5073	32.3679	12.0889	15.8566	41.6128	2.54609	2.231	2.67726	2.62416	16.3374
CBLL1	NM_024814	3987	3.92869	2.04413	1.82723	2.14794	1.55603	1.82794	0.520175	1.11809	0.724091	0.85078
CBR3	NM_001236	998	0.728239	0.857537	0	2.14027	0	3.6428	1.17593	857.537	0	0
CBR4	NM_032783	3439	7.17104	5.9927	5.78281	4.48667	2.36381	0	0.835564	1.03612	0.526733	2363.81
CBWD1	NM_018491	1932	0	0	0	0	0	0	0	0	0	0
CBWD2	NM_172003	1827	0.221516	0	0	0.260509	0	0	0	0	0	0
CBWD3	NM_201453	1723	0	0	0	0	0	0	0	0	0	0
CBWD5	NM_001330668	1716	0.235933	0	0.589888	0	0	0	0	0	0	0
CBWD6	NM_001085457	1719	0	0	0	0	0	0	0	0	0	0
CBX1	NM_006807	2403	3.51093	4.52808	7.52317	1.96524	2.27793	1.67247	1.28934	0.601805	1.15852	1.3612
CBX2	NM_005189	4628	5.41171	11.18	5.69629	4.12938	10.9954	0.949756	2.0655	1.96233	2.66209	11.5649
CBX3	NM_007276	2098	8.8615	3.17579	5.29734	4.52894	0	0	0.35834	0.599393	0	0
CBX4	NM_003655	2675	8.71309	12.9602	6.11416	22.1018	79.1439	15.292	1.48727	2.11936	3.58072	5.17518
CBX5	NM_001127322	11703	11.253	10.2375	13.1309	3.42026	2.38813	8.0659	0.909679	0.779593	0.698026	0.29604
CBX6	NM_014292	6052	17.6685	39.6777	39.0794	16.5228	54.1425	39.4245	2.24554	1.01528	3.27663	1.37329
CBX7	NM_175709	4109	2.4818	5.61106	8.18955	1.86706	2.02881	2.97926	2.25998	0.685066	1.08605	0.680749
CBX8	NM_020649	3752	2.61918	4.93483	1.96429	1.23152	0	0	1.88339	2.51099	0	0
CBY1	NM_001002880	1272	2.54667	7.49728	0.795823	4.49047	0	0	2.9428	9.40897	0	0
CC2D1A	NM_017721	3581	4.11603	9.56271	3.3372	6.4076	11.3677	2.22574	2.32272	2.86463	1.77382	5.1051
CC2D1B	NM_032449	5654	1.64721	3.96371	1.96937	2.60976	0	0	2.40486	2.01166	0	0
CC2D2A	NM_001080522	5240	1.70004	1.54692	2.125	0.363354	0	0	0.909395	0.727619	0	0
CCAR1	NM_018237	4658	6.90076	6.42056	4.04661	2.80406	1.16073	3.40904	0.930279	1.58626	0.4138	0.340387
CCAR2	NM_021174	5019	9.53733	10.7528	4.31184	6.08264	7.60315	4.05998	1.12732	2.49319	1.24977	1.87224
CCDC102A	NM_033212	2432	0.666754	2.15934	1.25004	1.95962	2.27132	6.67079	3.23374	1.72604	1.15847	0.340436
CCDC103	NM_001258395	3412	0.467542	0.8259	0	0.274815	0	0	1.7627	825.9	0	0
CCDC107	NM_001195200	1177	3.44037	5.26651	2.58014	3.2353	4.68742	0	1.53035	2.04038	1.44839	4687.42
CCDC110	NM_152775	2870	0.279609	0.493945	0	0.493061	0	0	1.76026	493.945	0	0
CCDC112	NM_001040440	2387	2.10898	2.86541	0	0.572111	0	0	1.35802	2865.41	0	0
CCDC113	NM_014157	5266	1.76857	3.16917	2.1145	1.35583	1.04764	0	1.79093	1.49807	0.772126	1047.64
CCDC115	NM_032357	1769	1.42578	1.91867	1.01837	0.957728	0	0	1.34476	1.88221	0	0
CCDC117	NM_173510	3964	4.2613	2.62845	1.52185	2.62384	2.07355	1.01496	0.616674	1.72601	0.789969	2.04097
CCDC12	NM_144716	1018	3.18213	4.21553	0	3.74062	0	7.95848	1.32433	4215.53	0	0
CCDC120	NM_001163321	3467	3.23573	5.44318	3.46664	3.12435	1.57449	1.15603	1.68169	1.56971	0.503779	1.3608
CCDC121	NM_001142683	2762	0.293178	0.172595	0	0	0	0	0.586703	172.595	0	0
CCDC122	NM_144974	2058	0.59136	0	0	0.231677	0	0	0	0	0	0
CCDC124	NM_138442	1049	13.5106	13.6366	8.68495	14.5204	2.62969	15.4465	1.00925	1.56997	0.181091	0.170233
CCDC126	NM_138771	2470	1.14617	1.15686	0.818667	0.769847	0	0	1.00845	1.41138	0	0
CCDC127	NM_145265	9283	1.99611	3.69366	1.42574	2.01122	0	0	1.84951	2.58888	0	0
CCDC130	NM_030818	1673	4.48867	2.50372	2.9529	7.49818	4.8283	2.36335	0.557662	0.847598	0.643843	2.04212
CCDC134	NM_024821	1270	3.05145	2.87456	3.05131	2.51085	4.15761	3.05264	0.941724	0.941766	1.6552	1.36153
CCDC136	NM_001367764	3901	1.15117	1.46851	1.4389	1.3532	0	1.91938	1.27456	1.01987	0	0
CCDC137	NM_199287	2093	6.72326	12.2147	6.24256	8.1289	7.8517	0	1.81652	1.95637	0.96578	7851.7
CCDC138	NM_001351544	2427	1.66841	0.982179	1.66837	0.392186	0	0	0.588339	0.588354	0	0
CCDC14	NM_001366335	4126	5.42231	7.86731	4.35695	2.73165	1.31925	0	1.45065	1.80528	0.482774	1319.25
CCDC142	NM_001365575	4128	2.14638	4.61547	1.86634	1.42612	2.54306	0	2.14935	2.47168	1.78195	2543.06
CCDC149	NM_001330643	3994	0.304034	0.596922	1.01376	1.07254	0	0	1.95691	0.588241	0	0
CCDC15	NM_025004	3812	0.831619	0.734436	0	0.122189	0	0	0.882079	734.436	0	0
CCDC150	NM_001080539	3597	0.659291	0.776316	0.549393	0.904152	0	0	1.17572	1.41048	0	0
CCDC157	NM_001318334	4907	0.99606	2.24827	1.86761	1.56123	1.69653	0	2.2549	1.20318	1.08597	1696.53
CCDC163	NM_001358407	2155	0.935592	0.66101	0.467711	0.439923	0	0	0.705761	1.41027	0	0
CCDC167	NM_138493	572	1.95921	0	6.53087	2.30319	0	0	0	0	0	0
CCDC171	NM_001355547	6319	0.576689	0.4527	0	0.0753278	0	0	0.78364	452.7	0	0
CCDC173	NM_001085447	2153	0.373321	0.439646	0	0.219414	0	0	1.17452	439.646	0	0
CCDC174	NM_016474	2940	1.50473	2.09417	3.4198	1.28641	0	0	1.3908	0.612186	0	0
CCDC18	NM_001306076	4787	1.69173	1.79294	0.845779	0.894882	0	0	1.0592	2.11737	0	0
CCDC186	NM_018017	7228	2.25265	2.13505	1.09879	1.61458	0.748558	2.74821	0.947375	1.94133	0.463336	0.272281
CCDC189	NM_001014979	1363	1.31036	3.08623	0	0.924225	0	0	2.35346	3086.23	0	0
CCDC191	NM_020817	3889	0.814742	0.839407	0	1.19714	0	1.01877	1.02901	839.407	0	0
CCDC22	NM_014008	2310	1.39686	0.205591	0.436445	1.23152	0	1.74682	0.147076	0.469982	0	0
CCDC24	NM_001349128	1358	2.98182	3.86236	9.69051	3.15457	8.12539	2.98293	1.29487	0.39853	2.57494	2.72305
CCDC25	NM_018246	3627	3.00361	1.30996	2.2248	2.6153	0	0	0.435984	0.588537	0	0
CCDC28A	NM_015439	1496	2.7067	1.27488	2.02994	1.27269	0	0	0.470836	0.627731	0	0
CCDC28B	NM_001301011	1453	1.94548	2.00451	3.64789	3.43048	1.65677	2.43292	1.02982	0.549349	0.482815	0.680701
CCDC3	NM_031455	2747	1.62677	4.17963	2.21822	2.08611	9.06762	2.95898	2.5677	1.88338	4.34458	3.06341
CCDC32	NM_001080791	1905	2.53081	3.22845	3.69058	1.98327	0	2.1098	1.27515	0.874546	0	0
CCDC34	NM_030771	1452	1.36514	2.89369	1.36517	0.320946	13.0209	0	2.11815	2.1181	40.4444	13020.9
CCDC40	NM_017950	4288	0.942122	0.443725	1.17758	0.775175	0.641828	1.88498	0.470485	0.376491	0.826911	0.340316
CCDC43	NM_144609	2114	4.92433	3.56839	4.2612	2.67158	0	0	0.724497	0.837218	0	0
CCDC47	NM_020198	3282	13.3832	8.08886	6.51368	8.91014	2.42051	2.36958	0.604357	1.24163	0.271628	1.02106
CCDC50	NM_178335	8629	5.47506	3.46332	2.6016	3.45734	0.308219	1.35794	0.632448	1.33072	0.0891233	0.226808
CCDC51	NM_001256964	1609	0.537677	2.21627	2.01644	1.89633	0	0	4.11428	1.09856	0	0
CCDC57	NM_198082	3026	6.18312	13.4776	4.60431	8.19613	11.6509	15.7928	2.17938	2.92653	1.42134	0.737685
CCDC59	NM_014167	1584	1.75288	1.4744	0.625998	1.17743	0	0	0.840652	2.35152	0	0
CCDC6	NM_005436	5726	7.01991	4.01039	4.3438	4.82039	3.31442	1.39061	0.571206	0.923032	0.687441	2.38171
CCDC68	NM_001143829	4029	0.602979	0.473368	0	1.7721	0	0	0.783749	473.368	0	0
CCDC69	NM_015621	3398	2.02519	1.9639	3.87159	0.560141	0.811563	0	0.969258	0.507129	1.44627	811.563
CCDC71	NM_022903	1791	4.02249	3.15775	5.58657	2.88954	0	0	0.784829	0.565138	0	0
CCDC71L	NM_175884	6798	1.24556	2.8635	0.889619	1.11554	3.23252	1.18669	2.29712	3.21518	2.89513	2.72167
CCDC73	NM_001008391	4032	0.702966	0	0.251045	0.590213	0	1.5069	0	0	0	0
CCDC74A	NM_001349042	1614	0	0	0	0	0	0	0	0	0	0
CCDC74B	NM_207310	1527	0	0.307027	0	0	0	0	307.027	307.027	0	0
CCDC77	NM_032358	2298	2.2239	0.604264	1.71048	0	0	0	0.271592	0.353066	0	0
CCDC82	NM_024725	2715	1.48319	0.349179	0.741599	1.56918	0	0	0.235265	0.470212	0	0
CCDC85B	NM_006848	963	11.5037	34.0592	4.10822	22.7953	35.8257	26.3043	2.96044	8.28848	1.57156	1.36192
CCDC85C	NM_001144995	16564	3.28458	7.90366	6.96143	5.95936	4.37788	10.0004	2.40556	1.13519	0.734499	0.437728
CCDC86	NM_024098	1851	2.41149	2.60298	5.02368	2.83472	1.36896	2.01033	1.07896	0.518039	0.482758	0.680626
CCDC87	NM_018219	2888	0	0	0	0	0	0	0	0	0	0
CCDC88A	NM_001254943	9526	2.45483	2.93974	1.14413	1.6629	4.81872	2.49743	1.19705	2.56717	2.89603	1.9287
CCDC88B	NM_032251	4934	1.06993	2.32596	1.64599	2.03166	3.36407	2.47002	2.17191	1.41225	1.65501	1.36141
CCDC88C	NM_001080414	7519	2.14732	4.4882	0.939344	1.38824	4.75427	0	2.08917	4.77293	3.42222	4754.27
CCDC9	NM_015603	2027	3.11785	6.425	5.3586	3.89405	3.98252	7.79761	2.06005	1.19878	1.02246	0.510671
CCDC90B	NM_021825	4018	1.00776	0.830705	1.25961	1.06619	0	0	0.823488	0.65897	0	0
CCDC91	NM_018318	2519	2.78727	1.45872	0.774134	2.00224	1.05489	0	0.523163	1.88189	0.526589	1054.89
CCDC92	NM_025140	2790	1.87373	4.6336	2.34213	3.74449	0	3.74905	2.47161	1.97753	0	0
CCDC93	NM_019044	6833	2.57135	3.50956	6.57425	1.71736	1.9905	0.584556	1.36434	0.533752	1.15838	3.39934
CCDC96	NM_153376	2152	0	0	0.940728	0.221166	0	0	0	0	0	0
CCDC97	NM_052848	3329	5.2611	6.40895	12.0943	7.10855	0	1.20988	1.21795	0.529874	0	0
CCM2	NM_001363458	1987	2.58187	5.82726	4.84082	3.79376	11.7262	4.30481	2.25612	1.20353	3.09009	2.72334
CCNA2	NM_001237	2748	5.2276	2.82833	1.76597	0.996487	0	0	0.540935	1.60067	0	0
CCNB1	NM_031966	2027	7.47448	6.38113	6.53987	1.31787	0	0	0.853608	0.975577	0	0
CCNB1IP1	NM_021178	1470	5.3811	3.16826	1.34522	3.79529	0	0	0.588667	2.35346	0	0
CCNB2	NM_004701	1488	5.62042	2.46256	2.61394	1.22911	1.78083	0	0.438068	0.941728	1.44769	1780.83
CCNB3	NM_033031	4695	0.179452	0.528482	0.224395	0.21102	0	0	2.92866	2.34469	0	0
CCNC	NM_005190	2153	8.7761	3.51363	3.0715	3.50756	1.1957	3.51177	0.400319	1.14358	0.340796	0.340388
CCND1	NM_053056	4238	39.4642	40.6899	40.3595	43.7265	16.7226	23.6119	1.03103	1.00816	0.382427	0.708196
CCND3	NM_001760	2024	3.68996	6.86084	3.39857	2.73954	19.8459	1.94284	1.85882	2.01815	7.24161	10.2096
CCNDBP1	NM_012142	3515	1.77501	1.82893	0.277234	1.69531	0	1.10979	1.02979	6.57334	0	0
CCNE1	NM_001238	1954	3.72634	7.06951	3.10519	2.19013	19.7444	0	1.89666	2.27595	9.01107	19744.4
CCNE2	NM_057749	2726	2.6738	1.22439	0.371146	1.57152	0	0	0.457751	3.29009	0	0
CCNF	NM_001761	4230	3.96702	8.06393	2.59733	2.22064	1.9304	4.72456	2.03223	3.10351	0.868909	0.408502
CCNG1	NM_001364015	2414	13.2899	7.2451	3.6915	6.7503	3.35317	1.64133	0.545118	1.96211	0.49667	2.04172
CCNG2	NM_004354	5471	4.21644	3.31004	1.84927	2.52166	0	0.739953	0.784845	1.78895	0	0
CCNH	NM_001364075	2394	3.77349	1.709	2.17692	2.04728	3.95493	2.90381	0.452776	0.784694	1.93085	1.36151
CCNI	NM_001348133	1496	16.5113	19.4429	11.5032	20.3635	33.1915	81.2339	1.17748	1.69007	1.62987	0.408586
CCNJ	NM_001134375	3957	1.56571	1.38266	1.22315	0.345033	0.666589	0	0.882528	1.12949	1.92637	666.589
CCNJL	NR_131769	5909	1.21961	2.44153	0.304808	1.86378	0.830842	0	2.00025	7.98388	0.445545	830.842
CCNK	NM_001099402	3514	8.39073	10.6124	5.82665	5.66228	5.29264	7.77214	1.26463	1.82105	0.934553	0.680889
CCNL1	NM_020307	2319	5.93862	3.57781	7.94081	3.57157	0.940848	2.76316	0.602364	0.450504	0.263353	0.340374
CCNO	NM_021147	1360	1.10258	2.92134	0	0.324012	0	0	2.64715	2921.34	0	0
CCNQ	NM_152274	1253	0.313617	1.108	0.784055	0.368683	0	0	3.52174	1.41136	0	0
CCNT1	NM_001240	6788	7.09301	5.99487	7.14995	3.16026	2.3381	0.572235	0.84506	0.838332	0.73961	4.07878
CCNT2	NM_001241	6818	3.33394	1.85957	0.292348	0.549922	0	0.58511	0.557602	6.33912	0	0
CCNY	NM_145012	5067	6.96971	9.72697	7.09849	4.48412	4.68943	0.860741	1.39541	1.37009	1.04555	5.44182
CCNYL1	NM_001330218	3911	1.44944	2.31644	0.51755	1.8256	0	1.03573	1.59706	4.46714	0	0
CCP110	NM_001323569	5502	2.45457	1.7517	1.30161	0.786854	2.53354	0	0.713355	1.34476	3.21575	2533.54
CCPG1	NM_001204450	3720	0.761907	0.384532	0.544201	1.02364	0	3.2668	0.504035	0.705303	0	0
CCS	NM_005125	1066	5.10089	7.39267	5.88538	10.1472	8.0191	3.92521	1.44901	1.2559	0.790199	2.04245
CCSAP	NM_145257	5217	2.92568	1.58291	2.17438	0.836416	0	0	0.540855	0.727646	0	0
CCSER1	NM_001145065	9419	0.652591	0.537909	0.163133	0.767073	1.33368	0	0.823006	3.27727	1.7364	1333.68
CCSER2	NM_001351290	7824	3.06722	1.74363	1.18981	2.05144	3.60267	0.528973	0.568287	1.46423	1.75531	6.79783
CCT2	NM_006431	1916	15.9569	14.8856	7.25274	4.872	0	10.3656	0.932806	2.05213	0	0
CCT4	NM_006430	2376	17.928	17.0513	13.5747	11.6516	8.22053	1.72446	0.951047	1.25602	0.705465	4.76426
CCT5	NM_012073	3293	6.06015	4.02217	3.30535	3.49712	0	4.40905	0.663599	1.2165	0	0
CCT6A	NM_001762	2584	10.1081	5.0117	3.03989	5.27097	0	3.04114	0.495762	1.6481	0	0
CCT7	NM_006429	1847	16.3144	13.5462	15.6863	9.34291	5.69952	4.18472	0.830268	0.863513	0.609972	1.36166
CCT8	NM_006585	1854	7.16247	8.31539	0.504283	3.79464	2.74895	8.07345	1.1608	16.4569	0.724241	0.340451
CCZ1	NM_015622	2379	0	0.0870228	0	0	0	0	87.0228	87.0228	0	0
CCZ1B	NM_198097	1845	0	0.0864789	0	0	0	0	86.4789	86.4789	0	0
CD109	NM_133493	9031	5.30884	4.58438	2.87549	2.80822	1.50688	0.885106	0.863374	1.59374	0.536405	1.70057
CD151	NM_139029	1545	23.0641	23.7642	27.5185	22.4904	32.1388	7.86572	1.03031	0.863539	1.42893	4.08541
CD163L1	NM_001297650	4644	0.261545	0	0	0.204962	0	0	0	0	0	0
CD164	NM_001142403	2424	22.3826	8.36035	7.21986	13.0138	8.19785	3.61137	0.373504	1.1578	0.629885	2.26938
CD24	NM_001291739	2374	0.852821	1.20508	0.426293	1.20298	0	0	1.4114	2.82028	0	0
CD274	NM_014143	3634	0.439386	0.388067	0	0.258246	0	0	0.881198	388.067	0	0
CD276	NM_001024736	3292	6.19126	14.8614	6.84583	7.55767	28.3888	3.57323	2.4	2.17055	3.7558	7.94263
CD2AP	NM_012120	5409	7.03704	6.69976	3.18145	5.63199	2.54999	1.49776	0.951935	2.10522	0.452688	1.70139
CD2BP2	NM_001243646	3498	5.20809	15.3321	6.8058	4.73069	12.9018	3.55233	2.94333	2.25246	2.72669	3.63092
CD320	NM_016579	1253	5.17892	8.38546	1.6183	7.60986	4.4102	0	1.61884	5.17846	0.579461	4410.2
CD33	NM_001772	1462	0.828566	0.325248	0	0.324668	0	0	0.39207	325.248	0	0
CD40	NM_001322421	1691	2.71434	1.74336	2.46742	4.06091	3.36205	0	0.64204	0.706264	0.827702	3362.05
CD44	NM_000610	5431	32.6375	25.4552	47.8595	18.8504	8.66263	21.2013	0.779914	0.531864	0.459522	0.408571
CD46	NM_172359	3272	10.43	4.33473	6.13504	5.19265	0.835882	1.22753	0.415562	0.706438	0.160943	0.680391
CD47	NM_001777	5346	5.45361	2.58657	5.6806	3.91763	6.7081	2.27316	0.474199	0.455254	1.71185	2.94971
CD55	NM_001300903	2705	2.3623	2.78174	0.347379	5.88053	8.51993	1.39013	1.17705	7.98479	1.44859	6.12447
CD58	NM_001144822	1395	2.03189	1.02542	2.17692	0.682402	0	5.80763	0.504413	0.470825	0	0
CD59	NM_000611	7563	4.98327	4.00667	3.75068	3.40128	1.09508	3.2162	0.803864	1.06797	0.321867	0.340384
CD63	NM_001780	1032	23.1154	24.7893	21.6697	12.6156	14.06	4.12927	1.07237	1.1439	1.11441	3.40413
CD68	NM_001251	1705	0.654457	1.28449	0.545355	2.30815	1.48628	2.18255	1.95969	2.35102	0.643647	0.680671
CD81	NM_004356	1482	34.353	48.4154	54.0971	46.1053	88.4515	43.2958	1.40931	0.894956	1.91843	2.04291
CD82	NM_002231	2212	0.957812	0.281917	2.99316	1.1259	0	2.39554	0.294028	0.0941557	0	0
CD83	NM_004233	2328	0.653863	1.92502	3.26936	1.3451	0	0	2.93957	0.588625	0	0
CD9	NM_001769	1225	24.6534	12.338	14.6374	15.2145	2.09938	3.08275	0.500438	0.842855	0.137977	0.680788
CD99	NM_002414	1129	12.2327	8.86436	6.27291	11.9829	10.6839	9.41326	0.724587	1.41289	0.891521	1.13486
CD99L2	NM_001242614	3745	1.29746	3.69239	2.70301	0.635469	1.47317	1.08162	2.84366	1.36553	2.31461	1.36075
CDA	NM_001785	809	2.9557	2.48604	1.05552	6.94884	5.75301	4.22403	0.840817	2.35304	0.827791	1.36165
CDADC1	NM_030911	3386	0.595261	0.280376	0.595195	0.699774	1.62218	0	0.470224	0.470277	2.31484	1622.18
CDAN1	NM_138477	4657	2.52157	5.42659	3.04312	1.94195	0.592306	0.869808	2.15122	1.78265	0.304849	0.68018
CDC123	NM_006023	1321	10.4633	5.23641	13.0786	6.45731	3.56405	2.61683	0.500406	0.40035	0.551854	1.36145
CDC14A	NM_033312	2446	0.829329	1.08516	0.230279	0.32496	0	0	1.3069	4.69198	0	0
CDC14B	NM_033331	5602	1.52008	4.60287	2.3524	2.46757	9.36948	2.89655	3.02605	1.95584	3.79551	3.23359
CDC14C	NM_152627	2908	0	0	0	0	0	0	0	0	0	0
CDC16	NM_001078645	2331	5.09674	8.27813	4.39353	4.75171	3.59183	1.75817	1.62388	1.88374	0.755744	2.04178
CDC20	NM_001255	1648	4.11221	3.41809	0.604655	1.13736	0	0	0.831003	5.64363	0	0
CDC23	NM_004661	3133	2.43854	1.81361	3.85013	1.9613	0	2.56789	0.743421	0.470929	0	0
CDC25A	NM_001789	3844	1.52967	1.80128	2.18511	1.28437	0.744337	0	1.1768	0.823966	0.579085	744.337
CDC25B	NM_021873	3696	22.3502	45.5411	44.3699	15.712	42.5431	47.1286	2.03753	1.02637	2.70751	0.902683
CDC25C	NM_001287583	2265	0.709412	1.25313	0.88662	0.833934	0	0	1.76395	1.41178	0	0
CDC26	NM_139286	871	0.46593	0	0	1.09546	0	0	0	0	0	0
CDC27	NM_001114091	5848	5.1148	3.96144	5.14897	2.17896	0	0	0.774353	0.769216	0	0
CDC34	NM_004359	1418	14.8521	20.1291	11.2087	20.4234	5.72712	35.0421	1.35521	1.79569	0.280406	0.163431
CDC37	NM_007065	1618	15.7514	23.0661	16.3565	27.4887	26.4137	17.7767	1.46429	1.41013	0.960857	1.48577
CDC37L1	NM_017913	3499	2.07362	1.08516	1.15186	1.21875	0.784786	1.15243	0.523063	0.941276	0.6434	0.680393
CDC40	NM_015891	3857	1.57682	1.48537	2.10227	0.988531	2.14839	1.05158	0.941407	0.706218	2.17112	2.04108
CDC42	NM_044472	1434	0.802869	1.57575	4.0143	1.25838	1.82323	5.35473	1.9602	0.392435	1.44772	0.340426
CDC42BPA	NM_001366019	10912	5.20326	8.48717	4.04684	4.34945	6.56426	0.385551	1.63081	2.09672	1.50887	16.9816
CDC42BPB	NM_006035	6844	9.48729	25.1187	9.36598	8.52401	24.7	3.62709	2.64733	2.68162	2.89736	6.808
CDC42BPG	NM_017525	6161	4.26325	11.1025	2.66436	7.42088	5.5853	3.28071	2.60361	4.16547	0.752545	1.70195
CDC42EP1	NM_152243	2146	11.2377	19.8494	21.5381	23.1173	42.106	22.484	1.76617	0.921554	1.82133	1.87263
CDC42EP2	NM_006779	1962	2.20176	7.07105	1.50108	6.11761	5.45444	0	3.21008	4.7075	0.891451	5454.44
CDC42EP3	NM_001270438	5014	3.47183	2.75327	2.56825	2.8318	2.41345	1.41761	0.792803	1.07162	0.851969	1.70128
CDC42EP4	NM_012121	3098	8.81418	21.681	9.4667	7.06088	8.89575	9.14413	2.45951	2.29	1.25969	0.972731
CDC42SE1	NM_001038707	3183	11.5618	11.2674	8.30561	8.12328	9.95876	10.6357	0.974446	1.35643	1.2258	0.936267
CDC42SE2	NM_020240	3595	6.0917	4.95604	6.36832	3.25486	1.50902	1.10799	0.813439	0.778111	0.463479	1.36072
CDC45	NM_001178010	2073	3.12531	3.91031	14.6496	0	0	0	1.25077	0.266905	0	0
CDC5L	NM_001253	6241	2.83298	2.29813	0.629459	0.887948	0.857745	1.25958	0.810918	3.64516	0.964899	0.680436
CDC6	NM_001254	4564	6.36639	8.90243	4.31034	2.65049	3.6142	1.32679	1.39813	2.06488	1.36308	2.72196
CDC7	NM_003503	3215	3.8996	1.48129	0.314384	0.887218	0.856926	0	0.37976	4.69679	0.96477	856.926
CDC73	NM_024529	5866	5.11362	5.37928	4.4316	3.20588	0.92894	2.72827	1.05175	1.21357	0.289671	0.340362
CDCA2	NM_152562	3486	4.05556	5.27847	4.26893	1.12911	0.727073	2.13534	1.30122	1.2362	0.643363	0.340336
CDCA3	NM_031299	1808	1.79164	1.31858	0	0.263136	0	0	0.735552	1318.58	0	0
CDCA4	NM_017955	2448	4.09763	12.0011	2.62652	3.95223	11.4523	12.6128	2.92807	4.56746	2.89695	0.907914
CDCA5	NM_080668	2475	5.1874	7.21899	7.07346	2.21735	0	9.4352	1.39137	1.02043	0	0
CDCA7	NM_031942	2774	5.76409	4.75117	2.52165	2.54085	0.981675	0	0.824128	1.88341	0.386205	981.675
CDCA7L	NM_018719	2883	8.70291	5.73897	3.65504	3.27369	0	0	0.659356	1.56972	0	0
CDCA8	NM_018101	2274	3.05094	5.18937	7.62712	0.464813	1.15469	0	1.70035	0.680294	2.47886	1154.69
CDCP1	NM_022842	5963	18.5958	31.2596	15.8328	21.3842	28.4579	13.4804	1.68091	1.97423	1.33073	2.1109
CDH1	NM_004360	4810	8.57264	7.71946	4.41222	6.61928	2.29022	9.24851	0.900371	1.74917	0.34594	0.247604
CDH15	NM_004933	2866	1.69954	1.66776	2.12443	1.33189	0.964853	11.3351	0.980724	0.784669	0.723883	0.0851136
CDH24	NM_022478	3553	6.0403	11.5416	11.1115	4.95689	3.10562	2.28022	1.91044	1.03861	0.626401	1.36139
CDH3	NM_001793	4452	9.19055	16.1046	10.1202	8.8743	2.23603	5.47261	1.7521	1.59118	0.251939	0.408512
CDIP1	NM_013399	2705	2.65913	3.47919	4.43171	3.47311	2.01281	1.47776	1.3079	0.784889	0.579375	1.36115
CDIPT	NM_006319	1843	9.98519	12.0082	9.02875	12.7365	17.3677	6.37592	1.20248	1.32985	1.36351	2.72353
CDK1	NM_001320918	1925	9.2556	3.22011	8.41383	1.48356	0	0	0.347872	0.382671	0	0
CDK10	NM_052988	1767	12.3867	28.6415	16.3272	14.031	12.274	6.75891	2.31209	1.75411	0.874712	1.8157
CDK11A	NM_001313896	2993	0.633425	0.447533	0.633382	0.446784	0	1.26747	0.705415	0.705462	0	0
CDK11B	NM_001787	3031	0.388926	0.305305	0.324075	0.762037	0	1.2971	0.782982	0.939184	0	0
CDK12	NM_016507	8287	4.93756	7.71393	4.52182	3.16063	4.99557	2.44524	1.56198	1.70556	1.58006	2.04215
CDK13	NM_003718	9525	3.30909	6.1526	2.9026	3.34391	5.14137	2.32307	1.85874	2.11896	1.53707	2.21223
CDK14	NM_001287135	5171	1.81547	1.30126	1.18393	0.649483	1.07543	1.57924	0.71637	1.09818	1.65327	0.680548
CDK16	NM_001170460	3018	8.98956	17.5374	9.39159	10.094	23.7651	18.7913	1.95064	1.86715	2.35415	1.26462
CDK17	NM_002595	4036	2.90269	2.62056	2.17692	1.93356	6.59154	6.77559	0.902493	1.20324	3.40726	0.972693
CDK18	NM_212503	3075	4.82061	9.56045	5.7084	7.00869	6.91369	10.1525	1.98283	1.67451	0.986304	0.680915
CDK19	NM_015076	6399	2.26901	2.90094	3.40342	2.05757	0.883262	2.5942	1.27794	0.85211	0.429065	0.340345
CDK2	NM_001798	2240	13.3745	14.0913	8.7987	4.13726	3.59656	0	1.05352	1.60134	0.869098	3596.56
CDK20	NM_001039803	2393	0.676846	1.19548	0	0.795613	1.15273	0	1.76364	1195.48	1.44704	1152.73
CDK2AP1	NM_004642	1346	13.1182	12.2413	4.33123	5.2371	5.05851	2.47604	0.933081	2.82564	0.965715	2.04216
CDK2AP2	NM_005851	909	3.82523	3.21739	10.2458	2.24823	3.72269	13.6668	0.840879	0.31399	1.6551	0.272369
CDK4	NM_000075	1865	16.3834	16.4341	9.10144	7.84606	8.26747	4.04676	1.00303	1.80546	1.05358	2.04248
CDK5	NM_004935	1122	1.35768	4.39655	0.848432	0.797949	2.31227	5.09329	3.23591	5.17587	2.89414	0.453895
CDK5R1	NM_003885	3948	1.57597	3.58797	0.787978	1.60553	6.44191	3.67872	2.27523	4.54761	4.00982	1.75065
CDK5RAP1	NM_001365728	2172	3.47311	3.36805	7.1503	2.64173	0	0	0.969473	0.470971	0	0
CDK5RAP3	NM_001278197	1995	3.45055	8.84342	6.59629	6.68059	13.8274	4.06088	2.56216	1.34046	2.06948	3.40419
CDK6	NM_001145306	11663	6.56628	5.08684	3.88774	3.20931	5.88583	0.69143	0.774574	1.30809	1.83341	8.50025
CDK7	NM_001799	1426	1.6015	0.628558	4.67099	1.56882	0	0	0.392236	0.134538	0	0
CDK8	NM_001260	3063	2.36035	3.55144	4.91719	3.08274	0.89328	3.93532	1.50398	0.722102	0.289674	0.226933
CDK9	NM_001261	2476	7.53511	15.2384	8.19001	5.58411	8.92744	1.63869	2.02205	1.86038	1.59844	5.44457
CDKAL1	NM_017774	3271	2.22814	2.62392	0.928384	1.45517	0	0	1.1771	2.82329	0	0
CDKL1	NM_004196	5401	0.753087	0.886816	0	0.59014	0	0	1.17601	886.816	0	0
CDKL3	NM_001113575	2222	0.190477	0.224356	0	0.22394	0	0	1.17171	224.356	0	0
CDKL5	NM_003159	3431	0.117967	0.694822	0	0.693643	0	0	5.84048	694.822	0	0
CDKN1A	NM_001291549	2378	24.8811	37.552	24.0917	36.0448	35.8102	38.563	1.5092	1.55865	0.993464	0.928592
CDKN1B	NM_004064	2522	4.65617	4.34851	3.21098	3.01975	3.28141	3.21239	0.933724	1.35384	1.08629	1.02117
CDKN1C	NM_000076	1930	2.30786	2.71765	3.14695	2.95953	2.85858	0	1.17705	0.863307	0.965563	2858.58
CDKN2A	NM_001195132	1451	2.79066	4.9293	1.39529	2.29633	3.80227	2.79175	1.76572	3.53029	1.65508	1.36148
CDKN2AIP	NM_017632	3542	1.24107	0.531383	0.564045	0.397879	0	0	0.427821	0.940426	0	0
CDKN2AIPNL	NM_080656	1228	1.29161	2.28145	2.01805	1.32853	0	0	1.76499	1.12996	0	0
CDKN2B	NM_004936	3853	1.67799	1.48193	2.09743	2.4656	5.00131	0	0.882627	0.706207	2.02761	5001.31
CDKN2D	NM_079421	1147	3.18281	1.24932	2.65224	0.831379	0	0	0.392398	0.470865	0	0
CDKN3	NM_005192	839	6.81697	1.60548	2.27221	2.13684	0	0	0.235478	0.706259	0	0
CDON	NM_001243597	8116	1.89586	2.11502	0.748175	0.996925	2.03933	0	1.11501	2.82313	2.04357	2039.33
CDPF1	NM_207327	1489	1.62838	2.87628	0.678376	0.797511	3.69774	0	1.76526	4.23371	4.6308	3697.74
CDR2	NM_001802	2704	2.69755	2.47054	1.87315	2.29012	1.02093	1.49915	0.915508	1.31822	0.445601	0.68055
CDR2L	NM_014603	3533	4.46993	9.58238	4.87081	7.00585	10.9312	0	2.14326	1.9669	1.56008	10931.2
CDRT1	NM_006382	7536	0	0	0	0	0	0	0	0	0	0
CDRT4	NM_001204477	2508	4.21458	3.05414	5.26803	4.00157	9.93879	16.2163	0.724489	0.579639	2.4831	0.61285
CDS1	NM_001263	4309	3.65833	2.942	2.67682	3.77595	1.21574	1.7853	0.803974	1.09866	0.321883	0.680589
CDS2	NM_003818	9076	4.03928	6.95575	6.18892	3.11442	2.36708	3.04149	1.7216	1.12372	0.759795	0.778008
CDT1	NM_030928	2664	6.20644	14.6167	12.488	8.00737	3.09372	16.6577	2.35471	1.17037	0.38631	0.185711
CDV3	NM_017548	3351	8.8944	11.5761	7.46053	11.8999	3.58774	9.36612	1.30136	1.55144	0.301468	0.383014
CDX2	NM_001265	3448	1.50355	4.22205	4.33711	1.76743	3.93968	2.31407	2.8062	0.973248	2.22778	1.70176
CDYL	NM_001368125	3437	1.9889	3.44429	2.33971	2.20049	1.59408	10.5338	1.73089	1.47147	0.724091	0.151315
CEBPA	NM_001287424	2601	2.77031	3.26218	1.92368	4.52295	7.33941	0	1.17712	1.69492	1.62234	7339.41
CEBPB	NM_005194	1839	11.3281	34.1399	6.23979	29.0021	69.3242	26.8905	3.01347	5.47045	2.39023	2.57793
CEBPD	NM_005195	1252	0.647333	1.52462	0.809091	0.760942	2.2051	3.23807	2.3516	1.88204	2.89405	0.680781
CEBPG	NM_001252296	3633	7.35617	4.9874	2.22907	8.38525	3.79653	3.34495	0.677897	2.23644	0.452709	1.13467
CEBPZ	NM_005760	3345	5.35354	3.29535	4.86677	2.00239	0	0	0.615432	0.676973	0	0
CEBPZOS	NM_001322376	3148	5.89469	1.69984	2.40581	1.8383	1.63907	0	0.28832	0.706264	0.891133	1639.07
CECR2	NM_001290047	10030	1.7991	2.77766	1.89899	1.87991	2.17895	1.19985	1.54306	1.46193	1.15846	1.81451
CELF1	NM_001330272	8084	15.5761	22.2574	26.751	8.49364	10.2194	8.50378	1.42886	0.831992	1.20304	1.20161
CELSR1	NM_014246	11839	3.91097	11.4925	3.6442	5.60039	19.1349	2.48974	2.93779	3.15279	3.41611	7.68242
CELSR2	NM_001408	11015	2.88132	13.8433	2.59306	3.61281	13.8714	8.07096	4.80284	5.33655	3.83844	1.71847
CELSR3	NM_001407	11933	1.28635	8.84931	1.18474	2.06918	23.5224	8.80475	6.87403	7.46314	11.3625	2.67125
CEMIP	NM_001293304	7293	1.23539	1.65307	3.93066	0.990137	4.59058	0	1.33702	0.420451	4.63163	4590.58
CEMIP2	NM_013390	6152	2.85554	4.16667	1.2415	2.55399	1.26866	1.242	1.45864	3.35346	0.496542	1.02064
CENPA	NM_001809	1387	3.68377	3.67046	2.83349	2.33166	0	0	0.996116	1.29493	0	0
CENPB	NM_001810	2890	7.34294	24.401	17.6438	9.52546	49.5379	18.5426	3.3226	1.3829	5.20003	2.67142
CENPBD1	NM_145039	3058	1.19171	2.33892	1.3241	1.55655	0.902037	2.6493	1.96101	1.76508	0.579137	0.340353
CENPC	NM_001812	6823	0.785908	0.569455	0.302154	0.284231	0.823659	1.20954	0.723662	1.87843	2.88769	0.680409
CENPE	NM_001813	8541	1.8337	1.82712	0.940151	0.773788	1.28126	0	0.995866	1.94136	1.65369	1281.26
CENPF	NM_016343	10290	6.33196	5.9742	4.96507	1.34064	0.267896	0	0.943352	1.203	0.199677	267.896
CENPH	NM_022909	1354	1.45758	1.37315	0	0.685322	0	0	0.941427	1373.15	0	0
CENPI	NM_006733	3247	1.62117	1.46851	0.62346	0.879554	0	0	0.905273	2.35165	0	0
CENPK	NM_001349367	1649	3.19231	0.867418	6.75261	0.288537	0	2.45652	0.271636	0.128438	0	0
CENPL	NM_001127181	2674	0.908539	1.42654	1.89276	0.177955	0	0	1.56842	0.753283	0	0
CENPM	NM_024053	938	2.51504	13.3274	5.23953	2.95647	0	0	5.29699	2.54315	0	0
CENPN	NM_001100625	2262	3.5803	1.05397	0.447405	2.10429	13.4148	0	0.294299	2.35049	6.37194	13414.8
CENPO	NM_024322	4435	5.66079	11.289	9.12993	4.18573	1.86588	2.74011	1.9939	1.23635	0.445666	0.680703
CENPP	NM_001012267	8291	1.30849	1.96109	3.86594	0.83897	0	0	1.4976	0.507144	0	0
CENPQ	NM_018132	1741	1.17161	0.275935	0	0	0	0	0.235317	275.935	0	0
CENPS-CORT	NM_198544	1138	0.920921	0.723014	0	0.360873	0	0	0.784248	723.014	0	0
CENPT	NM_025082	2580	5.69836	6.91351	3.88509	4.87156	10.5872	1.72743	1.21303	1.77904	2.17283	6.12533
CENPU	NM_024629	2493	1.50855	0.186918	0.396758	0.559995	0	0	0.123823	0.469928	0	0
CENPV	NM_181716	1131	6.26182	11.0604	3.47864	3.68026	68.7275	0	1.76604	3.17861	18.6696	68727.5
CENPW	NM_001286524	1180	3.43147	0.404021	0.857777	0.403354	0	6.86585	0.117706	0.470461	0	0
CENPX	NM_001330536	896	13.8437	13.7547	16.2225	6.1025	14.736	0	0.993494	0.847822	2.41435	14736
CEP104	NM_014704	6431	1.81835	5.53764	2.50792	3.53785	4.27152	0.627195	3.04375	2.20718	1.20704	6.79968
CEP112	NM_001353129	3450	0.913712	1.47957	0.571082	1.34269	0.778044	0	1.61752	2.58629	0.579036	778.044
CEP120	NM_153223	4711	3.09436	3.13762	0.644573	1.91969	2.92776	0	1.01365	4.86022	1.52433	2927.76
CEP126	NM_020802	7048	0.344656	0.47364	0.430907	0.270143	0	0	1.37026	1.09662	0	0
CEP128	NR_157142	5079	0.908454	1.92565	0.681261	0.640724	0	0	2.11737	2.82246	0	0
CEP131	NM_001319228	3639	4.30778	8.19419	3.31355	4.9339	7.52477	0	1.90174	2.47219	1.52481	7524.77
CEP135	NM_025009	5596	1.12972	0.748214	1.2355	0.331968	0	0	0.661717	0.605107	0	0
CEP152	NM_001194998	5560	2.44236	3.21431	1.43659	0.422186	0.489294	0	1.31553	2.23591	1.15622	489.294
CEP162	NM_014895	5155	0.54972	0.554861	0.588849	0.369267	0.534972	0	1.00752	0.940682	1.44483	534.972
CEP164	NM_014956	5629	2.80601	5.76118	0.539586	2.791	1.4704	3.59884	2.05242	10.6573	0.526649	0.408463
CEP170	NM_014812	7059	0.507231	0.53093	0.563583	0.264961	0	0	1.04466	0.940392	0	0
CEP170B	NM_001112726	6727	5.13338	25.9571	6.49188	8.30598	38.2622	9.66646	5.05555	3.99778	4.60603	3.95783
CEP19	NM_032898	2158	0.367724	0.216469	0.229702	0	0	0	0.587077	0.938306	0	0
CEP192	NM_032142	7960	3.32529	5.70915	2.41135	1.31291	2.42102	0	1.71637	2.36663	1.84261	2421.02
CEP250	NM_007186	15434	2.28598	4.12388	2.43189	1.25787	0	0.973153	1.8032	1.69506	0	0
CEP290	NM_025114	7824	0.814403	1.49851	0.763404	0.478682	0	0	1.83776	1.96037	0	0
CEP295	NM_033395	8014	2.16445	3.02313	2.01344	0.591673	0.342934	0	1.39608	1.50073	0.578623	342.934
CEP350	NM_014810	13414	2.73842	2.94119	2.25687	1.73327	0.204954	0.301034	1.07365	1.30264	0.118179	0.678579
CEP41	NM_018718	6292	1.06128	0.661645	1.24854	0.146714	0	0	0.622856	0.529513	0	0
CEP44	NM_001040157	4298	1.42858	0.630824	0.446367	0.314815	0	0	0.441267	1.41008	0	0
CEP55	NM_018131	2658	7.06096	3.07281	4.98849	1.44349	0	0	0.435122	0.615857	0	0
CEP57	NM_014679	3141	3.18536	4.35114	1.91111	1.49772	0	0	1.36555	2.27557	0	0
CEP57L1	NM_001350657	6736	1.47174	0.288807	1.07306	0.720869	0	0	0.196101	0.268893	0	0
CEP63	NM_025180	6086	0.839506	0.741416	0.174786	0.411164	0	0	0.882107	4.21772	0	0
CEP68	NM_015147	5803	3.66104	2.7656	1.89945	2.3548	0.941163	1.38203	0.755208	1.45523	0.39951	0.680508
CEP70	NM_001320599	2321	3.33275	3.13953	1.24969	1.95881	0	0	0.94174	2.51024	0	0
CEP72	NM_018140	2364	2.68389	5.33314	2.09662	2.36611	0	0	1.98635	2.54247	0	0
CEP76	NM_024899	2895	1.51143	0.485333	0	0.969115	0.93606	0	0.320896	485.333	0.964896	936.06
CEP78	NM_001098802	2758	1.78239	1.12096	0.708719	1.33327	0.55192	1.62097	0.628556	1.57945	0.413649	0.340277
CEP83	NM_001368038	2995	0.878856	1.62633	0.627729	1.91874	0	1.25605	1.8484	2.58669	0	0
CEP85	NM_022778	3937	4.67304	5.98127	3.80941	2.03005	2.76823	1.01621	1.27968	1.56972	1.36295	2.72141
CEP85L	NM_001178035	7127	0.795406	0.53519	0.284041	0.200363	0	0.568359	0.672006	1.87759	0	0
CEP89	NM_032816	5673	1.51601	1.96372	8.3378	1.60378	2.06554	0	1.29447	0.235492	1.28712	2065.54
CEP95	NM_138363	2752	7.28875	6.83446	9.11055	5.07725	3.67808	4.05085	0.937544	0.750088	0.724281	0.907755
CEP97	NM_024548	7672	1.94751	1.23962	0.789478	0.680578	0	0	0.636189	1.56819	0	0
CERCAM	NM_016174	2307	1.35513	5.67425	1.12936	8.49678	7.18108	0	4.18414	5.01987	0.845053	7181.08
CERK	NM_022766	4442	7.01457	9.86911	7.74295	7.49599	4.34417	2.73395	1.40674	1.27443	0.579455	1.58839
CERKL	NM_001030311	3288	0.12314	0.289985	0	0.434303	0	0	2.33595	289.985	0	0
CERS2	NM_022075	2323	13.2605	25.5172	27.8945	15.0175	24.2367	19.4131	1.92415	0.91474	1.61379	1.24841
CERS4	NM_024552	1779	3.56767	6.03911	1.67217	5.24221	3.03808	4.46125	1.69226	3.60937	0.579431	0.680842
CERS5	NM_001331070	2630	4.20898	3.58896	6.89371	2.72968	1.97746	1.45187	0.85249	0.520539	0.724164	1.36107
CERS6	NM_001256126	6828	8.15641	4.31515	4.58043	3.33493	1.61059	1.18254	0.528985	0.94188	0.4828	1.36082
CES3	NM_024922	3858	0.935592	0.979278	1.29941	0.488828	0	0	1.04558	0.753051	0	0
CETN2	NM_004344	1413	2.62453	3.9735	1.87453	2.64443	5.10848	7.50156	1.51341	2.11859	1.93106	0.680898
CETN3	NM_001297765	1430	3.96431	0.333406	7.78679	1.33145	0	2.83266	0.0840807	0.0428114	0	0
CFAP206	NM_001031743	2207	0	0.2152	0	0	0	0	215.2	215.2	0	0
CFAP298	NM_021254	3514	3.63704	2.97418	3.53586	3.56281	0	8.08556	0.817524	0.84091	0	0
CFAP36	NM_001282761	1383	4.39182	4.48203	1.46382	4.47426	5.98386	2.92894	1.02031	3.05979	1.3371	2.04232
CFAP43	NM_025145	5367	0.602046	1.32936	0.188053	0.707731	11.7931	0.752828	2.20442	7.03168	16.6398	15.6443
CFAP44	NM_001164496	10238	1.18399	1.25485	0.986645	1.02072	4.30227	1.18455	1.05895	1.27055	4.21081	3.62893
CFAP45	NM_012337	1844	0	0.265601	0.563929	0	0	0	265.601	0.470149	0	0
CFAP46	NM_001200049	8263	0.342366	0.345553	0.122177	0.459996	0	0	1.00637	2.80534	0	0
CFAP57	NM_001195831	4165	0.291652	0.114399	0.486054	0.342844	0	0	0.390904	0.234879	0	0
CFAP69	NM_001039706	3902	0.103719	0.122194	0	0.12197	0	0	1.16688	122.194	0	0
CFAP73	NM_001144872	1514	1.33724	6.61382	0.66857	1.88633	1.82203	0	4.94218	9.87771	0.9654	1822.03
CFAP97	NM_020827	4851	5.64018	3.22311	2.28087	2.4375	0	0.82973	0.571353	1.41249	0	0
CFD	NM_001317335	1212	7.073	13.9508	10.6091	9.14575	9.63693	3.53786	1.97213	1.31486	1.05359	2.72317
CFDP1	NM_006324	1293	2.53277	2.6096	3.16587	7.0711	0	3.16719	1.02993	0.824029	0	0
CFL1	NM_005507	1245	41.3952	71.6949	31.8102	17.7978	39.5023	22.5585	1.73192	2.25376	2.21938	1.75103
CFL2	NM_021914	3125	6.56908	2.04331	2.47873	1.16554	4.22188	9.91946	0.311003	0.824007	3.61916	0.425573
CFLAR	NM_001127183	14480	0.417336	0.312647	0.379337	0.401383	0	0	0.74736	0.822027	0	0
CGGBP1	NM_001195308	4520	6.36062	3.5867	4.03115	2.21144	0	1.79236	0.563803	0.889525	0	0
CGN	NM_020770	5100	3.25464	4.95422	4.76271	3.35924	0.540769	1.58823	1.52173	1.03999	0.160932	0.34027
CGNL1	NM_032866	7214	0.840778	1.18804	0.280234	0.856561	0	0	1.41135	4.22439	0	0
CGREF1	NM_001166239	2002	0.839167	1.23527	0.524473	1.47977	0	0	1.47027	2.35078	0	0
CGRRF1	NM_006568	1961	0.918207	1.80201	1.53027	1.07926	0	0	1.96039	1.17681	0	0
CHAC1	NM_024111	1520	6.36435	20.9216	1.32583	25.5611	12.6457	13.2641	3.2868	15.7681	0.494706	0.953306
CHAC2	NM_001008708	1309	1.21783	0.717031	4.5667	0.71576	6.22234	0	0.588295	0.156979	8.6812	6222.34
CHADL	NM_138481	2530	0	0.376464	0	0.563717	0	3.19841	376.464	376.464	0	0
CHAF1A	NM_005483	3366	5.81412	12.1239	13.6264	3.84442	0.825109	2.42343	2.08489	0.889673	0.214569	0.340331
CHAF1B	NM_005441	4466	1.95438	4.39365	0.88835	0.835394	0	0	2.24696	4.9403	0	0
CHAMP1	NM_001164144	3796	4.38258	4.20057	4.58619	2.75552	0	1.01953	0.958252	0.915717	0	0
CHCHD1	NM_203298	850	3.8382	1.69486	4.79755	5.07579	3.26843	0	0.441461	0.353202	0.643798	3268.43
CHCHD10	NM_001301339	721	16.0063	15.2109	12.636	28.7183	34.4344	44.9472	0.950243	1.20367	1.199	0.766091
CHCHD2	NM_001320327	966	1.67672	2.96158	0	2.95647	0	0	1.76524	2961.58	0	0
CHCHD3	NM_001317177	1695	1.31392	2.25044	1.19431	2.05925	0	2.38986	1.71147	1.88273	0	0
CHCHD4	NM_144636	1603	0.252301	0.891802	0.631075	1.18692	0	0	3.52072	1.41091	0	0
CHCHD5	NM_001304354	547	1.74788	4.80257	0	1.36977	19.8459	0	2.74609	4802.57	14.4779	19845.9
CHCHD6	NM_001320610	1003	4.01316	4.25315	5.01629	2.83048	8.20182	0	1.05954	0.847697	2.89665	8201.82
CHCHD7	NM_001011668	1985	3.67189	1.44122	1.01987	0.479558	0	0	0.392395	1.41176	0	0
CHD1	NM_001364113	8408	3.32368	4.35694	3.1353	2.17465	0.427171	1.25467	1.31049	1.3892	0.196342	0.340195
CHD1L	NM_004284	2967	5.9114	3.95509	2.35101	3.79026	11.8982	0	0.668949	1.68158	3.13834	11898.2
CHD2	NM_001271	9350	8.73514	13.3414	6.48622	5.26112	3.24052	3.02813	1.52715	2.05657	0.61582	1.06978
CHD3	NM_001005271	7361	4.29489	9.01257	3.85417	3.10683	5.064	11.843	2.09795	2.33779	1.62943	0.427558
CHD4	NM_001273	6491	20.3549	36.2812	27.4532	10.909	24.6565	21.0435	1.78234	1.32151	2.25998	1.17164
CHD5	NM_015557	9850	1.46665	3.01008	1.30945	2.36443	5.70948	0.419191	2.05095	2.29698	2.41372	13.5878
CHD6	NM_032221	10719	2.54566	4.76123	3.36927	1.71633	2.04034	1.12357	1.8696	1.41272	1.18809	1.81434
CHD7	NM_017780	11605	3.7065	8.64707	2.97217	3.28836	4.52613	6.6465	2.33232	2.90837	1.37599	0.680877
CHD8	NM_001170629	8467	4.03453	11.4138	5.04294	2.54479	5.69814	1.47658	2.82832	2.26286	2.23826	3.85639
CHD9	NM_001308319	11465	2.01315	2.86967	0.882928	1.34232	0.240489	1.41325	1.42475	3.24649	0.179025	0.170047
CHDH	NM_018397	7694	0.983339	2.70188	0.546278	1.02751	0	8.74439	2.74486	4.93694	0	0
CHEK1	NM_001330427	2172	1.67782	2.19533	0.46598	0.438244	0	0	1.30766	4.70112	0	0
CHEK2	NM_001005735	1973	1.63025	2.15971	1.52831	1.91633	0	0	1.32396	1.41221	0	0
CHERP	NM_006387	4075	8.1085	13.0414	5.43843	5.46316	8.75739	9.89218	1.60817	2.39758	1.6027	0.885194
CHIC2	NM_012110	1107	5.63382	0.829254	0.880159	3.72515	15.5919	3.52243	0.147166	0.941095	4.18447	4.42522
CHID1	NM_001142676	3335	3.21657	7.57533	4.76502	3.78106	4.8695	11.9178	2.35437	1.58945	1.28753	0.408556
CHKA	NM_001376219	2744	6.16005	5.44037	3.35312	3.67902	12.1836	11.9274	0.883027	1.622	3.31076	1.0214
CHKB	NM_005198	1474	5.22005	5.56148	1.24277	5.55177	1.69338	17.407	1.0652	4.47148	0.30496	0.0972755
CHM	NM_000390	5438	2.08218	0.875667	0.557699	0.611892	0	1.48787	0.42035	1.56733	0	0
CHML	NM_001821	7066	2.80805	1.48455	0.286464	1.34729	2.73276	0	0.52849	5.16431	2.02684	2732.76
CHMP1B	NM_020412	3032	7.01347	2.96059	4.6313	4.97769	2.70447	0	0.422069	0.639118	0.54321	2704.47
CHMP2A	NM_014453	894	6.20924	7.83386	2.21741	5.73484	3.02139	13.3106	1.26144	3.53129	0.526756	0.226974
CHMP2B	NM_014043	2590	6.93375	2.17729	5.39263	3.62245	1.04966	0	0.313968	0.403678	0.289685	1049.66
CHMP3	NM_016079	3138	4.18633	5.15365	2.85414	3.42975	0.864171	0	1.23077	1.80504	0.25189	864.171
CHMP4A	NM_014169	980	3.28483	0.703253	2.98601	2.80822	0	0	0.214026	0.235437	0	0
CHMP4B	NM_176812	1602	6.63819	6.51402	1.84373	4.04609	6.6996	31.974	0.981146	3.53115	1.65541	0.209526
CHMP4C	NM_152284	1850	1.53628	1.80908	2.19457	2.5799	2.99033	2.19556	1.1768	0.823966	1.15864	1.36137
CHMP5	NM_016410	1901	1.95616	1.15169	0.488939	0.919772	1.33261	0	0.58845	2.35069	1.44727	1332.61
CHMP6	NM_024591	1664	2.67677	8.31004	4.25843	3.71865	11.6046	2.43437	3.10335	1.95098	3.1198	4.76501
CHMP7	NM_152272	3410	4.03623	7.68846	3.85798	6.14009	6.46982	9.50068	1.90439	1.99236	1.05353	0.680913
CHN1	NM_001371514	2402	0.48145	0.377914	0.401142	0.943276	4.37347	16.0557	0.783323	0.939754	4.63156	0.272376
CHORDC1	NM_012124	3069	0.658103	0.422695	0	0.421894	0	0	0.641318	422.695	0	0
CHP1	NM_007236	3199	7.46388	7.53345	10.7667	4.5712	6.83657	5.01964	1.00919	0.699635	1.49525	1.36169
CHPF	NM_024536	3028	14.8921	46.232	26.7371	30.2372	94.074	50.111	3.10425	1.72907	3.1111	1.87727
CHPF2	NM_019015	3988	4.26453	7.2935	9.89945	6.0871	9.68406	2.03151	1.70987	0.736684	1.59066	4.76457
CHPT1	NM_020244	1572	6.46027	6.99872	0.645842	5.16397	12.3229	12.9255	1.08318	10.8198	2.38587	0.953308
CHRAC1	NM_017444	2481	5.01312	3.42761	2.8298	2.281	3.30491	0	0.683591	1.21083	1.44825	3304.91
CHRD	NM_003741	3527	1.37769	2.16306	1.72201	3.77872	7.03919	2.29704	1.56892	1.25539	1.86236	3.06313
CHRM4	NM_001366692	2846	0.668535	1.04962	0.557007	2.09575	16.7003	2.22941	1.56769	1.88102	7.96484	7.48752
CHRNA5	NM_000745	3623	1.22936	1.18442	2.23518	0.52547	0.761348	1.11803	0.962655	0.52966	1.44614	0.680365
CHRNA7	NM_001190455	6236	0.235849	0	0.884543	0.138612	0	0	0	0	0	0
CHRNB1	NM_000747	2560	0.498412	0.78257	1.24611	1.75787	0	3.32439	1.56698	0.627506	0	0
CHRNB4	NM_000750	2596	0.307765	0.362414	0.769403	0.361821	0	1.53964	1.17375	0.47042	0	0
CHST11	NM_018413	5734	1.19341	1.73601	1.7549	2.14553	1.91295	0	1.45345	0.988677	0.891182	1912.95
CHST12	NM_001243794	15957	3.03745	2.68257	0.94915	1.78524	3.87982	1.89903	0.882873	2.82331	2.17206	2.04198
CHST14	NM_130468	2175	0.92109	1.51855	1.38156	1.08276	0	3.68592	1.64685	1.09836	0	0
CHST15	NM_015892	4762	8.55246	18.7461	7.83236	8.16219	16.1522	2.54131	2.19163	2.39311	1.97867	6.35336
CHST2	NM_004267	4142	0.39147	3.22718	0.489285	0.805394	5.33441	7.8334	8.22276	6.58227	6.61514	0.680896
CHST3	NM_004273	6932	1.21944	2.94037	3.19379	1.50174	3.16485	0.580887	2.40927	0.920364	2.10605	5.43894
CHST6	NM_021615	8370	1.82318	4.01683	3.5286	2.10852	1.60265	1.17666	2.20199	1.13804	0.759722	1.36088
CHST7	NM_019886	2396	1.30934	0.963596	0.81832	1.15437	3.34504	1.63731	0.73538	1.17609	2.89522	2.04176
CHSY1	NM_014918	4662	3.73779	6.49743	2.2248	3.34756	7.27533	2.67089	1.73784	2.91915	2.17268	2.72291
CHSY3	NM_175856	3857	0.46381	0.682675	1.4494	0.545177	1.5799	0	1.46872	0.470682	2.89266	1579.9
CHTF18	NM_022092	3092	6.68331	11.1105	9.50039	6.93198	16.9621	2.62188	1.66218	1.16936	2.44658	6.46697
CHTF8	NM_001040146	2887	6.92425	11.4151	9.52046	1.79064	10.3777	1.38535	1.64833	1.19888	5.79228	7.4856
CHTOP	NM_001206612	2166	13.5538	13.0985	17.2921	17.3609	11.4622	11.2211	0.966335	0.757437	0.660193	1.02139
CHUK	NM_001278	3599	4.25528	5.27458	3.91924	2.50107	9.15457	2.24049	1.23924	1.34547	3.6588	4.08415
CHURC1	NM_145165	3613	3.69852	0.527847	1.68106	1.58093	3.05402	2.24236	0.14268	0.31381	1.93056	1.36136
CHURC1-FNTB	NM_001202559	2894	2.51852	5.2724	0.699374	1.31575	8.57884	0	2.09262	7.52798	6.51514	8578.84
CIAO1	NM_004804	3957	5.7188	6.02533	6.64659	4.71747	3.41743	1.00368	1.05342	0.906393	0.724267	3.40152
CIAPIN1	NM_020313	2021	1.17526	1.74816	0	0.436273	0	0	1.48621	1748.16	0	0
CIB1	NM_001277764	1097	8.48987	9.12796	8.30492	8.24423	22.6319	25.8487	1.07503	1.09897	2.74485	0.875518
CIB2	NM_001301224	1514	2.03868	2.40056	2.54818	1.79728	0	5.09862	1.17693	0.941698	0	0
CIC	NM_001304815	8227	3.74067	18.373	5.66006	5.0336	12.4063	7.38576	4.91036	3.2455	2.46421	1.67953
CILP2	NM_153221	4199	1.63932	3.17959	2.16965	5.10112	3.28475	5.78832	1.9384	1.46481	0.6438	0.567381
CINP	NM_032630	953	4.54973	4.87056	0	3.8896	2.81769	8.2755	1.07028	4870.56	0.724231	0.340445
CIP2A	NM_020890	4064	3.03813	2.6832	1.1867	0.781234	0.646742	0	0.882885	2.25916	0.826789	646.742
CIPC	NM_033426	4325	4.19083	3.28991	3.72507	1.861	1.26885	0	0.78484	0.882944	0.681443	1268.85
CIR1	NM_004882	1918	1.12912	1.32964	0	0.796416	0	0	1.17654	1329.64	0	0
CIRBP	NM_001300829	3345	44.0585	58.025	75.3602	36.1171	55.2901	14.4984	1.31697	0.769958	1.53081	3.81326
CISD1	NM_018464	2374	1.44062	0.904765	0	0.225764	0	0	0.627603	904.765	0	0
CISD2	NM_001008388	5877	0.824834	0.323616	0.171786	0.161531	0	0	0.391865	1.87293	0	0
CISD3	NM_001136498	2552	6.60546	12.6624	7.29647	3.97259	11.5115	7.68368	1.91666	1.73517	2.897	1.49798
CISH	NM_013324	2211	0.178519	0.630643	0	1.04933	0	14.2887	3.51296	630.643	0	0
CIT	NM_001206999	8736	2.79007	4.92812	1.16247	1.14787	3.80138	0	1.76567	4.23571	3.3088	3801.38
CITED1	NM_001144885	943	0	0	0	0	0	0	0	0	0	0
CITED2	NM_001168389	1780	4.54973	4.82179	8.53047	4.27857	0	15.9303	1.05956	0.565177	0	0
CITED4	NM_133467	1310	0.627234	6.64827	1.56823	5.16185	6.41028	0	10.5825	4.23665	1.24162	6410.28
CIZ1	NM_001257975	3162	6.14691	8.14316	4.80205	3.91391	4.36206	0	1.32454	1.69541	1.11422	4362.06
CKAP2	NM_001098525	3739	5.52323	2.80558	2.97805	1.40035	0	0	0.507867	0.941769	0	0
CKAP2L	NM_152515	4721	1.09919	0.79653	0	0.397515	0	0	0.723996	796.53	0	0
CKAP4	NM_006825	3121	6.00189	6.91051	11.3365	5.80097	14.5379	0	1.1512	0.609527	2.50569	14537.9
CKAP5	NM_001008938	7172	9.4085	9.87174	8.14167	3.04851	9.86085	1.20663	1.04912	1.21235	3.23358	8.16547
CKB	NM_001362531	1492	51.1026	53.308	38.8808	58.7651	83.2493	88.9079	1.04314	1.37103	1.41662	0.936344
CKLF	NM_016951	656	4.55999	4.29575	2.27983	2.14407	0	0	0.941845	1.88342	0	0
CKLF-CMTM1	NM_001204099	781	3.05993	2.4021	0	2.99734	0	0	0.784763	2402.1	0	0
CKMT1A	NM_001321927	1972	0	0.275119	0	0	0	0	275.119	275.119	0	0
CKMT1B	NM_020990	1976	0	0	0	0.240874	0	0	0	0	0	0
CKS1B	NM_001826	779	1.4887	0.584231	0	0	0	0	0.392179	584.231	0	0
CKS2	NM_001827	616	5.25881	5.41844	1.64322	0.772694	4.47818	0	1.03016	3.29545	5.78805	4478.18
CLASP1	NM_015282	8078	4.45365	7.42458	5.62937	2.29407	4.43168	1.00119	1.66671	1.31867	1.93096	4.42201
CLASP2	NM_001365628	7245	2.43727	3.73772	0.283349	0.799482	3.86136	1.13402	1.53294	13.1448	4.8238	3.40203
CLASRP	NR_103529	2233	6.07211	7.68384	5.89057	5.5398	8.64367	1.81327	1.26522	1.30421	1.56	4.76428
CLBA1	NM_174891	2379	2.14248	4.54114	1.60676	2.77034	1.45957	0	2.11858	2.82451	0.526664	1459.57
CLCC1	NM_001048210	4822	3.43376	2.564	1.88423	0.984443	1.71158	0.83776	0.746486	1.36005	1.73687	2.04061
CLCF1	NM_013246	1705	2.63793	4.65953	1.09902	3.61778	0	0	1.76569	4.23587	0	0
CLCN1	NM_000083	3187	0	0.308296	0	0	0	0	308.296	308.296	0	0
CLCN2	NM_004366	3244	0.984611	3.91312	1.53835	2.02546	3.35386	4.92501	3.97025	2.54207	1.65504	0.680847
CLCN3	NM_173872	6709	8.37962	6.45183	3.86732	4.84937	8.78247	5.80347	0.769851	1.66786	1.81068	1.51305
CLCN4	NM_001830	6758	0.775476	0.561931	0.44729	0.280435	0.40638	0.596739	0.723694	1.2535	1.44395	0.679862
CLCN5	NM_001127899	10122	1.24183	1.13202	0.700989	0.847583	0.272873	0.40071	0.910841	1.61259	0.321563	0.679279
CLCN6	NR_046428	5682	2.41616	4.1004	1.77647	1.83779	0.484128	0	1.69638	2.30688	0.263285	484.128
CLCN7	NM_001287	4168	5.07842	14.2168	5.9884	5.51907	13.0553	3.83419	2.7989	2.37366	2.36505	3.40407
CLDN12	NM_012129	3490	4.13766	1.05343	0.838626	2.23472	0.761789	3.35602	0.254534	1.25464	0.340735	0.226924
CLDN15	NM_014343	1224	3.99026	9.17401	5.22523	4.69069	5.17797	1.9009	2.29852	1.75538	1.10365	2.72253
CLDN23	NM_194284	2160	1.03719	2.19841	0.518589	0.975392	9.89242	0	2.11754	4.23106	10.1316	9892.42
CLDN3	NM_001306	1274	2.86054	7.85979	3.17822	7.84606	95.2728	0	2.74669	2.47224	12.1412	95272.8
CLDN4	NM_001305	1831	21.8942	74.7404	30.4074	42.3743	75.3299	22.1238	3.41355	2.45789	1.77768	3.40478
CLDN7	NM_001307	1542	18.745	37.2633	18.6435	40.2785	64.5361	34.278	1.9878	1.99863	1.60221	1.88267
CLDND1	NM_001040182	2228	57.9773	42.3752	29.987	24.1417	6.19064	5.45447	0.73088	1.41307	0.256419	1.13476
CLEC11A	NM_002975	1375	2.87793	1.01663	2.15834	2.7064	0	0	0.353126	0.470803	0	0
CLEC16A	NM_015226	6812	3.17314	6.78116	2.35032	3.24647	6.00472	6.46625	2.13637	2.88398	1.84905	0.928481
CLEC2D	NM_001004419	5358	0	0.0888357	0.18863	0.0886853	0	0	88.8357	0.468468	0	0
CLGN	NM_001130675	2822	1.00429	0.337757	0	0.674665	0.977454	1.4354	0.335981	337.757	1.44665	0.680489
CLHC1	NM_152385	5326	1.04974	0.353167	0.749791	0.440726	0	0.750059	0.336112	0.470394	0	0
CLIC1	NM_001288	1251	5.97008	5.19617	7.13795	4.57689	1.76829	7.79007	0.870222	0.727861	0.386267	0.226964
CLIC3	NM_004669	809	2.49028	4.69198	2.49015	3.51281	0	0	1.88336	1.88346	0	0
CLIC4	NM_013943	4251	8.47792	5.43067	3.19621	6.01162	0	1.82718	0.640492	1.69856	0	0
CLINT1	NM_001195555	4006	7.31674	5.42922	5.01133	6.48016	0.682718	4.0107	0.741927	1.08317	0.105339	0.170182
CLIP1	NM_001247997	5913	3.0132	4.51585	1.88307	3.05895	0.466423	2.74025	1.49819	2.39686	0.152428	0.17015
CLIP2	NM_003388	5623	4.58578	10.3714	5.09509	7.273	8.9258	10.9226	2.26115	2.03517	1.22708	0.817108
CLIP4	NM_001287527	4295	1.88823	1.77871	0.944074	1.99765	2.57267	0.944427	0.941499	1.88208	1.28721	2.72117
CLK1	NM_001162407	2213	4.75743	2.80105	7.31885	2.79618	2.49303	1.83043	0.58865	0.382664	0.891266	1.36125
CLK3	NM_001130028	2696	3.60473	3.53729	1.50189	2.11867	3.06959	6.01016	0.981021	2.35366	1.44815	0.510647
CLK4	NM_020666	2504	0.484503	0.760724	1.21127	0.759409	0	3.23164	1.56688	0.62752	0	0
CLMN	NM_024734	12749	2.44533	2.39349	2.93744	3.02391	3.02901	0.953079	0.9784	0.814544	1.00135	3.1748
CLMP	NM_024769	5032	0.82212	0.645419	0.685068	0.966487	0	0	0.784112	0.940751	0	0
CLN3	NM_000086	1877	2.80449	6.85893	0.53924	1.77509	20.5754	2.15812	2.44483	12.6961	11.5846	9.52953
CLN5	NM_006493	5243	3.32622	0.681134	0.723025	1.86998	0	1.44668	0.204716	0.940761	0	0
CLN6	NM_017882	2228	6.32135	16.589	20.7695	7.00614	31.9907	3.61359	2.62386	0.79868	4.56544	8.85043
CLN8	NM_018941	7084	2.93713	4.05716	3.38888	2.32385	2.69351	10.736	1.38087	1.19685	1.15858	0.250863
CLNS1A	NM_001311199	976	5.60355	4.16739	17.6948	3.46683	0	0	0.743574	0.235502	0	0
CLOCK	NM_001267843	10981	5.82634	3.51726	3.31862	2.68749	2.00966	1.47555	0.60358	1.05954	0.747504	1.36105
CLP1	NM_006831	1828	1.75483	1.54982	0.548354	0.515689	0	0	0.882672	2.82117	0	0
CLPB	NM_001258394	3382	3.05128	3.44329	4.13175	3.28785	10.3934	1.27183	1.12811	0.833172	3.16018	8.16554
CLPP	NM_006012	2410	5.27712	6.21406	1.75893	4.13551	9.58672	3.51931	1.17732	3.53085	2.31759	2.72326
CLPTM1	NM_001294	2470	9.69617	10.6928	6.92555	9.95049	9.43639	20.0156	1.10268	1.54374	0.948239	0.471428
CLPX	NM_006660	4694	2.46076	3.19745	1.27276	1.89516	1.7342	0	1.29885	2.51024	0.914584	1734.2
CLSPN	NM_022111	8512	1.95684	2.3042	1.67044	0.560944	0.650271	0	1.17691	1.37857	1.15718	650.271
CLSTN1	NM_001009566	4760	11.9713	19.1607	17.6269	12.7515	15.8357	38.7568	1.60042	1.08695	1.24177	0.408581
CLSTN3	NM_014718	4002	4.55321	11.3189	6.82945	6.06593	8.9609	16.1954	2.48536	1.65712	1.47701	0.553266
CLTA	NM_007096	1168	10.4837	9.64457	15.9706	16.1746	15.623	22.9418	0.919872	0.603858	0.965838	0.680955
CLTC	NM_001288653	8587	23.4839	24.0996	12.9675	12.6939	8.67372	9.43485	1.02618	1.85832	0.683245	0.91923
CLTCL1	NM_007098	5517	1.39525	2.16188	0.550662	1.55371	11.5065	7.34651	1.54835	3.91885	7.40109	1.56605
CLU	NM_001831	2749	4.81382	8.16935	14.1578	9.48663	5.78723	5.66552	1.69671	0.576982	0.609976	1.0213
CLUAP1	NM_001330454	4140	2.59323	0.904765	1.44063	0.903203	0.654303	0.960832	0.34876	0.6276	0.723624	0.680268
CLUH	NM_001366661	5357	9.06911	22.454	13.1768	12.2097	31.6835	27.1402	2.4756	1.70393	2.59474	1.16736
CMAS	NM_018686	1748	4.7347	1.85839	5.07259	4.24047	1.53593	13.5329	0.392421	0.366287	0.362121	0.113487
CMBL	NM_138809	3893	2.40131	2.12073	4.75244	2.70516	1.36323	6.00566	0.882785	0.446145	0.503752	0.226953
CMC1	NM_001331185	6126	2.67456	1.88966	4.01165	2.51516	0	0	0.706268	0.470926	0	0
CMC2	NM_001351973	10167	2.6068	3.58126	5.4307	2.0429	2.95983	0	1.37329	0.659325	1.44813	2959.83
CMC4	NM_001018024	878	3.19468	0	0	1.87765	0	15.9797	0	0	0	0
CMIP	NM_198390	4358	7.71211	11.4885	11.3818	8.95634	12.6598	11.1543	1.48947	1.00928	1.41335	1.13488
CMPK1	NM_016308	2937	10.5034	3.58026	2.93663	4.7112	0.941478	5.53013	0.340836	1.21876	0.199796	0.170214
CMSS1	NM_032359	4302	3.62135	1.93825	6.58394	4.64383	0	0	0.535081	0.294346	0	0
CMTM4	NM_178818	3450	9.84458	9.21807	12.1569	8.22605	10.5043	4.74615	0.936264	0.758196	1.27679	2.21275
CMTM6	NM_017801	3307	14.0751	11.616	9.02218	8.48474	6.55632	4.81385	0.825228	1.28735	0.772629	1.36169
CMTM7	NM_138410	1856	13.7569	13.9104	7.47622	9.14021	8.1494	0	1.01108	1.86037	0.891501	8149.4
CMTM8	NM_178868	1169	4.82468	7.30456	2.58452	8.91225	4.69542	0	1.51369	2.82518	0.526791	4695.42
CMTR1	NM_015050	4034	3.43655	6.7061	5.40013	2.19297	3.34454	1.96451	1.95083	1.24161	1.52442	1.70161
CMTR2	NM_001099642	4924	3.58336	2.94101	2.44308	1.6594	0	0	0.820512	1.20332	0	0
CNBP	NM_001127192	3301	19.5047	16.6269	12.2647	13.7848	13.8581	20.3501	0.852411	1.35556	1.00525	0.680952
CNDP2	NM_001370250	4988	2.79372	2.91372	1.79585	3.31522	1.08752	0.798513	1.04258	1.62157	0.32794	1.36023
CNEP1R1	NM_153261	2169	0.560066	0.219823	1.40002	0.438828	0	5.60281	0.391795	0.156903	0	0
CNFN	NM_032488	533	4.60147	2.70922	1.91711	0.901378	0	0	0.588645	1.41244	0	0
CNIH1	NM_005776	4735	18.4964	9.71736	12.8047	7.35906	5.81558	8.54012	0.525336	0.758831	0.790154	0.680891
CNIH4	NM_014184	4095	3.55198	0.597466	5.7084	0.894663	6.91369	5.07626	0.168159	0.104646	7.71907	1.3617
CNKSR1	NM_001297647	2556	2.69212	5.22137	4.35476	2.60611	3.23648	3.16844	1.93878	1.19873	1.24141	1.02115
CNKSR3	NM_001368116	3049	2.35416	3.06402	0.619422	2.62173	5.06469	8.67683	1.30098	4.9386	1.93108	0.583635
CNN2	NM_001303501	2212	12.2898	11.6026	7.54844	9.15378	2.16528	0	0.944003	1.53688	0.236519	2165.28
CNN3	NM_001839	1991	16.8721	8.12774	7.18952	9.69122	1.30609	3.83599	0.481698	1.13034	0.134756	0.340393
CNNM2	NM_017649	15857	2.41141	5.79282	2.17023	3.62836	5.25692	4.82472	2.40126	2.66799	1.44844	1.08935
CNNM3	NM_017623	4900	3.37711	5.43167	2.26506	3.29209	1.12224	1.6479	1.6079	2.39696	0.340786	0.680598
CNNM4	NM_020184	4782	2.44643	3.07952	1.47616	2.87581	2.29879	0	1.25827	2.08475	0.799074	2298.79
CNOT10	NM_001256742	2764	1.3185	2.24265	3.29612	0.861014	1.99605	1.46558	1.69962	0.680183	2.31557	1.36103
CNOT11	NM_017546	2515	7.55827	9.27898	1.20585	8.31766	0	0	1.2275	7.68861	0	0
CNOT2	NM_001199303	3405	5.42698	3.77624	1.84996	2.75472	0	4.93554	0.6957	2.04015	0	0
CNOT4	NM_001190850	3563	2.84121	2.5427	0.852239	2.1375	1.5484	17.0539	0.89462	2.98005	0.72406	0.0907894
CNOT6L	NM_001365006	9411	0.920921	0.8133	1.03591	0.541236	0	1.38189	0.88218	0.784351	0	0
CNOT7	NM_001322093	6956	3.39288	1.91078	2.21257	2.08086	0	0	0.563009	0.863214	0	0
CNOT8	NM_001301073	2446	3.64654	6.34768	1.98171	2.79559	2.16018	0	1.74026	3.20151	0.772431	2160.18
CNOT9	NM_001271634	3912	9.75045	12.8324	12.331	4.18011	3.12579	4.5902	1.31595	1.04058	0.747598	0.680821
CNP	NM_033133	5172	6.97886	5.47863	6.59087	2.68895	4.22603	3.87863	0.784919	0.831119	1.57104	1.08929
CNPPD1	NM_015680	2019	5.43266	16.4502	8.24573	6.15804	11.8961	1.94098	3.02746	1.99475	1.93148	6.12577
CNPY2	NM_014255	1450	3.79894	5.26297	6.70381	2.10151	4.56714	6.70672	1.38502	0.784955	2.17223	0.680879
CNPY3-GNMT	NM_001318857	970	2.14732	4.33473	0.766865	2.34392	6.2694	0	2.01773	5.64517	2.67361	6269.4
CNPY4	NM_152755	1475	2.20821	1.95022	0.690029	0.32445	1.88037	0	0.882767	2.82219	5.77777	1880.37
CNST	NM_152609	5127	1.70233	2.3691	1.3541	1.0005	1.58135	0.774078	1.39086	1.74829	1.57898	2.04025
CNTD1	NM_173478	3252	3.33631	1.455	0.926653	2.32399	0	0	0.43598	1.56848	0	0
CNTLN	NM_017738	5518	0.581862	1.02778	0.54547	0.256494	0.495468	5.09356	1.76333	1.88075	1.92419	0.0972543
CNTN1	NM_001843	5667	0.429209	0.0842127	0.715295	0.588681	2.43689	9.3041	0.195748	0.117567	4.13256	0.261888
CNTNAP1	NM_003632	5537	1.55909	2.88508	4.45444	0.959991	4.55208	8.91266	1.8493	0.64754	4.73686	0.510686
CNTNAP3	NM_033655	5093	0	0.36468	0	0.273063	0	0	364.68	364.68	0	0
CNTNAP3B	NM_001201380	7652	0.0634357	0.0746945	0	0.149196	0.865242	0	1.15921	74.6945	5.76077	865.242
CNTRL	NM_007018	7433	1.63474	0.962508	0.68103	0.640505	1.11367	0	0.588423	1.41124	1.73603	1113.67
CNTROB	NM_001037144	4062	4.54651	12.3023	6.77107	3.86617	7.9079	0	2.70528	1.81662	2.04488	7907.9
COA1	NM_001350927	1212	4.94248	5.40429	2.64763	3.3199	2.40501	0	1.09322	2.04041	0.724206	2405.01
COA3	NM_001040431	780	2.00459	1.77037	0	1.76721	0	0	0.882719	1770.37	0	0
COA4	NM_016565	817	11.9097	9.93392	0	6.99993	0	0	0.834032	9933.92	0	0
COA5	NM_001008215	1769	0.916596	1.07935	1.14574	3.23252	0	0	1.17629	0.941236	0	0
COA6	NM_001206641	1741	2.22178	0	1.3886	1.95881	3.78406	0	0	0	1.93083	3784.06
COA7	NM_023077	3988	1.91545	4.51113	1.91538	1.8013	0	13.4134	2.3539	2.35399	0	0
COASY	NM_001042532	2219	6.34629	18.2676	14.1024	5.90586	7.20565	17.6355	2.87802	1.29526	1.21988	0.408566
COBL	NM_001287436	5383	2.10627	7.35215	1.50443	3.97916	9.22425	3.01007	3.48895	4.88377	2.31756	3.06345
COBLL1	NM_001278458	9492	0.168851	0.497299	0.211127	0.446784	0	0	2.92785	2.34434	0	0
COCH	NM_001347720	3077	2.63199	1.23971	0.657956	1.70159	0	1.31648	0.470838	1.88133	0	0
COG1	NM_018714	3013	4.00383	4.55764	1.66814	3.13771	0.90922	0	1.13803	2.73053	0.28968	909.22
COG2	NM_007357	2932	3.14643	2.89958	1.02587	1.44729	1.86387	0	0.921253	2.8237	1.28695	1863.87
COG3	NM_031431	4555	2.73121	2.59364	1.98229	2.89983	4.20146	0.881299	0.949282	1.30775	1.44837	4.76195
COG4	NM_015386	2820	3.73075	4.05508	1.79354	3.0361	5.8651	1.4354	1.08664	2.25967	1.93115	4.0832
COG5	NM_006348	4286	3.40204	3.41981	1.45205	2.14582	0.565277	1.66015	1.00493	2.35354	0.263309	0.340292
COG6	NM_020751	3574	2.9172	1.05696	1.12186	1.31889	1.52868	0	0.362198	0.941315	1.15819	1528.68
COG7	NM_153603	2935	1.93013	3.24704	3.10196	1.4586	1.87848	1.37919	1.68142	1.04643	1.28699	1.36103
COG8	NM_032382	4629	4.38198	7.45341	2.84007	2.86165	3.31688	0	1.70053	2.62345	1.15867	3316.88
COIL	NM_004645	2633	1.69165	0.181025	0.384413	1.08466	0	3.07693	0.106948	0.469692	0	0
COL12A1	NM_004370	11725	1.74855	2.55312	2.71016	1.02765	0	0.699668	1.4593	0.941708	0	0
COL17A1	NM_000494	5612	1.08265	1.27488	0.902195	1.10291	2.45857	0	1.17647	1.41153	2.22715	2458.57
COL18A1	NM_130445	5399	5.39984	13.6567	13.6526	16.2296	40.1309	22.0989	2.52862	1.00023	2.47254	1.81588
COL1A1	NM_000088	5914	2.73274	15.366	4.26973	9.47655	43.2846	4.10075	5.62085	3.59797	4.56707	10.5527
COL4A4	NM_000092	9982	1.76204	1.15269	1.17458	1.56502	1.06705	0.391711	0.653808	0.980525	0.681374	2.71713
COL4A5	NM_033380	6518	2.9847	5.56492	1.7099	2.63136	5.08328	0.622004	1.86386	3.25263	1.93107	8.1593
COL6A1	NM_001848	4203	10.0633	18.5088	12.6986	19.3778	22.8521	3.83509	1.83906	1.45744	1.17923	5.95713
COL6A2	NM_001849	3445	7.18257	12.4788	6.47561	10.9345	10.4278	18.8467	1.73713	1.92675	0.953576	0.553269
COL9A3	NM_001853	2497	1.62948	3.45381	3.66623	7.08723	12.211	8.15063	2.11827	0.941802	1.72271	1.49798
COLGALT1	NM_024656	3647	8.19254	12.67	6.28064	8.08941	11.1623	1.09269	1.54634	2.01699	1.37969	10.206
COMMD1	NM_152516	739	2.19176	1.93562	1.36979	3.22048	0	0	0.882735	1.41205	0	0
COMMD10	NR_146219	5389	4.9016	2.24464	0	1.28035	0	0	0.457848	2244.64	0	0
COMMD2	NM_016094	3694	1.42035	0.771964	1.09256	1.41283	0	0	0.543121	0.705922	0	0
COMMD3	NM_012071	925	5.15831	3.03709	2.14923	3.0318	2.92839	0	0.588663	1.41245	0.965575	2928.39
COMMD3-BMI1	NM_001204062	3388	5.25881	4.50352	3.28655	1.96692	4.07104	3.58694	0.856214	1.36987	2.06871	1.13465
COMMD4	NR_104312	3240	4.61096	3.45526	4.19163	0.492696	0	4.19344	0.749194	0.824127	0	0
COMMD5	NM_014066	1430	2.96223	4.85315	0.643881	1.81677	5.26441	18.0382	1.63779	7.52566	2.89608	0.291832
COMMD6	NM_203497	1739	2.09567	1.09676	0	1.09481	1.58627	0	0.523096	1096.76	1.44758	1586.27
COMMD7	NM_053041	1911	1.05941	2.24564	0.529664	1.74356	0	0	2.11771	4.23175	0	0
COMMD8	NM_017845	1459	2.45076	0.320624	1.36148	0.96021	0	0	0.130773	0.235324	0	0
COMMD9	NM_014186	2949	1.36149	0.641249	2.38262	0.480141	0	0	0.470644	0.269023	0	0
COMT	NM_001135161	2297	6.67856	4.96691	8.34784	5.16484	1.19728	7.03274	0.743599	0.594923	0.231768	0.170219
COMTD1	NM_144589	1250	3.01286	4.96691	3.01266	1.77079	28.7352	3.01401	1.64803	1.64813	16.2182	9.53072
COP1	NM_022457	2826	2.17776	3.41927	0.362954	5.12003	4.94542	13.072	1.56936	9.39477	0.965709	0.378294
COPA	NM_001098398	5345	8.93333	11.1928	8.57569	5.04054	3.40805	7.86434	1.25278	1.30502	0.675993	0.433299
COPB1	NM_001144062	3368	5.45318	7.2412	5.511	2.86413	1.58085	13.9284	1.32764	1.31372	0.551754	0.11349
COPB2	NM_004766	3275	6.74234	7.78682	5.8345	4.11522	7.06647	6.48549	1.15474	1.33439	1.71674	1.08941
COPE	NM_001330469	1200	9.96552	14.0818	12.4564	14.4477	6.78894	13.2924	1.41291	1.1304	0.469863	0.510701
COPG1	NM_016128	3078	11.7237	11.4785	10.2085	8.98101	3.58956	5.27111	0.978997	1.12429	0.399639	0.680859
COPG2	NM_012133	3133	2.70552	3.641	2.25445	1.36298	5.26612	0	1.34527	1.61431	3.86085	5266.12
COPRS	NM_018405	867	6.05014	4.57994	1.08033	3.55595	0	0	0.756871	4.23548	0	0
COPS2	NM_001143887	6597	5.32284	1.97324	0.739176	3.0126	4.02908	13.8052	0.370643	2.66591	1.33697	0.291831
COPS3	NM_003653	1814	6.73801	8.19029	1.63006	2.29947	5.92288	10.8718	1.21536	5.02144	2.57464	0.54474
COPS4	NM_001330727	1799	2.1357	1.00584	1.06775	0.502039	4.36483	10.6826	0.470744	0.941135	8.67693	0.408555
COPS5	NM_006837	1295	5.30299	3.52252	1.35964	3.19669	9.26319	13.6026	0.664126	2.58887	2.89684	0.680936
COPS6	NM_006833	1404	7.67233	4.34996	4.97257	5.34448	17.4226	42.6407	0.566893	0.874615	3.25932	0.408582
COPS7A	NM_001164093	2023	7.98637	5.59176	5.39598	4.05967	4.41133	6.47788	0.700075	1.03609	1.08636	0.680879
COPS7B	NM_001308381	2581	5.82193	11.3659	8.80909	3.78201	4.17488	3.0653	1.95192	1.2901	1.10359	1.36153
COPS8	NM_006710	3438	1.61396	2.74521	4.03472	1.47561	0	0	1.69985	0.680226	0	0
COPS9	NM_138336	759	2.134	2.19878	2.66736	0.627074	7.26897	10.6742	1.02987	0.824018	11.5734	0.680924
COPZ1	NM_016057	1889	23.6544	12.7468	15.034	8.95437	6.82813	8.02147	0.538855	0.847811	0.762462	0.851126
COQ10A	NM_144576	1570	1.95854	0.576526	0	1.15108	0	0	0.294215	576.526	0	0
COQ10B	NM_025147	2240	3.25388	1.49008	0.90381	2.54998	0	0	0.4578	1.64685	0	0
COQ2	NM_015697	1861	2.17581	2.30592	1.08783	1.53458	1.48231	2.17667	1.05931	2.11781	0.965307	0.680687
COQ3	NM_017421	1325	2.24069	0.753835	0	0.376274	0	0	0.33628	753.835	0	0
COQ4	NM_016035	1245	1.79842	3.02549	1.28453	2.11414	8.75178	0	1.68137	2.3535	4.13768	8751.78
COQ5	NM_032314	1506	2.95171	0.947914	2.0124	1.89261	0	0	0.321031	0.470802	0	0
COQ6	NM_182476	2109	1.01285	1.78922	0.633036	1.48838	0	0	1.76478	2.82196	0	0
COQ7	NM_016138	2642	2.28258	1.07509	0	1.43101	0	0	0.470792	1075.09	0	0
COQ8A	NM_020247	2866	4.29302	7.01213	4.15436	3.41858	4.71709	5.54141	1.633	1.68749	1.37944	0.85109
COQ8B	NM_024876	2443	4.64099	8.3928	12.0165	4.48134	20.3252	4.97444	1.80802	0.698382	4.53449	4.0851
COQ9	NM_020312	1630	4.31541	3.67	2.99662	2.81815	3.26647	0	0.850244	1.2243	1.15867	3266.47
CORO1A	NM_001193333	1933	1.78468	0.7881	2.78861	0.786708	0	6.69564	0.441344	0.282512	0	0
CORO1B	NM_001018070	1932	8.26819	13.481	7.41992	6.4795	20.2199	6.36256	1.63027	1.81662	3.12011	3.17745
CORO1C	NM_001105237	3925	11.8126	11.784	9.02679	8.12525	4.2169	0	0.99749	1.3053	0.518923	4216.9
CORO2A	NM_052820	5456	1.21987	1.94342	0.717487	1.60254	0.97758	0	1.59184	2.70488	0.609639	977.58
CORO2B	NM_006091	3544	0.680832	0.935404	0.56739	1.06722	2.31939	1.13526	1.3719	1.64571	2.17127	2.04124
CORO6	NM_032854	2397	3.04076	5.96777	4.64538	3.37581	10.3576	1.68985	1.96195	1.28439	3.06727	6.12567
CORO7-PAM16	NM_001201479	3293	1.88179	4.43191	3.87424	3.90361	12.066	1.10737	2.35391	1.14365	3.09018	10.8862
COTL1	NM_021149	1840	27.533	25.0646	21.7931	33.1763	16.3317	26.1627	0.910313	1.15006	0.492256	0.624214
COX10	NM_001303	2898	2.56279	4.44741	2.36036	1.58553	0	0	1.7347	1.88341	0	0
COX11	NM_004375	3150	1.78383	1.71861	0.810706	1.33437	0	3.24458	0.962896	2.11728	0	0
COX14	NM_032901	484	2.72494	5.13407	2.72481	2.56253	3.71274	0	1.88341	1.8835	1.44829	3712.74
COX15	NM_001372024	4276	7.70744	6.50722	4.18067	3.58982	1.48603	1.45478	0.844168	1.55613	0.413841	1.02078
COX16	NM_016468	1669	3.53756	0.833062	5.3061	0.831671	0	0	0.235424	0.156971	0	0
COX17	NM_005694	423	1.91452	1.12722	2.39312	1.12517	6.52142	0	0.588465	0.470827	5.79078	6521.42
COX18	NM_001300729	4429	1.16126	0.210305	0.669839	0.525032	1.21706	0	0.180944	0.313495	2.31366	1217.06
COX19	NM_001031617	4839	2.92525	4.0946	4.34634	3.21158	2.82002	9.11049	1.39926	0.941864	0.877808	0.309502
COX20	NM_001312872	2519	4.01876	3.02866	7.23348	2.07852	0	0	0.753445	0.418643	0	0
COX4I1	NM_001861	763	31.0751	27.0221	15.5369	24.165	16.2844	4.78256	0.869546	1.73911	0.673853	3.40423
COX5A	NM_004255	1173	10.5313	14.2614	11.8474	13.6175	0	15.8031	1.35407	1.20366	0	0
COX5B	NM_001862	690	11.2258	15.1074	2.00444	8.48306	30.0439	36.0968	1.34565	7.53322	3.54122	0.832294
COX6A1	NM_004373	537	2.12374	4.16803	0	1.66429	4.82269	0	1.96166	4168.03	2.896	4822.69
COX6B1	NM_001863	488	18.5308	25.8618	10.2945	8.06773	9.35108	6.86585	1.39554	2.51196	1.15893	1.36177
COX6B2	NM_001369800	1646	0.973925	1.72033	0	0.572403	0	0	1.76458	1720.33	0	0
COX6C	NM_004374	744	9.01313	10.0956	12.0903	3.10092	0	0	1.11998	0.834949	0	0
COX7A2L	NM_004718	2282	10.5348	4.39347	6.03524	6.19169	5.98065	6.58676	0.417003	0.727849	0.965759	0.907843
COX7B	NM_001866	2444	1.77595	1.04563	0	0	0	0	0.588444	1045.63	0	0
COX7C	NM_001867	629	4.97453	5.85781	9.94871	2.33903	6.77779	19.9059	1.17732	0.588742	2.89645	0.340474
COX8A	NM_004074	494	33.5447	40.441	33.9427	20.6547	70.7328	119.848	1.20555	1.19141	3.42437	0.590182
CPA4	NM_016352	2817	2.15605	2.20041	0	13.6868	15.6682	1.43796	1.0201	2200.41	1.14468	10.8885
CPD	NM_001304	9372	5.19418	3.84922	3.35819	3.73719	3.05049	2.23973	0.74092	1.14587	0.816035	1.36139
CPE	NM_001873	2582	4.58756	2.34082	2.29367	10.0664	22.9187	102.495	0.510143	1.02011	2.27652	0.223605
CPEB2	NM_001177382	7069	0.588731	0.762537	0	0.83043	1.2032	3.53371	1.29302	762.537	1.44714	0.340396
CPEB3	NM_014912	7781	0.620449	0.487056	0.172363	0.405179	0	2.75894	0.783742	2.80946	0	0
[truncated: 9,126 more rows]
