# Supplementary material for: A dual-activity topoisomerase complex regulates translation and abundance of mRNAs important for psychiatric disorders
Source: Research Square preprint supplement (doi:10.21203/rs.3.rs-1054387/v2), 2022-03-25
Supplement: Supplementary file 2 [file feef1cd7fe4efe20a102d8ab.xlsx]

## Sheet: Sheet1
Table S1. Differentially expressed genes (DEGs) in TOP3B-KO, TDRD3-KO and Y336F-KI cells in comparsion to WT cells identified by PRO-seq.
sheet1: Gene lists of DEGs in different mutant cells using the fold changes of normalized read counts of PRO-seq at TSS regions (Fold change > 1.2 in two replicates).
sheet2: Normalized read counts of PRO-seq in different subregions (TSS, exon, intron and TES) in replicate 1 and replicate 2.
TOP3B-KO						TDRD3-KO						Y336F-KI						DEGs in three mutants							DEGs in three mutants
down (462)			up (1521)			down (818)			up (2605)			down (2259)			up (908)			down (132)							up (335)
Symbol	TOP3B-KO.FC1.TSS	TOP3B-KO.FC2.TSS	Symbol	TOP3B-KO.FC1.TSS	TOP3B-KO.FC2.TSS	Symbol	TDRD3-KO.FC1.TSS	TDRD3-KO.FC2.TSS	Symbol	TDRD3-KO.FC1.TSS	TDRD3-KO.FC2.TSS	Symbol	Y336F-KI.FC1.TSS	Y336F-KI.FC2.TSS	Symbol	Y336F-KI.FC1.TSS	Y336F-KI.FC2.TSS	Symbol	TOP3B-KO.FC1.TSS	TOP3B-KO.FC2.TSS	TDRD3-KO.FC1.TSS	TDRD3-KO.FC2.TSS	Y336F-KI.FC1.TSS	Y336F-KI.FC2.TSS	Symbol	TOP3B-KO.FC1.TSS	TOP3B-KO.FC2.TSS	TDRD3-KO.FC1.TSS	TDRD3-KO.FC2.TSS	Y336F-KI.FC1.TSS	Y336F-KI.FC2.TSS
AAMDC	0.822278724	0.778114433	A4GALT	1.256591512	1.283866284	AAMDC	0.791461995	0.661378885	A4GALT	1.92261329	1.715902716	AAAS	0.593999591	0.644842126	A4GALT	1.35419302	3.112860113	AAMDC	0.822278724	0.778114433	0.791461995	0.661378885	0.660729662	0.728216414	A4GALT	1.256591512	1.283866284	1.92261329	1.715902716	1.35419302	3.112860113
AASS	0.679830261	0.311916803	AADAT	1.43410355	1.393511623	AASDH	0.80103114	0.686635082	AADAT	1.38582568	1.41295177	AAMDC	0.660729662	0.728216414	ABCB10	1.286518447	1.669790606	ABCC2	0.79340328	0.813800212	0.594904139	0.611895502	0.751392835	0.693946432	ABCB10	1.354696398	1.561773407	1.499670543	1.749156681	1.286518447	1.669790606
ABCC2	0.79340328	0.813800212	AAR2	1.218992536	1.219399432	AASS	0.482111126	0.42016288	ABCA2	1.791646583	1.952171392	AASDH	0.781799122	0.61254641	ABHD15	1.248886827	1.733510037	ABLIM1	0	0	0.196748486	0.439948737	0.278418872	0.367447821	ABHD15	1.411459129	1.339242296	1.3437957	1.371275092	1.248886827	1.733510037
ABHD3	0.79110723	0.778867139	ABCA1	2.188002008	1.587214325	ABCC2	0.594904139	0.611895502	ABCA3	2.441381244	2.661474147	AASDHPPT	0.670727749	0.724873666	ABL1	1.292598923	2.365490011	ACSL5	0.44212202	0.337127	0.453354558	0.329396598	0.693471534	0.552356188	ACAP3	1.320047026	1.366236252	1.442314214	1.289567901	1.481234881	1.949231811
ABHD8	0.627253669	0.792390563	ABCA2	1.422188344	1.731538336	ABHD17A	0.703307856	0.799774109	ABCA7	1.348922667	1.407120431	ABCA1	0.657797858	0.725045158	ABRAXAS2	1.299081819	1.524004973	ACTR6	0.767229203	0.621018198	0.481937184	0.512071649	0.502424392	0.456385175	ACSF3	1.543287126	1.367445268	1.613130201	1.489249819	1.265674915	1.585938541
ABLIM1	0	0	ABCA3	1.669610454	1.878767877	ABHD8	0.806918239	0.82825583	ABCB10	1.499670543	1.749156681	ABCC2	0.751392835	0.693946432	ACAP3	1.481234881	1.949231811	AKR1C3	0.548200274	0.489729418	0.533939469	0.396510477	0.326379375	0.115863719	ADAMTSL5	1.3746786	1.468248183	2.245098039	1.900178199	1.500245343	1.981967479
ABTB2	0.820294306	0.720154246	ABCA7	1.45141711	2.170235541	ABLIM1	0.196748486	0.439948737	ABCC10	1.270756046	1.411444823	ABCG1	0	0	ACBD3	1.288998711	1.41175361	ANAPC10	0.50428	0.590436164	0.527879381	0.483737379	0.755227681	0.707713597	ADGRF1	4.196973719	4.435601692	1.481622704	1.518935025	1.718126312	2.276303986
ACACB	0	0	ABCB10	1.354696398	1.561773407	ABRACL	0.723342608	0.644905137	ABCC4	1.278801381	1.661738534	ABHD10	0.600172833	0.508605942	ACOT11	262	120.4	ANXA10	0	0.414340449	0	0	0	0	AFDN	1.49347075	1.298831516	1.702172513	1.534452283	1.572978275	2.260398254
ACOT9	0.783253026	0.809305796	ABHD13	1.264744641	1.309371283	ACACB	0	0	ABCD1	1.471880184	1.486431153	ABHD11	0.696719969	0.731932132	ACSF3	1.265674915	1.585938541	ANXA5	0.693070972	0.667381294	0.653386711	0.778086307	0.451042246	0.642472629	AGPS	1.22159268	1.409588248	1.386600125	1.307506292	1.204279061	1.44035571
ACOX2	0	0	ABHD14A	1.242267014	1.384802984	ACAD11	0.79839905	0.803997914	ABCD4	1.217464996	1.259713096	ABHD3	0.58276497	0.691672095	ACSL1	1.526812942	1.349701814	ARHGAP26	0.699242644	0.777568136	0.696887087	0.563394235	0.541403282	0.808962764	AHDC1	1.277987818	1.623082711	1.674910733	1.264513515	1.651333753	1.928344041
ACSL5	0.44212202	0.337127	ABHD14A-ACY1	1.242267014	1.384802984	ACADSB	0.786207813	0.707005142	ABHD11	1.229032237	1.399280971	ABLIM1	0.278418872	0.367447821	ACTR5	1.203810256	1.679961386	ARL14EPL	0.76714397	0.498911638	0.826879992	0.450532725	0.563729788	0.256198753	AKAP11	1.36083887	1.479836158	1.398640378	1.384378581	1.367490704	1.61556156
ACTA1	0.162889518	0.647381911	ABHD15	1.411459129	1.339242296	ACAT1	0	0.539368999	ABHD14A	1.364785374	1.220289972	ABRACL	0.769365898	0.609342099	ACVR1C	1.523618633	2.71059379	ATF4	0.822629739	0.72030994	0.613377212	0.657781909	0.600348431	0.488601166	ALOX5	1.470005356	1.569723963	2.314729513	2.474760805	5.778468131	7.283789728
ACTR3C	0	0	ABLIM3	1.251044491	1.309679785	ACBD7	0.81311001	0.583063104	ABHD14A-ACY1	1.364785374	1.220289972	ABTB1	0.815937864	0.797895839	ADAMTSL5	1.500245343	1.981967479	C14orf132	0.628723214	0.725335416	0.488820343	0.613210009	0.455595683	0.647980927	ALS2CL	1.363275445	1.512692572	1.648592416	2.005234396	1.446588255	1.862298433
ACTR6	0.767229203	0.621018198	ACADVL	5.397113843	3.583333333	ACSL1	0.739754556	0.443535084	ABHD15	1.3437957	1.371275092	ACACA	0.632034996	0.600801859	ADGRF1	1.718126312	2.276303986	C8orf44-SGK3	0.804420467	0.538348585	0.818990518	0.590813214	0.704112023	0.477611738	ANKEF1	1.401361156	1.222261239	1.414343382	1.351944191	1.252658929	1.252904776
ADAL	0.829260079	0.823032684	ACAP3	1.320047026	1.366236252	ACSL5	0.453354558	0.329396598	ABHD17C	1.355132377	1.474861333	ACADM	0.69449154	0.733827876	ADNP	5.049355269	1.830040527	CALD1	0.778602641	0.5933009	0.209462952	0.171000391	0	0.201979534	ANKS3	1.35859739	1.581811562	1.275479077	1.274552176	1.397251459	1.693524257
ADAM19	0.419862485	0.691686144	ACD	1.642731983	1.509878434	ACSM3	0.632486303	0.594991416	ABI2	1.462951321	1.384871955	ACADVL	0.816942811	0.304964539	ADPRHL1	1.637239902	4.177623591	CASP10	0.556183104	0.330934517	0.26674938	0.301059902	0	0.020483506	ANO9	1.22612628	1.593285473	1.5003157	1.590762811	1.367721843	2.175042143
ADGRE2	0.413646055	0	ACE	1.271125806	1.500551599	ACTR6	0.481937184	0.512071649	ABLIM3	1.607989156	1.667966862	ACBD5	0.699337696	0.785013744	AFDN	1.572978275	2.260398254	CBR4	0.795261553	0.779274027	0.685014258	0.775734287	0.653482632	0.604642644	AP2M1	1.389979831	1.329690671	1.493643324	1.576250585	1.257839232	1.365195477
ADNP	0.460204535	0.831813576	ACSF3	1.543287126	1.367445268	ACVR1	0.721498049	0.605661037	ACADVL	3.391234634	2.766717325	ACBD6	0.786386169	0.769257111	AGPS	1.204279061	1.44035571	CBWD1	0.652459895	0.672957862	0.537605286	0.389281331	0.641298848	0.437910814	APOBEC3F	1.328175968	1.256115265	1.624960331	1.657555553	1.319456656	1.449154388
AFAP1L1	0.719470787	0.811185097	ACVR2B	1.539617611	1.286505274	ADAT1	0.768952709	0.795782831	ACAP3	1.442314214	1.289567901	ACOT9	0.640409553	0.724567383	AHDC1	1.651333753	1.928344041	CBWD2	0.714471228	0.562949949	0.501055109	0.589818306	0.389943998	0.51602674	APOBEC3H	2.341191412	2.463278531	2.307258801	2.661166447	2.29682105	3.287621505
AGPAT4	0.747217466	0.610257988	ACY1	1.356866824	1.345935091	ADGRE2	0	0	ACD	1.66513056	1.290909708	ACOX1	0.684113445	0.758218304	AKAP11	1.367490704	1.61556156	CBWD3	0.222620413	0.234549139	0	0.29508612	0.62600344	0	ARCN1	1.701507825	1.317788875	1.551302163	1.21814261	1.26834646	1.376240199
AIFM1	0.804650767	0.784170259	ADA	1.212577608	1.558570718	ADNP	0.609604269	0.774569402	ACO1	1.420343421	1.220361412	ACOX2	0	0	AKR1B1	1.329467629	1.324761643	CBWD6	0.191823123	0	0.126976285	0.133731618	0.341650198	0	ARFGAP1	1.482896193	1.606849447	1.777883477	1.702785072	1.293142946	2.175910087
AKNA	0	0	ADAMTSL5	1.3746786	1.468248183	AGPAT4	0.830324457	0.686731532	ACP7	1.213289724	1.307923804	ACSL3	0.738835706	0.775137978	AKT1	1.225190165	2.273397119	CCDC113	0.652761844	0.677453556	0.685830603	0.677398905	0.719435224	0.688824603	ARFGAP3	1.476432273	1.287976999	2.017842135	1.702359686	1.631513517	1.768709913
AKR1C3	0.548200274	0.489729418	ADAP1	1.215925745	1.365858954	AKAP12	0.711656877	0.671910119	ACSF3	1.613130201	1.489249819	ACSL5	0.693471534	0.552356188	ALG14	1.620324571	1.558550791	CCNB1	0.782387042	0.703924065	0.808796209	0.828792255	0.536547954	0.639162862	ARHGEF1	1.405585675	1.356815242	1.926868613	2.194292211	1.20697999	1.787580854
ALDH1L2	0.712150847	0.580917695	ADCY3	1.27353492	1.669328345	AKNA	0	0.319078947	ACSS2	1.417906591	1.335390639	ACSM3	0.573372805	0.481217808	ALOX5	5.778468131	7.283789728	CD33	0.240625705	0.209851597	0.070299526	0.073572663	0.0447547	0	ATP6V0D1	1.518484822	1.281591124	1.433282719	1.458348535	1.290812805	1.462112657
ALG1L2	0	0	ADCY7	1.299408338	1.678847818	AKR1C3	0.533939469	0.396510477	ACTL8	2.282956059	1.86351706	ACTN4	0.588467669	0.466052437	ALOXE3	1.205183797	1.698083484	CENPF	0.760445742	0.664334184	0.763603276	0.728486746	0.48827151	0.455087635	AXIN2	1.401278945	1.570018287	2.031677437	1.864468265	1.334787291	1.897771368
AMMECR1L	0.609850107	0.57644911	ADCY9	1.315366024	1.323866964	ALKBH8	0.738510757	0.646045038	ACTR3B	1.207231479	1.401139454	ACTR3	0.684479633	0.75311534	ALS2CL	1.446588255	1.862298433	CENPW	0.735505772	0.589696517	0.538867535	0.458576768	0.493224571	0.375658544	B4GALT4	1.310214287	1.302358824	1.304015099	1.334471891	1.307638072	1.401017239
ANAPC10	0.50428	0.590436164	ADD1	1.651630391	1.57952442	AMIGO3	0.478863806	0.667911154	ACTR5	1.338876688	1.292647837	ACTR6	0.502424392	0.456385175	AMOTL2	1.36146016	1.406876791	CEP44	0.80540153	0.658474077	0.694916162	0.512893718	0.569531168	0.539057895	BCL3	1.407002086	1.667760221	1.600012786	1.408658139	1.233699285	1.800120391
ANGPT2	0.016587192	0.048899257	ADGRB2	1.567644233	1.782817814	ANAPC10	0.527879381	0.483737379	ACVR1B	1.279498185	1.381039386	ACTRT3	0.753166512	0.765115106	ANAPC7	1.426365796	3.380446723	CNOT10	0.808354784	0.714948578	0.791429707	0.675264895	0.583686619	0.692197949	BCR	1.559582837	1.575705848	1.677663406	1.598378094	1.266056797	1.716718501
ANKRD42	0.789157927	0.805603651	ADGRF1	4.196973719	4.435601692	ANAPC7	0.305225653	0.79989015	ACVR1C	1.659163182	1.61953238	ADAM10	0.808356674	0.808849863	ANKEF1	1.252658929	1.252904776	COIL	0.768610317	0.757041039	0.813685868	0.74401306	0.723121406	0.6314331	BIRC2	1.517820321	1.332910836	1.74031057	1.213856089	1.401625959	1.531004934
ANKRD6	0	0	ADI1	1.375009794	1.207966632	ANGPT2	0.136286725	0.075671601	ACY1	1.265237512	1.330025555	ADAM9	0.687779828	0.704492887	ANKRD44	1.360232821	1.580066553	DBF4B	0.714048375	0.652600223	0.718228064	0.604440958	0.570611537	0.505666598	BMP7	1.205825952	1.298302687	2.140200286	1.854125413	1.489026877	1.741112683
ANXA10	0	0.414340449	ADIRF	1.754053994	1.970361985	ANKMY2	0.758384098	0.817122274	ACYP1	1.440314373	1.295104264	ADGRG1	0.779099153	0.601943495	ANKS3	1.397251459	1.693524257	DDX27	0.77508326	0.790274836	0.67381006	0.678108036	0.702959569	0.820803817	BMP8A	1.49859728	1.217357094	1.881097407	1.54287795	1.490294697	1.256614797
ANXA5	0.693070972	0.667381294	ADO	1.434346925	1.252313311	ANKRD6	0	0	ADA	1.376788502	1.488906254	ADGRV1	0.596822695	0.733700997	ANO8	1.322364983	1.829841404	DDX5	0.765728591	0.680748639	0.532632814	0.747884288	0.574789351	0.458209664	BRF2	1.228000826	1.334263492	1.26067974	1.443541408	1.275481635	1.523161504
APC2	0.516644474	0.461622807	ADRA2C	1.207398009	1.228675852	ANP32E	0.741391245	0.79322066	ADAM11	1.472850331	1.715427241	ADM	0.71190394	0.813550149	ANO9	1.367721843	2.175042143	DOCK9	0	0	0	0.713507625	0	0	BTBD11	1.220018848	1.383358962	1.283656435	1.294659266	1.370072698	2.506600908
APOBEC3D	0.767975186	0.682347183	AFAP1	1.250309982	1.537938899	ANXA10	0	0	ADAM19	1.40358919	1.279704269	ADM2	0.505681206	0.417000678	AOC2	1.870556745	4.167435728	EFCC1	0	0.592957746	0	0	0	0	C11orf45	1.217758493	1.299201255	1.777931476	1.693285433	1.43097398	1.822689474
ARHGAP26	0.699242644	0.777568136	AFDN	1.49347075	1.298831516	ANXA5	0.653386711	0.778086307	ADAMTS14	1.431249009	2.242635113	ADORA2B	0.778507345	0.789695778	AP1M2	1.222578775	1.541213849	EGR1	0.793840024	0.67341559	0.582815497	0.585589158	0.613308957	0.638151445	C11orf95	1.386146393	1.539121611	1.542520724	1.442326001	1.203971555	1.541188555
ARHGAP40	0.698134849	0.600953045	AFF1	1.239632213	1.27532703	ANXA7	0.8272103	0.699320701	ADAMTS17	1.251372945	1.23267318	AFAP1L1	0.373658731	0.577204951	AP2M1	1.257839232	1.365195477	EIF4E	0.7489146	0.668844198	0.653827488	0.724913709	0.632799169	0.516861982	C1orf198	1.242161492	1.376546448	1.206946748	1.275389777	1.385872753	1.89128744
ARL14EPL	0.76714397	0.498911638	AGAP1	1.2757832	1.401606529	AP2B1	0.75082564	0.731944334	ADAMTSL5	2.245098039	1.900178199	AFMID	0.700621736	0.760629901	APBA3	1.296879842	1.454504578	EXOC6B	0.822290734	0.754844996	0.743015388	0.758576912	0.664962349	0.635228816	C8orf58	1.598306144	1.386747095	2.061331211	1.979346635	1.206582163	1.430591069
ARL4A	0.785394362	0.639046312	AGO1	1.678540716	1.282246632	APOBEC3A	0	0	ADAP1	1.275572435	1.859540559	AGPAT5	0.806332108	0.798702295	APOBEC3F	1.319456656	1.449154388	FAM174A	0.757474242	0.750129878	0.528616177	0.687124851	0.595260011	0.736286836	CAMSAP1	1.35224164	1.581391278	1.651692252	1.684436887	1.273857702	1.736409782
ARMC8	0.816040819	0.822434507	AGO2	1.396736439	1.223622752	APTX	0.784665933	0.713839994	ADAP2	1.709224559	1.581122711	AHCTF1	0.699631319	0.722063346	APOBEC3H	2.29682105	3.287621505	FAM72A	0.478610231	0.409013223	0.491662894	0.655032833	0.346008752	0.312854187	CANT1	1.684037707	1.273208057	1.509873258	1.226960729	1.25688512	1.683511155
ATF3	0	0	AGPAT3	1.200442485	1.348002151	AREG	0.809579309	0.678962696	ADARB1	1.237692539	1.232271367	AIMP2	0.748794783	0.703526221	APOL2	1.24842974	1.779517956	FGF2	0.636760525	0.538132321	0.253435089	0.229999164	0.640550968	0.618061876	CASKIN2	1.213093107	1.439977444	1.35871456	1.387816366	1.220063739	2.13702856
ATF4	0.822629739	0.72030994	AGPS	1.22159268	1.409588248	ARHGAP26	0.696887087	0.563394235	ADCK1	1.320683581	1.457611328	AIP	0.667658347	0.649253865	APOL6	1048.2	1.586517347	FN1	0.31958086	0.198710633	0.513419822	0.181945773	0.688218919	0.705743545	CCDC92	1.602358447	1.263084009	2.534437637	1.22683053	2.42064103	2.05627663
ATF7IP	0.218701591	0	AGRN	1.523102759	1.257847783	ARHGAP29	0.795931226	0.691146321	ADCK2	1.245462174	1.406418913	AK1	0	0	AQP3	1.303539315	1.286787353	FOCAD	0.628845435	0.551221329	0.363058911	0.406896919	0.516751775	0.669309776	CCDC93	1.465553017	1.296523826	1.900822105	1.734600232	1.573582329	2.346772124
ATP11C	0	0	AHDC1	1.277987818	1.623082711	ARHGAP32	0	0	ADCY3	1.45155722	1.94517501	AK2	0.618433297	0.494377484	ARAP1	1.211170296	1.585423918	GCNT3	0.534578961	0.397029645	0	0.021452567	0.558962546	0.48891028	CD151	1.474368447	1.493183245	1.909526475	1.951848952	1.29624986	1.58825106
ATP12A	0.572135145	0.595567968	AK8	1.3656451	1.201092168	ARHGAP39	0.684420772	0	ADCY9	1.824214526	1.586874349	AKAP12	0.52805227	0.64324608	ARCN1	1.26834646	1.376240199	GDAP1	0.696591146	0.677709581	0.517834438	0.550985397	0.461539668	0.563538787	CDC42BPG	1.680020441	1.327540993	1.593393831	1.287451772	1.70447225	1.790676995
ATP6V1C2	0.732437529	0.749660279	AKAP1	1.204422066	1.337049615	ARHGAP40	0.443305058	0.47907175	ADD1	1.749848197	1.532820732	AKIRIN1	0.725754618	0.722653393	ARFGAP1	1.293142946	2.175910087	GLS	0.665661181	0.812904097	0.559966466	0.687226727	0.524535738	0.583196664	CDK6	1.587189151	1.234105885	1.874055911	1.298006409	1.216410117	1.295978012
ATXN1	0.815861087	0.562323734	AKAP11	1.36083887	1.479836158	ARL14EPL	0.826879992	0.450532725	ADGRA2	1.531501508	1.628348003	AKR1A1	0.648174194	0.648002808	ARFGAP3	1.631513517	1.768709913	GOLPH3L	0.803661292	0.586207122	0.634884327	0.456971606	0.617901056	0.506366346	CEP104	1.488540617	1.624143079	1.610045151	1.617561927	1.545072577	3.05751399
BAIAP3	0.172905526	0	AKAP8	1.244720365	1.30317578	ARMCX5	0.823838044	0.721174808	ADGRB2	1.62675573	1.541788251	AKR1C3	0.326379375	0.115863719	ARHGAP32	4.8891258	120.4	HEXIM2	0.587265923	0.693550595	0.556703004	0.617366942	0.811101031	0.643080837	CHPF2	1.416581407	1.277244828	1.781330744	1.263487156	1.302746805	1.938122301
BAZ2B	0.733917522	0.67777113	AKR7A3	181.2	143.1	ARMCX5-GPRASP2	0.823838044	0.721175519	ADGRF1	1.481622704	1.518935025	ALCAM	0.681200155	0.684680835	ARHGAP44	1.211854267	1.945170344	HSD3B7	0.814041398	0.744094488	0.478322568	0.520617489	0.384713251	0.540628145	CIAO1	1.430732188	1.269414356	1.319708942	1.313121926	1.461502145	1.823950759
BICDL2	0.2304038	0	AKR7L	2.751992914	176.8	ARNTL	0.801527315	0.816344317	ADI1	1.285788651	1.250829004	ALDH16A1	0.67367332	0.657273192	ARHGAP45	1.529597831	3.07595928	HYPK	0.82293918	0.732580437	0.690768898	0.613777879	0.60942625	0.628710047	CKAP4	1.593212161	1.439962206	1.482255574	1.472258864	1.233873348	1.532655578
BMP6	0.647772359	0.726360844	ALDH1A3	1.314602413	1.78970978	ASB3	0.69164495	0.624906063	ADIRF	1.314376983	1.469003941	ALDH1L2	0.280310902	0.294757299	ARHGEF1	1.20697999	1.787580854	ICAM1	0.443699694	0.45945079	0.521356654	0.549743245	0.068217665	0.071648278	CLIP2	1.408788356	1.273027337	2.136133897	1.487469735	1.200292761	1.507656809
BUB1	0.739093844	0.689513923	ALDH3A2	1.450630018	1.216007477	ASNS	0.647906794	0.441678619	ADO	1.405889031	1.381460055	ALDH3A2	0.738418277	0.707685118	ARID3A	1.436711033	1.230046578	IFI35	0.739826736	0.556666255	0.692567905	0.762994126	0.574692229	0.61639308	CLMN	1.370314712	1.281689078	1.230055537	1.606963016	1.303234237	1.453501311
BUB1B-PAK6	0.244412968	0.793607162	ALOX5	1.470005356	1.569723963	ATF4	0.613377212	0.657781909	ADRA2C	1.217527662	1.367167513	ALDOC	0.454767183	0.601686992	ARID5A	1.55611639	4.107821637	ING4	0.726707916	0.747809336	0.748229891	0.754481171	0.551648912	0.553221979	CPNE7	1.348061698	1.259158411	1.47172624	1.655217668	1.286115271	1.583284559
C14orf132	0.628723214	0.725335416	ALS2CL	1.363275445	1.512692572	ATF5	0.679372234	0.785512518	ADRM1	1.231812062	1.332329003	ALG10	0.823590996	0.785558684	ARL6	1.293326668	1.496915679	INO80B	0.68255831	0.746403684	0.606222333	0.674426423	0.657676742	0.674757529	CPSF1	1.539759813	1.581090413	1.57082426	1.758392316	1.353750054	1.649439989
C1orf210	0.813394993	0.823165861	AMOT	1.921411192	2.716912402	ATF6	0.671996224	0.440869089	ADSL	1.345069327	1.439927817	ALG10B	0.720790567	0.731542726	ARMH4	1.304681465	1.879966762	INTU	0.723688335	0.681652879	0.586189268	0.611585526	0.68129338	0.826496228	CRABP2	1.832958967	1.771431511	1.535395424	1.668547225	1.24052951	1.32525379
C1orf216	0.26620037	0.794875637	ANK1	1.826627768	1.412162845	ATF7IP	0.144768342	0.308585779	AFAP1	1.408329335	1.440537762	ALG13	0.643859493	0.676737937	ASB7	1.24548063	1.901390338	KCTD7	0.654417675	0.750061978	0.653666719	0.804165615	0.460565341	0.665229522	CST3	1.441678404	1.484353505	1.473839235	1.525928569	1.340061541	1.536593127
C1orf226	0	0	ANKEF1	1.401361156	1.222261239	ATP12A	0.636147144	0.788426665	AFDN	1.702172513	1.534452283	ALG1L2	0	0	ATG101	1.217517442	1.462481056	KIAA0513	0.394736842	0.552818829	0.653699466	0.717022441	0	0.659003831	CTDSPL	1.922237337	2.103719467	1.855484198	2.189890205	2.169445411	1.807426598
C4orf3	0	0	ANKRD13B	1.481051336	1.909586839	ATP5MF	0.830398392	0.756853276	AFF1	1.516699135	1.32770284	ALG8	0.82120972	0.779541385	ATMIN	1.328753564	1.408800325	KIAA1143	0.709796444	0.731862704	0.614257531	0.671357402	0.619119575	0.694895871	CTU2	1.400560618	1.473988783	1.498117201	1.661922576	1.406251231	2.072202166
C6orf62	0.640222543	0.797381636	ANKRD24	1.546703812	1.250595109	ATP5MF-PTCD1	0.830398392	0.756853276	AFF4	1.327490498	1.284799852	ALKBH2	0.637256945	0.773278739	ATP5F1C	1.2156274	1.271137152	KIF15	0.707422363	0.733637937	0.612203003	0.672620393	0.621399529	0.69713157	CUEDC1	3.019957666	2.300499782	4.88941207	5.10970935	3.528316558	2.765733417
C8orf44-SGK3	0.804420467	0.538348585	ANKS3	1.35859739	1.581811562	ATP6V1B2	0.648488118	0.626581997	AFG3L2	1.360679877	1.387628196	ALPK1	0.622702729	0.323723309	ATP5MGL	1.321387014	1.565538376	KLF4	0.486469695	0.447388377	0.458302478	0.38952637	0.502524267	0.565245695	CXXC1	1.530645871	1.243279249	1.96287026	1.351039927	1.51076033	1.835729341
CA5B	0	0	ANO10	1.356602714	1.221599167	ATP6V1C1	0.740401897	0.707156299	AGAP1	1.398603287	1.754960353	AMBRA1	0.797680693	0.709281669	ATP6V0D1	1.290812805	1.462112657	LGALS8	0.212919152	0.276681287	0	0.638523392	0.538983748	0.733552632	CYB5R4	1.211996397	1.267335528	1.510428135	1.409303095	1.254286352	1.754925014
CAB39L	0	0	ANO6	1.260808464	1.207409223	ATXN7L1	0.832631695	0.762748031	AGAP3	1.327134337	1.661006909	ANAPC1	0.753107834	0.784552351	ATP6V0E1	1.444360461	1.607626533	LNX1	0.772954009	0.790666176	0.389423997	0.336125503	0.456911399	0.480327696	CYP26B1	2.420367279	530.5	1.488480801	305.8	2.479131886	441.5
CALD1	0.778602641	0.5933009	ANO8	1.419620269	1.497423822	BAIAP2	0.808860902	0.829759036	AGO1	1.728120659	1.387868622	ANAPC10	0.755227681	0.707713597	AXIN2	1.334787291	1.897771368	MAGEA2	0.628613119	0.616860175	0.658810291	0.650661915	0.515800343	0.396828235	CYP2R1	1.425388986	1.264862304	1.760258099	1.3485423	1.213702694	1.513178078
CARMIL2	0	0	ANO9	1.22612628	1.593285473	BANP	0.477942151	0.643564356	AGO2	1.523984108	1.272256561	ANAPC15	0.699712595	0.619484632	AZIN2	1.341224255	1.241499405	MAGEA2B	0.564785329	0.50576813	0.516822757	0.580722998	0.408313626	0.376460746	DBNL	1.332116522	1.446380291	1.574765967	1.42244405	1.293342927	1.88122788
CASP10	0.556183104	0.330934517	ANTXR1	1.474413513	1.555654125	BAZ1A	0.711226073	0.812744804	AGPAT2	1.303443473	1.213881598	ANKMY2	0.718156118	0.732218434	B3GNT4	1.465949299	1.949977292	MFGE8	0.825251512	0.72087123	0.666401488	0.651343085	0.634803442	0.755922998	DCUN1D2	1.682344749	1.325483074	1.91074706	1.479259566	1.32488448	1.43627755
CBR4	0.795261553	0.779274027	AP1M1	1.394766317	1.324720159	BAZ2B	0.592796156	0.535523344	AGPAT3	1.44281952	1.819992786	ANKRD10	0.705518202	0.693248355	B4GALT1	1.294782304	1.443177147	MFSD4A	0	0	0	0	0.292256214	0.491707501	DFFB	1.502716739	1.660065202	1.611348763	1.608685496	1.557013989	3.045286047
CBWD1	0.652459895	0.672957862	AP1S1	1.214923196	1.284936028	BBS12	0.798499672	0.791531827	AGPS	1.386600125	1.307506292	ANKRD13C	0.801875863	0.80018429	B4GALT4	1.307638072	1.401017239	MMEL1	0.516644474	0	0	0	0	0	DGKD	1.368078359	1.345147962	1.880624077	1.738198837	1.540353785	1.952720327
CBWD2	0.714471228	0.562949949	AP2A2	1.593649965	1.505243756	BCL11A	0.721581128	0.557547463	AGRN	1.705750451	1.540007033	ANKRD18A	0.663554847	0.731866896	BACE1	1.300750842	1.524423085	MOB3B	0.496631422	0.664771207	0.358844697	0.506667559	0.450042008	0.832441352	DHCR7	1.26984988	1.293595713	1.397329732	1.390143196	1.299120981	1.66073468
CBWD3	0.222620413	0.234549139	AP2M1	1.389979831	1.329690671	BCL11B	0.593916059	0.518002512	AHDC1	1.674910733	1.264513515	ANKRD40	0.784070762	0.770083556	BAIAP3	2.141042781	481.6	MRPS22	0.802556973	0.793052239	0.779531459	0.78010025	0.731000011	0.684150534	DMPK	1.587335876	1.800278963	1.759135451	1.454281808	1.639276405	1.851486653
CBWD6	0.191823123	0	AP3M2	1.539409219	1.245383917	BDH2	0.284803515	0.570402872	AHNAK	1.39481659	1.244268537	ANKS6	0.53047227	0.709584962	BAZ2A	1.278081268	1.782276127	MSX2	0.513938478	0.595284528	0.628477846	0.748391391	0.700843534	0.779162239	DPH7	1.472118559	1.4021185	1.406703029	1.235064657	1.433216911	1.343027266
CCDC113	0.652761844	0.677453556	APBA3	1.285207994	1.24285737	BET1	0.770546254	0.517220898	AHNAK2	1.580952099	2.164755995	ANKZF1	0.75408564	0.654260443	BCAS1	8.495423341	1364.7	NASP	0.730930643	0.672198874	0.493135594	0.610469364	0.563670163	0.469630596	DUSP22	1.493762496	1.553648044	1.845719365	1.633025941	1.24176433	1.778729298
CCDC88A	0.643155834	0.715848255	APBB1	1.303394606	1.205382735	BICD1	0.791322817	0.738644871	AIDA	1.241118739	1.221278002	ANP32A	0.765040214	0.798439386	BCL3	1.233699285	1.800120391	NEDD4	0	0.355399061	0	0	0	0	EFCAB14	1.283231123	1.391331022	1.765169695	1.566879254	1.541715867	2.220177203
CCNB1	0.782387042	0.703924065	APEH	1.392974949	1.236316619	BICDL2	0	0	AIF1L	1.44363769	1.529059402	ANP32B	0.628180559	0.531192486	BCL9L	1.205846548	1.223785289	NFRKB	0	0.414340449	0	0	0	0.659003831	ELMO2	1.24851632	2.534578856	1.569032311	2.678958398	1.278066271	2.559414991
CD33	0.240625705	0.209851597	APLP1	1.20376262	1.813032748	BIK	0.721020826	0.793105123	AIFM2	1.203763526	1.399049137	ANP32E	0.58513016	0.504090195	BCR	1.266056797	1.716718501	NR2F1	0.79302548	0.59067386	0.584759774	0.580063206	0.456065614	0.35713277	ELOF1	77.6	75.7	274.3	262.1	786.2	441.5
CDIP1	0.447855493	0.407897157	APOBEC3A	77.6	75.7	BPNT1	0.793510822	0.622780587	AK4	1.279908857	1.689495225	ANXA1	0.821607308	0.499930673	BCS1L	1.403492846	1.711517505	NR2F2	0.609173614	0.46973691	0.763705455	0.553517007	0.654375903	0.564535923	EMC3	1.456602374	1.74554218	1.632645071	1.348719045	1.314066106	1.553481967
CDRT1	0	0	APOBEC3F	1.328175968	1.256115265	BRCA1	0.683329898	0.608673261	AKAP1	1.310898632	1.547405641	ANXA10	0	0	BIRC2	1.401625959	1.531004934	NR4A1	0.81307549	0.523871459	0.663266211	0.54060786	0.818805997	0.753555258	ENDOV	1.401127173	1.283598676	1.375874723	1.391934717	1.263256422	1.686001121
CDRT4	0	0.824618736	APOBEC3H	2.341191412	2.463278531	BRD8	0.732668907	0.790316898	AKAP11	1.398640378	1.384378581	ANXA5	0.451042246	0.642472629	BLCAP	2.907456724	1.314496314	OARD1	0.81886563	0.725771037	0.696808676	0.602272869	0.676296984	0.656893555	EPB41L4A	1.727529014	1.595663899	2.868533571	2.038854588	2.175351219	2.036761053
CDYL	0	0	APOD	1.233079952	1.272258348	BRIP1	0.616839796	0.759892384	AKAP13	1.239212669	1.456494546	AP2B1	0.666118182	0.505350001	BLVRA	1.560050004	1.619170826	OPHN1	0.793054416	0.752120533	0.791771545	0.614171008	0.810882504	0.726792529	EPS8L2	1.225743681	1.32469	1.795523027	1.946851428	1.205101396	2.116685004
CENPF	0.760445742	0.664334184	ARCN1	1.701507825	1.317788875	BRSK2	0	0	AKAP8	1.374578435	1.455382802	AP2S1	0.797978099	0.627902883	BMP7	1.489026877	1.741112683	OSR1	0.537789622	0.487305276	0.530226007	0.504376705	0.619296465	0.577137852	ETS2	1.404541395	1.462904691	1.954131247	2.021702459	1.361632984	1.650481736
CENPW	0.735505772	0.589696517	ARF1	1.530955424	1.245547517	BSG	0.816626436	0.82916972	AKIRIN1	1.394551799	1.470597502	AP3S1	0.725635673	0.470831669	BMP8A	1.490294697	1.256614797	PAIP2	0.750852178	0.632756287	0.627106182	0.582001177	0.638014652	0.597028881	EXD3	1.696541815	1.281089873	1.928059808	1.777953777	1.266969523	1.376187996
CEP44	0.80540153	0.658474077	ARF5	1.963108918	1.803113929	BTD	0.800101931	0.740287684	AKR7A3	1234.7	742.8	AP4M1	0.767193384	0.742904824	BRD1	305.7	120.4	PARM1	0.760507235	0.713569979	0.437164689	0.467714276	0.627715819	0.555632769	EXOC3	1.41509192	1.360109622	1.732770415	1.234762485	1.481445062	1.581656516
CILP2	0.815895898	0.752735539	ARFGAP1	1.482896193	1.606849447	BTN3A2	0.757260279	0.768124166	AKR7L	6.075287865	371.4	AP4S1	0.80298957	0.832013024	BRD3OS	1.474854802	1.355091187	PCDHGA5	0	0	0	0.358816276	0	0.49486231	FAM160B1	1.51335502	1.574905408	1.414285228	1.512306874	1.310416089	1.589320905
CLMP	0.652235636	0.782640166	ARFGAP3	1.476432273	1.287976999	BUB1B-PAK6	0.485678313	0.703447734	ALDH1A3	1.66534333	2.025346387	APAF1	0.616974111	0.757376843	BRD4	2.707705934	120.4	PCDHGB2	0.50328068	0	0	0.442502533	0	0.304964539	FBXL16	1.279420561	1.48122517	1.427193051	1.735934897	1.476710619	1.73615917
CLSTN3	0.802142407	0.82291226	ARFGEF1	1.240670217	1.369187058	BYSL	0.820957777	0.825430648	ALDH7A1	1.213326037	1.320415103	APBB2	0.832518848	0.80830333	BRF1	1.237938773	1.372457004	PCDHGB6	0	0	0	0.307511737	0	0	FBXO2	1.779079538	2.101439036	2.236453557	2.127681943	1.245749406	2.112240284
CLUAP1	0.815600462	0.751267127	ARFRP1	1.298290422	1.457174684	BZW2	0.728871898	0.794098564	ALG12	1.251197099	1.737338728	API5	0.665271209	0.60356102	BRF2	1.275481635	1.523161504	PFDN5	0.746631897	0.709676663	0.575365941	0.685316012	0.649341648	0.599168787	FBXO31	1.290752725	1.221580456	2.02410984	1.556714785	1.694703047	2.43599284
CNOT10	0.808354784	0.714948578	ARHGAP12	1.67427853	1.221315003	C14orf132	0.488820343	0.613210009	ALG6	1.362713177	1.429194149	APLP2	0.477234863	0.584512987	BRWD3	1.204089629	1.24446252	PHGDH	0.795572052	0.386539272	0.494970622	0.388540079	0.328279569	0.20310732	FBXO44	1.746755336	2.112585177	2.215043334	2.145938219	1.23106619	2.159135921
CNTNAP3	0.214374431	0.713702715	ARHGAP21	1.225761701	1.216725657	C16orf46	0.73046184	0.73964512	ALOX5	2.314729513	2.474760805	APOBEC3A	0	0	BTBD11	1.370072698	2.506600908	PHLDB2	0.4935164	0	0.392067124	0	0	0	FBXO6	1.258508588	1.250804541	1.391056187	1.233641004	1.322807463	1.394301611
CNTNAP3B	0.64056493	0.431909248	ARHGAP8	1.346218029	1.22254951	C1orf112	0.74121455	0.69878189	ALS2CL	1.648592416	2.005234396	APOBEC3B	0.674899967	0.734265642	C11orf45	1.43097398	1.822689474	PLAT	0.825374562	0.780164245	0.546636914	0.322032709	0.417660185	0.647996069	FBXO9	1.381917647	1.38631857	1.387575054	1.231604234	1.40568943	1.529363135
COIL	0.768610317	0.757041039	ARHGEF1	1.405585675	1.356815242	C1orf216	0.564287184	0.720107881	AMFR	1.372119076	1.250644919	APOBEC3D	0.688497915	0.458396781	C11orf95	1.203971555	1.541188555	PNMA1	0.697110376	0.599069078	0.609666371	0.832804638	0.540339488	0.679522855	FES	1.375553587	3.322646938	2.125775022	2.154952733	7.736935341	4.619399918
COL17A1	0.559765263	0.217142038	ARHGEF19	1.290844496	1.730301387	C22orf34	0.788269133	0.666283862	AMOT	1.293430657	2.576929748	APOD	0.710023812	0.82425561	C17orf58	1.307652987	1.283629822	PRDM1	0.487311044	0.519433469	0.696915571	0.481675068	0.481706805	0.790504973	FGF18	1.489942208	1.954935989	2.021876628	2.256244666	1.809187192	2.695049787
COMMD4	0.777815891	0.762918844	ARHGEF3	1.299191648	1.230855772	C3orf62	0	0.503126028	ANAPC16	1.382783248	1.433101589	APOLD1	0.526837841	0.495420386	C1R	305.7	1.32106523	PREPL	0.60021398	0.301396785	0.794935806	0.214641679	0.545114123	0.47890784	FHL1	2.217665953	1.481264315	1.321948608	1.781401741	1.449678801	1.654878607
COPZ1	0.824848926	0.698718329	ARHGEF38	1.38150289	252.6	C4orf3	0	0.713507625	ANAPC2	1.206731056	1.373498837	APOO	0.821662193	0.673431971	C1orf109	1.463540209	1.201307765	PRIM2	0.467390671	0.36718259	0.439381587	0.46342709	0.292464916	0	FRMD8	1.213957153	1.487170323	1.844570303	1.798236117	1.294951982	1.721541874
CORO1C	0	0.827190827	ARL8A	1.389863268	1.35794723	C4orf46	0.73816254	0.674605234	ANK1	1.737435353	1.302151732	APRT	0.667264169	0.824835861	C1orf198	1.385872753	1.89128744	PRPSAP2	0.777169149	0.799636467	0.742741444	0.627143784	0.636482917	0.660507357	GALNS	1.389828801	1.516228358	1.471897299	1.464205413	1.310279287	1.606052962
COX6B2	0.281127841	0.210109737	ARMCX3	1.33398795	1.474690842	C6orf226	0.670001506	0.691553667	ANKEF1	1.414343382	1.351944191	AREG	0.726756092	0.709394706	C1orf50	1.218106319	1.423385277	PRRT1	0.585375163	0.47384759	0.46323972	0.484937588	0.554648619	0.522745143	GATA2	1.315242454	1.464909144	2.049705928	1.67911273	1.607452154	2.009544977
CPA4	0.486948592	0.814250633	ARMH4	1.217901839	1.501284182	C8orf44-SGK3	0.818990518	0.590813214	ANKH	1.413365118	1.269603761	ARF6	0.609482228	0.54295458	C2orf49	1.373547385	1.352152861	PTP4A1	0.512576663	0.572920962	0.252930673	0.435395189	0	0	GLRX3	1.499278767	1.345293387	1.738666337	1.390122323	1.431070722	1.645791864
CPEB4	0.611721543	0.76380693	ARPC4	1.468499174	1.296393098	CA13	0.795089182	0.734788496	ANKLE2	1.400991006	1.397481947	ARHGAP11A	0.745082675	0.737133672	C3orf62	5.415411869	3.037841395	PTTG1	0.752996799	0.660763348	0.816544283	0.753920406	0.609513284	0.56496272	GLT8D1	103.5	2.201525054	102.8	1.665577342	305.7	8.745098039
CPVL	0.562052247	0.654380593	ARPC4-TTLL3	1.468499174	1.296393098	CAB39L	0	0	ANKRD10	1.278397642	1.378156502	ARHGAP17	0.639644963	0.532510178	C6orf62	1.518777045	1.324569584	RNF144B	0.815343173	0.720123519	0.78924286	0.579214652	0.728894548	0.661956872	GNPTG	1.945186256	2.223547114	1.915518512	2.24457999	1.981175937	3.545916386
CSF2RA	0.780261175	0.409584837	ARRDC4	2.256004945	2.2179571	CALCOCO1	0.661574024	0.734832878	ANKRD13B	1.490044168	1.703707504	ARHGAP18	0.806920879	0.556157456	C8orf58	1.206582163	1.430591069	RPL23A	0.827240041	0.75418287	0.823177642	0.829371008	0.778753336	0.645659442	GOLGA1	1.45163955	1.327850005	1.399389434	1.219839748	1.404001006	1.750494941
CTBP2	0.689081225	0.454427344	ARSA	1.207916738	1.296737959	CALCRL	0.644275924	0.221033602	ANKRD13D	1.202911494	1.592289672	ARHGAP26	0.541403282	0.808962764	C8orf76	1.256830988	1.570216695	RPS6KC1	0.783730325	0.683924935	0.653741953	0.610914207	0.450287105	0.417030295	GOLGA3	1.522551096	1.532014316	1.486461463	1.456951228	1.204599852	1.344179084
CUL1	0.741489476	0.656173105	ASAH1	1.216632077	1.431719883	CALD1	0.209462952	0.171000391	ANKRD33B	1.465221512	1.633243166	ARHGAP29	0.439644414	0.448125673	C9orf116	1.321725909	1.824916813	RPSAP58	0	0.551187551	0	0	0	0	GOLGA5	1.431780253	1.200035532	1.491308466	1.376900492	1.300221009	1.262366054
CWC22	0	0.647820247	ASAP2	1.298512663	1.367730537	CASP10	0.26674938	0.301059902	ANKRD36B	1.257902751	1.427212889	ARHGAP35	0.555875923	0.765710672	CALM1	1.237670614	1.321751519	RRN3	0.791739135	0.720300788	0.684203425	0.64312477	0.578792002	0.555949295	GORASP1	1.323936581	1.447984642	1.461472907	1.288420239	1.504966096	2.020695656
CYTH4	0.827233003	0.711306643	ASPHD2	1.2527351	1.476606981	CBLB	0.76561269	0.762975779	ANKRD39	1.307290385	1.403629431	ARHGEF2	0.680007241	0.791879132	CALML4	4.882381531	4.924296828	RSF1	0.825347659	0.762842648	0.821940235	0.707439598	0.659642408	0.752488824	GPAT2	1.442453121	1.400438314	1.796908707	2.072966353	1.242514757	1.780095398
DBF4B	0.714048375	0.652600223	ATAD3B	1.375473732	1.237385801	CBR4	0.685014258	0.775734287	ANKRD40	1.270523623	1.272150455	ARHGEF35	0.747097242	0.502528171	CAMSAP1	1.273857702	1.736409782	RTL8C	0.730316294	0.756208961	0.71757418	0.730648348	0.617549445	0.759939922	GPS1	1.266668563	1.672992681	1.566694161	1.605062634	1.418697915	2.446923671
DBT	0.805590388	0.620928233	ATG4D	1.320059599	1.332423677	CBWD1	0.537605286	0.389281331	ANKRD44	1.431955721	1.206774342	ARID5B	0.557182547	0.632223844	CANT1	1.25688512	1.683511155	SERTAD3	0.3408587	0.49873531	0.594103654	0.643588636	0.716222458	0.761467041	GPSM1	1.297207967	1.438761973	1.372288423	1.512878592	1.223293033	1.519673829
DDX27	0.77508326	0.790274836	ATP11A	1.313548434	1.237073616	CBWD2	0.501055109	0.589818306	ANKRD46	1.550548652	1.561493117	ARL14EPL	0.563729788	0.256198753	CAP2	1.335155912	2.00711064	SGK1	0.2304038	0	0	0	0	0	GRTP1	1.507332738	1.342371677	1.984922379	1.730004144	1.305107158	1.61002901
DDX5	0.765728591	0.680748639	ATP5F1A	1.298368542	1.225147295	CBWD3	0	0.29508612	ANKRD52	1.422102464	1.445026178	ARL17A	0.646115665	0.620578422	CAPG	1.279675205	1.291831447	SGPP2	0.638528749	0.305009257	0.483300451	0.152397306	0.707793123	0.344611092	GSK3A	1.428926694	1.352253549	1.530060314	1.314020153	1.326012709	1.539180648
DDX52	0.784321957	0.777424187	ATP5PO	1.525244906	1.310155746	CBWD5	0.790867484	0.703808466	ANKRD54	1.372817825	1.220142833	ARL17B	0.584249692	0.619010628	CASKIN2	1.220063739	2.13702856	SLC20A2	0.121337931	0.099243039	0	0.06294036	0.497204272	0.25231148	HABP4	1.624019115	1.640639325	2.076773738	1.843912353	1.589182438	2.27553328
DGKZ	0	0.711267606	ATP6AP1	1.211743172	1.309264687	CBWD6	0.126976285	0.133731618	ANKRD9	1.27471144	1.988921724	ARL4A	0.577012074	0.61135546	CAST	1.223563364	1.248274608	SLC2A11	0.788204733	0.767704413	0.709989041	0.408886921	0.82436985	0.815862027	HAUS2	1.216492178	1.345205509	1.339628236	1.314151087	1.224427744	1.789356516
DHRS7B	0	0	ATP6V0D1	1.518484822	1.281591124	CC2D2A	0	0	ANKS3	1.275479077	1.274552176	ARL5B	0.714192707	0.702495087	CCDC107	1.517993432	1.203105763	SLC2A12	0.607628467	0.636878695	0.407630482	0.491144175	0.519096348	0.537249042	HCFC2	1.357638412	1.276886376	1.888720978	1.3588935	1.98767001	2.459494788
DICER1	0	0	ATP8B3	1.253045073	1.254760652	CCDC113	0.685830603	0.677398905	ANO10	1.615471869	1.315257448	ARL6IP1	0.580957736	0.653373967	CCDC12	3.062437396	12.67973856	SMIM14	0	0.691297209	0	0	0	0	HECTD3	1.28631015	1.533583482	1.686476313	1.652436988	1.429312625	2.594365754
DLG3	0	0	ATXN10	1.414149896	1.23413437	CCDC14	0.735100053	0.758054599	ANO5	1.237896518	1.633473957	ARNTL2	0.575281088	0.758899555	CCDC124	4.331045004	2.969584875	SMTN	0.809021816	0.75141731	0.66755104	0.784106783	0.648587794	0.624553531	HEMK1	1.758895662	1.327275238	1.949325047	1.505526587	1.467956594	1.57834209
DLGAP5	0.819933823	0.720966292	ATXN7L3	1.414697283	1.206077966	CCDC163	0.735946288	0.678251425	ANO9	1.5003157	1.590762811	ARPC5L	0.75004371	0.723691802	CCDC186	1.397310255	1.392210758	SRMS	0.361811971	0.636434527	0.332815775	0.524203707	0.33906529	0.625997241	HS6ST2	77.6	277.8	377.2	218.4	567.8	602.1
DNPEP	0	0	AUP1	1.296422447	1.258684628	CCDC28B	0.291281482	0.702134042	ANP32C	1.590681952	1.543071828	ARRDC3	0.805498508	0.827512084	CCDC191	1.376159237	1.440081271	TIMP3	0.489809785	0.629690965	0.345602514	0.468509838	0.177053775	0.349268813	IFT20	1.473183024	1.261322879	1.860490716	1.322486088	1.233859416	1.7170859
DOC2A	0	0	AXIN2	1.401278945	1.570018287	CCNB1	0.808796209	0.828792255	ANXA6	1.33629932	1.416825363	ARSD	0.699030803	0.722835877	CCDC92	2.42064103	2.05627663	TMEM126A	0.803824462	0.810222563	0.73788806	0.747231276	0.762216508	0.825602456	IGFBP6	1.247464816	1.778959529	1.813433057	2.177452185	1.24548063	1.748170832
DOCK9	0	0	B3GNT3	1.414681417	1.298589329	CCNB3	0.616462213	0.785054533	AP1B1	1.837901633	1.207727424	ART5	0.819074334	0.801778211	CCDC93	1.573582329	2.346772124	TMEM200A	0.490800217	0.641623305	0.464061569	0.330598917	0.117021775	0.259300556	IGHMBP2	2.48768145	1.865922778	1.506241244	1.247910253	1.310578487	1.610749846
DPYSL2	0.785561306	0.749340804	B3GNT9	1.56249792	1.794917227	CD24	0.098279159	0.35976112	AP1G2	1.40566983	1.298977881	ASB14	0	0	CCPG1	1.294566857	1.763638331	TNFSF9	0.670738526	0.659743029	0.47339268	0.620097843	0.385397698	0.395033589	IL17RD	1.393333807	1.621563328	1.536732807	1.629411153	1.542777896	2.044462346
DSC3	0.752422013	0.581216896	B3GNTL1	1.295513829	1.308645397	CD33	0.070299526	0.073572663	AP1M1	1.370838034	1.247584247	ASB3	0.757864171	0.819385499	CD151	1.29624986	1.58825106	TRIM39-RPP21	0.460204535	0.416633943	0.457092041	0.051441137	0.776789684	0.094557449	INPP4B	2.49091395	2.28696845	2.566274719	2.577229081	15.05718867	10.05788752
ECH1	0.617871853	0.784956919	B4GALNT3	1.240897883	1.223693837	CDC123	0.798773006	0.757639051	AP1S1	1.288572199	1.975473575	ASF1A	0.598351141	0.597181727	CD59	3.883948422	5.272577997	TUFT1	0.711974278	0.679557009	0.506220623	0.567559197	0.610766286	0.629462417	INPP5E	1.439615973	1.285837822	1.621228211	1.7068439	1.210670195	1.317047981
EFCC1	0	0.592957746	B4GALNT4	1.447125484	1.713826367	CDC6	0.755356116	0.816431045	AP1S2	1.440307588	1.206371077	ASNS	0.555666926	0.31452346	CD63	1.440657948	1.7469897	TXNRD1	0.701482596	0.474984332	0.777779025	0.639531489	0.542633048	0.510932312	INSIG1	1.369044757	1.527602715	1.496211315	1.928477923	1.215230309	1.59890973
EGR1	0.793840024	0.67341559	B4GALT4	1.310214287	1.302358824	CDH1	0.757178719	0.519165656	AP2A2	2.040364351	1.922929645	ASPH	0.803799752	0.667970656	CD68	1.226524202	1.466005648	UBAP2	0.749023594	0.649061103	0.620765705	0.714160948	0.806817563	0.726374478	ITGA7	1.397321607	1.311333402	1.960703578	1.276717885	1.292064761	1.255611701
EIF4E	0.7489146	0.668844198	B4GALT6	1.346291335	1.220287005	CDIP1	0.497343318	0.616198982	AP2M1	1.493643324	1.576250585	ASPM	0.530426236	0.469367028	CD83	1.275470474	2.296796797	VCAN	0.54315574	0.522941939	0.498445635	0.279079525	0.684426022	0.636257681	ITGBL1	6.122425629	7.430283224	3.008390542	5.473856209	38.64683448	80.45533769
EIF4G2	0.79760985	0.691521821	B4GALT7	1.288091158	1.296168197	CDK20	0.757983392	0.737218805	AP3B1	1.386013311	1.32162659	ASTN2	0	0	CDC42BPG	1.70447225	1.790676995	VCPIP1	0.790017033	0.531072832	0.807069058	0.590325406	0.699772804	0.499676186	JAZF1	1.546584277	3.862855799	2.025128733	5.653258057	2.159148644	9.631380852
ELF1	0	0	BAG4	1.20067473	1.210595226	CDKAL1	0.734063282	0.703875368	AP3M2	1.711375353	1.615513787	ATAD2	0.60932522	0.70301976	CDK5	1.269499065	1.472103372	WASHC1	0.500073039	0.555601375	0.42304134	0.645635739	0.44660856	0.8	JCAD	1.583457583	1.776052263	2.374921028	2.01003662	2.14131561	2.132307066
ELMOD3	0.805258693	0.778947737	BAG5	1.474680589	1.328538513	CDYL	0	0	AP4B1	1.227220683	1.47127664	ATF3	0	0	CDK6	1.216410117	1.295978012	WLS	0.750303317	0.806144041	0.659176624	0.646298679	0.593963883	0.674401381	JOSD2	1.538207996	1.435578792	1.536663591	1.755475205	1.312483039	1.701988121
EMC10	0.751915408	0.732309922	BAHD1	1.450059201	1.297126462	CENPF	0.763603276	0.728486746	AP5B1	1.456193061	1.588729706	ATF4	0.600348431	0.488601166	CDKN1A	1.666350993	2.066396066	ZHX2	0.763792346	0.647515695	0.620752064	0.537343315	0.747876309	0.654700006	KAT6A	1.678376107	1.511679975	1.588682688	1.386079135	1.252039469	1.64311783
ENC1	0.700382592	0.787253832	BAX	1.33051873	1.399824848	CENPK	0.699928888	0.696451089	AP5S1	1.513313844	1.589182874	ATF5	0.601031233	0.411215271	CEP104	1.545072577	3.05751399	ZNF222	0.60526953	0.526198734	0.611183549	0.532182478	0.417632157	0.272781029	KCNH2	1.860598876	2.305373365	1.987794169	2.382327779	1.630049175	2.093086732
ETFB	0	0	BBOF1	1.471098404	1.214560021	CENPQ	0.529207306	0.643257969	APBB1	1.442348327	1.306532299	ATF6	0.810299697	0.55007138	CEP83	1.416302028	1.296831183	ZNF350	0.436759939	0.260893903	0.499151066	0.421713492	0.577859364	0.52686439	KIF1C	1.492800022	1.389190998	1.930923619	1.879322802	1.445740719	2.024063947
ETS1	0	0	BBS2	1.225025238	1.205754487	CENPW	0.538867535	0.458576768	APEH	1.417950438	1.60288762	ATF7	0.686470915	0.690958723	CFLAR	1222.9	361.2	ZNF493	0.435264062	0.284745532	0.645799982	0.51775518	0.510828723	0.439996532	KIFAP3	1.994075829	1.554123984	2.314599217	2.018877389	1.541263136	1.36711902
ETV3L	0	0	BCAM	1.229616342	1.976783265	CEP44	0.694916162	0.512893718	APLP1	1.374981532	1.574512862	ATF7IP2	0.710665309	0.712222406	CHD3	1.274844565	2.28920373	ZNF550	0	0	0	0.069454936	0	0.11167654	KIFC2	1.457268112	1.968028922	1.937024072	2.301773027	1.324236442	2.122477208
EXOC6B	0.822290734	0.754844996	BCAP31	1.341883063	1.269056801	CEP95	0.684775069	0.818867872	APOBEC3F	1.624960331	1.657555553	ATG10	0.697682336	0.830140741	CHORDC1	1.246868799	1.372095142	ZNF595	0.114610644	0.359466977	0.432088256	0.367423507	0	0	KLHL35	1.984634629	1.651344934	2.153272239	1.90251759	1.255453731	1.310420708
F12	0	0.414340449	BCAR1	2.042943533	1.429824353	CEP97	0.819100037	0.686105507	APOBEC3G	1.656051896	2.041125313	ATG4A	0.678086548	0.549009472	CHPF2	1.302746805	1.938122301	ZNF772	0.659870014	0.555257052	0.568115203	0.400170961	0	0.392111369	KLK10	2.993795753	2.210025025	2.805048001	3.268639168	2.140183072	1.822820037
FADS2	0	0	BCAS1	1.579710145	101	CFAP44	0.16178785	0.287659201	APOBEC3H	2.307258801	2.661166447	ATG9A	0.760621545	0.675729498	CIAO1	1.461502145	1.823950759	ZNF773	0	0.481873374	0.366381614	0.303035559	0.583377873	0.556981787	KLK5	1.651100597	1.662388944	4.44517589	3.738071734	1.347665089	2.64165844
FAM156B	0	0	BCKDK	1.281739871	1.25567315	CFD	0.461172599	0.426890934	APOD	1.594147816	1.933432748	ATN1	0.750139303	0.78669211	CISH	1.280160345	2.007413983	ZNF804A	0.521094378	0.652820778	0.354750674	0.280300931	0.302081711	0.362671518	KLK6	1.384341804	1.960096357	1.653212598	1.587996058	1.619846507	2.153654836
FAM174A	0.757474242	0.750129878	BCL11A	1.452661779	1.808465608	CFL2	0.668201643	0.582722493	APPL1	1.432474744	1.318834678	ATP11C	0	0	CKAP4	1.233873348	1.532655578								KMT2B	1.452673861	1.53920198	1.462587663	1.52431894	1.418715939	1.92382939
FAM177A1	0	0.824618736	BCL2	1.241664769	1.350190272	CHAC1	0.80503518	0.329432163	ARC	1.285167739	1.567312135	ATP1A1	0.801285032	0.812769709	CLDN23	1.224837	2.047579519								KRT15	2.723965763	3.188203018	3.057952924	3.356378601	1.557596291	4.624965706
FAM47E-STBD1	0.564995288	0.2985817	BCL3	1.407002086	1.667760221	CHCHD5	0.817040087	0.790727183	ARCN1	1.551302163	1.21814261	ATP1B3	0.605680353	0.626873041	CLIC3	1.682753061	3.13588035								KSR1	1.895314382	1.520515144	1.938287307	1.848692726	1.394712274	2.175608335
FAM71E1	0.751915408	0.732309922	BCL7B	1.38498942	1.262518035	CHMP4A	0.81610494	0.824539185	ARF1	1.413188169	1.571386607	ATP2A2	0.738721939	0.801210797	CLIP2	1.200292761	1.507656809								LAMC1	1.277637392	1.201253561	1.56591127	1.35135082	1.432480264	1.354966107
FAM72A	0.478610231	0.409013223	BCL7C	1.421482225	1.384589302	CHN1	0.630122687	0.721130016	ARF5	2.163471147	2.023939335	ATP5IF1	0.627915028	0.580676163	CLMN	1.303234237	1.453501311								LDLRAP1	1.396268127	1.284736702	1.530719509	1.318002141	1.245887839	1.713806123
FAM72B	0.636863034	0.508644032	BCR	1.559582837	1.575705848	CITED1	0.520610732	0.792862642	ARFGAP1	1.777883477	1.702785072	ATP5MC2	0.801540586	0.685342783	CLPP	1.234487867	1.704231574								LGALS9	129.4	101	308.6	58.2	393.1	321.1
FAM72C	0.42094182	0.603857567	BDNF	1.677641665	2.002358302	CLEC11A	0.244472183	0	ARFGAP3	2.017842135	1.702359686	ATP6AP1L	0.729952091	0.588087299	CNN2	1.521594661	1.98920412								LGALSL	1.399442934	1.282535465	1.27377147	1.400849945	1.41063731	1.963406286
FAM72D	0.634118547	0.704944863	BEND7	1.356101564	1.459525875	CMC2	0.445233731	0	ARFGEF1	1.425329809	1.425858354	ATP6V1B2	0.809706293	0.663983747	COBL	1.331747145	1.82168064								LIF	7.591913241	5.52790682	9.207189717	8.801117619	11.22787522	8.864202518
FANCD2OS	0	0.828740157	BICD2	1.233011668	1.218648727	CNOT10	0.791429707	0.675264895	ARFGEF3	1.209540733	1.260072344	ATP6V1C1	0.756036741	0.68759059	COG3	1.276571429	1.361336032								LMCD1	1.340335882	1.406029757	1.661951484	1.429774024	1.945554686	2.200330015
FBF1	0	0	BIRC2	1.517820321	1.332910836	COG4	0.743045439	0.770906948	ARFRP1	1.427788941	1.657322299	ATP6V1E1	0.794556438	0.710473204	COG7	1.338588598	1.928679333								LMF2	1.211950773	1.374493497	1.422938796	1.657824048	1.202500618	1.76964928
FER	0.708934425	0.551810135	BMP1	1.310040987	1.275772531	COIL	0.813685868	0.74401306	ARHGAP1	1.252465902	1.227507756	ATP6V1G1	0.826124997	0.703128586	COMMD1	1.365772885	1.417084613								LRRC3	1.41112625	1.712122105	1.536590998	2.684454004	1.681084451	2.18807826
FERMT2	0.576222384	0.698352909	BMP2K	1.424623334	1.234447142	COL17A1	0.776793987	0.469686112	ARHGAP12	1.944523735	1.702260694	ATP8B3	0.624770825	0.818218482	COMMD3	1.243955793	1.309132506								LRRC57	1.216492178	1.348120121	1.336854561	1.316998415	1.224427744	1.796462004
FGD3	0	0	BMP7	1.205825952	1.298302687	COL4A5	0.609286952	0.560243476	ARHGAP21	1.259914683	1.510291355	ATRIP	0.709254575	0.769032599	COMMD3-BMI1	1.243955793	1.309132506								LSM14B	1.52610146	1.303139438	1.491916847	1.392468689	1.265818056	1.686941275
FGF2	0.636760525	0.538132321	BMP8A	1.49859728	1.217357094	COMT	0.684420772	0.546446845	ARHGAP44	1.362018139	1.43461122	ATRN	0.741676512	0.775717508	COMT	3.19840213	1.277885162								LTBR	1.579430393	1.507151158	1.522030033	1.584365073	1.584197728	1.816208259
FGF9	0.539196976	0.755455697	BOD1	1.492213911	1.209370811	COQ3	0.64997787	0.820545601	ARHGAP45	1.455764638	2.505201924	ATXN2L	0.741447511	0.685616062	COQ6	1.214749006	1.686516521								MAML2	1.575429894	2.336891131	1.939484127	2.586260431	2.022089947	4.362183841
FN1	0.31958086	0.198710633	BOLA3	1.384222277	1.369189974	COX11	0.829717777	0.740440022	ARHGAP8	1.378344629	1.344541462	ATXN7L1	0.754005535	0.797629335	CPD	1.246554837	1.36544005								MAN1C1	1.307306895	1.682374666	1.585955512	1.464435268	1.237664061	2.211978016
FOCAD	0.628845435	0.551221329	BOP1	1.285121102	1.246579929	COX16	0.730219144	0.684732876	ARHGDIA	1.257991063	1.378422359	ATXN7L3B	0.629712405	0.503506482	CPM	1.40317687	1.986359599								MAN2B2	1.200138067	1.314598163	1.288727811	1.582540466	1.20178501	1.78224916
FUT8	0	0.319908815	BRD3OS	1.853518527	1.276917564	COX5B	0.805667165	0.828010375	ARHGEF1	1.926868613	2.194292211	AURKAIP1	0.815013875	0.710008187	CPNE7	1.286115271	1.583284559								MAP1LC3B2	1.726865103	1.639606474	2.393903075	2.288083148	2.235586075	1.974531895
FUZ	0.827569006	0.822662266	BRF2	1.228000826	1.334263492	CPA4	0.723241765	0.779602486	ARHGEF10L	1.265204955	1.345134396	AURKB	0.635246377	0.607610253	CPNE9	1.55611639	1.42325228								MAP3K12	1.296262809	2.661431065	1.232787489	2.058956053	1.433393611	3.451689672
FYCO1	0	0	BRMS1	1.233533468	1.437615934	CPE	0.822110102	0.76718969	ARHGEF28	1.91420434	1.434463696	AVL9	0.829353107	0.752240275	CPSF1	1.353750054	1.649439989								MDK	1.697826913	1.860839412	1.241078747	1.781681215	1.274844565	1.679899558
GAPDHS	0.789855072	0.666117337	BRWD3	1.554620158	1.235904327	CPNE9	0	0.553191489	ARHGEF3	1.51573433	1.474774993	AXL	0.711932438	0.781647028	CPT1B	2.156346431	7.206463196								METTL26	1.498282948	1.64368665	2.472398735	1.776540186	1.754846953	2.588394438
GAREM2	0	0	BTBD10	77.6	75.7	CPT1C	0.647891194	0.74974684	ARHGEF40	1.849381452	1.599451934	AZIN1	0.817077847	0.668970154	CRABP2	1.24052951	1.32525379								MGAT5	1.264331458	1.23514432	1.514731174	1.252313644	1.298547192	1.332055616
GCH1	0.798739441	0.780146786	BTBD11	1.220018848	1.383358962	CPVL	0.32259932	0.180051813	ARID1A	1.480390901	1.311830975	B9D2	0.681767529	0.704290419	CRYBG2	1.850809514	1.841236841								MGLL	2.129047286	2.396100835	2.62052178	2.678027677	2.085697647	2.916525694
GCNT3	0.534578961	0.397029645	BTBD3	1.416831747	1.35682384	CRBN	0.723002412	0.597235833	ARID5A	1.221793349	2.076023392	BABAM1	0.795353799	0.82928079	CRYL1	1.213171268	1.684355605								MICALCL	2.34355071	1.556972911	1.834396215	1.722230185	2.875128574	2.243657733
GDAP1	0.696591146	0.677709581	BTBD9	1.272617107	1.222959659	CRISPLD2	0.695067306	0.754033434	ARL16	1.465880976	1.59447515	BAG2	0.65097099	0.663582016	CSPG5	1.346503326	1.35796446								MINK1	1.452020377	1.491910432	2.09799975	1.928811804	1.515720215	1.487202304
GEMIN8	0.810349244	0.785541898	BTN3A1	1.405668211	1.454167749	CROCC	0	0.572834646	ARL2	1.226152575	1.2785422	BAHCC1	0.46268143	0.432211179	CST3	1.340061541	1.536593127								MOCS1	1.303326103	1.488275448	1.551587964	1.356987473	1.243019634	1.915025129
GFI1	0	0	BTN3A3	4.09032322	5.954325867	CSTA	0.686157518	0.414528026	ARL4C	1.690919443	1.850111076	BAMBI	0.437010204	0.583562933	CTDSPL	2.169445411	1.807426598								MROH1	1.418810343	1.354167781	1.605021112	1.581472114	1.34793454	1.731388445
GFY	0	0	C11orf45	1.217758493	1.299201255	CTBP2	0.684420772	0.371177294	ARL5A	1.279959565	1.243502688	BAX	0.639590571	0.708699521	CTU2	1.406251231	2.072202166								MROH6	1.241826074	1.525442149	1.26294228	1.502119427	1.318967208	1.554870625
GJA3	0.552294327	0.794819227	C11orf95	1.386146393	1.539121611	CTH	0.786648415	0.631644733	ARL8A	1.463683249	1.591847371	BBS10	0.714729326	0.533808082	CUEDC1	3.528316558	2.765733417								MRPL21	2.479106984	1.862661358	1.50169734	1.248694379	1.303345333	1.609111937
GJB2	0.797429785	0.655694939	C12orf75	1.260841893	1.450731633	CWF19L1	0.778723351	0.799072608	ARMC2	1.334018158	1.588083042	BBS4	0.69270232	0.740821071	CUL9	1.300235018	1.607168496								MRPL36	1.497261259	1.379425059	1.394389072	1.595826123	1.213161475	1.484639822
GLIPR1	0.153857589	0.378672796	C15orf40	1.438264609	1.299437468	CWF19L2	0.725063112	0.625734254	ARMC3	1.204600029	1.337607472	BBX	0.786560667	0.81458594	CXXC1	1.51076033	1.835729341								MRPS6	1.664983559	1.332302041	1.918984289	1.435983524	1.507524053	1.574406798
GLS	0.665661181	0.812904097	C16orf91	1.232565758	1.219113292	CYCS	0.831856519	0.767270502	ARMC6	1.242541341	1.405143573	BCAS2	0.630716639	0.578992951	CXXC5	3.024551464	1.245901639								MTRNR2L2	1.229665772	1.99301784	2.309355399	1.787325912	4.104534738	2.439317155
GMCL2	0	0	C19orf12	1.375057399	1.386475984	DAAM1	0.720388317	0.659592205	ARMH3	1.475179872	1.357152106	BCAT2	0.726131838	0.742489406	CYB5A	1.340309461	1.981085794								MVP	1.501348279	1.992413527	1.994836003	2.247417599	2.337616102	2.572092924
GNB5	0.122127794	0.728708791	C19orf25	1.534466795	1.25813966	DAB2	0.789690775	0.675659508	ARPC4	1.332622162	1.329746037	BCKDHB	0.769128317	0.832027311	CYB5R2	1.354715917	1.308370221								MYL9	1.655706539	1.632117687	1.904275314	1.784176082	1.726760137	2.043153597
GOLPH3L	0.803661292	0.586207122	C1orf198	1.242161492	1.376546448	DACT1	0.631445295	0.709930417	ARPC4-TTLL3	1.332622162	1.329746037	BCL11B	0.614739986	0.543523065	CYB5R3	5.815579228	3.059912854								MYLK	1.296899571	1.575401448	1.614746937	1.744169579	1.373701683	1.939206012
GPR15	0.824901236	0.698723404	C20orf27	1.374911958	1.39229275	DAPK1	0.695072733	0.708950089	ARRB2	1.48085444	1.394210845	BCLAF1	0.717545184	0.578731138	CYB5R4	1.254286352	1.754925014								MYO1C	1.275087477	1.413593974	1.83722839	1.292969871	1.886776967	1.914849354
GPR75-ASB3	0	0.830046948	C2CD2	1.439192766	1.453297853	DBF4B	0.718228064	0.604440958	ARRDC1	1.512898009	1.77723353	BCOR	0.624536167	0.680963571	CYP26B1	2.479131886	441.5								MYORG	1.233241622	1.662071133	1.709945424	1.743959943	1.229299535	1.901742411
GPR82	0	0	C4orf48	1.25663588	1.598672322	DDIT3	0.730652584	0.503841866	ARSA	1.314299259	1.523643478	BDH2	0.38608663	0.698661928	CYP2R1	1.213702694	1.513178078								NAA10	1.479386483	1.529261312	1.541626989	1.494574021	1.314338679	1.398221789
GRB10	0	0	C7orf25	1.345214605	1.390631485	DDX27	0.67381006	0.678108036	ARV1	1.433939516	1.278320868	BEGAIN	0.642521044	0.803152295	CYP4F22	1.201099969	1.688606889								NATD1	1.966791644	1.840418238	1.670058918	1.638369901	1.51000633	1.874871443
GREB1	0	0	C7orf50	1.251878532	1.347925955	DDX5	0.532632814	0.747884288	ARVCF	1.205024833	1.826837975	BEX2	0.745514895	0.597477862	CYP4F3	1.397536114	2.333455536								NBL1	1.648655082	2.550069958	1.898179005	2.117929242	1.767436325	3.530181891
GSTM1	0	0	C8orf33	1.272527298	1.222074089	DDX52	0.755405999	0.768568601	ASAH1	1.292220094	1.395863026	BFAR	0.818945111	0.670217227	DAPK3	1.435219327	1.397413545								NCOA1	1.304813387	1.216362121	1.297576717	1.268064351	1.339334677	1.812095787
HAS3	0.326788436	0.624712688	C8orf58	1.598306144	1.386747095	DHRS7B	0	0	ASAP2	1.201705703	1.558385512	BICD1	0.770254392	0.72179074	DBNDD1	4.245686513	2.77818062								NDUFS7	1.263824963	1.491765786	1.843689271	1.578411522	1.68519655	2.028002066
HBEGF	0.664741064	0.782134849	C8orf76	1.369142339	1.378485323	DICER1	0	0	ASB14	102.8	65.5	BICRAL	0.511165535	0.538543636	DBNL	1.293342927	1.88122788								NENF	1.384746246	1.225124774	1.743475338	1.555714842	1.210225536	1.502539733
HEXB	0.71345162	0.789564004	CA11	1.256230959	1.267251527	DISC1	0.586102579	0.689508416	ASB6	1.215814241	1.309941691	BIN3	0.809367292	0.785610665	DCTN1	2.707705934	1.311546841								NIPSNAP3A	1.517150433	1.551890059	1.701814209	1.431147526	1.3556253	2.014471116
HEXIM2	0.587265923	0.693550595	CA2	1.397149356	1.752830801	DLL4	0.678148524	0.703914361	ASCC1	1.387131809	1.439830525	BIRC5	0.622200198	0.672366023	DCUN1D2	1.32488448	1.43627755								NOL4L	1.629392971	1.881817727	2.28014974	2.828825676	2.100203311	3.210718392
HMOX1	0.828369058	0.753753571	CABLES2	1.369503767	1.205144041	DNAJB11	0.711794058	0.778490673	ASPHD1	1.588905898	1.624705328	BMP4	0.786768269	0.679490484	DDN	1.200236716	1.677281256								NOTUM	1.716587636	2.101542894	3.538856691	2.944418626	1.284861257	2.126545218
HNF4A	0.04045004	0.017594013	CACNA1H	1.274130641	1.293563688	DNAJC15	0.802838327	0.728516196	ASPHD2	1.233865871	1.625491652	BMPR1A	0.792218832	0.711635816	DDX51	1.251809714	1.539813139								NT5DC2	1.363727803	1.425363759	1.371582451	1.521265904	1.270048097	1.717627173
HNRNPA3	0.819580911	0.757905111	CAD	1.2636891	1.336802098	DNAJC22	0.455840515	0.768134715	ATAD3A	1.200788774	1.303066996	BNIP2	0.777668781	0.604637205	DDX58	1.507119242	1.386694898								NTHL1	1.513055971	1.542131711	1.40166767	1.747357842	1.348259527	2.017096006
HNRNPCL1	0	0	CALM3	1.364376738	1.262326284	DNPEP	0	0	ATAD3B	1.233208239	1.369587442	BNIP3L	0.640085639	0.70827737	DDX59	2.320637733	2.958230958								NTMT1	2.750886455	1.755669571	2.774656581	1.675273936	1.707430463	1.31138854
HOXB4	0.265340981	0.331133113	CALR	1.381945748	1.3235758	DNTTIP2	0.728168012	0.78650089	ATF1	1.233045342	1.235491978	BOLA2	0.636843233	0.60053343	DENND1B	1.253062515	1.241239204								NUDT14	1.499780406	1.559678756	2.344879077	1.678715557	1.509032617	1.952454767
HOXB8	0.27699578	0.133647403	CALU	1.853257141	1.524792347	DOC2A	0	0	ATG101	1.366348584	1.330082626	BOLA2-SMG1P6	0.636843233	0.60053343	DENND2D	4.184714795	1.274392478								OSBPL7	1.26523137	1.405749843	1.248084582	1.406687209	1.208632576	1.6491459
HSD3B7	0.814041398	0.744094488	CAMK4	2.149504066	2.047065488	DOCK9	0	0.713507625	ATG4D	1.446928252	1.38612474	BOLA2B	0.629441028	0.618228494	DFFB	1.557013989	3.045286047								PACS1	1.491627796	1.493333909	1.76395168	1.538874747	1.211960292	1.450468137
HSPA2	0	0.355399061	CAMSAP1	1.35224164	1.581391278	DPP4	0.365585719	0.499003208	ATIC	1.277244869	1.271973812	BORCS5	0.760915879	0.831341364	DGKD	1.540353785	1.952720327								PACS2	1.362214358	1.686233141	1.349320483	1.770263274	1.356548583	1.839239949
HYPK	0.82293918	0.732580437	CAMSAP3	1.372618194	1.23262698	DRAXIN	0.346737098	0.687461523	ATL3	1.44814504	1.519012675	BPTF	0.701052589	0.591884647	DHCR7	1.299120981	1.66073468								PACSIN2	4.082308926	2.590076895	11.18225548	5.51995606	6.769909139	5.144269498
ICAM1	0.443699694	0.45945079	CANT1	1.684037707	1.273208057	DSE	0.50470886	0.382624547	ATP11A	1.24662799	1.264329744	BRCA1	0.589629706	0.431959254	DHX32	1.553579369	1.311546841								PCSK7	1.614273799	1.41216474	1.771376577	1.429605732	1.696426916	1.950787042
ICAM3	0	0	CAPN15	1.442597571	1.29537624	DTNA	0	0	ATP1A3	1.316167686	1.367497439	BRCA2	0.773586615	0.766833048	DHX37	1.391534947	1.259174559								PDGFA	1.410993021	2.045496062	2.132504928	2.644188423	1.314680891	2.22515622
IFI35	0.739826736	0.556666255	CAPN6	7.487484812	5.781581838	DYSF	0	0	ATP2A3	1.288390472	1.699705313	BRIP1	0.519467677	0.473222644	DICER1	174.7	120.4								PDGFB	1.415808852	1.270864244	2.939490795	2.865498274	1.7039953	1.655081113
IGF2BP3	0.751488915	0.529454784	CARD10	1.382702031	1.66209366	ECH1	0.426707995	0.4531054	ATP2B4	1.363799157	1.336408197	BRSK1	0.52371355	0.384932164	DMPK	1.639276405	1.851486653								PDIA5	1.498636525	1.573885052	1.398277931	1.739534469	1.357816803	1.348821304
IGSF9B	0.746662055	0.796784166	CARD19	1.657566955	1.484159815	EFCC1	0	0	ATP5MC2	1.24939785	1.381567215	BRSK2	0	0	DMXL2	1.214000735	1.656738667								PFKFB3	1.355752634	1.345113646	1.256917072	1.490779894	1.299630317	1.697346572
IL1R1	0.804467291	0.823398454	CASKIN1	1.703086401	1.606579354	EGR1	0.582815497	0.585589158	ATP5ME	1.235412175	1.200529839	BSG	0.560453941	0.457050829	DNAJC17	1.258889729	1.467590044								PGGHG	1.614433475	1.708855552	2.055036859	2.420523909	1.322686974	2.25045445
ING4	0.726707916	0.747809336	CASKIN2	1.213093107	1.439977444	EGR3	0.404822592	0.44864948	ATP5PD	1.305504814	1.454340697	BTC	0.776171161	0.81692148	DNAJC5	1.317399388	1.536308766								PGS1	1.432894533	1.220337152	1.345666202	1.318334508	1.228114191	1.600299393
INO80B	0.68255831	0.746403684	CASTOR1	1.939952222	1.416605823	EIF4A1	0.788975629	0.808075001	ATP6V0A1	1.972458312	1.422615732	BTF3L4	0.74404912	0.323285786	DNAJC6	349.4	280.9								PHF20L1	1.32084312	1.420194184	1.489528283	1.268533019	1.335804463	1.342616908
INTU	0.723688335	0.681652879	CAVIN3	1.308018465	1.450655845	EIF4E	0.653827488	0.724913709	ATP6V0D1	1.433282719	1.458348535	BTG1	0.807067318	0.729380037	DND1	1.277432674	1.740014356								PIK3CD	1.294713814	2.614631768	1.676779177	2.752662367	1.287034557	2.784573271
ITM2C	0.786356734	0.771421301	CBARP	1.213980647	1.589753636	EIF4EBP3	0.379093293	0.44834854	ATP8B3	1.459380276	1.401166053	BTN2A2	0.692240083	0.708917905	DOCK3	1.220702749	1.363388549								PIP5K1C	1.913585267	1.304405929	2.608682133	1.601380902	1.378952404	2.0481291
JMJD1C	0.80414918	0.660785425	CBFA2T2	77.6	101	EIF4G2	0.691758898	0.729352	ATXN10	1.470075455	1.671380022	BTN3A1	0.803407356	0.486399636	DPH7	1.433216911	1.343027266								PITPNM1	1.231256614	1.884813833	1.828566836	2.137753916	1.339825593	2.826779157
KBTBD8	0.66645177	0.814643399	CC2D2A	6.650132861	2.134741784	ELF1	0	0.572834646	ATXN1L	1.350959324	1.203652252	BUB3	0.581383594	0.56818914	DPP7	1.226075701	2.267066538								PLPP2	1.482000779	1.481481481	1.367242555	1.65518422	1.499991881	1.793596868
KCTD7	0.654417675	0.750061978	CCAR1	1.290721977	1.236644127	ELMOD3	0.754924749	0.742415045	ATXN2L	1.209160157	1.383209725	BYSL	0.796086333	0.74440249	DPP9	2.656690998	2.646239137								PNPLA6	1.287695048	2.531117397	1.256102601	1.874728901	1.618268614	2.091230552
KIAA0513	0.394736842	0.552818829	CCDC115	1.355385399	1.206901309	EMC4	0.553779993	0.727815406	ATXN7L3	1.563603073	1.588951633	BZW1	0.66461206	0.575974933	DUSP10	2.012573225	1.769115657								POFUT2	1.404246655	1.28038872	1.501879599	1.252403358	1.216628996	1.613826614
KIAA1143	0.709796444	0.731862704	CCDC130	1.406744559	1.204021494	EML2	0.737220626	0.783700973	AUNIP	1.35292934	1.215472698	BZW2	0.678654464	0.707221442	DUSP22	1.24176433	1.778729298								POLDIP2	1.388176718	1.309146019	1.468337371	1.346891084	1.280056902	1.556170272
KIF15	0.707422363	0.733637937	CCDC40	1.210464606	1.357876472	EML6	0	0	AUP1	1.255154328	1.429144738	C11orf1	0.763448732	0.812571024	DYNC1I2	1.763081953	1.607814761								POLR2C	1.466325618	1.308849399	1.557606902	1.433322526	1.208422643	1.374385171
KIF23	0.756511462	0.805264206	CCDC57	1.407955923	1.241438933	ENC1	0.607378963	0.665023276	AVEN	1.325633636	1.415643056	C11orf58	0.728097478	0.6468789	DYRK4	1.321387014	1.563679952								POMT1	1.225274562	1.395444763	1.357689217	1.292969871	1.416946933	1.785294118
KIF4A	0.713384549	0.825438983	CCDC59	1.75297841	1.23670979	EPB41	0.610987602	0.807287838	AXIN1	1.354072913	1.728842562	C12orf57	0.729613373	0.691848721	ECHDC1	1.648405162	1.616858073								PPARA	1.54952919	2.843521573	1.722452396	3.137460379	1.224691358	3.06391099
KLF4	0.486469695	0.447388377	CCDC6	1.22246283	1.299311905	EPHB3	0.529642898	0.537438615	AXIN2	2.031677437	1.864468265	C12orf60	0.808103307	0.747650014	ECHDC2	1.220363422	1.502370625								PPP2R1A	77.6	1.745640013	102.8	2.156630471	349.4	1.848963475
KLK1	0	0	CCDC71	1.417493487	1.220195582	EPS8L1	0.769263119	0.641351952	B3GALNT2	1.201643037	1.255181484	C14orf132	0.455595683	0.647980927	EDEM2	1.203740778	1.309097387								PPP2R5C	1.865662363	1.544567907	1.815255858	1.759765151	1.566618843	1.519190645
KRT7	0	0.099527233	CCDC85B	1.267306325	1.350429216	ERICH5	0.546412384	0.522607328	B3GALT6	1.237054956	1.525363572	C14orf93	0.739278797	0.730850494	EFCAB14	1.541715867	2.220177203								PRKAG2	1.252280276	1.256541583	1.325008278	1.409920215	1.336728243	1.55789258
L1CAM	0.687333924	0	CCDC88C	1.22060874	1.22467274	ERLEC1	0.693370246	0.627729006	B3GLCT	1.701734028	1.488782686	C16orf72	0.574967373	0.441117989	EHF	6.214317474	1083.7								PRKCD	1.383619435	1.534823793	1.754977377	1.783017674	1.398688489	2.349204903
LAMP3	0.490126249	0.703664842	CCDC92	1.602358447	1.263084009	ERP29	0.791248563	0.773452384	B3GNT3	1.399897837	1.365794645	C16orf87	0.788948062	0.820224774	EIF2B2	1.337026889	1.679908198								PRRX2	1.676682021	1.516501221	1.374930137	1.515851567	1.228997629	1.856686243
LCMT2	0.829260079	0.823032684	CCDC93	1.465553017	1.296523826	ETFB	0	0	B3GNT4	1.703015566	1.490138195	C17orf97	0.534472805	0.812286797	EIF4E3	1.575933791	2.301378647								PRSS22	1.60672292	1.542143494	1.56289571	1.48956289	1.500211809	1.984758506
LGALS8	0.212919152	0.276681287	CCDC96	1.301194061	1.378426846	ETFBKMT	0.82174916	0.650831519	B3GNT7	1.449460776	2.178515065	C19orf48	0.776712819	0.692084308	ELMO2	1.278066271	2.559414991								PSEN2	1.481519196	1.342455395	1.742141567	1.600778679	1.561976458	1.751507286
LMO7	0	0.277370926	CCND3	1.301548217	1.686838238	ETFDH	0.795700076	0.650267377	B3GNT9	1.740656927	1.798912571	C19orf54	0.579134083	0.518915845	ELOF1	786.2	441.5								PSMD13	1.344653867	1.440654543	1.433046769	1.426949092	1.262228683	1.83533431
LNPEP	0	0	CCNJ	1.295634601	1.347305426	ETV1	0.598610416	0.565637603	B3GNTL1	1.421762255	1.680656297	C1D	0.633205006	0.74239432	EMC3	1.314066106	1.553481967								PSME1	1.709997383	1.50463431	1.763691418	1.671079715	1.578360394	1.696437489
LNX1	0.772954009	0.790666176	CCSAP	1.401483265	1.311231846	ETV4	0.739094479	0.819299541	B4GALNT1	1.290634942	1.535774515	C1GALT1	0.663835407	0.725090588	EML4	1.433147031	1.306529991								PTK6	1.442511406	1.611405891	2.076158235	2.498015459	1.865417166	2.795083908
LONRF3	0.397261891	0.581684124	CD151	1.474368447	1.493183245	EXOC6B	0.743015388	0.758576912	B4GALNT3	1.45950879	1.271361538	C1QBP	0.596611012	0.713806286	ENDOV	1.263256422	1.686001121								PTPN18	1.405502287	1.274325136	1.802728419	1.562434289	1.383180859	1.90460423
LPAR5	0	0	CD276	1.33299389	1.672320201	EXOSC8	0.698885663	0.608961874	B4GALNT4	1.564418833	1.819073014	C1orf210	0.626853771	0.759428211	EPAS1	1.23435426	2.20247812								PTPRH	3.085845064	2.307510149	2.22152172	1.662973613	2.564988341	3.937922869
LTA4H	0.725531545	0.750096528	CD47	1.469739023	1.763078551	F5	0.670015488	0.76972139	B4GALT1	1.609679738	1.644730626	C1orf43	0.790095293	0.712525508	EPB41L1	1.801577538	2.977335165								PTPRU	1.638643589	1.66729521	1.86777346	1.267578054	1.388555281	2.25611923
LZTS1	0	0	CDC25A	1.329841068	1.339228416	FAAH2	0.806114652	0.399207215	B4GALT4	1.304015099	1.334471891	C1orf74	0.687585746	0.792793597	EPB41L4A	2.175351219	2.036761053								PWWP2B	1.428900557	1.300556054	1.751928847	2.014295964	1.435330047	1.468807175
MAGEA2	0.628613119	0.616860175	CDC42BPB	1.236406756	1.316165173	FADS2	0	0	B4GALT5	1.360563641	1.431587443	C20orf96	0.66939693	0.756648086	EPB41L5	1.322086935	2.021881695								RAB26	1.33771527	1.667562783	2.097990815	2.420999716	1.253654803	2.316132275
MAGEA2B	0.564785329	0.50576813	CDC42BPG	1.680020441	1.327540993	FAM13A	0.7207988	0.715361197	B4GALT6	1.595134069	1.264999883	C21orf58	0.686920886	0.709140127	EPHA2	1.287818554	1.21693194								RASA3	1.314502366	1.522804364	1.659746376	2.012926293	1.39650889	1.370759993
MAGI1	0.799615496	0.69414495	CDC45	1.309222401	1.215473221	FAM174A	0.528616177	0.687124851	B4GALT7	1.322479986	1.523830367	C2orf42	0.825581357	0.813939893	EPN1	11.17537313	4.847826087								RELA	1.234618279	1.249442517	1.384011055	1.439013475	1.277938162	1.638204121
MAGI3	0.659666794	0.814115623	CDK10	1.454254506	1.364652449	FAM177A1	0	0.713507625	BAD	1.269269368	1.212444384	C2orf68	0.764781735	0.682370311	EPN3	1.895977934	3.535256469								RELB	1.333835644	2.54507295	1.567795191	1.857312413	1.228618311	3.265226957
MAP3K2	0	0	CDK18	1.29960196	1.351415564	FAM53C	0.822253102	0.525382323	BAG3	1.22666186	1.427359053	C2orf69	0.663073036	0.829109638	EPS8L2	1.205101396	2.116685004								REXO4	1.552506214	1.476244185	2.046714377	1.77041356	1.45495118	1.588421589
MAP4	0	0.52575889	CDK2AP2	1.289515857	1.277195968	FAM72A	0.491662894	0.655032833	BAG5	1.230094694	1.581397578	C4orf46	0.735606707	0.642399706	ERCC6	1.217161914	1.375386999								RFNG	1.274035098	1.649089243	1.566694161	1.579185978	1.421178077	2.411962438
MAPRE3	0.691075515	0.207681756	CDK5R1	1.211288601	1.42257319	FAM83D	0.76573712	0.758963155	BAHD1	1.280553467	1.399836044	C5orf34	0.72343671	0.493003221	ETS2	1.361632984	1.650481736								RHBDF1	1.634236532	2.837988251	2.755243864	2.88209832	2.032770163	5.667525508
METTL16	0.828532758	0.78346455	CDK6	1.587189151	1.234105885	FANCD2OS	0	0.572834646	BAK1	1.351345664	1.635118942	C5orf63	0.700127712	0.71145701	EXD3	1.266969523	1.376187996								RHOC	1.578554326	1.328004126	1.949950953	1.806979543	1.409748225	1.738926136
MFGE8	0.825251512	0.72087123	CDKN1A	1.527274203	1.408936409	FANK1	0.727186689	0.817333502	BAP1	1.558955806	1.359634061	C6orf226	0.596686234	0.523094687	EXOC3	1.481445062	1.581656516								RIMBP3C	1.28375286	378.9	1.569412662	284	2.998474447	227.4
MFSD4A	0	0	CDKN1C	1.577803168	2.010999021	FARS2	0.374418326	0.472180102	BAZ1B	1.282644789	1.488212737	C8orf44-SGK3	0.704112023	0.477611738	FADS2	262	120.4								RIMKLA	1.598615588	1.700051271	1.8237662	2.124779697	1.271129969	2.804034351
MICAL1	0	0.181023362	CDKN2AIPNL	1.516646171	1.342582911	FBF1	0.522883295	0.358511221	BBOF1	1.545869287	1.43450292	C9orf43	0.709845993	0.773482682	FAH	1.610822341	1.982450797								RNF166	1.400674356	1.478298444	1.506919531	1.659982956	1.425610781	2.06695314
MILR1	0.448055893	0.447291788	CDON	1.546433018	1.524754017	FBXO16	0.719699115	0.355278327	BCAM	1.369480933	1.908684842	CAAP1	0.75517931	0.632287603	FAM114A2	1.465949299	1.816802604								RNF214	1.646051276	1.413319386	1.651943969	1.440609019	1.589594481	1.974980629
MMEL1	0.516644474	0	CDR2	1.203987264	1.2379631	FBXO21	0.804013726	0.772417582	BCAP29	1.326872012	1.220232843	CACNA1A	0	0	FAM120AOS	1.27129501	1.308790122								RPS6KL1	1.469166739	1.789644381	1.501569746	2.131948791	1.648002535	2.318179232
MNS1	0.267370187	0.242453654	CDR2L	1.510064283	1.300261227	FBXO32	0.829928446	0.680567338	BCAP31	1.329387867	1.556373012	CACUL1	0.65475311	0.813035884	FAM160B1	1.310416089	1.589320905								RTBDN	3.026751592	2.171437639	2.441626077	1.757664234	1.816485575	1.229292288
MOB2	0	0	CEBPA	1.362040885	1.264590029	FBXO8	0.703717809	0.534519346	BCAR1	2.520468135	1.724197161	CAD	0.744334561	0.832428844	FAM161A	1.331953793	1.459170099								RTN4RL1	1.314056697	1.816425196	1.617407783	1.553900984	1.517430653	2.556380259
MOB3B	0.496631422	0.664771207	CELSR1	1.254565821	1.381820387	FBXW9	0.662829048	0.753031055	BCAR3	1.365459163	1.417848201	CALCOCO2	0.625654712	0.34221102	FAM161B	1.214749006	1.686516521								RXRA	1.226147038	3.18735054	3.794387082	4.413869877	1.593703905	3.210686897
MPP2	0	0	CELSR3	2.046285182	1.931340894	FDFT1	0	0	BCAS4	1.212415504	1.600473346	CALCRL	0.63811876	0.23300826	FAM214B	1.324267043	1.275104861								S100A5	4.245444119	3.410785517	7.066267363	3.435716477	4.95386772	3.387081927
MRPL34	0.546852462	0.768935025	CEMIP	1.462496093	1.747913271	FERMT2	0.742991308	0.645966653	BCKDK	1.317518475	1.282952245	CALD1	0	0.201979534	FAM234B	1.434660388	1.817601769								SAMD11	1.529938547	2.240958176	1.74441935	2.4685036	1.387940543	2.734958862
MRPS22	0.802556973	0.793052239	CEP104	1.488540617	1.624143079	FGD3	0	0	BCL2	1.300215664	1.725846304	CALM2	0.760216589	0.683602752	FAM83F	1.208378396	1.252844226								SAMD12	1.442123074	1.536391398	1.720914656	1.220778377	1.472979801	2.185537002
MSX2	0.513938478	0.595284528	CEP170B	1.259977597	1.350499187	FGF2	0.253435089	0.229999164	BCL2L1	1.554761711	1.21639962	CAMSAP2	0.76313753	0.705907154	FASTKD1	1.376425543	1.842944505								SAT2	1.368145689	1.274114907	1.490704632	1.637526599	1.251481007	1.314846774
MYH15	0	0.827190827	CERK	1.213582613	1.752367923	FHDC1	0.757511206	0.710044624	BCL3	1.600012786	1.408658139	CANX	0.717195619	0.73137693	FBXL16	1.476710619	1.73615917								SATB1	4.679340938	3.119852399	2.898042529	2.192767528	2.460357696	3.199261993
MYLK4	0	0.438161318	CERS4	1.211025157	1.47579167	FLAD1	0.758868367	0.781692603	BCL7B	1.338378261	1.475620313	CAPN12	0	0	FBXL6	1.246656642	2.107596912								SCUBE1	1.44969874	2.211135797	2.400523401	2.632936107	1.302537886	2.351174847
MYO15B	0	0.827190827	CFAP45	1.208121827	1.29932387	FLNC	0.792385797	0.810178376	BCL7C	1.367710893	1.498249256	CAPN2	0.811403548	0.806753202	FBXO10	1.910571081	3.723219629								SCYL1	1.768148083	1.404567757	1.754753854	1.850912492	1.783847877	2.012037135
MYOM2	0	0	CGGBP1	1.354929695	1.520446607	FN1	0.513419822	0.181945773	BCL9L	1.407312805	1.484281976	CAPN6	0.42454435	0.440864152	FBXO2	1.245749406	2.112240284								SDHAF1	1.203160649	1.444712173	1.373619396	1.472933721	1.279930229	2.103338725
NAB1	0.696610352	0.779977221	CHAF1B	1.471710943	1.273246921	FOCAD	0.363058911	0.406896919	BCORL1	1.432699948	1.461143074	CAPRIN1	0.729679642	0.803334122	FBXO31	1.694703047	2.43599284								SELENOO	1.539757703	1.258058641	1.492282602	1.387207476	1.333047935	1.63108951
NASP	0.730930643	0.672198874	CHD3	1.37688171	2.220050215	FOLR1	0	0	BCR	1.677663406	1.598378094	CARD6	0	0	FBXO44	1.23106619	2.159135921								SEMA3B	1.498878356	1.727594529	2.457124249	2.161866452	1.675157392	2.228157683
NCKAP1L	0	0	CHERP	1.323913546	1.208121816	FOS	0.539498207	0.529895653	BDNF	1.399995224	1.710369658	CARHSP1	0.640007112	0.585929791	FBXO46	3.868024801	2.642798354								SH2B1	1.291100265	1.292348106	1.444316943	1.431007368	1.276831611	1.627123526
NDST1	0.783058268	0.497667185	CHID1	1.417839951	1.469661438	FOSB	0.553067393	0.553537872	BEND7	1.437656884	1.869601041	CARM1	0.580188821	0.563667178	FBXO6	1.322807463	1.394301611								SHROOM2	2.392674189	1.851009719	2.273780427	1.951345787	1.774366358	1.385418874
NEDD4	0	0.355399061	CHKB	1.222303518	1.310461546	FOXD3	0.763712273	0.694094391	BEX3	1.305492755	1.243749915	CASP10	0	0.020483506	FBXO9	1.40568943	1.529363135								SIRT3	1.391351413	1.420836587	1.423581021	1.432091271	1.219898748	1.741211175
NFRKB	0	0.414340449	CHMP4B	1.502757498	1.21394331	FRK	0.72015941	0.636062195	BIRC2	1.74031057	1.213856089	CASP3	0.61285333	0.634924146	FCRLB	3.094774136	1.244814887								SLC12A8	1.759291671	1.826020796	1.377123443	1.828430129	2.113456193	1.272508242
NHSL1	0	0.369152047	CHP1	1.233765024	1.259915891	FTL	0.80744137	0.782040249	BLCAP	1.369507324	3.757575758	CAV1	0.58652935	0.479461986	FES	7.736935341	4.619399918								SLC15A1	2770.4	2677.9	3875.7	3561.2	305.7	1003.5
NIPA2	0.768873464	0.609971534	CHPF2	1.416581407	1.277244828	FUT8	0	0.387284701	BLVRA	1.776319314	1.272975451	CBFA2T2	0	0	FGF18	1.809187192	2.695049787								SLC22A18	1.441316336	1.246524727	1.993491996	1.629289174	1.296934652	1.338458939
NLRP11	0	0	CHRNB1	1.230340802	1.216165576	FXYD1	0	0	BLVRB	1.585703278	1.230557638	CBR4	0.653482632	0.604642644	FGFR2	1.323622471	1.558784174								SLC22A18AS	1.345772084	1.661795835	1.849447039	1.616137476	1.747647342	2.028246273
NLRP4	0	0	CHRNB4	1.451073749	1.267961706	FYCO1	0	0	BMP1	1.327843165	1.540604907	CBWD1	0.641298848	0.437910814	FHIT	1.553359453	1.56683273								SLC25A4	1.479902151	1.47739131	1.507571639	1.653835907	1.29231964	1.546656617
NOLC1	0.816103413	0.805806723	CHST12	1.548401085	1.407620239	GABARAP	0.726573885	0.665723074	BMP2K	1.541537632	1.583181151	CBWD2	0.389943998	0.51602674	FHL1	1.449678801	1.654878607								SLC27A4	1.312640377	1.384271568	1.730555734	1.466864767	1.454004364	1.745651798
NOMO2	0.787640939	0.809391737	CHST14	1.371619359	1.333216494	GAL3ST1	0.776793987	0.581790515	BMP7	2.140200286	1.854125413	CBWD3	0.62600344	0	FKBP14	1.200001363	1.241239204								SLC29A4	1.354257095	75.7	1.717529215	240.3	1.701168614	240.8
NOMO3	0.807542588	0.611023017	CHST2	1.557025103	1.438542725	GAPDHS	0.392067124	0.540046144	BMP8A	1.881097407	1.54287795	CBWD6	0.341650198	0	FKBP1A	1.376033358	1.287182559								SLC30A4	1.276479686	1.289874364	1.657759549	1.772797724	1.296807247	2.129939279
NPEPL1	0	0	CHTF18	1.321954923	1.403206464	GCDH	0.736474263	0.683980851	BNIP3	1.872618963	1.471622257	CBX1	0.640426104	0.825233221	FLII	1.399368458	1.602901153								SLC38A7	1.244985575	1.654879178	1.566733068	1.718093795	1.320098915	1.581678875
NR2F1	0.79302548	0.59067386	CIAO1	1.430732188	1.269414356	GCNT3	0	0.021452567	BOK	1.252559294	1.436443139	CBX3	0.659609356	0.599725873	FOXO3	1.423603052	1.505347341								SLC46A1	1.448604757	1.660696137	1.532484234	1.616788968	1.317835209	1.601879738
NR2F2	0.609173614	0.46973691	CIB1	1.400688224	1.228756142	GDAP1	0.517834438	0.550985397	BOLA1	1.240730803	1.245692411	CBX4	0.7654502	0.654135357	FRMD8	1.294951982	1.721541874								SLC5A3	1.664983559	1.332302041	1.918984289	1.435983524	1.507524053	1.574406798
NR4A1	0.81307549	0.523871459	CIB2	1.260608076	1.34406419	GDPD3	0.314941649	0.754652781	BOLA3	1.4230774	1.584152198	CBX5	0.59682102	0.56366663	FSBP	3.306101726	1.838754008								SLCO3A1	1.3099022	1.898461594	1.32777142	1.417191192	1.289444936	2.092178116
NRP1	0.66472569	0.79497544	CIC	1.35329506	1.336918998	GEMIN5	0.525072111	0.541274016	BOP1	1.28626175	1.415678953	CBX6	0.828774881	0.714470704	FURIN	1.259704757	1.435804389								SNX4	1.752353044	1.381249834	1.829094715	1.229415839	1.359162742	1.325857063
NT5C2	0	0.565237871	CIZ1	1.30889904	1.233136243	GFI1	0	0	BRD2	1.618459473	1.677917137	CC2D2A	0	0	FUT8	1.633885623	1.42325228								SNX7	1.357747165	1.623759925	1.662597695	1.947087085	1.207768298	2.057323089
OARD1	0.81886563	0.725771037	CKAP4	1.593212161	1.439962206	GINS4	0.789493816	0.732579443	BRD3	1.395845564	1.203230756	CCAR1	0.63695644	0.648389171	FXYD3	1.509032617	2.14912538								SOX8	1.494405191	1.640137177	1.712648209	1.99563234	1.814537405	1.999935294
OPHN1	0.793054416	0.752120533	CLASRP	1.434921784	1.288010794	GLIPR1	0.662702542	0.240155906	BRD4	1.518157662	65.5	CCDC113	0.719435224	0.688824603	GADD45G	1.794929185	3.423984786								SPATA33	1.205090133	1.294524141	1.336566092	1.453693092	1.292506182	1.717279161
OS9	0.794162753	0.788048484	CLIP2	1.408788356	1.273027337	GLRX	0.708208191	0.459417067	BRD7	1.284355344	1.31742061	CCDC14	0.670507132	0.780095339	GAL3ST1	1.978585401	4.122875983								SPNS2	1.734051698	1.979601397	1.508486436	1.67472958	1.222446572	1.880333873
OSBPL1A	0.56335867	0.644280933	CLK3	1.286258232	1.328860553	GLS	0.559966466	0.687226727	BRF1	1.61915938	1.513629603	CCDC167	0.736906417	0.756060445	GALE	1.420354077	1.409336677								SSH3	1.439920348	1.639005606	1.629239681	1.755185856	1.445380159	2.09779856
OSR1	0.537789622	0.487305276	CLMN	1.370314712	1.281689078	GMCL2	0	0	BRF2	1.26067974	1.443541408	CCDC28A	0.636847424	0.584324788	GALNS	1.310279287	1.606052962								SSTR5	1.894034618	2.541945712	2.447120338	2.099323822	1.608772924	2.649260733
OXSR1	0.801844707	0.776508847	CLPP	1.308551045	1.446165079	GOLGB1	0.825835709	0.816362388	BRI3	1.450618258	1.652519601	CCDC51	0.651700803	0.716201113	GALNT11	1.205723399	1.208854989								STAT3	1.49724776	1.336469354	1.240220765	1.381535519	1.432306611	1.696289213
PABPC3	0.593572997	0.721054134	CMAS	1.222693501	1.206789723	GOLPH3L	0.634884327	0.456971606	BRMS1	1.484787574	1.5206263	CCDC82	0.813841555	0.771475448	GALNT5	1.427961676	2.218148792								STEAP3	2.621209936	2.32027123	2.863385735	3.142861406	1.351953138	1.907188435
PADI2	0.745280493	0.643035588	CMIP	1.490778893	1.206624679	GPD1	0.461933758	0.591522881	BRPF3	1.247062699	1.204199836	CCDC85B	0.725068606	0.811318414	GAPDHS	5.496948894	1.984508899								STX1A	1.717664639	1.206165021	2.052701091	1.456341963	1.295474785	1.288414975
PAIP2	0.750852178	0.632756287	CMPK1	1.208066239	1.229611224	GPN1	0.820617165	0.67133915	BST2	2.171521627	2.06688301	CCDC88A	0.610278394	0.823948369	GATA2	1.607452154	2.009544977								STX4	1.379518427	1.74483923	1.999028612	1.752052797	1.375691746	1.925216791
PAQR5	0	0	CMTR1	1.520257945	1.250032681	GPR15	0.524404231	0.325319149	BTBD11	1.283656435	1.294659266	CCDC9	0.675501331	0.658748066	GBF1	1.20635043	1.527041115								SUDS3	1.352817929	1.340905341	1.491818061	1.393955228	1.285824161	1.821434465
PARM1	0.760507235	0.713569979	CNNM3	1.38670291	1.311334003	GPR75-ASB3	0.343238731	0.307511737	BTBD3	1.751518202	1.878217979	CCDC91	0.783343879	0.811133068	GDAP2	1.222759848	1.278285768								SULT1A1	2.443310175	2.607918925	2.463868803	2.11798256	2.146793327	2.194767853
PARVB	0	0.178075747	CNPY4	1.313441409	1.504357816	GPR82	0	0	BTN3A3	2.686396986	4.525472112	CCNA2	0.683824604	0.757583387	GEMIN7	2.261030518	1.814737815								SULT1A2	1.895310902	1.811128029	2.215610849	2.263925898	1.786482933	2.147633549
PC	0	0	CNTNAP1	1.422200711	2.254649768	GPX8	0.697382322	0.526733523	BVES	2.751697182	2.621030346	CCNB1	0.536547954	0.639162862	GFI1	174.7	240.8								SUSD2	1.847998216	2.741483516	1.721199955	2.100686813	1.704806513	1.874587912
PCDH7	0.218701591	0	CNTROB	1.458787043	1.374172379	GREB1	0	0	C11orf45	1.777931476	1.693285433	CCNB1IP1	0.742968628	0.721278923	GLMP	1.445016461	1.282317073								SYNGR3	2.498724598	2.066859166	2.085154324	1.622185556	1.448346229	1.352205149
PCDHGA1	0	0	COA7	1.366036619	1.251257213	GREB1L	0.798801484	0.731922185	C11orf80	1.586759334	1.30597888	CCNB2	0.634415526	0.523051427	GLRX3	1.431070722	1.645791864								TARBP2	1.336399538	1.252009032	1.255305729	1.407112199	1.471485806	1.758859221
PCDHGA5	0	0	COASY	1.622134486	1.32657509	GRHL2	0.464376744	0.376529904	C11orf95	1.542520724	1.442326001	CCNB3	0.498746483	0.482040577	GLT8D1	305.7	8.745098039								TBC1D10A	1.39413356	1.388380565	1.46015919	1.460980657	1.253515876	1.554916112
PCDHGA6	0	0	COG6	1.41150725	1.260278515	GRHL3	0	0.479286694	C12orf75	1.785263906	1.417135662	CCNC	0.738714072	0.69644114	GNAL	1.436010878	4.695695646								TBCB	1.64226318	1.438600328	1.571796782	1.309093587	1.237618173	1.348869382
PCDHGB1	0.69226361	0.701127493	COG7	1.263089717	1.356783017	GSTM1	0	0	C15orf39	1.238349929	1.441439577	CCND1	0.524589093	0.563165602	GNB5	1.374724583	1.323214286								TBXA2R	1.201859572	2.204390329	1.690333949	2.561842138	1.639446426	3.231517364
PCDHGB2	0.50328068	0	COL18A1	1.668638298	2.060501909	GSTM2	0	0	C16orf74	1.680419602	2.414684891	CCNG2	0.80868675	0.70599413	GNPTG	1.981175937	3.545916386								TCEA3	3340.1	30.16994751	3498.4	26.52099738	655.1	2.633858268
PCDHGB6	0	0	COL6A2	1.579674178	1.734495203	GTPBP1	0.765820451	0.813223033	C17orf80	1.393354849	1.236536913	CCNH	0.678445763	0.741723287	GOLGA1	1.404001006	1.750494941								TDRD7	1.304472843	1.350976933	1.753280904	1.698915245	1.373973949	2.019734693
PDLIM1	0.704746541	0.742186607	COLGALT1	1.237339691	1.663610708	GTPBP10	0.714230697	0.64748648	C19orf12	1.494164248	1.58488122	CCNL1	0.619371434	0.473792319	GOLGA3	1.204599852	1.344179084								TESK1	1.317391866	1.342790084	1.749115777	1.544755758	1.267687391	1.676191873
PDLIM3	0.681680547	0.660357231	COMMD8	1.248687784	1.457846952	HACL1	0.790333396	0.74283299	C19orf25	1.53248883	1.588953894	CCNYL1	0.630790317	0.646723647	GOLGA5	1.300221009	1.262366054								TEX261	1.28368947	1.367760701	1.776348446	1.412949926	1.212025525	1.565546191
PDLIM5	0.597225693	0.601270346	COPG1	1.6598003	1.422700721	HARBI1	0.823491215	0.715293537	C19orf33	1.550555277	1.209819301	CCT4	0.732241213	0.709004355	GOLT1A	1.498047266	1.60630376								TFEB	1.410833025	1.466811824	1.853019948	1.571258907	1.391623569	1.747954605
PFDN5	0.746631897	0.709676663	COPG2	1.628387018	1.265707886	HAS3	0.633001524	0.449808821	C1QTNF6	1.669617347	1.557598463	CCT5	0.822272832	0.779119717	GORASP1	1.504966096	2.020695656								TGDS	1.460215408	1.287729308	1.306144894	1.239576687	1.250660129	1.390594104
PGAM4	0.283563019	0.590328959	COPS9	1.265749232	1.335083768	HBP1	0.804539184	0.586511947	C1orf159	1.311056059	1.558274702	CCT6A	0.696602444	0.66666121	GPAA1	1.305830265	1.905113177								THBS1	1.307899195	1.905382048	1.250273395	1.480028247	1.556043633	2.183607109
PHF11	0.585887677	0.73444466	COQ2	1.255496947	1.217800829	HDAC8	0.637357532	0.615458986	C1orf174	1.329433451	1.411073333	CCZ1	0.81083145	0.81442058	GPAT2	1.242514757	1.780095398								TINAGL1	1.518059728	1.237421401	2.00130039	1.592525135	1.505638761	1.405961735
PHGDH	0.795572052	0.386539272	CPNE2	1.20513177	1.619637765	HELLS	0.786472679	0.811731215	C1orf198	1.206946748	1.275389777	CCZ1B	0.826363024	0.716288305	GPATCH11	1.329965774	1.664433905								TJP3	1.940952681	2.064221649	2.517063617	1.587416496	2.22211967	2.339632183
PHLDB2	0.4935164	0	CPNE7	1.348061698	1.259158411	HERPUD1	0.821517915	0.7789257	C1orf21	1.381857597	1.709076906	CD109	0.736740735	0.662502931	GPR108	1.344800469	1.45769308								TM7SF3	1.407847927	1.251868334	1.272163128	1.276386115	1.213085229	1.281657553
PLAT	0.825374562	0.780164245	CPQ	1.593938676	1.603535667	HEXA	0.665843704	0.691410531	C20orf27	1.590769103	1.427951744	CD24	0.292256214	0.578459638	GPR15	6.067031987	5.166914894								TMCO3	1.651291534	1.309516326	1.859482699	1.459598768	1.292759166	1.482846823
PLEKHA6	0	0	CPSF1	1.539759813	1.581090413	HEXB	0.609712445	0.658483051	C2CD2	1.446971252	1.567745022	CD2AP	0.667438889	0.823832007	GPS1	1.418697915	2.446923671								TMED8	1.257134142	1.365289041	1.473463992	1.274230476	1.339012176	1.885339174
PNMA1	0.697110376	0.599069078	CPT1A	1.357703335	1.427805177	HEXIM1	0.767280575	0.71798659	C2CD2L	1.539165199	1.258930153	CD33	0.0447547	0	GPSM1	1.223293033	1.519673829								TMEM115	1.560310429	1.232027912	1.538990863	1.224759889	1.305371423	1.645960249
POMZP3	0.820589769	0.805119725	CPT1B	1.970787904	2.796828247	HEXIM2	0.556703004	0.617366942	C2orf72	1.899318263	2.218954671	CD44	0.775339634	0.779084082	GRB7	1.766278591	1.209944994								TMEM127	1.431772679	1.25337234	1.301330282	1.303039872	1.44048168	1.78655354
PPARG	0.593783629	0.735377863	CPTP	1.508922872	1.355293538	HIP1R	0.706457183	0.661406957	C3orf18	1.244152827	1.293594719	CD46	0.681379828	0.766082344	GRHL3	5.274980931	4.404938272								TMEM151A	1.864906694	1.771600825	2.358076133	1.99654133	1.403970356	2.292622561
PRDM1	0.487311044	0.519433469	CRABP2	1.832958967	1.771431511	HIVEP2	0.661152826	0.656171787	C3orf52	1.255140505	1.508360225	CD81	0.638693202	0.644030795	GRM4	1.210320515	1.738450751								TMEM181	1.511942396	1.452432135	1.68659993	1.791231315	1.476598174	1.464880268
PRDM2	0	0	CRACR2B	1.334785609	2.442197411	HMGB3	0.824872078	0.760955587	C4orf48	1.872084364	1.337534575	CDC25C	0.524260828	0.384047777	GRTP1	1.305107158	1.61002901								TMEM184A	1.259626856	1.318843869	1.479846341	1.769597416	1.354429794	1.619101969
PREPL	0.60021398	0.301396785	CRLF1	1.242052651	1.515062775	HOXC9	0.678590256	0.757772536	C7orf25	1.490134139	1.414201008	CDC42	0.775559017	0.789827907	GSK3A	1.326012709	1.539180648								TMEM199	1.373760047	1.306093817	1.451630258	1.341509207	1.270978155	1.544306427
PRIM2	0.467390671	0.36718259	CRYBG2	1.697501499	1.408936409	HSD17B1	0.358553899	0.429336362	C7orf50	1.35403341	1.685958709	CDC6	0.686734904	0.518700304	GTF2B	1.495288697	1.692661669								TMEM44	1.318445449	1.207071976	1.488042502	1.219709975	1.308733312	1.372573239
PRIMPOL	0.780914819	0.827880687	CSK	1.408671965	1.320731895	HSD3B7	0.478322568	0.520617489	C8orf58	2.061331211	1.979346635	CDC7	0.757376137	0.734531017	GVQW3	1.211211239	1.434268902								TMEM59L	1.615905849	1.884301821	2.018188302	1.364267129	1.947039943	2.715351258
PRPS1	0.745158689	0.807208042	CSNK1G2	1.440262645	1.424031349	HSPA2	0	0	C9orf40	1.324668794	1.389836323	CDCA3	0.4816925	0.719025625	GXYLT2	1.226116303	1.735558127								TOX2	1.565372327	1.69403392	1.500393217	1.799380148	1.524256574	1.693287801
PRPSAP2	0.777169149	0.799636467	CSPG4	1.227472642	1.360568875	HTR7	0.701082016	0.790298653	CA11	1.372977116	1.252887185	CDCA7	0.779624522	0.7521103	HABP4	1.589182438	2.27553328								TPST2	1.505130892	1.30554964	1.92936373	1.598953675	1.33858945	1.444631373
PRR15	0.820155013	0.722373216	CST3	1.441678404	1.484353505	HYPK	0.690768898	0.613777879	CA2	1.631643942	1.963060065	CDH1	0.7864455	0.68471068	HAUS2	1.224427744	1.789356516								TRAK2	1.313890889	1.226872094	1.33601703	1.234679329	1.261552186	1.552183606
PRRT1	0.585375163	0.47384759	CTBP1	1.360236808	1.243883975	ICAM1	0.521356654	0.549743245	CA5B	1.261494733	2.51122058	CDIPT	0.825402351	0.810049691	HCFC2	1.98767001	2.459494788								TRAPPC2L	1.373900081	1.602013634	1.493823529	1.566162845	1.418380338	1.748390913
PRSS23	0	0	CTDSPL	1.922237337	2.103719467	ID2	0.516310874	0.767028743	CAB39	1.268808416	1.539027659	CDK12	0.793472892	0.68664258	HDAC10	1.550917983	2.138770025								TRIM32	1.280881235	1.390951771	1.675368531	1.774804382	1.420530585	1.707483284
PRSS3	0.747530584	0.670821549	CTSD	1.658973195	1.518455255	ID4	0.196370583	0.33601477	CABLES2	1.262453503	1.39115898	CDK13	0.832493893	0.802825489	HEATR5B	1.353821017	1.664433905								TSC2	1.482896193	1.520751124	1.388349609	1.726559111	1.314343125	1.970388786
PSD4	0	0	CTSH	1.78038221	1.566435652	IFI35	0.692567905	0.762994126	CACFD1	1.264688237	1.757713284	CDK19	0.738531993	0.731548743	HEATR6	1.211173607	1.422236604								TSC22D1	1.447286701	2.006476051	1.730766245	2.616141251	1.407188883	1.814699413
PSPC1	0.816430038	0.660842949	CTSZ	1.340485615	1.376365323	IFI6	0.626250204	0.71616863	CACNA1H	1.309606692	1.611178433	CDK2	0.807463334	0.759248843	HECTD3	1.429312625	2.594365754								TSEN54	1.200668667	1.838703054	1.610112437	1.671760005	1.400278229	2.519939038
PTGER4	0.714388187	0.789352838	CTU2	1.400560618	1.473988783	IGFLR1	0	0.358816276	CALB2	1.637547022	1.608928083	CDK2AP1	0.670301218	0.817352012	HEMK1	1.467956594	1.57834209								TSPAN18	1.575429894	1.331956192	3.12662037	2.200484037	1.906547619	1.687796411
PTH2	0	0	CUEDC1	3.019957666	2.300499782	IGSF9B	0.593906019	0.699307898	CALM3	1.524855314	1.484425562	CDK5RAP3	0.710844907	0.745292875	HERC6	1.268370085	1.576261155								TSPAN4	1.689996811	2.043334776	2.544955884	2.222111015	1.504369087	2.030458775
PTP4A1	0.512576663	0.572920962	CUL9	1.229197023	1.490167926	IK	0.797790748	0.764456635	CALU	1.875609946	1.631139572	CDKN1B	0.789701522	0.61039754	HES2	1.336593972	2.570695487								TSR3	1.987242053	2.335556117	1.95693288	2.358238612	2.024009847	3.677073335
PTPRA	0	0	CXCL16	1.46853769	1.311896227	IKZF3	0.542335766	0.250394152	CAMK2D	1.332503575	1.552782641	CDKN2A	0.685254765	0.695090984	HEXA	1.212985219	1.33222797								TTC21A	1.323936581	1.447984642	1.461472907	1.283897164	1.504966096	2.020695656
PTTG1	0.752996799	0.660763348	CXXC1	1.530645871	1.243279249	IKZF4	0.804166667	0.743539262	CAMK4	2.135531047	1.894047238	CDKN2D	0.604036399	0.73838971	HIF1A	1.493236212	4.124537608								TTC9	1.533955189	1.884107756	1.999558819	2.73540047	1.596634418	1.941330682
PUS7	0	0	CYB561D2	1.486165152	1.257451023	IL10RB	0.745480278	0.815764116	CAMSAP1	1.651692252	1.684436887	CDS2	0.760450485	0.701989694	HIKESHI	1.221063733	1.364618165								TTLL3	1.75708942	1.996100421	1.356644594	1.783751752	1.964969924	2.102408564
R3HDM2	0	0.824618736	CYB5R4	1.211996397	1.267335528	ING3	0.790476733	0.809644178	CAMTA1	1.31014892	1.358234921	CDX2	0.594604031	0.741944961	HMGN4	1.712630058	1.471843273								UCKL1	1.334183375	1.715471907	1.413976121	1.535492204	1.290290606	2.060694406
RAB11FIP4	0	0	CYC1	1.3832917	1.308673885	ING4	0.748229891	0.754481171	CANT1	1.509873258	1.226960729	CEBPG	0.8212088	0.63616321	HOXA1	2.223354479	2.502602867								UNC13D	1.276175186	1.394566417	1.546695571	1.730699628	1.679343102	2.26907274
RAPH1	0.789798432	0.7243542	CYFIP2	1.581037584	1.206757131	INO80B	0.606222333	0.674426423	CAP2	1.511829327	1.788016048	CELSR3	0.683657106	0.797845072	HOXB4	1.884715655	2.129625729								URI1	1.773018138	1.428297194	1.613490931	1.689111287	1.366177964	1.670306967
RBM47	0	0	CYHR1	1.371337813	1.39153676	INTS2	0.713759955	0.755808545	CAPN1	1.70932192	1.838335464	CEMIP	0.500524143	0.649277259	HOXB8	2.660104622	2.635965133								VEZF1	1.77783593	1.911624106	1.960876768	2.094272605	1.673579334	1.923866192
RBMS1	0.637989001	0.76721116	CYP1A1	1.36825596	1.966127018	INTU	0.586189268	0.611585526	CAPN15	1.685195142	1.803836102	CENPE	0.596131269	0.535226292	HS6ST2	567.8	602.1								VGF	1.615524214	1.836935397	2.300079505	2.554918912	1.434321961	1.607274494
RC3H1	0	0.824618736	CYP26B1	2.420367279	530.5	IP6K2	0.725838387	0.805285153	CAPN2	1.324655772	1.324009134	CENPF	0.48827151	0.455087635	HSD17B1	1.417982722	1.418410947								WIPI1	1.230241691	1.288705393	1.264451645	1.413120548	1.395200531	1.686244874
RETSAT	0.796028648	0.779897447	CYP27B1	1.484333359	2.215374459	IQCG	0.779279202	0.776826966	CAPN5	1.528504391	1.597024766	CENPK	0.655800386	0.582680156	HSPA8	1.234173563	1.213890383								WNK2	1.273124606	1.650102546	1.819783568	1.966414547	1.252784198	2.590338467
RFLNB	0	0	CYP2R1	1.425388986	1.264862304	ISL2	0.672681878	0.312616124	CAPNS1	1.410766795	1.546717607	CENPL	0.732142182	0.721323179	HSPB8	1.933568307	1.804531989								WNT7B	1.383899204	2.088901449	1.310066313	1.500041866	1.396061008	2.545947417
RGS14	0	0	CYP4F11	1.413649276	1.480492487	IST1	0.824875183	0.635584137	CAPRIN2	1.295749371	1.223105557	CENPM	0.558055287	0.812764799	IFITM3	1.208858864	1.268699357								WWC3	1.548133385	1.315602441	1.788586001	2.096417317	1.207492178	1.543057015
RNF103-CHMP3	0.828964695	0.800747095	CYP4V2	1.273529208	1.307291557	ITGA1	0.807371789	0.661872297	CAPZB	1.385568755	1.692159445	CENPQ	0.47441889	0.418818271	IFT20	1.233859416	1.7170859								YKT6	1.606327426	1.497497345	1.744204194	1.682242277	1.2469192	1.384531237
RNF144B	0.815343173	0.720123519	CYSRT1	1.858683541	2.743149657	ITGB1	0	0.479578393	CARD10	1.728164641	1.460946095	CENPU	0.580322829	0.767679415	IFT43	1.652492718	1.227241435								ZBTB42	1.63109694	1.551817082	1.817739728	1.726575965	1.551687487	2.274249147
RNF19A	0.295957285	0	D2HGDH	1.477500264	1.414532499	ITPRIP	0.80800606	0.606600109	CARD19	1.766885699	1.873468121	CENPV	0.685611099	0.798679309	IGFBP6	1.24548063	1.748170832								ZDHHC1	1.85093641	1.379491782	1.833761099	1.487982986	1.343973543	1.2673924
RNF43	0.391820334	0.333612256	DAD1	1.293467495	1.270055603	KBTBD7	0.785043721	0.797192834	CARMIL1	1.31997955	1.326661372	CENPW	0.493224571	0.375658544	IGHMBP2	1.310578487	1.610749846								ZDHHC8	1.265528823	1.567467498	1.685359192	1.379942367	1.278610541	2.582395121
RPL23A	0.827240041	0.75418287	DBNL	1.332116522	1.446380291	KCNF1	0.471841286	0.80133768	CARS2	1.229382618	1.470318304	CEP250	0.738660758	0.808784141	IKBKE	1.441143946	1.607522272								ZGPAT	1.298803889	1.556987057	1.445016424	1.705426241	1.236358609	1.527867195
RPS6KC1	0.783730325	0.683924935	DBP	1.307063566	1.911763097	KCNMB4	0.786129153	0.792457869	CASKIN1	1.449566951	1.980165687	CEP41	0.578225365	0.631898146	IKZF3	1.806569343	2.30127562								ZNF174	1.298236772	1.242676224	1.321883593	1.337897744	1.328883882	1.418649572
RPSAP58	0	0.551187551	DCTD	1.483532512	1.286395753	KCTD7	0.653666719	0.804165615	CASKIN2	1.35871456	1.387816366	CEP44	0.569531168	0.539057895	IL17RD	1.542777896	2.044462346								ZNF275	1.668221601	1.378739948	1.655404937	1.936224675	1.280973605	1.512110309
RRN3	0.791739135	0.720300788	DCUN1D2	1.682344749	1.325483074	KDM1A	0.772024381	0.800933627	CAST	1.666929881	1.619095249	CEP55	0.520179632	0.60094742	IL18R1	1.402859596	2.313290923								ZNF316	1.491871397	1.322361035	1.709105154	1.25467774	1.292440819	1.80544201
RSF1	0.825347659	0.762842648	DDA1	1.354949694	1.285199185	KIAA0513	0.653699466	0.717022441	CASTOR2	1.887172497	2.502133393	CEP57	0.673741076	0.6619801	IL4R	1.225866967	1.316734857								ZNF445	1.260627462	1.322460138	1.347357179	1.410059259	1.261911523	1.758281103
RTL8C	0.730316294	0.756208961	DDN	1.274613718	1.718917044	KIAA0930	0	0	CAVIN3	1.59574082	2.121029633	CEP68	0.399025752	0.620452986	IL6R	1.504568577	1.441274891								ZNF500	1.641722895	1.458494193	1.560074067	1.295294312	1.293822857	1.333676933
RUNX1	0	0	DDOST	1.325153782	1.277614378	KIAA1143	0.614257531	0.671357402	CBARP	1.510819202	1.779471653	CEP95	0.637485713	0.613855699	ILK	1.307669618	1.466627577								ZNF576	1.569725297	1.382659824	1.343750407	1.201455514	1.517594295	1.459300723
RUSC2	0	0	DDX59	2.063773251	1.861588862	KIF11	0.749703223	0.80334127	CBL	1.457176101	1.371442207	CERS5	0.656848383	0.645080663	INPP4B	15.05718867	10.05788752								ZNF778	1.39516899	1.339186246	1.473583397	1.519954155	1.720170183	2.1507851
RYR1	0.378897239	0.459539525	DEAF1	1.293857787	1.215171486	KIF15	0.612203003	0.672620393	CBX8	1.502427836	1.458323033	CETN3	0.65430812	0.577909135	INPP5E	1.210670195	1.317047981								ZSCAN32	1.29785991	1.233943037	1.343981066	1.338491088	1.321415414	1.423486699
S100A10	0.700259377	0.671608726	DENND1A	1.715815622	1.220945537	KIF20A	0.71132393	0.791192883	CC2D1B	1.344554114	1.451361411	CFAP43	0.780166213	0.81019309	INSIG1	1.215230309	1.59890973
SAMD9	0.807775781	0.719804355	DENND2D	2.480614973	1.542434974	KIF20B	0.647340168	0.784264825	CCDC102A	1.31062909	1.411009634	CFAP73	0.519896267	0.604040053	IPO13	1.266893387	1.556732244
SATB2	0	0	DENND5B	1.550874647	1.658391075	KIF5A	0.706885568	0.525611571	CCDC130	1.425837864	1.418778854	CFL1	0.638984283	0.785780217	IQCK	6.069481561	3.814327485
SCOC	0	0	DFFB	1.502716739	1.660065202	KLF4	0.458302478	0.38952637	CCDC149	1.331365877	1.454289663	CHAC1	0.526858649	0.199358819	IRF2BP1	1.214735252	1.340256218
SEMA3A	0.287487651	0.433879415	DGKD	1.368078359	1.345147962	KLHL15	0	0	CCDC57	1.372894766	1.478338161	CHAC2	0.813942454	0.734795324	IRF9	2.066327209	1.392416651
SENP8	0	0	DHCR7	1.26984988	1.293595713	KLK1	0	0	CCDC59	1.231513682	1.448914971	CHAF1A	0.701013058	0.708301595	IRGQ	1.422955975	1.491354333
SERPINA1	0	0.41512536	DHX33	1.214373917	1.475284425	KRT222	0.798575169	0.611551381	CCDC6	1.317219657	1.34072784	CHAMP1	0.6613911	0.820744756	ISG20	1.897592526	2.150699028
SERPINI1	0.771280953	0.732142233	DHX35	1.242855525	1.388487279	KRT6A	0	0	CCDC71	1.22492086	1.433828365	CHCHD4	0.678854577	0.795221749	ITGA7	1.292064761	1.255611701
SERTAD3	0.3408587	0.49873531	DHX40	1.40938464	1.246291147	KRT80	0.743567168	0.80530655	CCDC9	1.327668657	1.43651334	CHCHD5	0.754097716	0.68795275	ITGB1	2.463776722	1.586517347
SESN3	0.511681525	0.516419727	DIDO1	1.479944944	1.219387587	LAMA3	0.716494525	0.781636257	CCDC91	1.396399974	1.210637371	CHCHD7	0.656398537	0.771607091	ITGB1BP1	1.318141225	1.885404898
SET	0.686587348	0.604597463	DIP2C	1.406265947	1.447575682	LAMC2	0.828502209	0.697117821	CCDC92	2.534437637	1.22683053	CHD2	0.664752177	0.576943347	ITGBL1	38.64683448	80.45533769
SGK1	0.2304038	0	DIS3L	1.22360567	1.348923762	LAP3	0.811388796	0.70192609	CCDC93	1.900822105	1.734600232	CHD6	0.676955097	0.583642886	ITPKC	1.423391545	1.220841975
SGPP2	0.638528749	0.305009257	DIXDC1	1.641548986	2.429662825	LARP7	0.817512892	0.648818075	CCDC96	1.445872703	1.204571036	CHM	0.620329026	0.66440777	JAZF1	2.159148644	9.631380852
SHC1	0.596627169	0.565562319	DLG1	1.331678791	1.326172274	LAT2	0.562298403	0.533081768	CCM2	1.212370917	1.404236262	CHMP1B	0.795250074	0.655346133	JCAD	2.14131561	2.132307066
SHROOM3	0	0	DLG4	6.573222875	2.132137676	LCA5	0.781078611	0.786354499	CCND3	1.564387826	1.651411131	CHMP4A	0.670439903	0.664667765	JOSD2	1.312483039	1.701988121
SKAP2	0.54839813	0.483673766	DLST	1.204137652	1.321088224	LEO1	0.79637549	0.684014182	CCNF	1.438389296	1.357320138	CHN1	0.416412084	0.79404541	JPT1	1.623557923	1.650692071
SLC12A6	0.461104513	0.583095186	DMPK	1.587335876	1.800278963	LFNG	0	0	CCNG1	1.248900548	1.481093776	CHTF8	0.678751533	0.802509303	KAT6A	1.252039469	1.64311783
SLC20A2	0.121337931	0.099243039	DNAAF2	1.251768103	1.278942205	LGALS7	0	0	CCNI	1.217169696	1.473500291	CHTOP	0.565163867	0.474914991	KBTBD11	1.272755757	1.720903724
SLC25A44	0.763973566	0.808116917	DNAJB2	1.365146425	1.411926712	LGALS7B	0	0	CCNJL	1.372026934	1.433760602	CILP2	0.484773873	0.716569917	KBTBD8	1.351613874	2.032890744
SLC2A11	0.788204733	0.767704413	DNAJC12	1.656549125	1.326101085	LGALS8	0	0.638523392	CCNO	1.408290291	1.333976238	CIRBP	0.739197089	0.725704792	KCNH2	1.630049175	2.093086732
SLC2A12	0.607628467	0.636878695	DNAJC4	1.223899053	1.425393891	LIAS	0.822330136	0.812151005	CCPG1	1.211935828	1.214490558	CISD2	0.677693104	0.775208955	KIAA0930	3.094774136	722.5
SLC8A2	0	0	DNER	1.328203413	1.839148352	LIN37	0.829938628	0.738887927	CCSAP	1.71000233	1.473806019	CITED4	0.788448262	0.615168271	KIF1C	1.445740719	2.024063947
SMAD7	0.270893492	0.437453616	DNMT3A	1.224257529	1.64126766	LMBRD1	0.683016363	0.57641366	CD151	1.909526475	1.951848952	CKAP2	0.549645714	0.62228667	KIF21A	1.20689133	1.484628267
SMIM14	0	0.691297209	DOCK7	1.267263539	1.37337225	LMTK3	0	0	CD276	1.341862935	1.749182193	CKB	0.633420981	0.746924165	KIF21B	1.754317847	1.998032066
SMTN	0.809021816	0.75141731	DPF2	1.298438059	1.260234768	LNPEP	0	0	CD44	1.367370373	1.300922049	CKLF	0.756832147	0.61498429	KIF9	1.293046856	1.606322945
SNTB1	0.600912969	0.648318993	DPH7	1.472118559	1.4021185	LNX1	0.389423997	0.336125503	CD47	1.573387687	1.807458344	CKLF-CMTM1	0.756832147	0.61498429	KIFAP3	1.541263136	1.36711902
SPAG1	0.697506602	0.711703762	DPP4	1.322747919	1.80779742	LPAR5	0	0	CD59	3.202312139	4.185002737	CKS1B	0.717355779	0.534321285	KIFC2	1.324236442	2.122477208
SPATA13	0.314459295	0.828740157	DPY19L1	1.310111557	1.370211217	LPCAT3	0.757702033	0.817750458	CD63	1.589085095	1.660053678	CLHC1	0.733237618	0.759310224	KLC4	1.303150268	1.340341561
SPIB	0.564743208	0.581389997	DPYSL3	1.245817234	1.218076277	LRRC20	0.614828392	0.746379906	CD83	1.26230648	1.23238103	CLK1	0.778621138	0.727592389	KLHDC4	1.273291761	1.213966392
SPIN2A	0.59528467	0.366920842	DPYSL5	1.310838044	1.6141356	LRRC6	0.827434693	0.722669207	CD99L2	1.524779682	1.714793513	CLNS1A	0.813672731	0.82604308	KLHL17	1.255754015	1.496879412
SPOCD1	0.716199454	0.770183064	DRAXIN	1.36116868	1.4602572	LRRC8D	0.710417621	0.833160472	CDA	1.321683006	1.235093837	CLOCK	0.733267082	0.746407138	KLHL18	1.288597823	1.586531366
SPTSSB	0.759037642	0.768381517	DSN1	1.34239454	1.329847011	LSM8	0.743141503	0.796516053	CDC42	1.256598139	1.408772492	CLUAP1	0.670122876	0.671635888	KLHL35	1.255453731	1.310420708
SRGAP2	0.656758105	0.715700009	DTD1	1.473674854	1.202660493	LTA4H	0.642201927	0.629758693	CDC42BPB	1.413582027	1.247965477	CMC1	0.787260433	0.755741155	KLHL36	1.299163026	2.50305224
SRGAP2B	0.753446984	0.643979058	DTX3L	1.230573239	1.204556975	LYNX1	0	0	CDC42BPG	1.593393831	1.287451772	CNBP	0.757978929	0.761597806	KLK10	2.140183072	1.822820037
SRGAP2C	0.669452064	0.703873231	DTX4	1.5210775	1.738537021	LYPD1	0	0	CDC42EP1	1.477501402	1.505194509	CNIH4	0.800034131	0.548266684	KLK5	1.347665089	2.64165844
SRMS	0.361811971	0.636434527	DUS1L	1.537677408	1.41259616	LYRM4	0.373899288	0.467556968	CDC42EP2	1.582529073	1.548056838	CNNM4	0.727354038	0.792809244	KLK6	1.619846507	2.153654836
SRRM5	0	0.824618736	DUSP22	1.493762496	1.553648044	LYSMD4	0.789289413	0.773093279	CDCA4	1.315065499	1.501083693	CNOT10	0.583686619	0.692197949	KLK7	2.672932591	2.450248139
STAC3	0.2304038	0.831238779	DUT	1.256678429	1.260095352	LZTS1	0	0	CDCP1	1.473466058	1.359735352	CNOT2	0.790695532	0.482788762	KLK8	1.275391727	1.324891426
STAT4	0.825795752	0.714706121	DVL1	1.28190018	1.297779461	MACC1	0.433929812	0.483013815	CDK10	1.379086641	1.527235901	CNTNAP3	0.614805001	0.504002511	KMT2B	1.418715939	1.92382939
STK17B	0.815882637	0.792188444	DYRK2	1.515776811	1.515935196	MAGEA2	0.658810291	0.650661915	CDK18	1.59400971	1.488846209	COA4	0.70600418	0.832443469	KRT10	3.868024801	3.287469287
STK24	0	0.191742655	E2F4	1.332237683	1.569215775	MAGEA2B	0.516822757	0.580722998	CDK2AP2	1.249656884	1.351700858	COG4	0.797249812	0.799510632	KRT15	1.557596291	4.624965706
STOX2	0	0	EBF2	1.231631056	1.215638369	MAGI1	0.812209524	0.619405958	CDK5R1	1.360522928	1.611005675	COIL	0.723121406	0.6314331	KRT7	1.650167384	1.818625037
SULT1C2	0.5696088	0.535999843	ECHDC2	1.249221666	1.228131053	MAP1B	0.727618771	0.482845717	CDK6	1.874055911	1.298006409	COL12A1	0.598202057	0.553106312	KSR1	1.394712274	2.175608335
SUV39H1	0.407459868	0.713702715	ECHDC3	1.463137553	1.447958247	MAP4	0	0.682046834	CDK9	1.639725733	1.587379708	COL4A5	0.578745432	0.762193769	LACTB	1.608860086	2.035385658
SYCE2	0.727693876	0.811066374	EEF1B2	1.402835208	1.380342467	MAP7	0	0.717840376	CDKN1C	1.341216171	1.829803356	COMMD10	0.51020779	0.522059739	LAMB2	1.285198191	1.480585375
SYS1	0.53260646	0.175195143	EFCAB14	1.283231123	1.391331022	MAPRE3	0	0.359396433	CDKN2AIPNL	1.306985324	1.314443032	COMMD4	0.649229762	0.645119728	LAMB3	1.624659029	1.268246445
SYT15	0	0	EFHD2	1.319577704	1.349541542	MARCKS	0.818021785	0.659577606	CDON	1.799864475	1.51701644	COPS7A	0.556171632	0.618517904	LAMC1	1.432480264	1.354966107
SYTL3	0.601774151	0.451816925	EFL1	1.420352101	1.208284946	MARCKSL1	0.634825146	0.801110049	CDR2L	1.310303393	1.516809438	COPS7B	0.825535979	0.815521893	LATS2	1.473496109	1.460848998
TACSTD2	0.132890157	0.130795516	EFNA3	1.334151544	1.39192734	MAST4	0	0.101658347	CDT1	1.53278676	1.414685371	COPZ1	0.422066835	0.398221355	LDLRAP1	1.245887839	1.713806123
TFR2	0	0	EFR3A	1.406771468	1.296402139	MAT2B	0.656407924	0.557311568	CDV3	1.249057539	1.246869496	COQ3	0.625881392	0.628620772	LETM2	174.7	160.5
TIAM1	0.265164645	0.068054012	EHBP1L1	1.226031001	1.272442749	MAX	0.753873313	0.758355604	CEBPA	1.435047643	1.644193302	COQ7	0.679251804	0.570384122	LGALS9	393.1	321.1
TIMP3	0.489809785	0.629690965	EHF	4.835037795	555.7	MDH1	0.778299006	0.715058166	CELSR1	1.678348706	1.733262942	COQ8A	0.749150022	0.770920651	LGALSL	1.41063731	1.963406286
TLL2	0.431391756	0.699954225	EIF2AK4	1.237698597	1.236677527	MDN1	0.711019103	0.744719391	CELSR2	1.373300137	1.997506478	COX15	0.679223773	0.646196625	LGR4	1.269711436	2.139998615
TLN2	0.684261276	0.672308566	EIF4ENIF1	1.247429399	1.236531327	MED17	0.801096131	0.800803203	CELSR3	1.729135658	1.915835484	COX16	0.758755718	0.691143753	LHFPL2	1.247345385	1.529067336
TLR6	0.622168823	0.543963282	EIF4G3	1.329480711	1.230945016	MED20	0.823525895	0.818530192	CEMIP	1.358911084	1.447444889	COX17	0.638194432	0.655670565	LIF	11.22787522	8.864202518
TLX3	0.821239598	0.819078706	ELFN2	1.648312815	1.35839467	MEF2B	0	0.820187793	CEP104	1.610045151	1.617561927	COX18	0.804519204	0.828065726	LIMS2	1.441272119	6.55234657
TMBIM1	0.683409673	0.547834559	ELMO2	1.24851632	2.534578856	MEF2C	0.732851925	0.600437715	CEP131	1.279933167	1.358313348	COX20	0.652245217	0.596212944	LINS1	1.268768684	1.898759999
TMEM126A	0.803824462	0.810222563	ELMO3	1.301317908	1.521728456	METTL16	0.620181541	0.701531241	CEP170	1.561807666	1.552619154	COX5B	0.659626866	0.767667945	LMCD1	1.945554686	2.200330015
TMEM200A	0.490800217	0.641623305	ELOF1	77.6	75.7	METTL18	0.74661041	0.69682033	CEP170B	1.56537188	1.616382292	COX6B2	0.379397712	0.613855276	LMF2	1.202500618	1.76964928
TMEM40	0.51990246	0.795598533	EMC3	1.456602374	1.74554218	MFGE8	0.666401488	0.651343085	CEP19	1.373222203	1.479990569	COX7B	0.664675409	0.577329228	LMTK2	1.44921134	1.678616903
TMEM92	0	0	EML5	1.312491958	1.335763603	MFSD4A	0	0	CEP57L1	1.430416364	1.498300261	COX7C	0.672964549	0.514753925	LPIN1	873.5	1043.6
TNFSF9	0.670738526	0.659743029	EMSY	1.301609281	1.236439454	MIA2	0	0	CEP85	1.200503031	1.207479594	CPOX	0.621983478	0.549587857	LRCH3	1.540857572	1.589295054
TPD52	0	0	ENDOV	1.401127173	1.283598676	MIPOL1	0.784385864	0.759335375	CERCAM	1.34194585	1.554654174	CPSF6	0.79433262	0.761088756	LRP11	1.206774819	1.513978597
TRIM22	0	0	ENHO	1.473969311	1.291145322	MITF	0.682976555	0.501777846	CERK	1.538271991	1.836637263	CPT2	0.688474401	0.788218615	LRRC3	1.681084451	2.18807826
TRIM36	0	0	ENKD1	1.751049082	1.76625786	MKRN3	0.687838725	0.634745677	CERS2	1.214809415	1.41340952	CRAMP1	0.615472243	0.638766214	LRRC47	1.235704425	1.30438184
TRIM39-RPP21	0.460204535	0.416633943	ENO4	1.258211827	1.254094582	MKX	0.101923458	0.09394048	CERS4	1.330238994	1.492228597	CRBN	0.79221777	0.625881284	LRRC57	1.224427744	1.796462004
TRPM6	0.754180645	0.406633607	ENOX1	1.515149215	1.302543818	MMACHC	0.727075151	0.676903841	CERS6	1.360044817	1.462271252	CREB1	0.773048903	0.604628351	LRRFIP2	131	3.497821351
TTC39A	0	0	ENTPD2	1.317315987	1.394144967	MMEL1	0	0	CFAP206	1.34634346	1.437669349	CREB3L4	0.730157068	0.727469303	LRSAM1	1.233089757	1.54026307
TUBB2B	0.235196123	0.705273534	EPB41L1	2.285838339	4.198901099	MOB3B	0.358844697	0.506667559	CFAP46	1.538822111	1.369766078	CREM	0.75448594	0.683351994	LSG1	1.233374632	1.722941564
TUBGCP5	0.716982067	0.770892271	EPB41L4A	1.727529014	1.595663899	MORF4L2	0.766755	0.746851573	CFAP69	1.283474319	1.283369199	CRIP1	0.351905529	0.641210208	LSM14B	1.265818056	1.686941275
TUFT1	0.711974278	0.679557009	EPB41L4B	1.311293938	1.247783829	MOSPD1	0.704807416	0.621101844	CGGBP1	1.243813351	1.328374085	CRLS1	0.741163636	0.82222536	LTBR	1.584197728	1.816208259
TXNRD1	0.701482596	0.474984332	EPC2	1.284924976	1.31610071	MPP7	0	0.331813576	CGNL1	1.475026407	1.367844806	CROCC	0	0	LYPD3	1.2324975	1.682853728
UACA	0.759418919	0.659719141	EPHX2	1.234305403	1.29649626	MRAS	0.688485236	0.730490602	CHADL	3.644818423	1.505843572	CS	0.82638159	0.821031234	MACC1	1.43747726	1.3832349
UBAP2	0.749023594	0.649061103	EPN1	1.931769723	1.886034256	MRPL22	0.485836248	0.432039444	CHAF1B	1.367452619	1.621742747	CSDE1	0.707482645	0.673994712	MAEA	2.718541574	1.318779343
UBE2L3	0	0	EPN3	1.557131876	2.211210591	MRPL35	0.815004596	0.606177499	CHCHD3	1.243141025	1.540418328	CSNK2A1	0.688322698	0.678525005	MAML2	2.022089947	4.362183841
USP6	0	0.738669591	EPPK1	1.537564155	1.781364538	MRPL43	0.796404956	0.784482086	CHD1	1.265158519	1.259625082	CSRP1	0	0	MAMLD1	1.232953009	2.164300382
USP6NL	0	0	EPS8L2	1.225743681	1.32469	MRPL45	0.723611446	0.827578362	CHD4	1.325172915	1.592823099	CSRP2	0.641516743	0.797819328	MAN1C1	1.237664061	2.211978016
UTP14C	0	0.711267606	ERAP1	1.38835644	1.401352282	MRPL46	0.733967061	0.785628669	CHD9	1.217927613	1.231466856	CSTA	0.306588984	0.143970308	MAN2B2	1.20178501	1.78224916
UTRN	0	0	ERCC6	1.484897459	1.239271697	MRPS11	0.725857356	0.779457007	CHDH	1.526202975	2.219523811	CSTF3	0.718919625	0.66249723	MAP1LC3B2	2.235586075	1.974531895
VASH2	0.634573358	0.577982693	ERGIC1	1.377055962	1.32290956	MRPS18A	0.736563437	0.776636286	CHID1	1.58687512	1.677540652	CTBS	0.797771766	0.685264906	MAP3K12	1.433393611	3.451689672
VCAN	0.54315574	0.522941939	ERICH1	1.339250549	1.249507243	MRPS22	0.779531459	0.78010025	CHKB	1.231165456	1.29359454	CTDSPL2	0.829518319	0.755276446	MAP4	1.547387068	1.322810061
VCPIP1	0.790017033	0.531072832	ESPN	1.385116578	1.403003657	MRPS31	0.809095941	0.6569049	CHML	1.214348981	65.5	CTH	0.709813058	0.733329946	MAP4K3	1.247593328	1.728910908
WASHC1	0.500073039	0.555601375	ETAA1	1.533159695	1.222498284	MSANTD3-TMEFF1	0	0.536445536	CHMP4B	1.369110773	1.73033903	CTNND1	0.676007153	0.432264469	MAPK8IP1	1.36869694	1.324138415
WLS	0.750303317	0.806144041	ETHE1	1.487666719	1.28970924	MSX2	0.628477846	0.748391391	CHMP6	1.277247403	1.450310597	CTR9	0.652106407	0.68779753	MAPK8IP2	1.568315988	2.901944269
WNT16	0.399562517	0.225452873	ETS2	1.404541395	1.462904691	MT1A	0.485678313	0	CHPF	1.281526369	1.475102354	CTXN1	0.643293811	0.798318696	MAPKAPK3	1.287215464	2.027480496
YWHAZ	0.768538122	0.801267481	EXD3	1.696541815	1.281089873	MTF2	0.699928888	0.665076557	CHPF2	1.781330744	1.263487156	CUTA	0.698114341	0.784420042	MAPRE2	6.483966746	1846.4
ZBTB38	0	0	EXOC3	1.41509192	1.360109622	MTMR14	0.808287828	0.638992908	CHPT1	1.389948662	1.738882736	CUTC	0.652068329	0.651858148	MB21D2	1.578513676	1.394528917
ZBTB6	0.77273312	0.772372389	EXT2	1.280313587	1.379103924	MTO1	0.825514728	0.765355924	CHRAC1	1.217127833	1.466642762	CWC22	0.816942811	0.539137868	MCOLN3	1.26025179	1.771352585
ZEB1	0.813309826	0.828938888	EZH1	1.354126484	1.254599927	MUC16	0	0	CHRD	1.359787611	1.954383961	CWF19L1	0.650310013	0.648083885	MCRS1	1.810605406	5.574926901
ZHX2	0.763792346	0.647515695	F10	1.842046142	1.71864868	MXI1	0.832752504	0.499673274	CHRNA7	1.410948228	1.448300438	CWF19L2	0.574400775	0.679364037	MDK	1.274844565	1.679899558
ZNF134	0.45327366	0.50175181	FAM114A1	1.95426988	1.498036632	MYL6	0.650174134	0.796256814	CHRNB4	1.752070624	1.522957524	CXorf56	0.762314491	0.675354181	MED27	1.236233605	1.584360542
ZNF136	0.752560503	0.682699286	FAM117B	1.22063456	1.272897176	MYOM3	0.229055258	0.536445536	CHST12	1.583011466	1.243419177	CYB5B	0.474880798	0.420847363	MED28	1.387375879	1.294410243
ZNF148	0	0	FAM160B1	1.51335502	1.574905408	N4BP1	0.754216904	0.782142208	CHST15	1.413395423	1.738970713	CYBRD1	0.581537551	0.785025285	MED9	1.660730232	1.406082077
ZNF177	0	0	FAM168B	1.308620684	1.23277212	NAA60	0.703516438	0.638028924	CHSY3	1.367653396	1.513265153	CYP4F11	0.790854292	0.59675813	MEST	131	3.497821351
ZNF222	0.60526953	0.526198734	FAM189B	1.268030028	1.250815414	NARS2	0.804666505	0.693677526	CHTF18	1.383335706	1.723784576	CYSRT1	0.27861839	0.582942257	METTL26	1.754846953	2.588394438
ZNF234	0.655323999	0.521565894	FAM193B	1.314172448	1.332961062	NASP	0.493135594	0.610469364	CIAO1	1.319708942	1.313121926	CYTH2	0.696076385	0.736524241	MFAP3	1.465949299	1.816802604
ZNF266	0.71382244	0.681761094	FAM20C	1.340711159	1.295469575	NCAM1	0.282405024	0.431938036	CIAPIN1	1.328357312	1.256099752	CYTH4	0.389888644	0.229564452	MFSD9	1.615409817	1.824535653
ZNF350	0.436759939	0.260893903	FAM210B	1.215553719	1.926572516	NCOA7	0.603424386	0.388891084	CIB2	1.381530445	1.406668693	DAGLB	0.82132703	0.577618645	MGAT1	1.210577025	1.51117635
ZNF41	0	0	FAM214A	2.281030445	2.359752747	NDUFA2	0.802502937	0.769132254	CIPC	1.655624514	1.361139842	DARS2	0.729185683	0.726085523	MGAT4B	1.462214882	1.820902557
ZNF426	0.233112231	0.292456667	FAM217B	1.384985735	1.752818734	NECTIN3	0.677391591	0.735427887	CISD3	1.307918267	1.510800226	DAZAP2	0.730133149	0.54848027	MGAT5	1.298547192	1.332055616
ZNF480	0.73615481	0.725621146	FAM222B	1.26585093	1.380772537	NECTIN4	0	0	CIZ1	1.222862782	1.254271894	DBF4	0.721655017	0.826207981	MGLL	2.085697647	2.916525694
ZNF490	0.807967627	0.805787173	FAM89A	1.440556541	1.512118464	NEDD4	0	0	CKAP4	1.482255574	1.472258864	DBF4B	0.570611537	0.505666598	MIA2	3.780292943	160.5
ZNF493	0.435264062	0.284745532	FBLIM1	5.198187995	5.223703926	NEIL1	0.826946483	0.700540709	CKLF	1.338064212	1.297112869	DCAF1	0.731569561	0.773822858	MICALCL	2.875128574	2.243657733
ZNF525	0.740922677	0.506594146	FBXL16	1.279420561	1.48122517	NFIA	0.724389947	0.756211132	CKLF-CMTM1	1.338064212	1.297112869	DCAF12	0.655590698	0.682417014	MICALL2	1.642639655	1.93955377
ZNF550	0	0	FBXL18	1.456767744	1.484583575	NFRKB	0	0	CLASRP	1.413896514	1.451816692	DCAF15	0.641357054	0.81610357	MID1	4.255093003	1.938954765
ZNF566	0.794934455	0.575526046	FBXO2	1.779079538	2.101439036	NHSL1	0	0	CLBA1	1.633941675	1.51651135	DCAF6	0.665380682	0.771752958	MID2	1.795517836	1.547185973
ZNF567	0	0	FBXO27	1.351862878	1.236843335	NIF3L1	0.763796675	0.597239034	CLCF1	1.681255995	1.74887352	DCAKD	0.63667774	0.57929242	MIEF2	1.271978511	1.216447658
ZNF573	0.75595449	0.640971751	FBXO31	1.290752725	1.221580456	NLK	0.709245742	0.503126028	CLCN2	1.288883662	1.988059594	DCBLD2	0.552336488	0.43767846	MIGA1	1.401538438	1.447512377
ZNF585A	0.667127378	0.630070036	FBXO44	1.746755336	2.112585177	NOMO1	0.665134518	0.680042127	CLCN6	1.459799147	1.251155923	DCP2	0.674454687	0.747684094	MINK1	1.515720215	1.487202304
ZNF585B	0.714476364	0.809956464	FBXO6	1.258508588	1.250804541	NOS3	0	0	CLCN7	1.32280689	1.257539064	DCPS	0.771796055	0.821584087	MLYCD	1.340282177	1.778007297
ZNF595	0.114610644	0.359466977	FBXO7	1.36789913	1.28157495	NR2F1	0.584759774	0.580063206	CLDN23	1.447145388	1.639344903	DCUN1D5	0.770031439	0.777863353	MMRN2	3.026652452	6.903357903
ZNF600	0.637806287	0.722879654	FBXO9	1.381917647	1.38631857	NR2F2	0.763705455	0.553517007	CLIC3	1.390530721	2.377686796	DDB2	0.617363655	0.690595061	MOB2	349.4	642.2
ZNF675	0.770389826	0.797472681	FCHSD2	1.471503011	1.517222146	NR4A1	0.663266211	0.54060786	CLINT1	1.500367085	1.31861146	DDIT3	0.651523828	0.458399097	MOCS1	1.243019634	1.915025129
ZNF69	0	0	FES	1.375553587	3.322646938	NR4A3	0.643251267	0.524478328	CLIP1	1.259308404	1.216979698	DDX11	0.662288065	0.55139827	MPG	1.267602006	1.636373721
ZNF701	0.49230073	0.491104036	FGF18	1.489942208	1.954935989	NRP1	0.363700631	0.564521081	CLIP2	2.136133897	1.487469735	DDX17	0.653283591	0.595517305	MREG	1.20861581	1.659896808
ZNF772	0.659870014	0.555257052	FGFBP1	1.387167034	1.931080573	NSUN6	0.693344671	0.631711706	CLMN	1.230055537	1.606963016	DDX19B	0.626205047	0.413962401	MRI1	1.29370948	1.804687313
ZNF773	0	0.481873374	FGFR2	1.50473457	1.243656318	NT5C2	0	0.308643429	CLN6	1.269810263	1.759242973	DDX27	0.702959569	0.820803817	MROH1	1.34793454	1.731388445
ZNF804A	0.521094378	0.652820778	FHL1	2.217665953	1.481264315	NTN4	0.639878951	0.802496077	CLTA	1.274938709	1.357774305	DDX39A	0.637171283	0.578940129	MROH6	1.318967208	1.554870625
ZNF813	0.760449427	0.704159305	FHOD3	1.390604365	1.868090248	NUDT21	0.801854505	0.72006386	CLTCL1	1.373914024	1.264952563	DDX3X	0.72285008	0.664534015	MRPL14	2.81822474	3.306425041
ZNF814	0	0.552818829	FIS1	1.220610678	1.287332808	NUDT5	0.817865386	0.76700255	CMTM7	1.425608039	1.791552973	DDX47	0.709243531	0.643431519	MRPL2	1.348887387	1.429691074
ZNF83	0.580650912	0.471307993	FJX1	1.220707955	1.256505047	NUF2	0.787239231	0.744887492	CMTM8	1.368969189	1.46645768	DDX5	0.574789351	0.458209664	MRPL21	1.303345333	1.609111937
ZNF845	0.814616046	0.645868476	FKBP5	1.418007718	1.227275156	NUP133	0.781293436	0.745339018	CMTR1	1.471262648	1.365202102	DDX6	0.736988856	0.617446131	MRPL36	1.213161475	1.484639822
ZNF850	0.639770917	0.729534614	FLT3LG	1.23076317	1.264255572	NUP35	0.806505128	0.772090093	CNBP	1.271199049	1.307219988	DEDD2	0.709207283	0.728262638	MRPL47	1.341096126	1.220432252
ZNF91	0.513805219	0.380877999	FLYWCH2	1.314901211	1.40591433	NXF1	0.726824079	0.687964078	CNEP1R1	1.491039797	1.431664336	DEK	0.714213946	0.739147675	MRPL55	1.255439409	1.493928962
ZP3	0.581454786	0.571069142	FN3K	1.763622807	2.107343785	OARD1	0.696808676	0.602272869	CNNM3	1.271546182	1.26939943	DENND6A	0.817529691	0.799966552	MRPS6	1.507524053	1.574406798
ZRANB1	0	0.792968137	FNBP1L	1.38349643	1.280372936	OASL	0.648510951	0.571468813	CNOT11	1.493735763	1.297320385	DENND6B	0.685276678	0.718639764	MSANTD2	1.204684077	1.255568081
ZUP1	0.574556333	0.668606862	FOXD2	1.327394633	1.279984994	OGT	0.822930793	0.682054841	CNPY4	1.547409529	1.287577545	DEPDC1B	0.606289204	0.815536441	MTCH2	1.210454597	1.660537895
			FOXO3	1.569557273	1.332990252	OLFM2	0.535663816	0.644232437	CNTNAP1	1.575097924	1.613919304	DEPDC5	0.68465296	0.690663749	MTHFR	1.307288385	2.56212766
			FRMD8	1.213957153	1.487170323	OPHN1	0.791771545	0.614171008	CNTRL	1.285069314	1.223650214	DEPTOR	0.780132033	0.658242191	MTRNR2L1	3.422568837	2.517468897
			FSBP	1.744761377	1.24983967	ORC2	0.708908268	0.768057404	CNTROB	1.613283942	1.352659128	DERL2	0.707438253	0.679451211	MTRNR2L2	4.104534738	2.439317155
			FSTL3	1.451448931	2.206224407	OS9	0.742034205	0.624217652	COA7	1.418167469	1.471157939	DET1	0.767479297	0.640656811	MTRNR2L6	3.876234259	2.127368065
			FXN	1.236056727	1.476625661	OSBPL9	0.708271178	0.691519476	COL18A1	1.68131473	2.746372068	DFFA	0.643762535	0.726218408	MTRNR2L8	3.473032243	1.421306392
			FXYD3	2.09615272	1.755638271	OSR1	0.530226007	0.504376705	COL6A1	1.659680802	2.027371055	DGCR8	0.67394209	0.786502228	MVP	2.337616102	2.572092924
			FZD3	1.410793957	1.413586198	OVOL1	0.511539151	0.53191343	COL6A2	1.992582983	2.180741132	DGUOK	0.677643225	0.803601559	MXRA7	1.499213047	1.705359808
			FZD5	1.235905436	1.233522509	PAIP2	0.627106182	0.582001177	COL9A3	1.755622352	2.159382486	DHODH	0.735058208	0.796750175	MYADM	1.321660089	1.218746363
			G6PD	1.217523623	1.300201617	PAIP2B	0.746990243	0.51961006	COLGALT1	1.338364069	1.916441114	DHPS	0.71253372	0.725791453	MYL9	1.726760137	2.043153597
			GAA	1.400314493	1.341028498	PALM3	0	0	COMMD8	1.31157673	1.276008295	DHRS4	0.566876959	0.678731528	MYLK	1.373701683	1.939206012
			GABRD	1.217937901	1.4147645	PAPOLG	0.816124227	0.659394331	COMTD1	1.288531545	1.854429256	DHTKD1	0.672010694	0.686616304	MYO1C	1.886776967	1.914849354
			GAL	1.259420348	1.438926516	PARM1	0.437164689	0.467714276	COPG1	1.567378932	1.369044131	DHX15	0.812401786	0.740757194	MYO5B	1.366916794	2.418343113
			GALNS	1.389828801	1.516228358	PARS2	0.727070379	0.773497628	COPG2	1.608101878	1.410075052	DHX36	0.682608574	0.703689015	MYORG	1.229299535	1.901742411
			GALNT1	1.305930972	1.656653484	PBX1	0.738250346	0.617122857	COPRS	1.318040353	1.483984652	DHX8	0.7086925	0.676970291	MYRF	1.257271108	1.602423942
			GALNT4	1.276960381	1.244281999	PBXIP1	0.777076987	0.678102621	COPS9	1.292850219	1.203260744	DIAPH3	0.793616095	0.741258242	MYZAP	1.305587597	2.081153561
			GAMT	1.408973986	1.573399765	PCDH7	0	0	COQ2	1.306564815	1.425729104	DIS3	0.662439824	0.603088294	NAA10	1.314338679	1.398221789
			GAN	1.387066915	1.335634255	PCDHGA1	0	0	COQ9	1.350961826	1.259633018	DKC1	0.63986085	0.615125799	NACC2	1.211236082	1.873573037
			GAREM1	1.248278928	1.251466893	PCDHGA10	0.736439495	0.66405509	CORO1C	102.8	1.430794431	DKK1	0.597414195	0.499135468	NAPA	1.322745511	1.215233796
			GAS6	1.227771838	1.744531987	PCDHGA2	0	0	CORO2A	1.597869507	218.4	DLG3	0	0	NATD1	1.51000633	1.874871443
			GATA2	1.315242454	1.464909144	PCDHGA5	0	0.358816276	CPEB2	1.679620797	1.658305828	DLG4	0.816942811	0.47632863	NBAS	1.200730221	1.832338937
			GATD1	1.437996302	1.328104039	PCDHGA7	0	0	CPNE2	1.443537691	1.910291429	DLGAP5	0.6407347	0.544117157	NBDY	1.224862917	1.369584291
			GCC1	1.577773863	1.616353791	PCDHGA8	0	0.258484609	CPNE3	1.242398455	1.256517893	DLL4	0.536367411	0.743712435	NBL1	1.767436325	3.530181891
			GDPD3	1.337440214	1.979687581	PCDHGB1	0	0.416825672	CPNE7	1.47172624	1.655217668	DMAP1	0.76062514	0.700684752	NCOA1	1.339334677	1.812095787
			GDPD5	1.301516281	1.270603532	PCDHGB2	0	0.442502533	CPPED1	1.228994544	1.248873044	DMKN	0.797006639	0.659338972	NDUFA8	1.333114784	1.389228337
			GDPGP1	1.394369813	1.275852118	PCDHGB6	0	0.307511737	CPSF1	1.57082426	1.758392316	DMTF1	0.802941772	0.723348737	NDUFAF3	1.205650241	1.435878184
			GET4	1.398701786	1.285704222	PCDHGB7	0	0	CPTP	1.683641886	1.44760298	DMXL1	0.783912442	0.750154555	NDUFB5	1.340103517	1.220432252
			GFPT1	1.499517149	1.479472525	PCF11	0.819620891	0.822101864	CRABP2	1.535395424	1.668547225	DNAAF3	0.69494361	0.749728146	NDUFS7	1.68519655	2.028002066
			GHDC	1.201576868	1.206858734	PCNP	0.77037866	0.831938363	CRAT	1.657209049	1.29096953	DNAH10	0	0	NECTIN4	698.8	762.6
			GJB5	1.331651263	1.50372181	PCOLCE	0	0	CREBBP	1.223962489	1.223045469	DNAJA1	0.682071337	0.626204921	NEK3	1.561732168	2.610346045
			GLB1L	1.479086735	1.266910643	PDCD7	0.787616268	0.795187547	CREBZF	1.305548557	1.28585464	DNAJA2	0.805375276	0.705678056	NENF	1.210225536	1.502539733
			GLE1	1.285573437	1.366465132	PDGFRL	0.419257189	0.288360007	CRELD2	1.25417317	1.737338728	DNAJA3	0.735813743	0.741371558	NEU1	1.388145799	1.595928756
			GLI4	1.305910403	1.478880894	PDK4	0.547375221	0.338104968	CRIM1	1.253085144	1.287735124	DNAJA4	0.667566038	0.665901238	NFKB2	1.37292792	1.852240448
			GLIS2	1.354048191	1.492341066	PDLIM1	0.826306027	0.791651821	CRIP1	1.28686391	1.545296201	DNAJB1	0.794964731	0.766722871	NHSL1	1.744340879	1.467105263
			GLRX3	1.499278767	1.345293387	PDLIM5	0.640271427	0.726754844	CRK	1.256120615	1.277883891	DNAJB11	0.591524869	0.6577803	NIPSNAP3A	1.3556253	2.014471116
			GLT8D1	103.5	2.201525054	PELO	0.807371789	0.661872297	CRLF1	1.234883622	1.798019674	DNAJB4	0.672077198	0.686645799	NKAPD1	1.683330722	1.616118936
			GMEB1	1.268304132	1.229561709	PFDN5	0.575365941	0.685316012	CRTC3	1.293199113	1.315462462	DNAJC11	0.693213953	0.729418655	NLK	1.540875912	4.358670615
			GMEB2	1.41321123	1.27200251	PGBD3	0.392067124	0	CRYL1	1.289885887	1.296524541	DNAJC12	0.454892625	0.421386792	NLRP1	1.419992161	1.496310413
			GMPPA	1.236700192	1.218394016	PHGDH	0.494970622	0.388540079	CSF1	1.249557876	1.321200752	DNAJC18	0.665976896	0.765852951	NOC4L	1.256723523	1.524067758
			GNB1	1.40549871	1.201215409	PHIP	0.822566716	0.82303188	CSK	1.328474943	1.58335298	DNAJC21	0.71574036	0.83312959	NOL4L	2.100203311	3.210718392
			GNB1L	1.281402033	1.245890029	PHLDB2	0.392067124	0	CSNK1G2	1.822280626	1.640765442	DNAJC25-GNG10	0.633760475	0.782621088	NOS3	524.1	6.995642702
			GNL2	1.333891759	1.312562499	PIH1D1	0.596320746	0.699991222	CSNK2A2	1.880218657	1.23241337	DNAL4	0.646429764	0.819251577	NOTUM	1.284861257	2.126545218
			GNPDA2	1.436965291	1.328449359	PIN4	0.785114616	0.706470247	CSPG4	1.409881391	1.552718026	DNASE2	0.792979756	0.53547552	NSMCE3	1.272251674	1.313626946
			GNPTG	1.945186256	2.223547114	PISD	0.824667506	0.790859076	CST3	1.473839235	1.525928569	DNTTIP2	0.544664339	0.518608686	NT5DC2	1.270048097	1.717627173
			GOLGA1	1.45163955	1.327850005	PITPNM2	0	0	CTBP1	1.318588419	1.469953554	DOCK6	0.584461091	0.64856466	NTHL1	1.348259527	2.017096006
			GOLGA2	1.696554634	1.64644316	PLAGL1	0	0	CTDSP1	1.732171578	1.666603714	DOCK9	0	0	NTMT1	1.707430463	1.31138854
			GOLGA3	1.522551096	1.532014316	PLAT	0.546636914	0.322032709	CTDSPL	1.855484198	2.189890205	DOT1L	0.632296044	0.684183531	NUDT14	1.509032617	1.952454767
			GOLGA5	1.431780253	1.200035532	PLCB2	0.327411652	0.3	CTNNAL1	1.442486456	1.44912284	DPYSL2	0.194806354	0.59525379	NXPE3	1.402724567	1.54706514
			GOLPH3	1.461896183	1.249685536	PLPPR4	0.675171273	0.742966093	CTNNBIP1	1.237060559	1.296393478	DPYSL4	0.445265707	0.49016974	OAT	1.261574291	1.403406028
			GOLT1A	2.022431404	1.610264238	PLTP	0	0	CTPS1	1.221619859	1.433839691	DRC3	0.778560526	0.644842994	OBSCN	393.1	2.509378085
			GORASP1	1.323936581	1.447984642	PNISR	0.786376993	0.71987947	CTSD	1.704504653	1.703174766	DSE	0.531766095	0.350136716	OCRL	2.108530555	1.420618378
			GOSR2	1.358295782	1.342048347	PNMA1	0.609666371	0.832804638	CTSZ	1.419723885	1.630474549	DTL	0.803114127	0.580490533	OLFM2	1.526812942	3.69019948
			GPAT2	1.442453121	1.400438314	POLD3	0.817903447	0.653511852	CTTN	1.411808661	1.278021469	DTNA	0	0	OR51B5	1.397646483	1.214702621
			GPC1	1.54517275	1.669695996	POLR1A	0.754859073	0.658342519	CTU2	1.498117201	1.661922576	DUS3L	0.717752529	0.732773927	ORAI3	1.405280553	1.951628072
			GPR108	1.597859409	1.250808448	POLR2J2	0.577484744	0.660803363	CUEDC1	4.88941207	5.10970935	DUSP1	0.818890133	0.719960992	OSBPL10	1.248463242	1.591270088
			GPR161	1.508993064	1.873382522	POLR2J3	0.55700348	0.708885141	CUL7	1.274647004	1.444183663	DUSP14	0.731244939	0.68069659	OSBPL7	1.208632576	1.6491459
			GPR173	1.392020302	1.523572919	POR	0.68653578	0.597781581	CUTA	1.241643415	1.226652086	DUSP18	0.761539658	0.790928398	OSGIN1	1.295956225	2.023268546
			GPS1	1.266668563	1.672992681	PPP1R15A	0.81024991	0.768712516	CUX1	1.363255907	1.243276476	DUSP4	0.682609208	0.598534273	OSTM1	1.342270377	1.497137004
			GPSM1	1.297207967	1.438761973	PPP2R2C	0	0	CXCL16	1.421708185	1.322839032	DUSP6	0.744657736	0.506451089	OXCT1	1.278509564	1.55238006
			GRAMD1C	1.231433648	1.41721053	PPWD1	0.701693094	0.693480467	CXXC1	1.96287026	1.351039927	DYNC1H1	0.79136217	0.731119066	P3H1	1.243550283	1.442294684
			GRAMD4	1.261583272	1.878933668	PQBP1	0.670203536	0.694589411	CXXC5	1.29540447	1.377534193	DYNC1LI2	0.612261028	0.832923614	P4HA2	1.792602605	1.933898632
			GRB7	2.014089223	1.350715072	PRDM1	0.696915571	0.481675068	CXorf38	1.206793147	1.27987376	DYNLL2	0.609928507	0.636017751	PACS1	1.211960292	1.450468137
			GRHPR	1.239477833	1.375229866	PRDM2	0	0	CYB561D2	1.328147739	1.345769638	DYNLT1	0.787892559	0.596586534	PACS2	1.356548583	1.839239949
			GRK5	1.263506739	1.282900837	PREPL	0.794935806	0.214641679	CYB5D2	1.280498934	1.239966021	DYNLT3	0.778397941	0.781982876	PACSIN2	6.769909139	5.144269498
			GRTP1	1.507332738	1.342371677	PRIM2	0.439381587	0.46342709	CYB5R1	1.293402411	1.353232319	DYRK3	0.547474881	0.721905618	PALM3	3.664759725	15.74074074
			GSDME	1.310147449	1.572767958	PRKD2	0.738563532	0.711757942	CYB5R4	1.510428135	1.409303095	DYSF	0	0	PANO1	1.638145184	1.926133403
			GSE1	1.442747113	1.380560245	PRKD3	0.548183836	0.718106742	CYBA	1.392048447	1.814519998	E2F2	0.538327489	0.523639155	PAQR4	1.219837608	1.438560466
			GSK3A	1.428926694	1.352253549	PRKRIP1	0.756112671	0.778832189	CYC1	1.235410959	1.529896257	E2F3	0.567055207	0.534650389	PC	218.3	481.6
			GSTO1	1.286576435	1.351170028	PROM2	0.370169792	0.400092572	CYFIP1	1.624558193	1.93107271	E2F7	0.625284098	0.81960133	PCDH7	1.476130123	1.410188845
			GTDC1	1.376163326	1.246167618	PROS1	0.682524051	0.745961107	CYHR1	1.217434278	1.531374658	E2F8	0.650622827	0.782687552	PCSK7	1.696426916	1.950787042
			GTF3C3	1.61575278	1.204245971	PRPF19	0.734019786	0.745146583	CYP1A1	1.62833599	1.992618856	EBP	0.609541875	0.693099528	PDGFA	1.314680891	2.22515622
			HABP4	1.624019115	1.640639325	PRPSAP2	0.742741444	0.627143784	CYP20A1	1.297057422	1.236579441	ECD	0.806748324	0.822764115	PDGFB	1.7039953	1.655081113
			HAUS2	1.216492178	1.345205509	PRR15	0.732727176	0.701504694	CYP26B1	1.488480801	305.8	ECT2	0.58191517	0.645612154	PDGFC	1.356277399	1.401927913
			HCFC2	1.357638412	1.276886376	PRR5	0.748450131	0.798448921	CYP2R1	1.760258099	1.3485423	EDNRA	0.747022053	0.490689051	PDIA5	1.357816803	1.348821304
			HECTD3	1.28631015	1.533583482	PRRT1	0.46323972	0.484937588	CYP4F11	1.962904455	1.589367936	EED	0.667777832	0.75858443	PDPK1	1.411919096	1.411634141
			HEMK1	1.758895662	1.327275238	PRSS23	0	0	CYREN	1.249111717	1.208390592	EEF1AKMT1	0.774420378	0.639650526	PDZD7	1.52612921	2.001281248
			HGSNAT	1.406167425	1.602564912	PRSS3	0.817705887	0.726975676	CYSRT1	2.015794443	1.759532868	EEF1E1	0.709307331	0.677937496	PEG10	1.733727047	1.382732704
			HIP1	1.434638985	1.663625208	PSAT1	0.79799291	0.661923277	CYTH1	1.438435049	1.506842145	EEF2	0.819903873	0.677624058	PERP	1.437644283	1.205015955
			HLA-DMA	1.906700749	2.274570447	PSD4	0	0.714987715	CYTH3	1.458509944	1.63751003	EEF2KMT	0.696336479	0.679417739	PFKFB3	1.299630317	1.697346572
			HLA-DPB1	1.970787904	1.200292398	PSMC6	0.822337851	0.801177666	D2HGDH	1.381955215	1.826927299	EFCAB11	0.746780678	0.8304235	PGGHG	1.322686974	2.25045445
			HOXA10	1.213219251	1.36087443	PSMD10	0.708857031	0.818712658	DAG1	1.476919269	1.680058559	EFCAB2	0.720473117	0.62233992	PGS1	1.228114191	1.600299393
			HOXA13	1.287076749	1.509571817	PTCD3	0.747928676	0.670028173	DAGLA	1.338775927	1.394047286	EFCC1	0	0	PHF11	2.785435096	1.86722233
			HRAS	1.372430612	1.241407876	PTER	0.760125448	0.794835735	DAPK2	1.450148085	1.264374519	EGLN3	0.752472947	0.819181751	PHF20L1	1.335804463	1.342616908
			HS6ST2	77.6	277.8	PTGES	0.646133788	0.727801218	DAZAP1	1.23461979	1.618893416	EGR1	0.613308957	0.638151445	PHLDA2	1.254233429	1.22273898
			HSD11B1L	1.420746474	1.32892288	PTP4A1	0.252930673	0.435395189	DBNDD2	1.544364334	1.364729864	EGR3	0.438566256	0.711824099	PHLDB1	1.443500157	20.11328976
			HSDL1	1.275898447	1.326135426	PTPRM	0.802361997	0.779530088	DBNL	1.574765967	1.42244405	EHBP1	0.772163521	0.631427614	PHLPP2	1.480877467	1.699570173
			HSPA12A	1.26104481	1.254839799	PTTG1	0.816544283	0.753920406	DBP	1.467658915	1.876388104	EHD2	0.572602771	0.707360493	PIGA	1.408173909	1.777557287
			HSPG2	1.458750349	1.518446982	PXDN	0.479090456	0.555793639	DCAF15	1.24217453	1.518967889	EHHADH	0.741007091	0.825233661	PIH1D2	1.529597831	1.602426681
			HTRA2	1.297331613	1.253953331	QPCTL	0.821348779	0.801887025	DCAF5	1.66462376	1.408308923	EIF1	0.592605827	0.524092158	PIK3CD	1.287034557	2.784573271
			HTT	1.711036074	1.396935967	RAB11FIP4	0	0	DCBLD1	1.20374753	1.517571182	EIF1AX	0.628613283	0.75232301	PILRB	1.796955359	441.5
			HUS1	1.734544754	1.561590175	RAI14	0	0	DCBLD2	1.337534016	1.325854255	EIF1B	0.821032781	0.674500373	PIN1	1.242158627	1.541869398
			HYAL2	1.68901456	1.814581658	RBM41	0.583211405	0.61437361	DCTD	1.360505931	1.434968226	EIF2B1	0.801206788	0.79688485	PINK1	1.910949731	1.274476218
			IAH1	1.250979509	1.26657882	RBP1	0.647145813	0.551405221	DCTN1	1.214348981	1.427015251	EIF2S2	0.607430783	0.511354878	PIP5K1C	1.378952404	2.0481291
			IBTK	1.368422298	1.446089154	RBPMS	0.529663855	0.588644003	DCUN1D2	1.91074706	1.479259566	EIF2S3	0.813668237	0.679189597	PIP5KL1	1.623296581	1.272263268
			ICMT	1.338860684	1.422378453	RCC1L	0.791762086	0.796232212	DCUN1D3	1.497404206	1.328746642	EIF3B	0.617105565	0.759640868	PITPNM1	1.339825593	2.826779157
			ID3	1.203120721	1.459047744	RETSAT	0.754767211	0.738458392	DCUN1D4	1.422944761	1.420439769	EIF3E	0.831984623	0.706339507	PKP3	1091.9	401.4
			IFIT3	1.204093619	1.262576827	RFLNB	0	0	DDA1	1.464303612	1.270896197	EIF3L	0.7553418	0.723845452	PLCXD1	2.150776831	2.448197778
			IFNGR1	1.204680472	1.248129689	RGS12	0	0	DDB1	1.226107502	1.351696904	EIF4A1	0.712339964	0.643196028	PLD1	1.418539865	2.230639825
			IFNGR2	1.665723544	1.294493265	RGS2	0.644267118	0.658817149	DDHD1	1.504314834	1.269220738	EIF4B	0.619655276	0.489482613	PLEKHA8	1.208141925	1.737780433
			IFT20	1.473183024	1.261322879	RGS20	0.545987409	0.360298585	DDHD2	1.383935594	1.318645448	EIF4E	0.632799169	0.516861982	PLEKHG4	1.362028587	1.701940193
			IFT27	1.344238281	1.336586585	RGS4	0.211957641	0.313302259	DDIT4L	2.244280005	1.421883112	EIF4E2	0.73521741	0.753458096	PLEKHM2	1.261883478	1.39826342
			IGF1R	1.492635025	1.344001114	RHOB	0.825229222	0.706629369	DDOST	1.427794532	1.531111008	EIF4EBP1	0.565028444	0.431095437	PLEKHN1	1.339929069	1.758173888
			IGF2R	1.226891349	1.216892238	RINL	0.528120164	0.525826162	DDX51	1.201941073	1.252838251	EIF4EBP2	0.636163695	0.705131645	PLPP2	1.499991881	1.793596868
			IGFBP6	1.247464816	1.778959529	RIPK2	0.801113794	0.726335379	DDX56	1.405987391	1.27732768	EIF4G1	0.711321482	0.698728272	PNPLA6	1.618268614	2.091230552
			IGHMBP2	2.48768145	1.865922778	RLIM	0.633559526	0.65317704	DDX60L	1.454904498	1.414142206	EIF4H	0.663892057	0.818803304	POFUT2	1.216628996	1.613826614
			IKBKE	1.329194724	1.339307374	RNASEH2C	0.794179062	0.725106435	DEAF1	1.21082948	1.443563338	EIF5	0.590125496	0.61244607	POLDIP2	1.280056902	1.556170272
			IL17RD	1.393333807	1.621563328	RND1	0.639522209	0.59740288	DEGS1	1.402486671	1.285703703	EIF5A	0.67422453	0.56776065	POLR2C	1.208422643	1.374385171
			ILKAP	1.567421479	1.484557282	RNF122	0.695778233	0.696460592	DENND1A	1.629367795	1.63857494	EIF5AL1	0	0	POMT1	1.416946933	1.785294118
			IMPDH2	1.376908639	1.225997009	RNF144B	0.78924286	0.579214652	DENND3	1.571414983	1.345808151	ELAC1	0.709707016	0.761339558	PPARA	1.224691358	3.06391099
			INAFM2	1.468643198	1.778687625	RNF181	0.782030601	0.782852412	DENND5B	1.439579625	1.751175882	ELOVL1	0.639658546	0.663281713	PPIL2	1.285981945	1.462945872
			INF2	1.520653461	1.514282087	RPH3AL	0.120280612	0.163065682	DENND6A	1.282327791	1.239248939	ELP6	0.732032346	0.680403372	PPM1K	1.751833198	1.571944045
			ING2	1.349544547	1.402535526	RPL17-C18orf32	0.689173373	0.828677978	DESI2	1.409557618	1.210900861	EMB	0.797054826	0.768817419	PPP1R14C	1.242597436	1.397051269
			INPP4B	2.49091395	2.28696845	RPL23A	0.823177642	0.829371008	DFFB	1.611348763	1.608685496	EMC4	0.62039924	0.564261625	PPP1R3B	1.403703993	1.49802799
			INPP5E	1.439615973	1.285837822	RPL35A	0.771658136	0.778303117	DGKD	1.880624077	1.738198837	EMG1	0.689901505	0.654796408	PPP2R1A	349.4	1.848963475
			INPP5F	1.39987617	1.348855789	RPL38	0.787436734	0.813733972	DGKE	1.348763697	1.593355668	EML2	0.640710633	0.764930811	PPP2R5B	1.382117622	2.191632896
			INSIG1	1.369044757	1.527602715	RPL9	0.831143204	0.818493721	DGKH	1.290325905	1.303826385	EML6	0	0	PPP2R5C	1.566618843	1.519190645
			INTS11	1.495810325	1.339969291	RPP40	0.471520805	0.618303825	DGKQ	1.391113309	1.725912533	ENO1	0.66893067	0.541000011	PRADC1	1.701060465	1.495800694
			INTS4	1.424338861	1.237157481	RPS27A	0.782908924	0.819617933	DHCR7	1.397329732	1.390143196	ENOPH1	0.807676608	0.830303569	PRDM16	1.425724052	1.242367837
			INTS5	1.257214234	1.265330302	RPS6KA5	0.697400356	0.640792553	DHRS2	1.518157662	65.5	EPB41	0.457503206	0.700546588	PRICKLE1	1.215071711	3.274844873
			IP6K1	1.459854089	1.208029415	RPS6KC1	0.653741953	0.610914207	DHRS3	1.52844866	1.465541394	EPC1	0.831689394	0.784211402	PRKAA2	3.008106878	2.917470738
			IPMK	1.313258725	1.237357218	RPSAP58	0	0	DHX32	1.524677635	1.665577342	EPCAM	0.827090046	0.656189	PRKACA	436.7	1.757525999
			IPO4	1.21694601	1.244383889	RRN3	0.684203425	0.64312477	DHX33	1.323044941	1.232471152	EPHB3	0.43823416	0.404383351	PRKAG2	1.336728243	1.55789258
			IQCE	1.509550682	1.440803884	RSF1	0.821940235	0.707439598	DHX37	1.797205702	1.40087161	EPHX1	0.828787571	0.815775688	PRKCD	1.398688489	2.349204903
			IQSEC2	1.44347139	1.5555637	RTL8C	0.71757418	0.730648348	DIDO1	1.439682481	1.480032366	EPM2A	0.696955137	0.695451599	PRKCH	1.257339645	1.581546885
			IRAK1	1.313249374	1.233770531	RUFY3	0	0	DIP2C	1.25334439	1.630268304	EPOP	0.726708939	0.818690873	PROM2	2.407500915	2.665734238
			IRF9	1.667679973	1.271921372	RUSC2	0	0	DIRAS1	1.38431056	1.542722305	ERBB2	0.6525429	0.679068143	PRRX2	1.228997629	1.856686243
			IRGQ	1.51608805	1.405440089	RYR1	0.655033857	0.579075932	DIS3L	1.216718452	1.348470106	ERCC1	0.63696961	0.639852728	PRSS22	1.500211809	1.984758506
			ISG15	1.290309391	1.588592837	SAMD13	0.644750134	0.76811662	DISP2	1.410406197	1.61055385	ERCC6L	0.609544397	0.800431729	PSEN2	1.561976458	1.751507286
			ISYNA1	1.423401695	1.455457918	SAP18	0.687600912	0.694761665	DIXDC1	1.518636303	1.558258643	ERH	0.771605617	0.774416563	PSMC1	1.660752007	4.09443896
			ITGA7	1.397321607	1.311333402	SASH1	0.670018019	0.632384663	DLG1	1.325328403	1.459216736	ERI1	0.594153522	0.572400931	PSMD13	1.262228683	1.83533431
			ITGB4	1.392755234	1.236153027	SATB2	0	0	DLG3	1.821966342	152.9	ERLEC1	0.76461889	0.819385499	PSME1	1.578360394	1.696437489
			ITGBL1	6.122425629	7.430283224	SDCBP2	0.733696241	0.701592035	DLG4	3.666221272	1.440458921	ERP29	0.645570285	0.559890228	PTCH1	1.742580751	2.836882774
			JAZF1	1.546584277	3.862855799	SDHC	0.811361218	0.802808267	DLK2	1.442663784	1.354234224	ERRFI1	0.666858539	0.549080675	PTK6	1.865417166	2.795083908
			JCAD	1.583457583	1.776052263	SELENOF	0.734210934	0.825135302	DLST	1.508802148	1.340025111	ERV3-1-ZNF117	0.754099569	0.666718145	PTPN18	1.383180859	1.90460423
			JMJD4	1.500964472	1.322286429	SELL	0.704301646	0.769450533	DMPK	1.759135451	1.454281808	ESCO2	0.723651012	0.806690269	PTPRH	2.564988341	3.937922869
			JOSD2	1.538207996	1.435578792	SEMA3C	0	0	DMTN	1.416481564	1.444088668	ESPL1	0.52126101	0.538027951	PTPRU	1.388555281	2.25611923
			JUND	1.368232948	1.236064969	SENP2	0.671973491	0.756892787	DMXL2	1.28109976	1.245892911	ESYT1	0.637598174	0.782101135	PUSL1	1.221713612	1.409652255
			KANK1	1.723435617	1.268506095	SEPHS2	0.711411218	0.707005989	DNAAF5	1.437840635	1.28374829	ETFBKMT	0.72828524	0.605478242	PWWP2B	1.435330047	1.468807175
			KANK2	1.272725781	1.471756386	SERTAD3	0.594103654	0.643588636	DNAJB1	1.370867411	1.390691061	ETFDH	0.764401385	0.626065931	PXK	1.224395643	1.951548875
			KANSL1	1.277325627	1.201973757	SET	0.713519313	0.55393999	DNAJB2	1.452579189	1.596135855	ETS1	0	0	QTRT1	1.263185683	1.41587217
			KAT6A	1.678376107	1.511679975	SETSIP	0.801335559	0.822159492	DNAJC6	102.8	218.4	ETV1	0.271902618	0.546524461	QTRT2	1.359939759	1.418070763
			KAT6B	1.284258292	1.530966264	SF3B3	0.729706244	0.771880879	DNER	1.950708152	2.310714286	ETV3L	0	0	RAB26	1.253654803	2.316132275
			KAZALD1	1.381752468	1.666407769	SGK1	0	0	DNM2	1.351861556	1.311568145	ETV4	0.694521018	0.703228113	RAB3IP	1.215534787	1.573846246
			KCNC4	1.355242262	1.794684666	SGPP2	0.483300451	0.152397306	DNMT3A	1.852045691	1.896830849	ETV5	0.54736149	0.534260958	RAB5C	1.224689565	1.540468972
			KCNH2	1.860598876	2.305373365	SH3BGRL2	0.520699113	0.378253107	DOCK3	1.65272156	1.394715298	ETV7	0.284449839	0.606741573	RAB6B	1.719662966	2.712550282
			KCNN4	1.444031889	1.25295842	SH3BP5L	0.804969692	0.737187114	DOCK5	1.346703236	1.364391564	EVA1A	0.03396037	0.031429371	RABL2A	1.230308668	1.667729448
			KCNS3	1.894554601	1.61833123	SH3PXD2A	0	0	DOK4	1.357187545	1.433710988	EXOC6B	0.664962349	0.635228816	RAC2	1.589617423	2.864296321
			KCTD11	1.278982444	1.411675025	SIAE	0.816166966	0.792906846	DONSON	1.344832737	1.437623057	EXOC7	0.688773156	0.605873117	RASA3	1.39650889	1.370759993
			KCTD12	1.445722327	1.585911209	SLC11A2	0.724386233	0.603280939	DPH7	1.406703029	1.235064657	EXOSC2	0.762351655	0.739266106	RBL2	1.402636963	2.266101115
			KCTD14	1.573550877	1.332710659	SLC16A7	0.602141838	0.726212286	DPP7	1.410396403	1.655010804	EXOSC6	0.71333589	0.826317851	RBM24	1.346184424	2.129024819
			KCTD18	1.322460007	1.346615975	SLC1A3	0.733654065	0.665869294	DPY19L1	1.61069451	1.626176871	EXOSC8	0.62726251	0.57585448	RBM5	1.33674998	1.816326952
			KCTD2	1.326335588	1.207993523	SLC20A2	0	0.06294036	DPYSL5	1.871270582	2.232310698	EXOSC9	0.833134863	0.742140357	RC3H1	1.629530917	4.37254902
			KCTD6	1.285055472	1.360532608	SLC25A14	0.790331597	0.818196439	DRG1	1.394806455	1.558817724	EXPH5	0.699000076	0.633573081	RELA	1.277938162	1.638204121
			KDELR2	1.521838559	1.42493832	SLC25A16	0.743366729	0.749858703	DRG2	1.446589107	1.340454236	EZH2	0.791182214	0.78194427	RELB	1.228618311	3.265226957
			KDELR3	1.39143434	1.661852679	SLC25A21	0.611452998	0.694872436	DSC2	1.355278119	1.243302481	F12	0	0	RETREG2	1.306171075	1.275635877
			KDF1	1.356237638	1.490756314	SLC26A4	0	0	DTD1	1.207854159	1.2352891	F2RL1	0.766619747	0.6400225	RETREG3	1.21978131	1.230737956
			KIAA0100	1.709825533	1.21467599	SLC2A11	0.709989041	0.408886921	DTNB	1.532714232	1.226581553	FAIM	0.771931814	0.810548929	REXO4	1.45495118	1.588421589
			KIAA0895L	1.319940757	1.363402739	SLC2A12	0.407630482	0.491144175	DTX4	1.363320181	1.525755066	FAM111B	0.529385498	0.662473927	RFNG	1.421178077	2.411962438
			KIAA1522	1.368855973	1.58465737	SLC2A3	0	0.326750449	DUS1L	1.449631673	1.552692486	FAM117A	0.660688542	0.616631746	RFT1	1.200394586	1.25179271
			KIAA1549	1.239826956	1.59594955	SLC30A7	0.655858947	0.596391286	DUSP22	1.845719365	1.633025941	FAM118A	0.684563758	0.620400969	RGCC	1.404007393	2.954781158
			KIAA1671	1.362672616	1.220064084	SLC38A1	0.802678697	0.24407976	DUSP23	1.395008639	1.922020882	FAM120C	0.629996772	0.667894607	RGPD4	1.738308458	120.4
			KIF16B	1.451048433	1.209728681	SLC4A7	0.728924198	0.661650055	DUSP28	1.281389544	1.397861061	FAM133B	0.715314939	0.802316843	RGS9	1.219258424	1.559176378
			KIF1C	1.492800022	1.389190998	SLC6A8	0.564069231	0.689627184	DUT	1.223298814	1.394026903	FAM136A	0.795110762	0.683899545	RHBDF1	2.032770163	5.667525508
			KIFAP3	1.994075829	1.554123984	SLC7A1	0.806418067	0.655472044	DVL1	1.352047839	1.709229384	FAM13A	0.72148946	0.692271162	RHOC	1.409748225	1.738926136
			KIFC2	1.457268112	1.968028922	SLC7A11	0.589686724	0.398814981	DYNC2H1	1.934647598	1.581235698	FAM13B	0.74983461	0.790893011	RHOD	1.300028229	2.146386168
			KIRREL1	1.204638067	1.711942388	SLC7A8	0.65303946	0.525978696	DYRK1A	1.252224293	1.219157699	FAM149B1	0.80382397	0.830110986	RHOT1	1.209202405	1.465405581
			KISS1R	1.332000463	1.676478378	SLFN13	0	0	DYRK2	1.573023071	1.823886706	FAM160A1	0.70812475	0.794335049	RIMBP3B	1.349642066	1.770880876
			KLC3	1.243949178	1.326631846	SMAD1	0.817138165	0.811018254	DZIP1L	1.22587656	1.202272128	FAM167A	0.74180122	0.69342773	RIMBP3C	2.998474447	227.4
			KLF16	1.252269376	1.379420056	SMAD7	0.358819837	0.342294055	E2F4	1.258832958	1.722344227	FAM172A	0.720704407	0.764569907	RIMKLA	1.271129969	2.804034351
			KLF2	1.520302921	1.487907526	SMARCA1	0.641792949	0.601648405	EBAG9	1.341602975	1.261634847	FAM174A	0.595260011	0.736286836	RIOK3	1.890016485	1.556661221
			KLHL2	1.344964473	1.267398805	SMIM14	0	0	EBF2	1.218684752	1.219739776	FAM189B	0.596497943	0.662457764	RIPK4	1.268066337	1.988108601
			KLHL21	1.449690322	1.262121861	SMPDL3A	0.769907417	0.623509962	ECE1	2.035024034	1.487721358	FAM200B	0.663604416	0.577908888	RNASEL	1.2996802	1.696437489
			KLHL22	1.443392112	1.492280402	SMPDL3B	0.729976651	0.599802593	ECHDC3	1.923098319	1.725998832	FAM229B	0.665499175	0.448905561	RNF111	1.237877513	1.775376829
			KLHL35	1.984634629	1.651344934	SMTN	0.66755104	0.784106783	ECHS1	1.326305503	1.223287792	FAM241A	0.728810704	0.713576172	RNF166	1.425610781	2.06695314
			KLK10	2.993795753	2.210025025	SNAI1	0.768237474	0.773393416	ECM1	1.211777302	2.12780941	FAM3C	0.717731761	0.546372576	RNF214	1.589594481	1.974980629
			KLK5	1.651100597	1.662388944	SNCG	0	0	ECSIT	1.252460145	1.240692099	FAM43A	0.624224637	0.720925729	RPH3AL	5.195089286	6.1970066
			KLK6	1.384341804	1.960096357	SNRNP40	0.78020865	0.784803713	EDEM1	1.429979455	1.292844968	FAM53C	0.468877775	0.315073698	RPL12	1.30074315	1.624950184
			KMT2B	1.452673861	1.53920198	SNRPD2	0.765104754	0.756060959	EEF1A2	1.353066391	1.470344937	FAM72A	0.346008752	0.312854187	RPL17-C18orf32	1.239546759	1.437213799
			KREMEN1	1.545035944	1.909105423	SNRPE	0.677407087	0.637365799	EEF1B2	1.409403776	1.517131925	FAM72B	0.346164883	0.334409498	RPS6KB1	1.237276156	1.412254582
			KRT15	2.723965763	3.188203018	SNW1	0.791983452	0.728396439	EEF2K	1.225254937	1.231930426	FAM72C	0.234998947	0.727868447	RPS6KL1	1.648002535	2.318179232
			KRT19	1.994944637	1.499861121	SORBS3	0	0	EFCAB14	1.765169695	1.566879254	FAM72D	0.574140439	0.445145019	RPUSD3	1.210678701	1.242647545
			KSR1	1.895314382	1.520515144	SORT1	0.735892109	0.761322225	EFHD2	1.60607389	1.581558111	FAM83D	0.652542552	0.719282783	RRAGC	1.440754883	1.582200177
			KYAT1	1.409604897	1.224811643	SOWAHB	0.713991175	0.774165624	EFNA2	1.248960168	1.270797825	FANCB	0.828305815	0.661475972	RRP8	1.290908238	1.433324711
			LAMA5	1.468436496	1.724958565	SPA17	0.822623644	0.789312492	EFNA3	1.333011893	1.201675458	FANCC	0.680670929	0.709506364	RSU1	1.33844295	1.279239451
			LAMB3	1.887665526	1.294856942	SPARC	0	0	EFR3A	1.42913529	1.450194451	FANCG	0.647248381	0.796292992	RTBDN	1.816485575	1.229292288
			LAMC1	1.277637392	1.201253561	SPC25	0.752655316	0.767782829	EFR3B	1.394847068	1.361755001	FANCL	0.647201678	0.692356313	RTN4RL1	1.517430653	2.556380259
			LARS2	1.24001172	1.228166228	SPIB	0.203946064	0.335148819	EGFR	1.276008813	1.344603234	FANK1	0.708209521	0.742343542	RUSC1	1.444025947	2.199245906
			LDB1	1.206159542	1.258377763	SPICE1	0.795840584	0.587762981	EGLN1	1.267581339	1.220979791	FARP2	0.628408753	0.66057469	RXRA	1.593703905	3.210686897
			LDLRAP1	1.396268127	1.284736702	SPIN2A	0.494286008	0.356935367	EHMT1	1.257291489	1.689912329	FARS2	0.737579239	0.733338236	S100A2	2.190770774	10.93137255
			LGALS9	129.4	101	SPOCK3	0.30323733	0.345765465	EIF2AK4	1.333213046	1.601291455	FAT4	0.492591488	0.707271374	S100A5	4.95386772	3.387081927
			LGALSL	1.399442934	1.282535465	SPOP	0	0.239400585	EIF2D	1.246375165	1.475634971	FBL	0.604364537	0.645386545	SAMD11	1.387940543	2.734958862
			LHPP	1.318771549	1.399450259	SPTSSB	0.465121464	0.365383157	EIF3B	1.361020746	1.311467475	FBLIM1	0	0.180401558	SAMD12	1.472979801	2.185537002
			LIF	7.591913241	5.52790682	SRC	0.371606573	0.091882623	EIF3C	1.274565185	2.275	FBXO16	0.748429865	0.660048785	SAMHD1	1.304669429	1.51075228
			LITAF	1.467789031	1.281591124	SRMS	0.332815775	0.524203707	EIF4E3	1.919786562	1.289685608	FBXO21	0.759609033	0.688449368	SAP130	1.23584597	1.272466992
			LMBR1	1.333464189	1.262840394	SRP72	0.716476207	0.688478894	EIF4ENIF1	1.512512672	1.415652053	FBXO27	0.76515377	0.825469714	SARM1	1.895826377	1.512482336
			LMBRD2	1.204137215	1.560194527	SRRM5	0	0	EIF4G3	1.340771307	1.324240571	FBXO32	0.694510699	0.659782609	SAT2	1.251481007	1.314846774
			LMCD1	1.340335882	1.406029757	SRSF8	0.772467812	0.766351394	ELF2	1.201270273	1.517642347	FBXO34	0.828830172	0.797359269	SATB1	2.460357696	3.199261993
			LMF2	1.211950773	1.374493497	ST6GAL1	0.688663145	0.700519634	ELFN2	1.706499968	1.567444023	FBXO8	0.624378443	0.543438523	SBDS	1.29541312	1.615897246
			LMTK2	1.555032569	1.314135715	ST7	0.395521	0.229957326	ELL2	1.225299405	1.237216028	FDXACB1	0.789563516	0.831153201	SCAPER	1.420047623	1.302839117
			LRAT	1.219865132	1.411744309	ST8SIA1	0	0	ELMO2	1.569032311	2.678958398	FDXR	0.718757377	0.80439775	SCN3B	1.290132004	3.919350748
			LRFN1	1.279479712	1.863314749	STAM	0.813650951	0.715935543	ELMO3	1.294757201	1.383528385	FEM1C	0.498660091	0.40657301	SCUBE1	1.302537886	2.351174847
			LRFN3	2.217377562	1.404867257	STK24	0	0.553191489	ELOB	1.36024607	1.4080939	FGF2	0.640550968	0.618061876	SCYL1	1.783847877	2.012037135
			LRFN4	1.3604168	1.507105043	SULT2B1	0.098279159	0.113616652	ELOF1	274.3	262.1	FGGY	0.726169348	0.74258194	SDHAF1	1.279930229	2.103338725
			LRP5L	1.231585284	1.307653936	SUMO1	0.777062889	0.60454387	EMC3	1.632645071	1.348719045	FHL2	0.655958411	0.694302442	SDHD	1.684053217	1.639437279
			LRRC26	1.726224531	2.103967813	SUMO4	0	0.717840376	EMD	1.69423252	1.606962032	FKBP1B	0.629871	0.633046492	SEC24A	1.579622412	1.873630172
			LRRC3	1.41112625	1.712122105	SUSD4	0.718291832	0.432150864	EML1	1.527658382	2.377322452	FLAD1	0.650543016	0.578287031	SECTM1	1.989755065	4.593804061
			LRRC42	1.479310345	1.375929332	SUV39H1	0.809568776	0.514361953	EML5	1.648233423	1.668151831	FLNB	0.660757323	0.62497405	SELENOO	1.333047935	1.63108951
			LRRC47	1.522288019	1.235014187	SVIL	0.615885888	0.536878924	EMP3	1.528067033	1.66401814	FMC1	0.725447679	0.826918369	SELENOS	1.37930008	1.659700241
			LRRC56	1.271484148	1.259442486	SYAP1	0.825423693	0.723760785	ENDOG	1.377625347	1.412759963	FMO4	0.790832651	0.675198024	SEMA3A	1.240274753	1.278526188
			LRRC57	1.216492178	1.348120121	SYF2	0.791641946	0.601459762	ENDOV	1.375874723	1.391934717	FN1	0.688218919	0.705743545	SEMA3B	1.675157392	2.228157683
			LRRC8A	1.385033193	1.216900047	SYMPK	0.813867169	0.771219722	ENHO	1.560639786	1.647483968	FN3K	0.115907597	0.0782837	SEMA4G	1.744340879	3.497821351
			LSG1	1.243090186	1.254872626	SYNGR1	0	0	ENKD1	1.747695766	1.745049408	FNBP4	0.704829588	0.535606185	SESN1	1.239731579	1.446902903
			LSM14B	1.52610146	1.303139438	SYPL2	0.708994263	0.787565688	ENO1	1.270132288	1.329910041	FOCAD	0.516751775	0.669309776	SFT2D1	1.637059997	1.239862464
			LTBP1	1.200616203	1.547480231	SYS1	0.775972022	0.416825672	ENOX1	1.45257901	1.208388461	FOLR1	0	0	SFXN3	1.542710643	2.001040853
			LTBP4	1.297467762	1.339237772	SYT15	0	0	ENPP1	1.304979514	1.380109972	FOSB	0.55687397	0.564433365	SGCE	1.592764708	1.404766651
			LTBR	1.579430393	1.507151158	SYTL3	0.626754191	0.497309162	ENTPD2	1.728746994	1.815608203	FOSL1	0.795658967	0.685619677	SH2B1	1.276831611	1.627123526
			LYST	2.585413695	7.447993448	TACC1	0	0	ENTPD5	1.475508301	1.380280992	FOSL2	0.805611286	0.763406278	SH3BGR	1.264453264	1.445958811
			LZTS2	1.393283822	1.482634812	TAF11	0.788047102	0.742672284	EOGT	1.308148858	1.323002206	FOXD3	0.805392711	0.651787921	SH3BP4	1.299127503	9.733662145
			MAF1	1.550983884	1.311383795	TAF9B	0.730184781	0.774127331	EPAS1	1.79382673	2.023630598	FOXP1	0.775002174	0.577270336	SH3RF2	1.310035133	1.437796016
			MAFK	1.697186176	1.287591532	TANGO6	0.786078255	0.77837156	EPB41L4A	2.868533571	2.038854588	FOXRED1	0.661464343	0.779865516	SH3TC1	1.20494339	2.774621901
			MAML2	1.575429894	2.336891131	TANK	0.358351021	0.235454253	EPB41L4B	1.398578047	1.236916652	FOXRED2	0.577183006	0.705878348	SHROOM2	1.774366358	1.385418874
			MAN1A2	1.404288181	1.318793953	TARS2	0.658538331	0.717855673	EPM2A	1.226794891	1.264695249	FRA10AC1	0.537767264	0.51520065	SIPA1	1.537670751	2.481181319
			MAN1C1	1.307306895	1.682374666	TBC1D19	0.635401392	0.36550379	EPS8L2	1.795523027	1.946851428	FRAS1	0.705074758	0.613449427	SIRT3	1.219898748	1.741211175
			MAN2B2	1.200138067	1.314598163	TBC1D5	0	0.319078947	ERAP1	1.288890937	1.47778699	FRAT2	0.796806674	0.726682295	SLC12A6	2.204572447	1.279402066
			MANF	1.281864617	1.222402713	TBL1XR1	0.761137185	0.790861503	ERF	1.22393653	1.309358752	FSCN1	0.759873573	0.68496655	SLC12A8	2.113456193	1.272508242
			MAP1LC3B2	1.726865103	1.639606474	TCEA2	0	0	ERGIC1	1.614690645	1.224615101	FSD1	0.517895569	0.729956669	SLC15A1	305.7	1003.5
			MAP1S	1.269531345	1.215814339	TEX45	0.122345172	0.330082418	ERI1	1.386946724	1.373850039	FTH1	0.769667741	0.576522651	SLC16A3	1.97725215	2.672467695
			MAP2	1.291241876	1.25694573	TFPT	0.737255564	0.683978747	ERICH1	1.27643456	1.407940532	FUBP1	0.673604429	0.669961312	SLC22A18	1.296934652	1.338458939
			MAP2K5	1.590047326	1.274242389	TICAM2	0.333847152	0.508044195	ERLIN2	1.372044293	1.284970932	FUCA2	0.739935354	0.655581825	SLC22A18AS	1.747647342	2.028246273
			MAP2K7	1.536725712	1.225385528	TIMM17B	0.669088771	0.691509817	ERMAP	1.20302324	1.550919826	FUNDC1	0.723057676	0.622697767	SLC25A20	1.353009644	1.657729935
			MAP3K12	1.296262809	2.661431065	TIMM44	0.814360507	0.706124485	ESAM	1.54071891	1.268630898	FUZ	0.750471123	0.591727173	SLC25A22	1.363825069	2.615406313
			MAP4K5	1.231653823	1.234187771	TIMP2	0.695833878	0.78332553	ESPN	1.259516807	1.205482255	FXR2	0.695358177	0.732817481	SLC25A25	611.4	1.507511737
			MAPK11	1.659654198	2.580965323	TIMP3	0.345602514	0.468509838	ESYT2	1.763973575	1.634424145	FXYD1	0	0	SLC25A4	1.29231964	1.546656617
			MAPK12	1.225767303	1.561982539	TLL2	0.508276191	0.696545161	ETNK2	1.267073492	1.324701485	G3BP1	0.697029265	0.586479494	SLC27A4	1.454004364	1.745651798
			MAPRE2	1.383610451	505.2	TLR6	0.762919907	0.659201337	ETS2	1.954131247	2.021702459	G3BP2	0.778832994	0.759329723	SLC27A5	3.714945322	2.811950549
			MARK3	1.242296481	1.405273842	TMCO1	0.689397175	0.634528939	ETV3	1.458337762	1.2772797	GABARAPL1	0.76962497	0.785649926	SLC29A4	1.701168614	240.8
			MARVELD3	1.232725914	1.344942163	TMEM101	0.787624298	0.797830243	EVA1C	1.235449905	1.247867421	GABPB1	0.686101707	0.69510061	SLC30A4	1.296807247	2.129939279
			MAST2	1.445580691	1.247934981	TMEM109	0.783093815	0.832276168	EVI5L	1.354409625	1.324081759	GABPB2	0.64598287	0.634053275	SLC35D1	1.312780702	1.522406341
			MAST3	1.440993467	1.792898898	TMEM116	0.749523742	0.758459023	EXD3	1.928059808	1.777953777	GADD45A	0.63509988	0.601210811	SLC36A1	1.572978275	1.203564218
			MAST4	3.685541643	4.410440816	TMEM125	0.591942735	0.636286804	EXOC3	1.732770415	1.234762485	GADD45B	0.639318263	0.614566986	SLC38A7	1.320098915	1.581678875
			MBD1	1.597057824	1.281262685	TMEM126A	0.73788806	0.747231276	EXT2	1.452373032	1.299320326	GALM	0.703232022	0.789927946	SLC46A1	1.317835209	1.601879738
			MBNL3	1.449127003	1.626906318	TMEM144	0.779940472	0.800088676	EXTL3	1.44503424	1.289234061	GALNT10	0.581580398	0.739314994	SLC4A11	1.37752599	1.969866193
			MCF2L	1.472621836	1.268124776	TMEM200A	0.464061569	0.330598917	EZR	1.713998889	1.61393702	GATAD2B	0.590599177	0.640220993	SLC4A2	1.476294906	1.722811761
			MCM3AP	1.276592652	1.213489054	TMEM265	0.469767161	0.606563818	F10	4.099743656	3.624015748	GCDH	0.602558451	0.751659795	SLC52A2	1.285521483	2.151646987
			MDK	1.697826913	1.860839412	TMEM40	0.483755289	0.704123597	F8A1	1.444325482	3.439548819	GCNT3	0.558962546	0.48891028	SLC5A3	1.507524053	1.574406798
			MDM1	1.254749456	1.321133412	TMEM79	0.295028681	0.770877441	F8A2	1.454632207	3.227963526	GDA	0.79632431	0.677386129	SLC5A5	131	120.4
			MED1	1.304311724	1.231986152	TMEM98	0.782598988	0.813089651	F8A3	1.670343493	5.864426419	GDAP1	0.461539668	0.563538787	SLCO3A1	1.289444936	2.092178116
			MED25	1.720658553	1.255741665	TMSB15A	0.705919926	0.830608177	FAAP20	1.92970118	1.449516467	GDE1	0.672957236	0.756214372	SLX4	1.208342231	1.427512475
			MEGF11	1.290319566	1.863984235	TMSB4X	0.798181285	0.664482521	FADD	1.327022735	1.324603962	GDPD3	0.635048785	0.786358715	SMAD7	2.6260724	3.210686897
			MEGF9	1.205448192	1.351796022	TNFSF9	0.47339268	0.620097843	FADS1	1.241346957	1.43607251	GEM	0.596505399	0.706138806	SMARCD3	1.279151346	1.988170199
			MELTF	1.292314006	1.753577182	TNKS	0.782121005	0.624506625	FADS3	1.233106778	1.237858528	GEMIN8	0.59190537	0.68669024	SMIM12	1.516659731	2.230472319
			METRN	1.538996399	2.145471039	TNKS1BP1	0.778376883	0.501929991	FAH	1.427991339	1.51602229	GFY	0	0	SMPD1	1.298047341	2.352703559
			METTL22	1.637296415	1.204332958	TNNC1	0.496345611	0.554019782	FAM102A	1.275955385	1.274504959	GGA1	0.82500319	0.818245308	SNX1	1.499837187	1.525910245
			METTL25	1.7272007	1.232531991	TNNT1	0.423163958	0.64692333	FAM102B	1.366831741	1.581596621	GGA2	0.72339908	0.827611044	SNX2	1.469662004	1.563024856
			METTL26	1.498282948	1.64368665	TP53	0.743465915	0.710792209	FAM104A	1.393651329	1.297547981	GHITM	0.81500265	0.402558356	SNX4	1.359162742	1.325857063
			METTL5	1.595581609	1.409406307	TRAK1	0	0	FAM110C	1.640169115	1.437727702	GIN1	0.75681922	0.603085736	SNX7	1.207768298	2.057323089
			METTL9	1.360711944	1.221524408	TRIM36	0	0	FAM114A1	2.019014667	1.653913559	GINS4	0.66826445	0.593548828	SOX8	1.814537405	1.999935294
			MEX3B	1.430904888	2.062994219	TRIM39-RPP21	0.457092041	0.051441137	FAM118B	1.234933747	1.218862711	GLA	0.622825879	0.727097508	SPARC	393.1	160.5
			MEX3D	1.316799565	1.669496623	TRIML2	0	0.358511221	FAM124A	1.315850158	1.637510152	GLCCI1	0.522612352	0.706949536	SPATA33	1.292506182	1.717279161
			MFAP2	1.258840588	1.609750491	TRPV3	0.527605265	0.735154394	FAM13B	1.392063272	1.250886806	GLI1	0.595354259	0.702808537	SPCS2	1.20638875	1.449031729
			MFSD13A	1.438000839	1.30285391	TSEN15	0.809965641	0.547554296	FAM160B1	1.414285228	1.512306874	GLRX	0.681996587	0.57424548	SPNS2	1.222446572	1.880333873
			MFSD5	1.342643759	1.393889693	TSPYL1	0.811976247	0.682313855	FAM160B2	1.244267334	2.076726437	GLS	0.524535738	0.583196664	SPTBN4	1.453395473	280.9
			MFSD6	1.252643522	1.342698556	TSPYL2	0.762466648	0.680749043	FAM168B	1.350866927	1.471865462	GLYCTK	0.762924304	0.6706089	SRC	2.050713297	1.649293086
			MGAT5	1.264331458	1.23514432	TSPYL4	0.511262899	0.385697809	FAM169A	1.332515151	1.269571761	GMNN	0.623817075	0.755649021	SRPX2	1.616245545	1.496624175
			MGLL	2.129047286	2.396100835	TSR2	0.726704402	0.784003578	FAM189A2	1.817279771	2.122778675	GMPS	0.789896256	0.698994375	SSH3	1.445380159	2.09779856
			MGMT	1.30523529	1.264462118	TTC19	0.786653884	0.746905529	FAM20B	1.341881769	1.641696339	GNAI1	0.69529945	0.709689655	SSTR5	1.608772924	2.649260733
			MIB1	1.320458916	1.372904153	TTC30B	0.67212298	0.581652825	FAM20C	1.789528902	1.651705354	GNB2	0.679085725	0.817882799	STAM2	1.299509197	1.452960054
			MICAL3	1.442247547	2.133040757	TTC32	0.693811673	0.739820939	FAM210B	1.288151932	1.867232963	GNG7	0.606261567	0.827970297	STAT3	1.432306611	1.696289213
			MICALCL	2.34355071	1.556972911	TTC39A	0	0	FAM214A	1.37693766	1.500412088	GNL3	0.429432254	0.359331406	STEAP3	1.351953138	1.907188435
			MID1	2.751992914	1.497804128	TTK	0.752376145	0.711574234	FAM214B	1.312492641	1.352115717	GNPDA1	0.826029374	0.794563667	STRADB	1.274330766	1.525230323
			MIDN	1.361510275	1.297137932	TUBA8	0	0	FAM222B	1.610504219	1.495409605	GOLPH3L	0.617901056	0.506366346	STX12	1.372599901	1.273894093
			MIF	1.208737844	1.220104916	TUBB6	0.674959113	0.752445191	FAM241B	1.222815266	2.060250905	GOT1	0.759565636	0.55720447	STX18	1.276945219	1.598749659
			MINK1	1.452020377	1.491910432	TUFT1	0.506220623	0.567559197	FAM3A	1.477487214	1.730576419	GPATCH3	0.798488285	0.633201228	STX1A	1.295474785	1.288414975
			MIOS	1.424948057	1.254960905	TWNK	0.791537367	0.784661593	FAM3C	1.291528917	1.262207333	GPC2	0.631715905	0.707949042	STX3	1.296023507	1.520907795
			MISP3	1.409349522	1.268858835	TXNRD1	0.777779025	0.639531489	FAM47E-STBD1	1.786093339	1.517039299	GPER1	0.453970655	0.513066318	STX4	1.375691746	1.925216791
			MKNK2	1.434897549	1.311401328	UBA5	0	0	FAM83F	1.457534493	1.750276938	GPR155	0.651746785	0.547362065	STX7	1.384786373	1.59365236
			MKRN2	1.221856511	1.207747451	UBALD2	0.784880425	0.658414318	FAM83G	1.23828441	1.556534332	GPR158	0.4099489	0.771466417	STX8	1.261240318	1.650840221
			MKS1	1.602709608	1.381493791	UBAP2	0.620765705	0.714160948	FAM83H	1.366389544	1.663087779	GPR173	0.644522769	0.822112649	STXBP1	1.277507811	1.68691777
			MLEC	1.263837427	1.200701332	UBE2L6	0.714301314	0.730226995	FAM86B2	1.203133654	1.424224481	GPR19	0.735929142	0.589655739	SUDS3	1.285824161	1.821434465
			MLLT1	1.447876642	1.435049787	UFSP2	0.785557788	0.738953299	FAM89A	1.731893685	1.688292106	GPRASP2	0.233594864	0.170744681	SULT1A1	2.146793327	2.194767853
			MLLT6	1.25852243	1.394650358	ULBP1	0.819461544	0.556531296	FANCA	1.374789764	1.389931877	GPRC5C	0.804433011	0.78596507	SULT1A2	1.786482933	2.147633549
			MLST8	1.464220041	1.269055748	UPK1A	0	0	FANCE	1.594901452	1.924071822	GPT2	0.823479311	0.448730469	SUSD2	1.704806513	1.874587912
			MLX	1.927921954	2.425065336	UPK3B	0.733773181	0.554019782	FAR1	1.692067154	1.616656283	GPX4	0.781869563	0.740552481	SUSD4	1.982080521	3.22893314
			MMP25	1.207719539	1.283566871	USF1	0.63522103	0.706197145	FASTK	1.249814202	1.453522133	GPX8	0.500424739	0.448675562	SYCP3	2.665141114	3.227339181
			MMRN2	2.484008529	3.31040131	USP49	0.516264	0.639597979	FBLIM1	4.767116236	7.496403956	GRB10	0	0	SYDE2	1.396481602	1.494374732
			MNX1	1.366664553	1.446879478	USP6NL	0	0	FBLN1	1.375634911	1.871238115	GREB1L	0.626177829	0.813826025	SYNC	1.366759121	2.564291986
			MOB1A	1.288345437	1.243955869	UTP14C	0	0.615023474	FBLN5	1.513077044	1.368119094	GRPEL2	0.794281137	0.633592224	SYNGR3	1.448346229	1.352205149
			MOCS1	1.303326103	1.488275448	UTRN	0	0	FBN3	1.322519202	2.033355336	GSTM2	0	0	SYNJ2	1.241472918	1.643054947
			MOSMO	1.323970729	1.255396966	VAMP4	0.792314312	0.773429642	FBRSL1	1.258431696	1.337117775	GTF2A1	0.791831614	0.725341946	SYNJ2BP	1.352743451	1.54577105
			MPC1	1.530502888	1.483231677	VCAN	0.498445635	0.279079525	FBXL16	1.427193051	1.735934897	GTF2H3	0.796523483	0.794687488	SYNJ2BP-COX16	1.352743451	1.54577105
			MPPE1	1.223658258	1.2571344	VCPIP1	0.807069058	0.590325406	FBXL18	1.450023257	1.71469886	GTF2IRD2	0.618750531	0.740351761	TACSTD2	4.795488119	4.068161226
			MPZL1	1.385483341	1.338478894	VIPR1	0.686811352	0.239506173	FBXL2	1.449170849	1.464581332	GTF3C6	0.820977777	0.782251398	TADA2B	1.410169398	1.233150953
			MRGBP	1.286321167	1.201796769	VPS72	0.829991898	0.607414468	FBXL6	1.296333344	1.569839925	GTPBP1	0.680966129	0.816887257	TAF3	1.461686915	1.297822356
			MRM1	1.327625857	1.377783059	VWA5A	0.528787343	0.691687623	FBXO10	1.500121507	1.699581089	GTPBP10	0.808213488	0.817308784	TANC1	1.202642192	1.292186358
			MROH1	1.418810343	1.354167781	WASHC1	0.42304134	0.645635739	FBXO2	2.236453557	2.127681943	GTPBP2	0.782622435	0.625879217	TAOK2	1.20320197	1.229087739
			MROH6	1.241826074	1.525442149	WBP1L	0	0.358511221	FBXO27	1.364669445	1.407862451	GTPBP4	0.729728011	0.773975851	TARBP2	1.471485806	1.758859221
			MRPL12	1.26773803	1.232478614	WDPCP	0.813725583	0.76498966	FBXO31	2.02410984	1.556714785	GTSF1	0.620320505	0.387829624	TBC1D1	1.259309817	1.549077491
			MRPL2	1.355489911	1.204442544	WDR48	0.819418751	0.579219902	FBXO41	1.215815658	1.840076433	GXYLT1	0.775918679	0.798572925	TBC1D10A	1.253515876	1.554916112
			MRPL21	2.479106984	1.862661358	WDR54	0.69398085	0.615975658	FBXO44	2.215043334	2.145938219	GZF1	0.768874825	0.763433982	TBCB	1.237618173	1.348869382
			MRPL36	1.497261259	1.379425059	WDR6	0.830982924	0.770090013	FBXO5	1.231747862	1.337599609	HACD2	0.703387646	0.672079941	TBP	1.385642782	1.303489959
			MRPL41	1.260786869	1.436887879	WDR83OS	0.757181532	0.75657327	FBXO6	1.391056187	1.233641004	HADHA	0.697956821	0.808910803	TBRG1	1.221717187	1.634374584
			MRPS23	1.331369818	1.291301624	WLS	0.659176624	0.646298679	FBXO7	1.44844105	1.260848239	HADHB	0.696806922	0.809258496	TBXA2R	1.639446426	3.231517364
			MRPS5	1.264163143	1.557856857	WRAP53	0.797167287	0.716324132	FBXO9	1.387575054	1.231604234	HAPLN3	0.536096853	0.6461167	TCEA2	131	120.4
			MRPS6	1.664983559	1.332302041	WSB2	0.646023785	0.601287436	FCHSD2	1.536608408	1.467335992	HAT1	0.808897	0.633029947	TCEA3	655.1	2.633858268
			MSANTD4	1.527706482	1.554238333	XPOT	0.807911129	0.785121186	FES	2.125775022	2.154952733	HAUS1	0.596895713	0.549488602	TCP11L2	1.802163488	1.324176934
			MSI1	1.309338387	1.21956694	ZBTB20	0.399289789	0.652890858	FGF18	2.021876628	2.256244666	HAUS5	0.565175557	0.587189894	TCTN2	1.355185876	1.436122904
			MSL3	1.685765777	1.367988586	ZBTB38	0	0.536445536	FGF9	1.53937725	1.279864374	HBP1	0.693655499	0.404208664	TDRD7	1.373973949	2.019734693
			MSLN	1.532249827	1.391610758	ZBTB6	0.794809266	0.808189102	FGFBP1	2.077959143	3.066204419	HBS1L	0.826511105	0.827687661	TECPR2	1.209274402	1.547174233
			MSRB3	1.446708764	1.341549072	ZC3H15	0.778609847	0.799169775	FGFR3	1.285136683	1.747515939	HCCS	0.633030182	0.706317956	TESK1	1.267687391	1.676191873
			MT2A	1.226428945	1.240315462	ZCCHC17	0.781217582	0.787345093	FGFR4	1.418469465	1.970149708	HDAC1	0.621952524	0.619368687	TEX261	1.212025525	1.565546191
			MTA1	1.308296884	1.355142219	ZCCHC8	0.828689307	0.693399943	FHL1	1.321948608	1.781401741	HDAC4	0.640411352	0.702402745	TFEB	1.391623569	1.747954605
			MTCL1	1.425022051	1.42343361	ZGRF1	0.82479197	0.6425587	FHL3	1.43407478	1.267355911	HDAC5	0.708951739	0.610843068	TGDS	1.250660129	1.390594104
			MTFMT	1.42558134	1.223580278	ZHX2	0.620752064	0.537343315	FHOD3	1.475391485	2.466625787	HDAC6	0.736742231	0.714037385	TGFA	1.246236081	1.574752276
			MTHFR	1.72668557	2.714468085	ZKSCAN4	0.805161998	0.601499419	FIBCD1	1.324947812	1.510116898	HEBP1	0.740895538	0.758818151	TGFBR3L	1.695241919	1.719841793
			MTHFSD	1.362402288	1.220698919	ZKSCAN8	0.79673463	0.686325862	FIS1	1.362673357	1.205601692	HELLS	0.60950546	0.627895619	THBS1	1.556043633	2.183607109
			MTMR1	1.222546555	1.241489855	ZMAT2	0.751259456	0.773592463	FKBP8	1.280249571	1.208500336	HELQ	0.72910893	0.813037249	TIAF1	1.910571081	3.287469287
			MTOR	1.40104052	1.319817501	ZMYM2	0.749396766	0.82853149	FKRP	1.364047324	1.497494849	HERC1	0.730312226	0.737525143	TICAM2	2.019795554	4.279317697
			MTRNR2L2	1.229665772	1.99301784	ZNF134	0.63176082	0.760879751	FLT3LG	1.321077788	1.542469163	HERC4	0.724402216	0.812779751	TINAGL1	1.505638761	1.405961735
			MTUS1	1.57079971	1.215416937	ZNF155	0.651610674	0.215332533	FLYWCH2	1.584982277	1.566099091	HERPUD1	0.607508383	0.630457176	TJP3	2.22211967	2.339632183
			MVP	1.501348279	1.992413527	ZNF160	0	0	FMNL1	1.573407301	1.808428911	HEXIM1	0.679514759	0.467955099	TKT	1.238810656	1.549182349
			MYL9	1.655706539	1.632117687	ZNF215	0.677643133	0.783521423	FMNL3	1.223454013	1.632505696	HEXIM2	0.811101031	0.643080837	TM2D3	1.285021387	1.349752801
			MYLK	1.296899571	1.575401448	ZNF221	0.732399141	0.543129613	FN3K	1.222286812	1.291426	HFE	0.774759004	0.73249219	TM7SF3	1.213085229	1.281657553
			MYO18A	1.21374248	1.650238393	ZNF222	0.611183549	0.532182478	FNBP1	1.310771825	1.211398827	HHLA3	0.802348438	0.798395942	TM9SF2	1.290405503	1.266263494
			MYO1B	1.265285965	1.310278364	ZNF266	0.44827051	0.447458972	FNDC3A	1.261909621	1.226305863	HID1	0.642445892	0.811609251	TMBIM1	1.339375825	1.22370985
			MYO1C	1.275087477	1.413593974	ZNF277	0.635544566	0.812740865	FNDC3B	1.408228311	1.329319958	HIGD1A	0.608208217	0.723551668	TMC7	1.219097419	1.576107077
			MYORG	1.233241622	1.662071133	ZNF350	0.499151066	0.421713492	FOXA3	1.376253701	1.42032039	HINT1	0.711567328	0.762637678	TMC8	7.217484009	9.233802817
			MYPOP	1.709905865	1.332324565	ZNF41	0	0	FOXD2	1.635968426	1.786719313	HINT2	0.650762385	0.707067544	TMCC3	1.20668408	3.342063036
			NAA10	1.479386483	1.529261312	ZNF462	0.76572202	0.576881682	FOXF1	1.203494882	1.577064915	HIP1R	0.713627529	0.656096367	TMCO3	1.292759166	1.482846823
			NAA30	1.520588635	1.299365171	ZNF480	0.632409857	0.6589672	FOXJ2	1.234110484	1.434058012	HJURP	0.668941415	0.785147142	TMED8	1.339012176	1.885339174
			NABP2	1.73553861	1.425558181	ZNF490	0.74184383	0.687462494	FOXK2	1.381636307	1.453936434	HK2	0.796369691	0.561243685	TMEM115	1.305371423	1.645960249
			NACC1	1.306879651	1.338991238	ZNF493	0.645799982	0.51775518	FOXO6	1.411908878	2.401030101	HLA-DPB1	0.778646369	0	TMEM127	1.44048168	1.78655354
			NAGK	1.218850389	1.22504973	ZNF502	0.351342034	0.392273923	FPGS	1.252289438	1.467097922	HLTF	0.814482984	0.744244518	TMEM141	1.237802453	1.827165341
			NAGLU	1.633447354	1.967513368	ZNF516	0.71433061	0.469574055	FRMD8	1.844570303	1.798236117	HMBOX1	0.731383625	0.742911722	TMEM150A	1.543340107	1.869274826
			NAPEPLD	1.358560919	1.207998968	ZNF550	0	0.069454936	FSD1L	1.475845426	1.283090179	HMG20A	0.629292992	0.540202618	TMEM151A	1.403970356	2.292622561
			NARF	1.252672188	1.369824426	ZNF559	0.739429634	0.804683537	FSIP1	1.353810299	1.213345618	HMG20B	0.653382007	0.659682036	TMEM181	1.476598174	1.464880268
			NAT9	1.232175095	1.21365859	ZNF559-ZNF177	0.737732261	0.809052977	FSTL3	1.371128266	1.947495056	HMGA2	0.707206605	0.489526364	TMEM182	1.615409817	1.824535653
			NATD1	1.966791644	1.840418238	ZNF567	0	0	FUBP3	1.312280771	1.241110431	HMGB1	0.69202562	0.676384209	TMEM184A	1.354429794	1.619101969
			NAV1	1.205275613	1.583926667	ZNF587B	0.142283737	0.456254122	FUOM	1.317676318	1.790953115	HMGB2	0.619653706	0.604738754	TMEM199	1.270978155	1.544306427
			NBDY	1.58607238	1.210305689	ZNF595	0.432088256	0.367423507	FUT4	1.216542365	1.219420616	HMGB3	0.493049864	0.435231683	TMEM38A	1.3723124	1.58275136
			NBL1	1.648655082	2.550069958	ZNF597	0.711444554	0.677103882	FXN	1.300509802	1.459730465	HMGN1	0.832975883	0.799663466	TMEM44	1.308733312	1.372573239
			NCAM1	8.103778441	10.78312459	ZNF608	0.767106187	0.827589176	FZD5	1.595229977	1.509577032	HMGN5	0.786857851	0.761069148	TMEM51	1.420974378	1.900624779
			NCBP3	1.363262498	1.292396619	ZNF711	0.594238954	0.569272682	G6PC3	1.331215987	1.304048533	HNRNPA0	0.766980468	0.669099544	TMEM59L	1.947039943	2.715351258
			NCKIPSD	1.221822614	1.266097301	ZNF738	0.686089497	0.809070353	GAA	1.597055826	1.575463942	HNRNPA1L2	0.797657194	0.800147509	TMEM70	1.219599679	1.415553345
			NCLN	1.210539225	1.32605829	ZNF772	0.568115203	0.400170961	GABRD	1.446949882	2.079443829	HNRNPA2B1	0.759992096	0.740337448	TMOD1	1.622227778	3.379262205
			NCOA1	1.304813387	1.216362121	ZNF773	0.366381614	0.303035559	GADD45GIP1	1.30412832	1.248164241	HNRNPA3	0.611825699	0.595476238	TMTC2	1.255151354	1.885612139
			NDUFC2	1.585513018	1.255730295	ZNF776	0.619190998	0.623846104	GAL	1.38448342	1.708998867	HNRNPCL1	0	0	TMTC3	1.209244561	1.342300099
			NDUFC2-KCTD14	1.585513018	1.255730295	ZNF780B	0.712371478	0.537419024	GALE	1.653247414	1.721832363	HNRNPDL	0.81074394	0.796400854	TNFAIP3	1.2513296	1.702400716
			NDUFS1	1.462794091	1.476664144	ZNF791	0.723500978	0.678731718	GALK1	1.289107578	1.853672633	HNRNPF	0.732577394	0.787149088	TNK2	1.585100287	3.30207305
			NDUFS7	1.263824963	1.491765786	ZNF804A	0.354750674	0.280300931	GALNS	1.471897299	1.464205413	HNRNPH1	0.732623944	0.648595705	TNNT1	1.707056161	3.43402435
			NECTIN4	1657.1	1667.3	ZNF84	0.609083048	0.558221577	GALNT12	1.224690525	1.391554851	HNRNPH2	0.635639386	0.712815817	TNS4	1.306344616	1.646591016
			NEDD1	1.566054238	1.251674549	ZNF92	0.781485835	0.723400255	GALNT18	1.273487417	1.634798631	HNRNPH3	0.734404813	0.831049305	TOX2	1.524256574	1.693287801
			NEK5	1.244433069	1.775530015	ZSCAN16	0.723379824	0.548546342	GALNT4	1.257749472	1.225185992	HNRNPK	0.615105021	0.464750401	TPGS2	1.201731367	1.67641157
			NEK6	1.571257679	1.504009994	ZSCAN2	0.767971626	0.752737216	GAMT	1.74415883	2.069732198	HNRNPL	0.783462965	0.545151684	TPST2	1.33858945	1.444631373
			NENF	1.384746246	1.225124774	ZSCAN29	0.622944551	0.378837814	GAS2L1	1.319141478	1.421660293	HNRNPR	0.764141971	0.638400037	TRAF6	1.336802623	1.58632779
			NEPRO	1.460168017	1.364728808	ZSCAN30	0.659564722	0.679250834	GAS7	1.467527046	1.342611191	HNRNPU	0.566196141	0.508554606	TRAK2	1.261552186	1.552183606
			NES	1.459733569	1.730913041	ZSWIM6	0.689161283	0.700772934	GATA2	2.049705928	1.67911273	HNRNPUL1	0.706971776	0.601386498	TRAPPC2L	1.418380338	1.748390913
			NF2	1.436107626	1.22652739	ZSWIM7	0.787241489	0.746524217	GATD1	1.372346878	1.705222544	HNRNPUL2	0.781043927	0.817878069	TRAPPC8	1.319093273	1.701663489
			NFE2L3	1.220984772	1.366773204				GCC1	1.725356776	1.640246086	HOOK1	0.72340012	0.810346213	TRIM14	1.370993982	1.547636384
			NFIX	1.211672149	1.442873719				GDPD5	1.364087055	1.28299137	HOXA7	0.756389476	0.753889799	TRIM3	1.323788034	1.738376705
			NHLRC3	1.241036584	1.208758727				GEMIN7	1.951002227	1.506847507	HOXA9	0.612400632	0.589421996	TRIM32	1.420530585	1.707483284
			NHS	1.339584058	1.289570957				GET4	1.364226102	1.439387816	HOXB6	0.759701978	0.606662051	TRMT1	1.284203377	1.321854455
			NINL	1.369931114	1.327472264				GFOD2	1.341754487	1.230470137	HOXC10	0.77975482	0.228789152	TSC2	1.314343125	1.970388786
			NIPSNAP3A	1.517150433	1.551890059				GFPT1	1.385498425	1.596688363	HOXC6	0.59046826	0.782707295	TSC22D1	1.407188883	1.814699413
			NKIRAS2	1.729473583	1.27625094				GFPT2	1.248859557	1.760971749	HOXC9	0.705681149	0.752140719	TSEN54	1.400278229	2.519939038
			NKX3-1	1.252087365	1.641889853				GJB5	1.468759751	1.381875682	HR	0.644770931	0.543004209	TSPAN18	1.906547619	1.687796411
			NLE1	1.477561933	1.346771487				GJC1	1.291217813	1.454544978	HS3ST1	0.644688699	0.453926635	TSPAN4	1.504369087	2.030458775
			NLRP1	1.498898105	1.473288611				GLE1	1.437067822	1.405706839	HSD17B12	0.671941094	0.650768056	TSPO	1.34576202	1.431877388
			NMB	1.206454403	1.397445598				GLI2	1.531485377	2.252045753	HSD3B7	0.384713251	0.540628145	TSR3	2.024009847	3.677073335
			NME1	1.414389902	1.404241225				GLI4	1.491942172	1.845043455	HSF2	0.735901192	0.796229047	TTC21A	1.504966096	2.020695656
			NME4	1.494105888	1.525592619				GLRX3	1.738666337	1.390122323	HSPA13	0.58153155	0.687014044	TTC30A	1.242525208	1.325974788
			NOD1	1.280370503	1.213832997				GLT8D1	102.8	1.665577342	HSPA4	0.759277046	0.763085081	TTC8	1.200051196	1.4724333
			NOL4L	1.629392971	1.881817727				GLTP	1.259203559	1.328966823	HSPA4L	0.72182032	0.825528378	TTC9	1.596634418	1.941330682
			NOL7	1.500517294	1.204445464				GMDS	1.215427794	1.347923781	HSPA9	0.821006903	0.649568682	TTLL3	1.964969924	2.102408564
			NOL9	1.573341231	1.286955754				GMEB1	1.212745528	1.586359469	HSPD1	0.829243934	0.775342733	TUBD1	1.237139288	1.414228723
			NOS3	155.3	3.026143791				GMEB2	1.498934578	1.791913247	HSPE1	0.752928569	0.722233568	TWSG1	1.214267662	1.516114229
			NOTUM	1.716587636	2.101542894				GMPPA	1.352068962	1.380521605	HSPE1-MOB4	0.752928569	0.722233568	TXNDC9	1.20695157	1.327104849
			NPDC1	1.265482415	1.470472703				GMPR	1.484666991	1.309617548	HTD2	0.733544142	0.72935364	UBE2F	131	240.8
			NPRL2	1.497050213	1.253539856				GNA11	1.285081997	1.42223903	HYI	0.605053658	0.737711115	UBE3D	1.213109767	1.290955508
			NPW	1.567695474	1.793567616				GNAI1	1.505969575	1.480037618	HYPK	0.60942625	0.628710047	UCKL1	1.290290606	2.060694406
			NR2F6	1.480196246	1.446849625				GNAL	1.580082802	2.959906014	IBA57	0.677536225	0.684988883	UNC13D	1.679343102	2.26907274
			NRTN	1.652841172	1.843441666				GNAZ	1.458337853	2.199940938	ICAM1	0.068217665	0.071648278	UNKL	1.398610326	1.396060687
			NSD1	1.289005797	1.308103157				GNB1	1.50249576	1.629001171	ICE2	0.750227131	0.817309841	UPK3B	3.271041369	2.036013188
			NSD2	1.330836302	1.314023289				GNPTG	1.915518512	2.24457999	ID2	0.601250705	0.691298782	URI1	1.366177964	1.670306967
			NSMF	1.311345106	1.434020178				GOLGA1	1.399389434	1.219839748	IDH1	0.792172784	0.614434346	USP40	1.215984457	1.630155507
			NT5DC2	1.363727803	1.425363759				GOLGA2	1.848169607	1.475677554	IER5	0.772277644	0.670622183	USP6	5.029229407	2.640716374
			NTHL1	1.513055971	1.542131711				GOLGA3	1.486461463	1.456951228	IER5L	0.752424265	0.730176531	UXS1	1.293341767	1.628250155
			NTMT1	2.750886455	1.755669571				GOLGA5	1.491308466	1.376900492	IFI35	0.574692229	0.61639308	VEZF1	1.673579334	1.923866192
			NTPCR	1.314152112	1.224023428				GOLPH3	1.50100153	1.351302814	IFI6	0.578262452	0.514918278	VGF	1.434321961	1.607274494
			NUAK1	1.49824303	1.391251818				GORASP1	1.461472907	1.288420239	IFT122	0.802946979	0.778536487	VGLL4	1.278413785	1.435255287
			NUBP2	1.324376069	1.492793882				GOSR2	1.530884058	1.218524944	IFT140	0.597505796	0.647388254	VIRMA	1.269169153	1.519134659
			NUCB1	1.411035065	1.597495843				GPAT2	1.796908707	2.072966353	IFT27	0.679912861	0.784336434	VPS11	1.333338496	1.471124487
			NUDT14	1.499780406	1.559678756				GPATCH11	1.234627641	1.214969213	IFT46	0.819889078	0.829372428	VPS13C	1.636871256	1.488506956
			NUDT22	1.20978819	1.575368832				GPC1	1.804613502	2.176816766	IFT80	0.542539813	0.545995478	VPS41	2.005192108	1.54981355
			NUP210	1.296027788	1.297883761				GPCPD1	1.291072829	1.287708055	IGF2BP2	0.717863604	0.814915767	VPS53	1.748185463	1.657866165
			NXN	1.31943665	1.543790004				GPD2	1.267098028	1.453065804	IGF2BP3	0.6386717	0.514814714	VRK3	1.228909994	1.612445149
			NXPH4	1.403623861	1.398450066				GPI	1.302638424	1.421036104	IK	0.720826797	0.770914482	VSIR	1.225448511	2.134814556
			OAF	1.205498972	1.257942754				GPR137	1.327881385	1.21585011	IKBIP	0.541432931	0.734909839	WASHC3	1.410136108	1.250727727
			ODF3B	1.63425308	1.667753612				GPR157	1.232676497	1.564322976	IL17RC	0.667203271	0.653559878	WBP1L	349.4	1.537493158
			OGFR	1.783734133	1.666500449				GPR158	1.335280008	1.254012779	IL4I1	0.647291059	0.530186937	WDR3	1.213517172	1.296074967
			ONECUT3	1.259855893	1.402139845				GPR173	1.22176794	1.574435805	ILF3	0.615656981	0.484404583	WDR7	1.35464134	1.411580225
			ORAI2	1.519213069	1.425696012				GPR180	1.726904053	1.378285938	ILVBL	0.607212029	0.626885966	WIPF3	1.579115778	2.479183957
			ORAI3	1.390595658	1.694543519				GPRIN1	1.354474097	1.314398265	IMMT	0.797483343	0.753852005	WIPI1	1.395200531	1.686244874
			OSBPL7	1.26523137	1.405749843				GPS1	1.566694161	1.605062634	IMPA2	0.80713415	0.7799187	WNK2	1.252784198	2.590338467
			OST4	1.433669166	1.219751553				GPSM1	1.372288423	1.512878592	INAFM1	0.746458826	0.776041945	WNT7B	1.396061008	2.545947417
			OTUB2	1.550514522	1.755627076				GPX4	1.50318088	1.451425877	ING1	0.57988704	0.486414519	WWC3	1.207492178	1.543057015
			OTUD1	1.356713762	1.346458475				GRAMD1C	1.790624573	1.497946762	ING3	0.727815457	0.664762199	XRRA1	1.214572618	1.466105614
			P2RX4	1.344467006	1.212517517				GRAMD4	1.473830885	1.716287826	ING4	0.551648912	0.553221979	YKT6	1.2469192	1.384531237
			PACS1	1.491627796	1.493333909				GRHPR	1.457055153	1.595862527	INO80B	0.657676742	0.674757529	YPEL5	1.568776063	1.911031162
			PACS2	1.362214358	1.686233141				GRID1	1.338029962	2.004710733	INPP5J	0.825820051	0.697616264	ZBED6	4.36713139	2.190676521
			PACSIN2	4.082308926	2.590076895				GRINA	1.370074357	1.671448343	INTS2	0.701307758	0.713149688	ZBTB40	1.29629054	1.737431298
			PACSIN3	1.37807588	1.631993889				GRK2	1.399536906	1.486376562	INTS4	0.718546233	0.822538679	ZBTB42	1.551687487	2.274249147
			PAK1	1.201825939	1.397377423				GRK5	1.532634055	1.833195427	INTS9	0.73902708	0.736278725	ZBTB47	1.210308917	1.338773639
			PAK6	1.256903883	1.41175957				GRK6	1.437392404	1.217970485	INTU	0.68129338	0.826496228	ZDHHC1	1.343973543	1.2673924
			PALM3	12.34363082	23.39215686				GRSF1	1.31449592	1.493765166	IP6K2	0.594644705	0.533859849	ZDHHC14	1.339641466	2.058174388
			PAM	1.337296634	1.401277147				GRTP1	1.984922379	1.730004144	IPO11	0.518705463	0.66041461	ZDHHC8	1.278610541	2.582395121
			PAPSS1	1.281740994	1.39280466				GSDME	1.790457002	1.452983974	IQCG	0.656202962	0.555681242	ZFYVE19	1.30034848	1.469751146
			PAPSS2	1.410879906	1.525384285				GSE1	1.500872739	1.718836785	IREB2	0.716438908	0.625748402	ZGPAT	1.236358609	1.527867195
			PAQR7	1.378618448	1.416661594				GSK3A	1.530060314	1.314020153	IRF2BP2	0.674251857	0.634930915	ZHX3	1.604332594	1.62707016
			PARD3	1.514240506	1.23315491				GSPT1	1.420505625	1.220247537	IRF5	0.675229422	0.828698528	ZMAT3	436.7	280.9
			PARD6A	1.748440321	1.645516518				GSR	1.376633002	1.449914704	IRX5	0.375791944	0.628944342	ZNF160	131	120.4
			PARP12	1.208639095	1.376196684				GSTK1	1.311475956	1.361782058	ISL2	0.5901244	0.415175943	ZNF174	1.328883882	1.418649572
			PARP16	1.311869688	1.414865986				GSTT2B	1.303239478	1.268737606	ISOC2	0.604040302	0.789916629	ZNF232	1.429378951	1.790056998
			PARP6	1.370784826	1.319626062				GTF2A1	1.222464437	1.248483308	ITCH	0.781658348	0.671464472	ZNF275	1.280973605	1.512110309
			PARP9	1.230573239	1.204556975				GTF2E2	1.324373313	1.292258424	ITGA1	0.733653897	0.744742716	ZNF283	1.326224604	1.465383358
			PATL1	1.25816094	1.28190229				GUSB	1.489490556	1.266594631	ITGA3	0.654996889	0.738742911	ZNF316	1.292440819	1.80544201
			PATZ1	1.452399753	1.324579547				GYG1	1.245202252	1.278681467	ITGA6	0.667155608	0.721402411	ZNF354B	1.354231975	1.251209487
			PBX1	2.33005507	2.26491764				GYS1	1.27163051	1.429333474	ITPRIPL2	0.755642471	0.810138975	ZNF365	1.402267749	1.460608856
			PBX3	1.487327063	1.313026552				GZF1	1.439561148	1.323559796	IVNS1ABP	0.798016985	0.768353183	ZNF395	1.342068843	1.652262011
			PCLO	1.474661522	1.302375089				HABP4	2.076773738	1.843912353	JADE1	0.686208917	0.720745551	ZNF445	1.261911523	1.758281103
			PCSK7	1.614273799	1.41216474				HACD1	1.369544817	1.342333018	JAG1	0.736317677	0.79094027	ZNF449	1.28506961	1.433695257
			PCYOX1L	1.481259118	1.525291937				HAGHL	1.261578972	2.103177266	JMJD1C	0.692750521	0.782532663	ZNF473	1.20557776	1.502644516
			PDE5A	1.239678529	1.397630411				HAUS2	1.339628236	1.314151087	JMY	0.713066153	0.741543811	ZNF500	1.293822857	1.333676933
			PDGFA	1.410993021	2.045496062				HCFC2	1.888720978	1.3588935	JPT2	0.782051809	0.69146943	ZNF555	1.239572704	1.862347252
			PDGFB	1.415808852	1.270864244				HDAC10	1.422427951	2.176256321	JRKL	0.822234578	0.773178293	ZNF576	1.517594295	1.459300723
			PDHA1	1.356188004	1.255574695				HDAC11	1.310740861	1.344163817	JUNB	0.810370334	0.779210087	ZNF587B	14.48871972	9.309298747
			PDIA5	1.498636525	1.573885052				HDAC3	1.222741202	1.685187206	JUP	0.631831328	0.784124497	ZNF613	1.285506155	1.458845937
			PDK3	1.298994086	1.534574032				HDGFL2	1.214348981	152.9	KANSL2	0.724235399	0.659181559	ZNF641	1.440584072	1.285369434
			PELI2	1.807444146	1.548391511				HDHD3	1.410447308	1.715526285	KAT7	0.77100275	0.573006018	ZNF668	1.591980559	1.931610942
			PELI3	1.545971525	1.99590403				HEATR3	1.266644459	1.30869104	KATNB1	0.749039052	0.764196917	ZNF75D	1.24531316	1.319256925
			PEX10	1.215292603	1.303785897				HEATR5B	1.256772829	1.224066678	KBTBD2	0.704189739	0.69127416	ZNF778	1.720170183	2.1507851
			PEX11A	1.232928323	1.223205403				HECTD3	1.686476313	1.652436988	KBTBD3	0.655659775	0.706116754	ZNF814	25.84328358	28.78106185
			PEX11G	1.652066116	1.293841556				HECTD4	1.514359344	1.268442635	KCNG1	0.804752275	0.822153241	ZNF860	1.376675991	1.703728542
			PFDN4	1.247921429	1.272465729				HECW2	1.289157485	1.400167636	KCNH3	0.637434926	0.666978534	ZNF888	1.236608088	1.838917284
			PFKFB3	1.355752634	1.345113646				HEMK1	1.949325047	1.505526587	KCNN4	0.744539876	0.823882074	ZSCAN20	1.301033566	1.474403336
			PFKL	1.319018171	1.387961069				HES2	1.979616636	2.768159637	KCTD14	0.463404558	0.445681041	ZSCAN22	1.220164783	1.471062881
			PGGHG	1.614433475	1.708855552				HES6	1.259460597	1.405904739	KCTD20	0.732213401	0.748890887	ZSCAN32	1.321415414	1.423486699
			PGP	1.261985821	1.226101587				HEYL	1.3608208	1.31947541	KCTD5	0.743432617	0.731860904	ZSWIM8	1.516020565	1.803925741
			PGS1	1.432894533	1.220337152				HGS	1.422030989	1.547881888	KCTD7	0.460565341	0.665229522
			PHF1	1.35329506	1.204786559				HGSNAT	1.689235367	1.813578879	KDM1A	0.718871764	0.729369681
			PHF2	1.249089678	1.308598033				HIC2	1.330746588	1.702168675	KDM2B	0.53809857	0.536108832
			PHF20L1	1.32084312	1.420194184				HINT1	1.328197763	1.328300906	KDM3A	0.793532238	0.560251896
			PHLDA3	1.231003794	1.444269796				HIP1	1.86088518	1.613884603	KDM4A	0.749470171	0.59471486
			PHYH	1.385289297	1.36483029				HIPK3	1.220285252	1.230327584	KDM6A	0.700165298	0.604697885
			PIGA	1.252163194	1.435381113				HLA-DMA	1.210699288	1.621649485	KEAP1	0.719714202	0.709830231
			PIGQ	1.351871005	1.209386203				HLA-DPB1	1.269903312	1.277412281	KHDC1L	0.206169342	0
			PIGV	1.486258853	1.30799394				HM13	1.373819431	1.304284019	KHDC4	0.686247803	0.605894778
			PIK3AP1	1.240396395	1.462651841				HMGA1	1.516191247	1.589062673	KHNYN	0.658315842	0.579460143
			PIK3CD	1.294713814	2.614631768				HMGA2	1.283635073	1.272596721	KHSRP	0.752407024	0.699016294
			PIP5K1C	1.913585267	1.304405929				HNRNPA0	1.247751039	1.205175061	KIAA0513	0	0.659003831
			PITPNM1	1.231256614	1.884813833				HNRNPAB	1.337581971	1.431565097	KIAA1143	0.619119575	0.694895871
			PITPNM2	77.6	101				HNRNPLL	1.234516019	1.210406423	KIAA2013	0.522429334	0.417126215
			PITPNM3	1.56901656	1.709542536				HOMEZ	1.206356829	1.318658163	KIF11	0.535279409	0.487872633
			PITX1	1.231623708	1.314534186				HOOK3	1.426534921	1.252334598	KIF15	0.621399529	0.69713157
			PKD1L2	1.321218317	1.202817094				HOXA13	1.357706995	1.671197704	KIF18A	0.69816279	0.701145705
			PKIG	1.658750246	1.209722281				HOXB4	2.602348118	4.297310582	KIF20B	0.690093201	0.762830985
			PKMYT1	1.463564019	1.290309086				HOXB6	1.264119221	1.336413138	KIF22	0.698988829	0.816678453
			PKN1	1.268488514	1.206669794				HOXB8	3.73574082	4.472968207	KIF23	0.692677162	0.628530703
			PLA2G4B	77.6	126.3				HPCAL1	1.534281255	1.497906501	KIF24	0.586051778	0.746330207
			PLAGL1	77.6	581				HPS6	1.322642045	1.391629519	KIF27	0.758197114	0.775359884
			PLAGL2	1.215441918	1.237009699				HR	1.329078187	1.220076042	KIF2C	0.630693844	0.635366218
			PLAU	2.062289723	2.000429455				HRAS	1.361369179	1.574149284	KIF4B	0.71481961	0.652121769
			PLCB2	3.066475645	1.353296703				HS1BP3	1.434948873	1.201035461	KIF5A	0.617855637	0.565227554
			PLCB3	1.284300993	1.492428522				HS3ST1	1.48595736	1.284809063	KIF5B	0.709029069	0.797875205
			PLCD1	1.306275588	1.239395956				HS6ST2	377.2	218.4	KIFC1	0.715002222	0.787554428
			PLCD3	1.264016538	1.359272052				HSD11B2	1.255158926	1.39509192	KLF4	0.502524267	0.565245695
			PLD2	1.484884073	1.541957714				HSDL1	1.602851154	1.57769351	KLF5	0.508447	0.735253992
			PLEKHA1	1.399125526	1.462357196				HSF2BP	1.312272693	1.35296047	KLF6	0.624289913	0.545920503
			PLEKHA4	1.203762431	1.243995578				HSP90B1	1.20685265	1.223953218	KLHDC2	0.792493728	0.832293439
			PLEKHA7	1.465291758	1.990537421				HSPA8	1.257664431	1.38569571	KLHL28	0.62140277	0.643610455
			PLEKHG2	1.334530605	1.424721353				HSPG2	1.546537452	1.925661964	KLLN	0.785746791	0.82647
			PLPP2	1.482000779	1.481481481				HTATIP2	1.432691293	1.22910897	KLRC2	0.612045299	0.179936461
			PLPP5	1.204910895	1.522168201				HTR1D	1.563126883	1.413231417	KLRC3	0.717610157	0.433369323
			PLPP6	1.430109814	1.441054385				HTRA2	1.262746343	1.437325665	KMT2E	0.82121253	0.702284498
			PLPPR2	1.282743357	1.310396175				HTT	1.578711764	1.471124681	KMT5C	0.800196996	0.694016127
			PLXNA3	1.307638986	1.319364066				HUS1	1.787376375	1.901717255	KNSTRN	0.56593224	0.584189252
			PLXND1	1.225567999	2.378913481				HUWE1	1.404351888	1.233815874	KNTC1	0.752570365	0.640294634
			PM20D2	1.353003171	1.24276977				HYAL2	1.361137981	1.502592973	KPNA3	0.743035527	0.780053432
			PMPCA	1.287488186	1.318593057				HYAL3	1.246562471	1.369424365	KPNA6	0.741453607	0.797821477
			PNPLA2	1.374181641	1.206821287				IAH1	1.359924361	1.330879841	KRBOX4	0.6270029	0.624251949
			PNPLA6	1.287695048	2.531117397				IARS2	1.572147601	1.275628437	KRT13	0	0
			POF1B	1216.9	2.491985203				ICE1	1.308861645	1.420289092	KRT18	0.691657552	0.557732464
			POFUT1	1.207980165	1.239507682				ICMT	1.377151575	1.672568819	KRT222	0.702873148	0.595352692
			POFUT2	1.404246655	1.28038872				ICOSLG	1.286763011	1.732533176	KRT5	0	0
			POLDIP2	1.388176718	1.309146019				ID3	1.421514122	1.695087584	KRT6A	0	0
			POLR2C	1.466325618	1.308849399				IDH2	1.274355399	1.682996941	KXD1	0.699246045	0.783812695
			POLR2I	1.534648919	1.379486582				IDS	1.321773872	1.328933841	KYAT3	0.738763538	0.680261201
			POMGNT1	2.727303127	1.478085106				IDUA	1.23565624	1.522575968	L1CAM	0	0
			POMGNT2	1.304998156	1.656304853				IER2	1.218991061	1.348192216	L3MBTL3	0.544585538	0.568315925
			POMT1	1.225274562	1.395444763				IFIT3	1.357692834	1.373693686	LAP3	0.697240716	0.827226223
			PPARA	1.54952919	2.843521573				IFITM1	2.048638585	1.710576923	LARP4	0.655633718	0.714121708
			PPDPF	1.36000902	1.36406334				IFNGR2	1.574014068	1.515911899	LARP7	0.716819168	0.715687833
			PPFIA3	1.320149729	1.413984103				IFNLR1	1.215887278	1.370617295	LAT2	0.314371018	0.478309595
			PPIL2	1.313611699	1.238284693				IFT20	1.860490716	1.322486088	LBHD1	0.669355622	0.655270875
			PPM1F	1.412230206	1.674889742				IGF1R	1.387284081	1.719100341	LDHB	0.710906227	0.536846711
			PPM1H	1.320077104	1.514989896				IGF2R	1.287272412	1.409376943	LEO1	0.77421915	0.81106408
			PPP1R35	1.343558282	1.46222519				IGFBP6	1.813433057	2.177452185	LFNG	0	0
			PPP1R3E	1.518277476	1.543846873				IGHMBP2	1.506241244	1.247910253	LGALS3BP	0.726115078	0.647155557
			PPP2R1A	77.6	1.745640013				IKBKG	1.229822941	1.499690546	LGALS7B	0	0
			PPP2R5C	1.865662363	1.544567907				IL13RA1	1.242518828	1.394086773	LGALS8	0.538983748	0.733552632
			PPP5D1	1.287558743	1.248562144				IL17RB	1.634946928	2.533437677	LIAS	0.682212263	0.586936641
			PPP6R2	1.369783005	1.458201751				IL17RD	1.536732807	1.629411153	LIG3	0.704437609	0.73373024
			PRDM5	1.257995158	1.226287558				IL18R1	1.492510583	1.587882208	LIMA1	0.728192853	0.722556696
			PRELID3B	1.349597443	1.331114634				IL4R	1.582543103	1.26251431	LIX1L	0.400063676	0.595309542
			PRF1	2.766277129	1.663843801				ILKAP	1.85125329	1.914857086	LMBRD1	0.639245669	0.470147355
			PRICKLE4	1.206329662	1.558302037				IMPDH1	1.438753091	1.884976553	LMNB1	0.686158261	0.715969081
			PRKAG2	1.252280276	1.256541583				INAFM2	1.268583079	1.398026288	LMO4	0.741287376	0.545662246
			PRKAR2B	1.281342131	1.555076984				INF2	2.056369206	2.472487713	LMO7	0	0.514280483
			PRKCD	1.383619435	1.534823793				ING2	1.219630766	1.75299333	LMTK3	0	0
			PRKCI	1.305615935	1.386420715				INPP4A	1.373890581	1.249453644	LNX1	0.456911399	0.480327696
			PRKCQ	1.629827526	1.786859421				INPP4B	2.566274719	2.577229081	LONRF3	0.659825328	0.817360289
			PRKCZ	1.395429235	1.471725691				INPP5A	1.286487294	1.340054651	LRIF1	0.811859606	0.724321796
			PRMT2	1.256917869	1.300178025				INPP5E	1.621228211	1.7068439	LRRC23	0.792289338	0.643965495
			PROM1	1.213507967	1.209182756				INPP5F	1.603658155	1.820398603	LRRC37A3	0.68370131	0.662269567
			PROM2	2.145759053	2.053973557				INSIG1	1.496211315	1.928477923	LRRC61	0.738137602	0.672587131
			PROSER1	1.200394369	1.240348607				INSR	1.272094195	1.661082839	LRRC8B	0.760787714	0.814358673
			PRPF8	1.369554041	1.233765814				INTS1	1.207016508	1.262835266	LRTOMT	0.761963765	0.806841803
			PRR5-ARHGAP8	1.208722878	1.632872903				INTS11	1.646528005	1.437662313	LSM10	0.765074578	0.817242184
			PRRX2	1.676682021	1.516501221				INTS5	1.426498964	1.488428367	LSM3	0.650887427	0.829119522
			PRSS22	1.60672292	1.542143494				IPPK	1.419242863	1.490124149	LSM8	0.618912827	0.649219137
			PSEN2	1.481519196	1.342455395				IQCE	1.800183359	1.787774178	LSR	0.764306518	0.831890358
			PSMC3IP	1.752343963	1.578232656				IQGAP3	1.235897823	1.261872456	LTN1	0.738832948	0.622198651
			PSMD13	1.344653867	1.440654543				IQSEC2	2.160532034	1.329203929	LUC7L2	0.762069666	0.643239048
			PSME1	1.709997383	1.50463431				IRAK1	1.342393028	1.383997768	LYPD1	0	0
			PSMG3	1.313332054	1.608410236				IRF2BPL	1.407944813	1.313107552	LYPLAL1	0.804391544	0.745599819
			PSMG4	1.263041574	1.210355853				ISG20L2	1.240826668	1.234979773	LYRM4	0.727922269	0.723108006
			PTBP2	1.417543607	1.219926402				ISYNA1	1.541577529	1.507229402	LYRM7	0.751831021	0.750674985
			PTCH1	1.825490518	2.904353562				ITGA7	1.960703578	1.276717885	LYSMD4	0.624611667	0.539865645
			PTDSS2	1.440386911	1.255144086				ITGB4	1.913449076	1.887154935	LZTFL1	0.77594188	0.63712245
			PTGFRN	1.315886222	1.57444402				ITGB5	1.283855378	1.236472602	MAD2L1	0.720708886	0.732976206
			PTK2	1.627332688	1.207760485				ITGBL1	3.008390542	5.473856209	MAD2L1BP	0.700580862	0.603469187
			PTK6	1.442511406	1.611405891				ITM2C	1.217918467	1.2887943	MAGEA12	0.671327631	0.70784449
			PTMS	1.553861558	1.398599024				ITPA	1.237534068	1.276618675	MAGEA2	0.515800343	0.396828235
			PTOV1	1.461104595	1.224696459				ITPK1	1.236532226	1.528449635	MAGEA2B	0.408313626	0.376460746
			PTP4A3	1.291821388	1.219655114				ITPR1	1.307572915	1.366684201	MAGEA3	0.754794072	0.569707517
			PTPDC1	1.522145702	1.285261743				ITPR3	1.425353293	2.02125368	MAGED1	0	0
			PTPN18	1.405502287	1.274325136				ITPRIPL2	1.253919863	1.278232826	MAGED2	0.729043027	0.569134112
			PTPN2	1.368182746	1.232183638				ITSN1	1.388712342	1.330692696	MAGOHB	0.744711315	0.555275743
			PTPN6	336.6	75.7				JAG1	1.284390548	1.274872409	MAGT1	0.727617772	0.536960789
			PTPRH	3.085845064	2.307510149				JAG2	1.43116367	2.11243595	MANBAL	0.768806747	0.705875465
			PTPRU	1.638643589	1.66729521				JAGN1	1.236253314	1.23086719	MAOB	0.591398799	0.651482363
			PUDP	1.411991602	1.381184982				JAK1	1.206022951	1.208934601	MAP1B	0.593022269	0.526128471
			PWWP2B	1.428900557	1.300556054				JAK2	1.21347659	1.238676696	MAP1LC3B	0.646678392	0.488477779
			PXMP2	1.20568908	1.234381877				JAZF1	2.025128733	5.653258057	MAP2K2	0.657657164	0.816271608
			PXN	1.414344426	1.246717595				JCAD	2.374921028	2.01003662	MAP3K14	0.709483409	0.750206639
			PXYLP1	1.26451319	1.248645699				JKAMP	1.230110349	1.248070462	MAP3K15	0.775891724	0.388250356
			PYGO2	1.233554905	1.221747304				JMJD4	1.486976788	1.317359773	MAP3K2	0	0
			QTRT1	1.385424629	1.368052639				JOSD2	1.536663591	1.755475205	MAP7	0	0.565258216
			RAB11FIP3	1.477023433	1.321898931				JPH1	1.206521384	1.589925266	MAPK14	0.774643626	0.829438701
			RAB20	1.250736555	1.549986576				JRK	1.294369013	1.528648607	MAPK3	0.462324386	0.547445464
			RAB22A	1.234909285	1.242528901				JUND	1.449061542	1.691046464	MAPK8	0.755376791	0.643636851
			RAB26	1.33771527	1.667562783				KANK1	1.875971076	1.478256933	MARCKS	0.459976253	0.355187536
			RAB31	1.218505863	1.329077928				KANK2	1.277817669	1.403973348	MARK1	0.627487888	0.692975375
			RAB3A	1.714830334	2.879076963				KANK3	1.913525009	1.412880311	MAT2B	0.677204622	0.697294869
			RAB40B	1.422186675	1.521919796				KANSL3	1.30748124	1.307624917	MAVS	0.556305693	0.639681815
			RAB4A	1.510303439	1.522949907				KAT14	1.283730096	1.323157212	MAZ	0.719394536	0.755620767
			RAB5C	1.588123373	1.231319799				KAT2A	1.439749077	1.428868786	MBD3	0.640898359	0.577547599
			RAC3	1.413390152	2.017526836				KAT6A	1.588682688	1.386079135	MBD4	0.814387214	0.774955653
			RALGPS1	1.225398324	1.3494984				KAT6B	1.288788846	1.698563099	MBD5	0.821357675	0.806262776
			RASA3	1.314502366	1.522804364				KATNAL1	1.681702429	1.657228813	MBNL2	0.593571663	0.347301645
			RASA4	1.290219412	1.854361702				KAZALD1	1.610103729	1.88242386	MBTD1	0.718309896	0.676810406
			RASA4B	1.565247431	2.11971831				KBTBD11	1.579774401	1.557392946	MBTPS2	0.72536961	0.77510714
			RASD2	1.219167332	1.317499681				KCMF1	1.513063787	1.538301308	MCAM	0.403027237	0.554293156
			RASGEF1A	1.329786925	1.986252958				KCNC4	1.517339167	1.983713653	MCAT	0.620656848	0.750799692
			RASGRP2	2.404154863	1.261684885				KCNG1	1.785053898	1.512614847	MCCC2	0.742128957	0.789295903
			RASSF5	1.337730237	1.522233816				KCNG3	1.444771862	1.739322596	MCL1	0.737638661	0.760474881
			RAVER1	1.250576098	1.287289046				KCNH2	1.987794169	2.382327779	MCM2	0.781024123	0.674953252
			RBBP9	1.363964318	1.409138746				KCNJ12	1.470328053	1.543043796	MCM4	0.629642282	0.755651785
			RBFOX2	1.222094717	1.219198272				KCNN4	1.431333347	1.446313062	MCM5	0.759367612	0.652817959
			RBL2	1.446788208	1.273698829				KCNQ2	1.299322332	1.402790431	MCM6	0.638763503	0.545797615
			RBM33	1.2491939	1.233970468				KCTD11	1.274553637	1.240150663	MCM7	0.763154109	0.759514911
			RCOR2	1.279962395	1.499557788				KCTD12	1.359735884	1.558843515	MCU	0.783238476	0.734524279
			RECK	1.245282077	1.245412363				KCTD18	1.341810905	1.408741818	MDH1	0.622398515	0.664194927
			RELA	1.234618279	1.249442517				KCTD2	1.305654426	1.457845825	MDM2	0.764318391	0.646426502
			RELB	1.333835644	2.54507295				KCTD6	1.515464551	1.486909604	MDN1	0.544983662	0.482292289
			REPS2	1.312497163	1.881817727				KDELR2	1.949333562	1.916229135	MED17	0.724766065	0.737082808
			RETREG3	2.05671852	1.605822491				KDELR3	1.283831638	1.397765495	MED18	0.542161524	0.47334293
			REXO4	1.552506214	1.476244185				KDM2A	1.84783477	1.374512012	MED20	0.792852247	0.73827542
			RFNG	1.274035098	1.649089243				KDM4B	1.549546318	1.469475962	MED21	0.806300397	0.755752347
			RFX1	1.565758628	1.766008627				KHDRBS3	1.460608504	1.427000921	MED4	0.619510401	0.624062189
			RGPD4	1.545273632	75.7				KHK	1.61393417	2.452042018	MED6	0.785568097	0.751939487
			RGS12	77.6	202.1				KHSRP	1.234359989	1.267099778	MELK	0.690346814	0.71223372
			RGS19	1.574951783	1.686223717				KIAA0100	1.527977263	1.223149757	MEPCE	0.670742299	0.64616895
			RHBDF1	1.634236532	2.837988251				KIAA0895L	1.27472625	1.283873768	MET	0.59270443	0.620335016
			RHBDF2	1.258415094	1.407086109				KIAA1522	1.866355496	1.612847917	METTL15	0.692849879	0.706671127
			RHOBTB2	1.296532668	1.346423156				KIAA1671	1.347332319	1.330365446	METTL2B	0.830531624	0.828661454
			RHOC	1.578554326	1.328004126				KIAA1841	1.325756149	1.569815087	METTL3	0.799633849	0.691110087
			RHOF	1.355430409	1.236036753				KIF13A	1.260265691	1.206542882	MEX3C	0.754684021	0.618246552
			RIBC2	1.711955446	1.373410349				KIF1C	1.930923619	1.879322802	MFGE8	0.634803442	0.755922998
			RIC1	1.275497203	1.271715867				KIF21B	1.813830499	1.340394744	MFSD4A	0.292256214	0.491707501
			RILPL1	1.235748418	1.261034911				KIF26A	1.323870871	1.575508947	MGAT2	0.683504559	0.822661531
			RIMBP3C	1.28375286	378.9				KIF3B	1.460409829	1.218926193	MGME1	0.811517692	0.69713052
			RIMKLA	1.598615588	1.700051271				KIFAP3	2.314599217	2.018877389	MGST2	0.755141344	0.819814383
			RNASET2	1.416831747	1.590931793				KIFC1	1.348193747	1.392119337	MICU1	0.815140783	0.804106658
			RNF10	1.759055082	1.213495988				KIFC2	1.937024072	2.301773027	MID1IP1	0.626388958	0.536351849
			RNF11	1.436661568	1.296669148				KIFC3	1.203056642	1.806150915	MIF	0.709275633	0.801896865
			RNF111	1.437062705	1.370326769				KISS1R	1.512383543	1.822712358	MIIP	0.663159572	0.67071389
			RNF130	1.367374714	1.20875464				KLC1	1.253467866	1.326270508	MIS12	0.800461605	0.744626722
			RNF144A	1.272211663	1.331791056				KLC3	1.326975997	1.583629493	MIS18BP1	0.781350475	0.785354482
			RNF166	1.400674356	1.478298444				KLF10	1.390617585	1.274136606	MITF	0.745513596	0.751186648
			RNF167	1.277445716	1.2169798				KLF12	1.20634738	1.400533142	MKKS	0.72575305	0.589038748
			RNF187	1.316736524	1.225069598				KLF16	1.459334439	1.562189648	MKRN3	0.612015994	0.570411956
			RNF213	1.393352913	1.259078197				KLF2	1.689014497	2.023920387	MLLT10	0.773160538	0.702188187
			RNF214	1.646051276	1.413319386				KLF3	1.33435004	1.510287526	MLLT3	0.7826992	0.609842135
			RNF216	1.310663718	1.234933417				KLHDC4	1.504048148	1.214016418	MMAA	0.788024648	0.807951999
			RPH3AL	1.618271684	1.627592709				KLHL12	1.214348981	2.032840722	MMEL1	0	0
			RPS21	1.265838885	1.255647135				KLHL17	1.367638073	1.252938026	MND1	0.689897244	0.756105181
			RPS6KA1	1.400611496	1.261921003				KLHL2	1.452777158	1.386498056	MNS1	0.357085229	0.346306901
			RPS6KB2	1.285662589	1.46474284				KLHL21	1.336733279	1.412163002	MOB3B	0.450042008	0.832441352
			RPS6KL1	1.469166739	1.789644381				KLHL22	1.51022909	1.661092036	MORC2	0.776044478	0.73734186
			RPUSD1	1.302797878	1.422040776				KLHL35	2.153272239	1.90251759	MORF4L1	0.686379097	0.568047278
			RSAD1	1.318058171	1.281407761				KLHL36	1.369530881	1.874544039	MORF4L2	0.636323675	0.557752789
			RSPH1	1.636691547	1.381066667				KLHL5	1.419794074	1.349661768	MOSPD1	0.733317288	0.717128575
			RTBDN	3.026751592	2.171437639				KLK10	2.805048001	3.268639168	MOSPD2	0.789538243	0.668512156
			RTKN	1.227961804	1.22348705				KLK5	4.44517589	3.738071734	MPC2	0.619405612	0.695338828
			RTL10	1.281402033	1.245890029				KLK6	1.653212598	1.587996058	MPP2	0	0
			RTN4RL1	1.314056697	1.816425196				KLK7	2.621712122	2.027543424	MPP6	0.631462436	0.805753632
			RXRA	1.226147038	3.18735054				KLK8	1.425896048	1.406998387	MPST	0.612055741	0.649989756
			RYBP	1.943835728	1.333825071				KLRC3	1.94673637	1.331671682	MRC2	0.582677339	0.585131195
			S100A3	1.252938733	1.266003325				KMT2B	1.462587663	1.52431894	MRFAP1	0.699799659	0.662767537
			S100A4	1.553486037	2.036961488				KPNA1	1.386619301	1.577124869	MRFAP1L1	0.422314717	0.541565405
			S100A5	4.245444119	3.410785517				KRCC1	1.325197596	1.227970156	MRPL1	0.807937473	0.750457787
			SAAL1	1.244908565	1.367296733				KREMEN1	2.336700653	2.732265446	MRPL22	0.725653689	0.663834013
			SAC3D1	1.258318306	1.452215772				KREMEN2	1.349593272	1.91554445	MRPL3	0.773868802	0.702934347
			SAMD1	1.240630582	1.382579313				KRT15	3.057952924	3.356378601	MRPL45	0.741253702	0.717698523
			SAMD10	1.645480902	1.602955749				KRT19	1.797147348	1.745393841	MRPL48	0.812293849	0.780250513
			SAMD11	1.529938547	2.240958176				KRT7	1.394213295	1.215798286	MRPL49	0.829039347	0.788706066
			SAMD12	1.442123074	1.536391398				KRTCAP2	1.214193173	1.38730347	MRPL51	0.721173721	0.682826279
			SAMD4A	1.237059594	1.301219336				KSR1	1.938287307	1.848692726	MRPL57	0.722099159	0.74957126
			SARDH	1.383455625	1.216652914				L3HYPDH	1.211256245	1.234767924	MRPS15	0.779230393	0.803855725
			SAT2	1.368145689	1.274114907				LAMA5	1.762198021	1.93121131	MRPS16	0.539539029	0.581841582
			SATB1	4.679340938	3.119852399				LAMB2	1.383938121	1.213153259	MRPS17	0.7144509	0.684883856
			SBF1	1.41380666	1.227599403				LAMC1	1.56591127	1.35135082	MRPS18C	0.736155932	0.806180954
			SCAP	1.218943964	1.257746775				LATS2	1.68608173	1.344050999	MRPS22	0.731000011	0.684150534
			SCFD1	1.218400403	1.210653539				LDB1	1.394567486	1.274676862	MRPS27	0.739104745	0.782829338
			SCG2	1.68834643	6.328976035				LDLR	1.354803386	1.661402523	MRPS31	0.699596036	0.643685607
			SCLY	1.23696789	1.201870631				LDLRAP1	1.530719509	1.318002141	MSH2	0.695395115	0.679738054
			SCNN1A	1.289414506	1.222306189				LEMD2	1.271878711	1.249144148	MSL1	0.830818706	0.814093335
			SCO2	1.214615349	1.206561178				LETM1	1.286458122	1.307116421	MSL2	0.74098087	0.784913955
			SCUBE1	1.44969874	2.211135797				LGALS1	1.960323522	1.31737979	MSRB1	0.629463941	0.726937617
			SCYL1	1.768148083	1.404567757				LGALS3	1.399986107	1.249510184	MSX1	0.600990786	0.769550227
			SDHAF1	1.203160649	1.444712173				LGALS9	308.6	58.2	MSX2	0.700843534	0.779162239
			SDHB	1.48840813	1.502808474				LGALSL	1.27377147	1.400849945	MT1A	0.251967265	0.659679408
			SEC22A	1.562703464	1.218082455				LGR4	1.241439259	1.623623901	MT2A	0.7209348	0.761021597
			SEC24A	1.51820376	1.406828367				LHFPL2	1.469803136	1.585483853	MTA2	0.525193535	0.759925169
			SEC24D	1.402999933	1.372228613				LHPP	1.564992179	1.661297292	MTAP	0.686764304	0.576678565
			SELENON	1.361788618	1.380037021				LIF	9.207189717	8.801117619	MTERF1	0.72805889	0.749003539
			SELENOO	1.539757703	1.258058641				LIFR	1.49755144	1.231506521	MTF2	0.635191245	0.622281519
			SEMA3B	1.498878356	1.727594529				LIG4	1.484923497	1.329818763	MTFP1	0.755423165	0.826389595
			SEMA4B	1.214927217	1.362106503				LIMK1	1.613295918	1.486586849	MTHFD1L	0.791742693	0.576672376
			SEMA4C	1.706646645	1.438737787				LIMS2	2.148780488	5.143776487	MTIF3	0.702474346	0.664720136
			SENP3	1.338087313	1.493230641				LINGO1	1.325632623	2.180871526	MTMR11	0.666607134	0.815862027
			SERINC2	1.325265915	1.388243637				LIPT2	1.273436094	1.321704465	MTMR14	0.797411381	0.829604145
			SETD1A	1.25321947	1.219521083				LITAF	1.622804517	1.353763833	MTO1	0.823704607	0.59727686
			SETDB2	1.300600742	1.354409574				LIX1L	1.318789185	1.270866996	MTRF1L	0.686986211	0.805763735
			SETDB2-PHF11	1.300600742	1.354409574				LLGL2	1.399462603	1.318131106	MUC16	0	0
			SFXN1	1.34882878	1.264553258				LMBR1	1.312548384	1.329628288	MXD1	0.801246464	0.797965043
			SGCB	1.501926978	1.237454837				LMBRD2	1.236316897	1.381349541	MXD4	0.672780592	0.701906322
			SGTA	1.242794124	1.33947569				LMCD1	1.661951484	1.429774024	MYBL2	0.698478589	0.777501316
			SH2B1	1.291100265	1.292348106				LMF2	1.422938796	1.657824048	MYC	0.591742278	0.548021959
			SH2B2	1.763644712	1.502481333				LMNB2	1.23695807	1.211596939	MYH15	0	0
			SH3BGRL3	1.288323355	1.265965683				LOXL2	1.449892945	1.896194717	MYL6	0.554509672	0.509565468
			SH3BP1	1.432307581	1.473064652				LOXL4	1.56397814	1.563392226	MYL6B	0.69951239	0.777028085
			SH3BP2	1.247911254	1.516142644				LPCAT4	1.250624221	1.371059613	MYLIP	0.672944447	0.749805113
			SHARPIN	1.236039488	1.367328432				LPGAT1	1.354526492	1.225567031	MYO7A	0.496024663	0.298829787
			SHISA4	1.395974597	1.223178138				LPIN1	137.1	152.9	MYOM2	0	0
			SHOX2	1.264918609	1.471359963				LPIN3	1.247545929	1.389074496	N4BP1	0.704777344	0.723509149
			SHPRH	1.30704978	1.205367394				LRAT	1.329571194	1.315573279	N4BP2	0.781233311	0.754870398
			SHROOM2	2.392674189	1.851009719				LRCH3	1.816734891	1.39103786	N4BP2L2	0.71900366	0.48846819
			SIRPA	1.562331591	1.35455857				LRFN1	1.359406136	1.84626347	NAA60	0.784124264	0.792919722
			SIRT3	1.391351413	1.420836587				LRFN3	2.209415731	1.356015307	NAB2	0.743142847	0.674484258
			SKP2	1.25643389	1.620217652				LRFN4	1.422407431	2.113434211	NACA	0.712024431	0.625156309
			SLAIN2	1.256518708	1.254595929				LRMDA	1.343426554	1.53546074	NAF1	0.769788893	0.654244266
			SLBP	1.246159352	1.235083762				LRP11	1.532202677	1.343192282	NANP	0.726119511	0.756811559
			SLC10A4	1.234418359	1.335730036				LRP12	1.291531634	1.353771212	NANS	0.701209634	0.696817063
			SLC12A8	1.759291671	1.826020796				LRP3	1.334971946	1.374159298	NAP1L1	0.71766542	0.694647858
			SLC15A1	2770.4	2677.9				LRP4	1.319844614	1.878431785	NASP	0.563670163	0.469630596
			SLC22A18	1.441316336	1.246524727				LRP5	1.227196894	1.338132675	NCAM1	0.80943066	0.727587343
			SLC22A18AS	1.345772084	1.661795835				LRP5L	1.251476594	1.241278998	NCAPD2	0.651720023	0.555330583
			SLC25A1	1.252644741	1.691972804				LRPPRC	1.22571799	1.221813653	NCKAP1L	0	0
			SLC25A10	1.262655355	1.459274243				LRRC26	1.243987762	1.777963691	NCL	0.696179642	0.636992359
			SLC25A11	1.298687859	1.224558535				LRRC3	1.536590998	2.684454004	NCOA7	0.650409075	0.29714927
			SLC25A19	1.302225527	1.202167378				LRRC42	1.666810345	1.935092187	NCR3LG1	0	0
			SLC25A29	1.301494666	1.329028667				LRRC57	1.336854561	1.316998415	NDEL1	0.760395386	0.786730253
			SLC25A39	1.337321256	1.277871985				LRRC59	1.295454378	1.524243314	NDUFA2	0.716789609	0.775938575
			SLC25A4	1.479902151	1.47739131				LRRC75A	1.310674257	1.38415398	NDUFS5	0.62640622	0.534860533
			SLC25A42	1.356356389	1.291050637				LRRC8E	1.224856931	1.253652592	NDUFS8	0.797828628	0.778269008
			SLC27A4	1.312640377	1.384271568				LRRFIP2	240	5.711328976	NECTIN3	0.755142897	0.680569172
			SLC29A4	1.354257095	75.7				LRRN2	1.26824335	1.323737469	NEDD4	0	0
			SLC2A4RG	1.351007026	1.682768728				LSM14B	1.491916847	1.392468689	NEIL1	0.737197287	0.773225476
			SLC2A6	1.224149648	1.305885387				LSM4	1.299545897	1.354315011	NEK9	0.784194558	0.757069655
			SLC30A1	1.520867504	1.318813374				LSS	1.264446605	1.928096571	NEMP1	0.67566447	0.80133419
			SLC30A4	1.276479686	1.289874364				LTBP4	1.22142714	1.94079843	NEMP2	0.735759525	0.829678311
			SLC35F6	1.379968935	1.242442829				LTBR	1.522030033	1.584365073	NES	0.495046736	0.754621603
			SLC35G1	1.201746888	1.271500843				LTV1	1.231986012	1.205642305	NFAT5	0.680461942	0.603440224
			SLC38A10	1.392648349	1.403993398				LYPD6	1.550199737	2.116235062	NFE2L1	0.632961942	0.650373026
			SLC38A7	1.244985575	1.654879178				LYPLA1	1.706590307	1.64159185	NFIA	0.661439815	0.716486791
			SLC39A10	1.81003715	1.238822515				LYRM1	1.382074101	1.242803322	NFIL3	0.706336779	0.627674089
			SLC39A13	1.390871318	1.263697091				LYST	1.957025678	12.16707617	NFKBIL1	0.774688909	0.431442509
			SLC44A2	1.31491641	1.43788204				LZTS2	1.474173446	1.487302146	NFRKB	0	0.659003831
			SLC45A1	1.309115949	1.205691262				LZTS3	1.662711912	2.190915438	NFU1	0.799578009	0.804091144
			SLC46A1	1.448604757	1.660696137				MAF1	1.597199715	1.349154231	NFYC	0.71932161	0.673440491
			SLC52A3	1.499372816	1.607272956				MAFK	1.511827181	1.48243042	NGDN	0.690028329	0.539526691
			SLC5A3	1.664983559	1.332302041				MALL	1.401575892	1.648528386	NGFR	0.65741167	0.800908962
			SLC5A5	362.4	429.4				MAMDC2	1.810841297	2.579165816	NICN1	0.665472535	0.689932322
			SLC6A20	3.289152478	2.355015674				MAML2	1.939484127	2.586260431	NIF3L1	0.736198013	0.593903613
			SLC7A2	1.205455801	1.477600952				MAMLD1	1.237787356	1.378916338	NIPA2	0.784309468	0.702777968
			SLC9A3R2	1.276119659	1.815723855				MAN1A2	1.62436934	1.764299383	NIPAL3	0.776959455	0.77595165
			SLC9A6	1.392334767	1.335214636				MAN1C1	1.585955512	1.464435268	NIT1	0.757816833	0.638862955
			SLC9B2	1.2511095	1.205199517				MAN2A1	1.226717179	1.472379596	NKTR	0.802913068	0.785865427
			SLCO3A1	1.3099022	1.898461594				MAN2B2	1.288727811	1.582540466	NLRX1	0.648098844	0.778540341
			SLCO4A1	1.316200611	1.2570994				MANF	1.320090223	1.423389062	NME4	0.558085856	0.823039608
			SMAD2	1.579925013	1.203565543				MAP1LC3B2	2.393903075	2.288083148	NMRAL1	0.686605327	0.661972805
			SMAP1	1.357220916	1.298486863				MAP1S	1.223053406	1.231485889	NMT1	0.643825941	0.591210274
			SMARCA4	1.349376201	1.213905715				MAP2	1.595207569	1.948274335	NOCT	0.606904173	0.713668443
			SMIM11A	1.252205246	1.404363058				MAP2K2	1.331451472	1.43376271	NOL11	0.80427664	0.712057852
			SMIM20	1.242819856	1.465428927				MAP2K4	1.493834017	1.454108694	NOLC1	0.779470658	0.683208274
			SMIM7	1.504794936	1.306166532				MAP2K7	1.303604201	1.461737182	NOMO1	0.655138054	0.756222573
			SMN1	1.366203596	1.214178132				MAP3K12	1.232787489	2.058956053	NONO	0.644511961	0.461988659
			SMYD2	1.21455117	1.410689061				MAP3K21	1.252475804	1.459042764	NOP10	0.825857727	0.64197015
			SMYD3	1.598943538	1.267248848				MAP3K5	1.329370178	1.445780866	NOP2	0.761382934	0.672919634
			SNCG	258.9	505.2				MAP3K6	1.216116311	1.488999011	NOP53	0.794966621	0.647384586
			SND1	1.741527981	1.554947092				MAP3K9	1.228532878	1.492238478	NOP58	0.658636329	0.552155382
			SNED1	1.386016164	1.250153758				MAP4K3	1.387989512	1.469691086	NOSIP	0.792625225	0.630254801
			SNX1	1.540614547	1.207668932				MAP7D1	1.405304504	1.262028661	NPEPL1	0	0
			SNX2	1.396934541	1.284079795				MAPK1	1.23532316	1.238431776	NPM1	0.685848879	0.682131386
			SNX21	1.359466099	1.321596061				MAPK11	2.812931431	2.873522774	NPNT	0.54511602	0.833208562
			SNX33	1.295050087	1.32495003				MAPK12	1.494883044	1.821996404	NPR2	0	0
			SNX4	1.752353044	1.381249834				MAPK13	1.203243203	1.284345075	NPRL3	0.7820803	0.831649512
			SNX6	1.363516259	1.272837494				MAPK3	1.425011038	1.440573462	NPTN	0.568483565	0.56254454
			SNX7	1.357747165	1.623759925				MAPK8IP1	1.543786679	1.272759177	NR1D2	0.71759784	0.682178878
			SORBS1	1.292912221	1.264521943				MAPK8IP2	1.857768852	2.039517091	NR1H2	0.645256817	0.693303925
			SORT1	1.287425218	1.376335906				MAPK8IP3	1.462815668	1.30600249	NR2F1	0.456065614	0.35713277
			SOX4	1.571451041	1.397890167				MAPKAPK2	1.442040444	1.318648456	NR2F2	0.654375903	0.564535923
			SOX8	1.494405191	1.640137177				MAPKAPK5	1.314098033	1.387276557	NR4A1	0.818805997	0.753555258
			SPACA9	1.26392911	1.221492091				MAPRE1	1.297655118	1.307954895	NR4A2	0.67963259	0.741686453
			SPATA33	1.205090133	1.294524141				MAPT	1.461819396	1.285050971	NRDC	0.718791887	0.639663454
			SPECC1	1.380748868	1.323131478				MARK2	1.351960597	1.253305826	NRF1	0.664532047	0.736352871
			SPEG	1.856500956	1.881792649				MARVELD3	1.268696043	1.500810598	NRG2	0.530396354	0.722628429
			SPG21	1.306798512	1.450998799				MAST2	1.415835524	1.543510747	NSMCE1	0.658912773	0.582401072
			SPINDOC	1.291424988	1.440066899				MAST3	1.653928584	1.969930326	NSRP1	0.769520977	0.607486519
			SPIRE2	1.46024781	2.134425613				MAT2A	1.232545106	1.233326226	NT5C	0.71917281	0.603623177
			SPNS1	1.367363432	1.419857997				MAZ	1.386073531	1.781978084	NT5E	0.778988841	0.80513389
			SPNS2	1.734051698	1.979601397				MBD1	1.748739744	1.243797076	NTSR1	0.82730488	0.744100953
			SPPL2A	1.200213006	1.215442235				MBD3	1.339068532	1.331455627	NUCKS1	0.714874707	0.616599038
			SPPL3	1.276232919	1.263024907				MBNL3	2.059052858	2.49660387	NUDC	0.698557981	0.652502059
			SPRY1	1.328804692	1.658208334				MBOAT2	2.176524234	2.056834482	NUDCD2	0.682110222	0.831710329
			SPSB3	1.229778005	1.280026624				MC1R	1.442091651	1.499873049	NUDT16	0.699634286	0.824657624
			SPTAN1	1.333364518	1.443092403				MCIDAS	1.231907951	1.221140342	NUDT16L1	0.503831369	0.753172859
			SPTB	1.597956825	1.440065458				MCM3AP	1.426951725	1.389249764	NUDT2	0.579431031	0.732572777
			SQSTM1	1.40640334	1.21927186				MCOLN3	1.553113812	1.390907058	NUF2	0.752219052	0.658543642
			SRCIN1	1.225596713	1.220895039				MCPH1	1.45361847	1.302933054	NUFIP2	0.712560813	0.829568582
			SRM	1.218296738	1.542978572				MCRIP1	1.257971349	1.74376712	NUMA1	0.76538574	0.819511807
			SRP68	1.46555826	1.224203822				MDFI	1.234191785	1.355179212	NUP133	0.694296412	0.710681214
			SRSF1	1.640001182	1.353764506				MDK	1.241078747	1.781681215	NUP153	0.629091536	0.638582997
			SSBP3	1.679455446	1.767054848				MECP2	1.98417689	1.500869198	NUP205	0.713862087	0.771922073
			SSC4D	1.55126498	1.764899301				MED11	1.293827205	1.274581866	NUP35	0.652774826	0.572895858
			SSH1	1.655334991	1.201604218				MED9	1.987953025	1.271039175	NUP50	0.754459972	0.734439355
			SSH3	1.439920348	1.639005606				MEF2A	1.877109423	1.475878327	NUP62	0.647291059	0.530186937
			SSTR5	1.894034618	2.541945712				MEGF11	1.239207625	1.291554008	NUP85	0.688281226	0.623332547
			SSX2IP	1.404863995	1.404982466				MELTF	1.576484728	2.482627373	NUSAP1	0.651186905	0.7414095
			ST6GALNAC4	1.498064387	1.251557241				MERTK	1.292232043	1.23997578	OARD1	0.676296984	0.656893555
			STAT3	1.49724776	1.336469354				MESP1	1.2652766	1.341457239	OAZ1	0.640360382	0.532817128
			STEAP3	2.621209936	2.32027123				MEST	137.1	1.903050109	OAZ2	0.770363437	0.793181763
			STK16	1.479086735	1.26813918				METRN	1.718109432	2.947559399	OCEL1	0.665160825	0.762279516
			STK25	1.270813784	1.32932382				METTL25	1.214732853	1.450119257	OCIAD1	0.65215588	0.50684697
			STK3	1.212004681	1.402254987				METTL26	2.472398735	1.776540186	ODF2	0.765521075	0.811632531
			STK39	1.293007495	1.202805988				METTL27	1.636565797	1.510329694	OGDH	0.767644099	0.724460225
			STMN3	1.365509035	1.423545229				METTL5	1.630452962	1.547825114	OGFOD2	0.730256311	0.716699141
			STN1	1.27800908	1.212208547				METTL9	1.349451991	1.30584499	OGT	0.738614215	0.492130115
			STOML1	1.565096094	1.980832107				MFSD12	1.210009889	1.206265628	OIP5	0.642680246	0.741246652
			STX1A	1.717664639	1.206165021				MFSD5	1.244404256	1.491795966	OLA1	0.772347318	0.703715574
			STX4	1.379518427	1.74483923				MGA	1.370634849	1.294214295	OPHN1	0.810882504	0.726792529
			SUDS3	1.352817929	1.340905341				MGAT4A	1.257086687	1.366749972	ORC2	0.645297766	0.664790311
			SULT1A1	2.443310175	2.607918925				MGAT5	1.514731174	1.252313644	ORC4	0.831455995	0.806997564
			SULT1A2	1.895310902	1.811128029				MGLL	2.62052178	2.678027677	OSBPL9	0.679653452	0.817171414
			SUSD2	1.847998216	2.741483516				MGMT	1.487283186	1.587340788	OSER1	0.758724894	0.58321524
			SWAP70	1.247457893	1.257850285				MGRN1	1.39543694	1.386943923	OSR1	0.619296465	0.577137852
			SYNE4	1.294446091	1.437825669				MIB1	1.601313084	1.626384669	OTUD3	0.705729158	0.754054316
			SYNGR3	2.498724598	2.066859166				MIB2	1.214977004	1.542275953	OXSM	0.828092145	0.81054948
			SYP	1.396403998	1.206473361				MICAL2	1.237172571	1.488377915	PA2G4	0.704327557	0.735894729
			SYT7	1.556694548	1.657403257				MICAL3	1.242521517	1.629189995	PAAF1	0.716583876	0.826234567
			TAB2	1.467983725	1.228098739				MICALCL	1.834396215	1.722230185	PADI2	0.23390012	0.529766675
			TADA2B	1.209474219	1.295672375				MICALL1	1.427817571	1.370811375	PAFAH2	0.658351573	0.586297307
			TADA3	1.543413368	1.385577383				MICALL2	1.580714329	1.697291138	PAICS	0.832553839	0.742921108
			TAF1C	1.268812854	1.346869122				MID2	1.437236441	1.35398297	PAIP2	0.638014652	0.597028881
			TAF5L	1.279787558	1.330253626				MIDN	1.30328055	1.400440259	PAIP2B	0.539803123	0.555375697
			TAF6	1.316844222	1.487362337				MIEN1	1.239430296	1.306399012	PALLD	0.447926119	0.503049238
			TAF6L	1.230635127	1.545022807				MIER2	1.373363011	1.269465216	PAN2	0.696286796	0.748870521
			TAGLN2	1.611382837	2.387998356				MIF	1.241236564	1.528333563	PAN3	0.710145029	0.737491833
			TALDO1	1.263140268	1.326039628				MIF4GD	1.301480651	1.30611936	PAQR5	0	0
			TANC2	1.391963012	1.516671404				MIIP	1.279365641	1.258936836	PARD6B	0.739978836	0.653891721
			TAOK1	1.426512065	1.388923042				MINDY4	1.26227647	1.221411049	PARM1	0.627715819	0.555632769
			TAP1	1.22047314	1.238276914				MINK1	2.09799975	1.928811804	PARS2	0.534959723	0.538552222
			TARBP2	1.336399538	1.252009032				MIOS	1.535513381	1.33460682	PATZ1	0.748223372	0.665650789
			TASP1	1.676889924	1.257044072				MISP3	1.484020972	1.292204896	PAX8	0	0
			TAZ	1.226691071	1.653588788				MKI67	1.383780233	1.221388732	PBDC1	0.670321183	0.774306421
			TBC1D10A	1.39413356	1.388380565				MKLN1	1.312781083	1.340706308	PBK	0.758529654	0.771547241
			TBC1D10B	2.140789203	1.484235658				MKNK1	1.248647978	1.289334553	PBLD	0.734404813	0.831049305
			TBC1D14	1.301857084	1.323386464				MKNK2	1.752183106	1.392714733	PBRM1	0.424617459	0.351539394
			TBC1D25	1.485121994	1.389558006				MKRN2	1.220127697	1.276956303	PCBD2	0.676359121	0.65028261
			TBC1D2B	1.304492162	1.40754452				MKS1	1.583743503	1.380877332	PCBP1	0.746916291	0.577239042
			TBC1D9B	1.384289086	1.605709714				MLEC	1.21806057	1.294301002	PCBP2	0.613433914	0.504238534
			TBCB	1.64226318	1.438600328				MLF2	1.285458172	1.53105504	PCCB	0.759428221	0.785610665
			TBCD	1.401821795	1.387794556				MLST8	1.4188705	1.481301796	PCDHGA2	0	0
			TBL2	1.337246646	1.210526982				MLXIP	1.273216322	1.299158766	PCDHGA5	0	0.49486231
			TBXA2R	1.201859572	2.204390329				MLXIPL	1.250770543	1.57260019	PCDHGA6	0	0
			TC2N	1.410708468	1.682086614				MMAB	1.280561503	1.237432132	PCDHGA7	0	0
			TCAIM	1.4200231	1.241822933				MMD	1.207323666	1.5352821	PCDHGA9	0.72681883	0.593395761
			TCEA3	3340.1	30.16994751				MMP17	1.39266329	1.453273674	PCDHGB2	0	0.304964539
			TCFL5	1.431987282	1.326834741				MNX1	1.55705799	1.501719622	PCDHGB6	0	0
			TCN2	1.438549495	1.558987559				MOB1A	1.263772716	1.236756681	PCF11	0.511625028	0.37570156
			TCP1	1.227266822	1.2262673				MOB2	137.1	109.2	PCK2	0.615191522	0.375002966
			TDRD7	1.304472843	1.350976933				MOB3A	1.28593906	1.279443551	PCLAF	0.57125561	0.767680797
			TEAD3	1.231191276	1.248823628				MOCS1	1.551587964	1.356987473	PCNA	0.637632403	0.683182862
			TELO2	1.242874805	1.203391652				MON2	1.32484049	1.206334491	PCNP	0.707628881	0.761644079
			TERT	1.736354523	1.834401654				MORN1	1.344957752	1.328983846	PCOLCE	0	0
			TESK1	1.317391866	1.342790084				MOSMO	1.394601626	1.254662636	PDCD4	0.52064592	0.280118413
			TEX261	1.28368947	1.367760701				MPP3	1.281955849	1.752824198	PDCD7	0.672767065	0.733011817
			TEX264	1.538744391	1.465565977				MPPE1	1.391698252	1.270395159	PDE3B	0.474521818	0.691401556
			TFDP1	1.308489371	1.524531243				MPZL1	1.495955637	1.237385228	PDE6D	0.738338305	0.813201299
			TFEB	1.410833025	1.466811824				MRAP2	1.262646825	1.443260615	PDF	0.832428907	0.810270481
			TGDS	1.460215408	1.287729308				MRGBP	1.333622661	1.628301732	PDGFRL	0.661078123	0.463578617
			TGFB1	1.209903926	1.62068112				MRM1	1.358011112	1.47634473	PDK4	0.589193092	0.55809989
			TGFBR3L	1.37743425	1.498681608				MROH1	1.605021112	1.581472114	PDLIM7	0.767501262	0.828169198
			THBS1	1.307899195	1.905382048				MROH6	1.26294228	1.502119427	PDP1	0.760487397	0.612111895
			THEM6	1.288070526	1.326324128				MRPL12	1.203828305	1.217051909	PDS5B	0.764469875	0.784703529
			THRA	1.554437774	2.04739011				MRPL21	1.50169734	1.248694379	PDXP	0.645853541	0.79911513
			TICAM1	1.481818346	1.270245341				MRPL36	1.394389072	1.595826123	PEAK1	0.631687871	0.677253079
			TIMM22	1.361915503	1.271256874				MRPL38	1.254269746	1.213576414	PELI2	0.615463057	0.76120468
			TINAGL1	1.518059728	1.237421401				MRPL40	1.21354686	1.400874431	PELO	0.733653897	0.744742716
			TJP3	1.940952681	2.064221649				MRPL41	1.35961411	1.826678856	PELP1	0.660720717	0.687535153
			TLE1	1.460964871	1.35504115				MRPS23	1.37674609	1.414660565	PEX11G	0.789869368	0.830452718
			TLK2	1.414158869	1.203455015				MRPS5	1.373131843	1.420027545	PEX2	0.769300986	0.708633045
			TLR1	2.026614481	3.174745661				MRPS6	1.918984289	1.435983524	PFAS	0.718980052	0.542427378
			TM7SF2	1.299338585	1.516544773				MSANTD4	1.518636303	1.354907604	PFDN1	0.722506116	0.575608828
			TM7SF3	1.407847927	1.251868334				MSH6	1.227072924	1.344208014	PFDN2	0.757307058	0.630278753
			TMC6	1.303119588	1.497124495				MSI1	1.332580979	1.21512741	PFDN5	0.649341648	0.599168787
			TMC8	4.416311301	2.134741784				MSL3	1.575960773	1.896601516	PFKP	0.778215084	0.628471116
			TMCO3	1.651291534	1.309516326				MSLN	1.231570966	1.258452372	PFN1	0.811470585	0.794739683
			TMED8	1.257134142	1.365289041				MSN	1.689560236	1.445121951	PGAP3	0.655716512	0.679719212
			TMEM104	1.263006142	1.219512195				MSRB2	1.621797945	1.243234603	PGBD3	0	0
			TMEM115	1.560310429	1.232027912				MSRB3	1.857347876	1.707131826	PGGT1B	0.740229688	0.809746364
			TMEM120A	1.324705402	1.861026814				MSX1	1.472001806	1.476526905	PGK1	0.767170143	0.804059803
			TMEM127	1.431772679	1.25337234				MT1G	2.749599145	1.702851711	PGLS	0.66305747	0.675445326
			TMEM128	1.289571237	1.366483519				MT2A	1.344480604	1.373107356	PHB	0.752439654	0.756882581
			TMEM132A	1.234797452	1.542796013				MTA1	1.476763259	1.882469773	PHB2	0.70069954	0.680701052
			TMEM151A	1.864906694	1.771600825				MTA3	1.451721557	1.687243533	PHC2	0.656816585	0.629603098
			TMEM170A	1.26923322	1.216725608				MTCH2	1.325636379	1.227095361	PHC3	0.65424639	0.734821485
			TMEM181	1.511942396	1.452432135				MTCL1	2.056489896	1.903869435	PHF14	0.76472449	0.679984974
			TMEM184A	1.259626856	1.318843869				MTFMT	1.489223534	1.263419805	PHF21A	0.680066603	0.662979851
			TMEM184B	1.278940892	1.528330195				MTFR1L	1.207627277	1.248210163	PHF3	0.796474092	0.830930181
			TMEM185A	1.251333497	1.420789248				MTM1	1.577958875	1.448246813	PHGDH	0.328279569	0.20310732
			TMEM185B	1.306391459	1.409465109				MTMR1	1.242243575	1.297116885	PHIP	0.80839678	0.831811
			TMEM199	1.373760047	1.306093817				MTMR10	1.306757447	1.330241196	PHKA1	0.624305355	0.628075951
			TMEM214	1.404130751	1.311562365				MTMR9	1.30895939	1.33157637	PHLDB2	0	0
			TMEM223	1.26892106	1.431896287				MTRNR2L1	2.336431641	1.915337548	PIBF1	0.651600666	0.595107026
			TMEM237	1.336049546	1.311111535				MTRNR2L2	2.309355399	1.787325912	PIEZO1	0.633187924	0.642876107
			TMEM243	1.331378036	1.34654181				MTRNR2L6	2.010953428	2.88244249	PIF1	0.809936311	0.779312803
			TMEM248	1.447150544	1.332621098				MTRNR2L8	1.666325819	1.32261994	PIGK	0.771609863	0.779723839
			TMEM25	1.58917201	1.620811081				MTUS1	2.182279859	1.788204956	PIGL	0.761432861	0.732014185
			TMEM39A	1.309639664	1.238689566				MVB12A	1.949153815	2.014485816	PIGP	0.703210831	0.781549229
			TMEM44	1.318445449	1.207071976				MVD	1.248945688	1.487152834	PIGV	0.756926762	0.810768099
			TMEM52	1.229710464	1.278221587				MVK	1.285013231	1.244135359	PIGW	0.795046738	0.757590971
			TMEM59L	1.615905849	1.884301821				MVP	1.994836003	2.247417599	PIH1D1	0.550822884	0.573956351
			TMEM63A	1.371611639	1.597050559				MXRA7	1.349557967	1.688927512	PIK3C2B	0.822586163	0.624647636
			TMEM63C	1.25011756	1.387174995				MYEOV	2.317502226	1.999888644	PIK3CB	0.754587974	0.754041439
			TMEM64	1.402225645	1.206370263				MYH14	1.751074155	1.951000956	PIM1	0.628310097	0.626495337
			TMEM87B	1.44345316	1.233863801				MYH9	1.237180641	1.204712699	PIN4	0.585114616	0.527528347
			TMSB15A	1.247283115	1.377858147				MYL9	1.904275314	1.784176082	PIP5K1A	0.776048107	0.597977824
			TMTC4	1.409459446	1.682914032				MYLK	1.614746937	1.744169579	PITHD1	0.725098076	0.756147584
			TMUB1	1.360415341	1.316189095				MYO18A	1.709229187	1.975591557	PITPNM2	0	0
			TNFRSF18	1.237673952	1.9147549				MYO1B	1.263226508	1.357240294	PITX3	0.62870362	0.802364498
			TNIP1	1.428474908	1.274403531				MYO1C	1.83722839	1.292969871	PJA2	0.789635584	0.563825351
			TNNC1	2.941674506	4.196677657				MYO5A	1.411566098	1.413718655	PKD1	0.696154146	0.823355602
			TNS2	1.357464548	1.683397683				MYO5B	1.260417037	1.529914082	PKIB	0.673784427	0.580774333
			TNS3	1.226534186	1.274716977				MYOF	1.274172313	1.2721879	PLA2G6	0.636534318	0.571275862
			TOLLIP	1.379952289	1.226774032				MYORG	1.709945424	1.743959943	PLAGL1	0	0
			TOMM22	1.287648708	1.305808486				MYPOP	2.098645909	1.812395803	PLAT	0.417660185	0.647996069
			TOMM70	1.274851162	1.258051244				MYRF	2.038118988	1.533436831	PLAUR	0.66988539	0.741185766
			TONSL	1.487741642	1.601062331				MZT2A	1.333105013	1.570576638	PLCB2	0	0.220467033
			TOP3B	1.29291642	1.343715367				N4BP3	1.317903458	1.704504991	PLEKHA2	0.626658541	0.689324645
			TOX2	1.565372327	1.69403392				NAA10	1.541626989	1.494574021	PLEKHA6	0	0
			TP53I13	1.389893028	1.711931994				NAA25	1.245845742	1.216724715	PLEKHG6	0.748631676	0.833283551
			TP53INP1	1.374913061	1.582303944				NAA30	1.591440331	1.316375449	PLEKHM3	0.803993726	0.797026239
			TPBG	1.378146355	1.620869804				NAA40	1.306669452	1.678191855	PLEKHO1	0.695930803	0.731404604
			TPRN	1.312579758	1.329579623				NAAA	1.4059876	1.571832374	PLK4	0.715058506	0.648830122
			TPST2	1.505130892	1.30554964				NABP2	1.43638249	1.331210461	PLTP	0	0
			TRABD	1.456551323	1.598471128				NACC1	1.80085456	2.387242208	PMAIP1	0.756600674	0.584434058
			TRAF3IP1	1.317348933	1.552654256				NACC2	1.562704993	1.932878576	PMEL	0.7938476	0.735815054
			TRAK2	1.313890889	1.226872094				NADSYN1	1.845231717	1.285121401	PMF1	0.633935341	0.588777741
			TRAPPC1	1.631603769	1.453790363				NANOS1	1.218359532	1.73478524	PMF1-BGLAP	0.633935341	0.588777741
			TRAPPC10	1.248930236	1.230190477				NAPB	1.279393277	1.253063875	PMM1	0.693768744	0.495530016
			TRAPPC12	1.350608866	1.221470392				NAPEPLD	1.471612454	1.401306786	PMS2	0.747922997	0.702453898
			TRAPPC2L	1.373900081	1.602013634				NARF	1.214270985	1.558474225	PNISR	0.794823117	0.688564702
			TRAPPC5	1.826895966	1.518650959				NAT9	1.349965872	1.329721638	PNMA1	0.540339488	0.679522855
			TRAPPC9	1.263291538	1.341660353				NATD1	1.670058918	1.638369901	PNN	0.651914522	0.572214771
			TRHDE	1.274680351	2.304473709				NAV2	1.244095868	1.229703425	PNP	0.597534263	0.760291039
			TRIM21	1.215207235	1.35796421				NAXE	1.30500003	1.203461532	PNPLA2	0.57671775	0.784458723
			TRIM32	1.280881235	1.390951771				NBL1	1.898179005	2.117929242	PNRC1	0.69747993	0.433220778
			TRIM68	1.203502219	1.201139511				NCAPG2	1.227015355	1.350638386	PNRC2	0.741125328	0.703545014
			TRIM8	1.337503097	1.291445819				NCAPH2	1.386546851	1.66262106	POC1A	0.796450487	0.732811218
			TRIP10	1.424215299	1.361782246				NCBP3	1.376384543	1.391531306	PODXL	0.627441904	0.820422276
			TRIP13	1.247245233	1.452269479				NCK2	1.283568506	1.504381847	POLA1	0.738606393	0.707234593
			TRIQK	1.533273635	1.440841181				NCKIPSD	1.248023751	1.595656065	POLD3	0.704548768	0.49793742
			TRPT1	1.364247282	1.708695182				NCLN	1.289303481	1.437995749	POLE3	0.717609679	0.784136324
			TSC2	1.482896193	1.520751124				NCOA1	1.297576717	1.268064351	POLQ	0.770097297	0.701477712
			TSC22D1	1.447286701	2.006476051				NDC1	1.214734286	1.263828094	POLR1A	0.786561545	0.672823424
			TSEN54	1.200668667	1.838703054				NDOR1	1.241042386	1.404974936	POLR2A	0.737869298	0.686229947
			TSNARE1	1.367420137	1.223807415				NDRG2	1.657303925	1.427501381	POLR2E	0.777971782	0.707191538
			TSNAX	1.55562265	1.532616054				NDUFA10	1.342891451	1.249856481	POLR2J2	0.596025245	0.544645809
			TSPAN17	1.259398186	1.235649391				NDUFA4	1.27071924	1.256873798	POLR2J3	0.602354728	0.546732684
			TSPAN18	1.575429894	1.331956192				NDUFAF3	1.246135087	1.254899805	POLR2K	0.726852708	0.627246874
			TSPAN33	1.255378279	1.517459762				NDUFB9	1.208559333	1.214594953	POLR3K	0.676895557	0.784700469
			TSPAN4	1.689996811	2.043334776				NDUFS1	1.53659114	1.415094036	POMGNT1	0.730145461	0.128085106
			TSPAN9	1.333146327	1.386679419				NDUFS7	1.843689271	1.578411522	POMK	0.774525234	0.707442036
			TSR1	1.35379224	1.404535826				NDUFV2	1.467516567	1.23126294	POP4	0.721671231	0.69200844
			TSR3	1.987242053	2.335556117				NDUFV3	1.251649236	1.266279059	POR	0.562949343	0.506649209
			TTC21A	1.323936581	1.447984642				NEIL2	1.364351852	1.203673009	POU2F1	0.615278688	0.610773057
			TTC9	1.533955189	1.884107756				NEK3	1.477935334	1.616849105	PPAN	0.739011233	0.752274463
			TTLL3	1.75708942	1.996100421				NEK5	1.621141541	1.517084725	PPAN-P2RY11	0.739613699	0.752274463
			TTYH3	1.64307672	1.58969939				NEK6	1.512965571	1.694901138	PPARD	0.661010905	0.614383449
			TUBG1	1.903666555	1.569120511				NEMP2	1.354186424	1.649514619	PPAT	0.755086425	0.741400293
			TUBGCP2	1.275829622	1.469083344				NENF	1.743475338	1.555714842	PPCDC	0.71815196	0.635808625
			TUBGCP4	1.441805841	1.268771385				NEO1	1.364922588	1.348386805	PPFIBP1	0.750480546	0.700300187
			TULP3	1.525899423	1.503212746				NEPRO	1.299668352	1.345294987	PPIL3	0.831857229	0.634630667
			TULP4	77.6	101				NES	1.282372856	1.405614856	PPIP5K2	0.739696391	0.596785339
			TWIST1	2.767431375	1.681442716				NET1	1.516746613	1.303271441	PPM1B	0.632616713	0.70819479
			TXNRD3	1.304691026	1.243679491				NF2	1.576583665	1.447821179	PPP1CB	0.809064335	0.760808752
			TYMP	1.227837598	1.490291701				NFATC2	2.060771681	1.203885309	PPP1CC	0.584541338	0.562424439
			UBA2	1.407684048	1.3640821				NFATC3	1.227914411	1.305908532	PPP1R15A	0.815231459	0.758523848
			UBAC1	1.251769918	1.438547309				NFE2L3	1.613454002	1.862671379	PPP1R15B	0.779675205	0.566967826
			UBE2D1	1.46658214	1.52737645				NFKBIE	1.761135807	1.564428634	PPP1R8	0.772956219	0.669239965
			UBE2E3	1.46899452	1.243823781				NFYA	1.222254618	1.36403072	PPP2R2A	0.819495139	0.689894007
			UBE2F	103.5	227.3				NHS	1.634220159	1.336347635	PPP2R2C	0	0
			UBE2G2	1.400325612	1.280570173				NIN	1.379254246	1.661609383	PPP3CA	0.596052477	0.462588988
			UBE3D	1.496719614	1.209306268				NINL	1.327825334	1.337529887	PPP4R2	0.793106659	0.736109091
			UBL4A	1.42660365	1.667640312				NIPA1	1.309407524	1.294144536	PPP4R3A	0.677579571	0.561231643
			UBQLN4	1.555924378	1.431612086				NIPSNAP1	1.241966301	1.309877752	PPP6R1	0.629534456	0.651640499
			UBTD2	1.901063661	1.499989244				NIPSNAP3A	1.701814209	1.431147526	PPRC1	0.794337072	0.69813607
			UCKL1	1.334183375	1.715471907				NKIRAS2	1.537490445	1.429560841	PPWD1	0.653025506	0.583367345
			UGT8	1.378714811	1.552242467				NKX1-2	1.24322796	1.222386437	PQBP1	0.528619626	0.594749645
			UHRF1BP1L	1.293896679	1.238167772				NME1	1.205363708	1.407632566	PRC1	0.742032456	0.70862254
			ULBP2	1.290044189	1.320800338				NME2	1.287317482	1.570554229	PRDM1	0.481706805	0.790504973
			UNC119	1.311158988	1.635895669				NME3	1.259371665	1.354299192	PRDM10	0.732007771	0.779165561
			UNC13A	1.321429004	2.350607844				NME4	1.438441564	2.01040208	PRDM11	0.76346601	0.79299044
			UNC13D	1.276175186	1.394566417				NMT2	1.30752722	1.485916979	PRDX1	0.76145917	0.672589225
			UPK3B	2.031383738	1.69781892				NOC4L	1.21773083	1.246665556	PRDX3	0.770043781	0.812195802
			UQCRB	1.304280924	1.261349146				NOD2	1.320022168	1.363425472	PRDX5	0.685164618	0.722399257
			UQCRC1	1.242603528	1.418544995				NOL3	1.526145293	1.354559794	PRELP	0.167017208	0.460226458
			URB2	1.285230424	1.332586347				NOL4L	2.28014974	2.828825676	PREPL	0.545114123	0.47890784
			URI1	1.773018138	1.428297194				NOL7	1.456694543	1.337225159	PRIM1	0.578082265	0.574928489
			USF2	1.326246646	1.28490252				NOL9	1.318565186	1.236006981	PRIM2	0.292464916	0
			USP18	1.204326082	1.25397502				NOM1	1.307738083	1.351983335	PRIMPOL	0.553621901	0.628838619
			USP19	1.499008763	1.364428773				NOTUM	3.538856691	2.944418626	PRKDC	0.669494522	0.726305676
			USP22	1.419499125	1.274900231				NPAS2	1.277972775	1.667689846	PRKRA	0.713571072	0.683138031
			UTP4	1.355515652	1.219535293				NPDC1	1.225221641	1.399050707	PRMT1	0.716989819	0.700803319
			UVSSA	1.268421157	1.283753059				NPHP4	1.419082505	1.224865825	PRNP	0.660494048	0.486344146
			UXS1	1.46654538	1.211283359				NPR2	137.1	65.5	PROSER2	0.800612301	0.790861921
			UXT	1.505460576	1.372707026				NPRL2	1.339285504	1.34635234	PROSER3	0.622478715	0.475240253
			VAMP2	1.563115435	1.310092093				NQO2	1.305458789	1.24182219	PRPF18	0.832997895	0.678138448
			VCPKMT	1.578726878	1.321281021				NR2F6	1.345213311	1.736846321	PRPF19	0.772686932	0.759351105
			VEZF1	1.77783593	1.911624106				NR3C1	1.917854306	1.690982128	PRPF3	0.514361052	0.636012531
			VGF	1.615524214	1.836935397				NR6A1	1.796202685	1.444107254	PRPF38B	0.6911507	0.696276798
			VIPR1	2.766277129	2.702880658				NRBP2	1.498044452	1.709366184	PRPF40A	0.65196165	0.704029421
			VIRMA	1.414147608	1.268465686				NRIP1	1.398482811	1.385061069	PRPF40B	0.719543188	0.768689302
			VMA21	1.414266902	1.249539552				NRTN	2.191980331	1.782214049	PRPS1	0.576558353	0.651517694
			VOPP1	103.5	101				NSD2	1.301258891	1.760978197	PRPSAP2	0.636482917	0.660507357
			VPS13D	1.204998978	1.3212328				NSD3	1.226711865	1.321637427	PRR11	0.830083341	0.648973579
			VPS37D	1.626015885	1.808465608				NSMCE2	1.675036809	1.366527885	PRR12	0.669475341	0.821336974
			VPS4A	1.345263999	1.217874908				NSMF	1.624132161	2.003398637	PRR13	0.764606664	0.691712698
			VPS53	1.618102138	1.274997954				NSUN2	1.566703921	1.368659325	PRRC2B	0.639737991	0.530257328
			WASF1	1.569016413	1.413953762				NT5DC2	1.371582451	1.521265904	PRRT1	0.554648619	0.522745143
			WASHC2C	1.614564421	1.215308593				NTHL1	1.40166767	1.747357842	PSAT1	0.734765356	0.4808276
			WBP1	1.330582997	1.204349113				NTMT1	2.774656581	1.675273936	PSIP1	0.659024958	0.670020223
			WDR18	1.340722733	1.574473657				NUAK1	1.649312993	1.639176642	PSMA1	0.474976203	0.702208355
			WDR35	1.679277958	1.221206617				NUAK2	1.662779077	1.561538838	PSMC6	0.780933385	0.701678453
			WDR45	1.379244276	1.293621893				NUBP1	1.365305662	1.355597353	PSMD10	0.647411439	0.533613256
			WEE1	1.886214815	1.398258181				NUCB1	1.535587809	1.728271275	PSMD12	0.803147932	0.828593213
			WIPI1	1.230241691	1.288705393				NUDT14	2.344879077	1.678715557	PSMD7	0.831280145	0.804203218
			WNK2	1.273124606	1.650102546				NUDT22	1.456421107	1.733404748	PSPC1	0.585600823	0.482418554
			WNT7B	1.383899204	2.088901449				NUDT8	1.207491038	1.832902908	PSPH	0.694371775	0.652791372
			WRAP73	1.394262749	1.364401285				NUP210	1.245431106	1.533983218	PSRC1	0.669221189	0.706453282
			WRN	1.263183143	1.301028439				NUP58	1.249816711	1.266048134	PTBP1	0.637122803	0.594091074
			WWC3	1.548133385	1.315602441				NUP98	1.663480419	1.233817307	PTCD2	0.738805754	0.781531875
			XKR8	1.455112064	1.39102049				NXN	1.794364693	2.009902094	PTCD3	0.77769315	0.669745469
			XPA	1.265275477	1.218310946				NXPH4	1.794211947	1.282392998	PTEN	0.800203479	0.831099105
			YIF1A	1.427986116	1.631751842				NXT1	1.258252784	1.250762017	PTER	0.729787833	0.754468882
			YIF1B	1.227771838	1.357123767				ODF3B	2.308722017	1.821361973	PTGER4	0.544700687	0.735397065
			YKT6	1.606327426	1.497497345				OGFR	1.820271736	1.596817165	PTGES3	0.63900951	0.614183897
			YPEL2	1.349689144	1.871679111				OGFRL1	1.427524896	1.557175992	PTGR2	0.752260151	0.683713521
			YPEL5	1.371320732	1.312107769				OLFM1	1.815245103	1.419517855	PTH2	0	0
			YTHDF1	1.271489116	1.252917411				ONECUT3	1.690213959	1.860561254	PTMA	0.704633748	0.635135779
			YY1	1.351604206	1.248541827				OPLAH	1.301399575	1.222491966	PTMS	0.640507342	0.732677678
			ZBED6	1.203210815	1.292552587				OPN3	1.426138873	1.439515815	PTP4A1	0	0
			ZBTB12	1.426066354	1.263984911				OR51B5	1.625627428	2.126436074	PTPN1	0.805613498	0.68339735
			ZBTB14	1.28931771	1.387859716				ORAI1	1.23220625	1.548121176	PTPN4	0.709866521	0.777542162
			ZBTB39	1.400396893	1.232097897				ORAI2	1.431825652	1.863106232	PTPRA	0	0
			ZBTB4	1.207743547	1.412054927				OSBPL10	1.28095111	1.404066997	PTPRF	0.738592705	0.811214106
			ZBTB40	1.245614814	1.211507621				OSBPL2	2.297145591	1.592286562	PTTG1	0.609513284	0.56496272
			ZBTB42	1.63109694	1.551817082				OSBPL7	1.248084582	1.406687209	PUM1	0.797999511	0.681018426
			ZC3HAV1L	1.276208555	1.33969857				OSTC	1.404786879	1.349246617	PUM3	0.716681835	0.817217948
			ZDHHC1	1.85093641	1.379491782				OTUB2	2.005247648	2.028822107	PURB	0.652171321	0.728640418
			ZDHHC4	1.946449256	1.555035582				OTUD1	1.543526949	1.527541728	PYCR1	0.735904132	0.488069834
			ZDHHC8	1.265528823	1.567467498				OTULIN	1.241288069	1.362003878	PYROXD1	0.821268465	0.53056063
			ZFHX2	1.253644785	1.346713089				OXR1	1.225107261	1.259891373	QPCTL	0.638268928	0.652114631
			ZFP1	1.321653973	1.371965383				P2RX5	1.206063651	1.633920158	QRICH1	0.687479537	0.788046279
			ZFP37	1.255463984	1.224384206				P3H4	1.204126602	1.394161787	RAB11B	0.640829657	0.611077841
			ZFPM1	1.363713695	1.498408411				P4HB	1.50053653	1.441666075	RAB4B	0.7549749	0.713824862
			ZFYVE28	1.255227403	1.256219192				P4HTM	1.204546119	1.213808846	RAB5A	0.704921203	0.599312919
			ZGPAT	1.298803889	1.556987057				PA2G4	1.25113566	1.208283902	RAB6C	0.699359488	0.496153846
			ZIC5	1.316341852	1.36067532				PACS1	1.76395168	1.538874747	RAB8A	0.792446362	0.749607579
			ZNF138	1.273736247	1.292976322				PACS2	1.349320483	1.770263274	RABEP1	0.722063609	0.769772813
			ZNF174	1.298236772	1.242676224				PACSIN2	11.18225548	5.51995606	RACGAP1	0.594212063	0.59087064
			ZNF185	1.220456419	1.49153774				PAFAH1B1	1.493333031	1.316756448	RACK1	0.678584923	0.573632277
			ZNF232	1.48925251	2.39328689				PAK1	1.334479522	1.64768249	RAD21	0.551998803	0.646109266
			ZNF250	1.301755131	1.266881477				PANO1	1.525839814	1.646083029	RAD51C	0.696848805	0.705625629
			ZNF275	1.668221601	1.378739948				PAPLN	1.401728581	1.886358306	RAD52	0.726158235	0.828767625
			ZNF316	1.491871397	1.322361035				PAPSS1	1.442698687	1.46436472	RAD54B	0.621310006	0.762916906
			ZNF341	1.345681359	1.267689736				PAPSS2	1.386132207	1.318055823	RAD54L	0.603439337	0.728585316
			ZNF343	1.25334018	1.218277557				PAQR4	1.501998111	1.811364513	RAET1G	0.410711137	0.581533283
			ZNF358	1.459152093	1.450942787				PAQR7	1.204741754	1.460591733	RALY	0.708392216	0.730564526
			ZNF365	1.427618864	1.217081796				PAQR8	1.39832052	1.383256236	RAN	0.673841046	0.538803692
			ZNF436	1.352707775	1.223485585				PARD3	1.317978141	1.305881603	RANBP2	0.750987687	0.793788259
			ZNF445	1.260627462	1.322460138				PARD6A	1.846698492	1.301233682	RANBP3	0.74713315	0.776031846
			ZNF467	1.416910335	1.923548672				PARD6B	1.622882959	1.25929087	RANBP6	0.805812513	0.639050117
			ZNF500	1.641722895	1.458494193				PARP1	1.227197756	1.251527114	RAP1GDS1	0.799014123	0.687893877
			ZNF507	1.632040658	1.317497291				PARP12	1.434472579	1.499888068	RAPGEF6	0.806902189	0.763393865
			ZNF511	1.35632805	1.577955057				PARP2	1.420710245	1.23354173	RASGRP1	0.517153493	0.611819491
			ZNF517	1.274959309	1.410911476				PARP4	1.235321093	1.24683637	RASSF1	0.58677628	0.81397656
			ZNF518B	1.570061252	1.200879534				PARP6	1.397352382	1.366359766	RBBP4	0.748682424	0.642418305
			ZNF526	1.599691087	1.285839804				PARVA	1.373281886	1.368847184	RBBP7	0.772701158	0.745192417
			ZNF558	1.466594661	1.292690067				PATL1	1.454920259	1.341883739	RBM12	0.652926336	0.634991067
			ZNF576	1.569725297	1.382659824				PATZ1	1.306391043	1.522250078	RBM12B	0.591857829	0.444377619
			ZNF598	1.257708734	1.243258281				PBX3	1.66613251	1.729417049	RBM14	0.815637374	0.711523514
			ZNF599	1.456620742	1.220423293				PCDHAC1	1.776812409	2.187172717	RBM14-RBM4	0.815637374	0.711523514
			ZNF608	1.292892252	1.29770138				PCED1A	1.216859658	1.247678197	RBM22	0.818448203	0.758903891
			ZNF623	1.286040768	1.352241559				PCGF3	1.219250569	1.232520538	RBM26	0.725799258	0.785515877
			ZNF654	1.356042067	1.512100751				PCGF5	1.452431855	1.235151008	RBM39	0.724022213	0.611210092
			ZNF664	1.207836731	1.250163075				PCLO	1.439065488	1.508203774	RBM47	0	0
			ZNF692	1.21564418	1.256173679				PCNX1	1.281607589	1.322891431	RBM8A	0.643634729	0.533262408
			ZNF696	1.303704893	1.443023048				PCNX2	1.279044928	1.291818844	RBMXL1	0.761303594	0.708977728
			ZNF697	1.278738365	1.207264538				PCSK6	1.212098297	1.453857681	RBP1	0.676671887	0.61584647
			ZNF7	1.408504709	1.28197831				PCSK7	1.771376577	1.429605732	RBX1	0.788315363	0.714370756
			ZNF704	1.539314385	1.862311328				PCYOX1L	1.498165259	1.216047043	RCN1	0.683530738	0.596601694
			ZNF746	1.340574594	1.65385677				PDCD2	1.330543737	1.200846986	RCOR1	0.64502788	0.552620706
			ZNF778	1.39516899	1.339186246				PDF	1.541048359	1.250361188	REEP2	0.569721936	0.710993026
			ZNF865	1.586608848	1.263743429				PDGFA	2.132504928	2.644188423	REEP4	0.557882056	0.505459768
			ZSCAN20	1.547709962	1.309005412				PDGFB	2.939490795	2.865498274	REEP5	0.692666022	0.786280066
			ZSCAN21	1.437187161	1.475670075				PDGFC	1.393950925	1.590964655	REPS2	0.654273912	0.541768735
			ZSCAN32	1.29785991	1.233943037				PDIA5	1.398277931	1.739534469	REST	0.678684254	0.813098456
									PDK3	1.492455644	1.486735561	REV3L	0.786520729	0.822760075
									PDP2	1.471975987	1.625722641	REXO1	0.819891222	0.732269664
									PDZD7	1.418535949	1.795167467	RFC1	0.76314502	0.675652152
									PECR	1.495382158	1.516223792	RFC3	0.812918222	0.792161304
									PELI2	1.326958376	1.245080693	RFC5	0.787123934	0.700559153
									PELI3	1.499830629	2.287884411	RFESD	0.691386137	0.708911962
									PER3	1.62023049	1.947292588	RFWD3	0.570160097	0.455878649
									PES1	1.309759924	1.394406043	RFX5	0.502878399	0.423737873
									PET117	1.274696237	1.327590445	RGMB	0.55549605	0.211378597
									PEX10	1.536489382	1.786702753	RGS14	0	0
									PFKFB3	1.256917072	1.490779894	RGS2	0.642811797	0.69988829
									PFKFB4	1.409956879	1.583208333	RGS20	0.189594037	0.104504817
									PFKL	1.444957915	1.749403544	RGS4	0	0
									PGAP2	1.714392721	1.251436416	RHEB	0.736924221	0.73550079
									PGGHG	2.055036859	2.420523909	RHOB	0.792048305	0.764434749
									PGP	1.338674404	1.750264227	RHOV	0.642136945	0.719734557
									PGRMC2	1.319021637	1.225661722	RHPN2	0.793928059	0.747102758
									PGS1	1.345666202	1.318334508	RIF1	0.818439935	0.71989756
									PHF1	1.247063748	1.357037986	RILPL2	0.668676025	0.715532842
									PHF10	1.34071369	1.342823564	RINL	0.453964539	0.528390114
									PHF12	1.435052539	1.460366132	RIOX1	0.501980133	0.389449873
									PHF13	1.382080352	1.789547131	RIPK1	0.714581861	0.599012392
									PHF2	1.2574625	1.461374383	RLIM	0.478974727	0.528530458
									PHF20	1.503070187	1.387189524	RMI1	0.618771822	0.470710918
									PHF20L1	1.489528283	1.268533019	RMND5A	0.623833189	0.751431373
									PHF7	1.467620332	1.322431951	RNASEH2B	0.800928106	0.820919677
									PHLDA3	1.229022437	1.335487326	RNASEH2C	0.653820938	0.792401404
									PHLDB3	1.293787076	1.215675526	RND1	0.52121605	0.531303789
									PHOSPHO1	1.21359127	2.026330532	RNF103-CHMP3	0.626594385	0.703869439
									PHYKPL	1.492037727	1.330076675	RNF122	0.633183741	0.756511531
									PI4K2B	1.348128193	1.436061553	RNF139	0.659193673	0.570459526
									PIDD1	1.45762723	2.053387536	RNF144B	0.728894548	0.661956872
									PIGG	1.364478873	1.329747887	RNF168	0.805616858	0.769359776
									PIGQ	1.530061931	1.217801871	RNF220	0.679722097	0.814769118
									PIGS	1.38654683	1.230342966	RNF24	0.787746796	0.816577638
									PIGV	1.546830502	1.519319365	RNF26	0.826888444	0.730131416
									PIGX	1.352533178	1.483388199	RNF34	0.667669651	0.740985701
									PIK3AP1	1.36982222	1.374239104	RNF43	0.533068924	0.391611761
									PIK3CD	1.676779177	2.752662367	RNF5	0.796131826	0.733728861
									PIK3R1	1.261849691	1.455773382	RNPC3	0.781023248	0.784401146
									PIM3	1.422642196	1.420977487	RPA2	0.825460391	0.698425845
									PIP4K2A	1.403820713	1.358322727	RPL10	0.778133991	0.604022771
									PIP4P1	1.411401848	1.262586922	RPL13A	0.811998975	0.686705115
									PIP5K1C	2.608682133	1.601380902	RPL17	0.664383983	0.676622842
									PITPNM1	1.828566836	2.137753916	RPL18	0.794770715	0.829673573
									PITRM1	1.370597759	1.326543427	RPL22	0.718694902	0.728414252
									PITX1	1.24854551	1.531848714	RPL22L1	0.652557622	0.546243094
									PKD1	1.456391912	1.303582324	RPL23	0.57942195	0.520895305
									PKD1L2	1.296762083	1.293863085	RPL23A	0.778753336	0.645659442
									PKM	1.33979897	1.37132872	RPL24	0.806286961	0.6634576
									PKMYT1	1.752157548	1.992002358	RPL27A	0.818475166	0.67027547
									PKN3	1.208689753	1.467315094	RPL29	0.69700288	0.76381309
									PKNOX1	1.667195185	1.304234746	RPL31	0.562386585	0.494891792
									PKP3	548.7	218.4	RPL34	0.682506604	0.507123367
									PLA2G6	1.433903182	1.330047022	RPL35	0.753645452	0.729040208
									PLAGL2	1.336152577	1.551708043	RPL35A	0.703896438	0.595586762
									PLAU	2.032489617	1.928166659	RPL36	0.683292156	0.579100291
									PLCB3	1.637629597	1.842295468	RPL36AL	0.683600145	0.821547937
									PLCD1	1.646845969	1.305901724	RPL37	0.723292638	0.581863454
									PLCD3	1.59384507	1.743633522	RPL37A	0.565170177	0.478265973
									PLCE1	1.52935719	1.523587806	RPL38	0.674192928	0.521957707
									PLCG1	1.252376017	1.551694626	RPL6	0.703010469	0.656639425
									PLD1	1.625798611	1.677448675	RPL8	0.825428558	0.721671424
									PLD2	1.771597949	1.778281314	RPL9	0.677391967	0.588238914
									PLEKHA1	1.588544461	1.749395377	RPP14	0.733544142	0.72935364
									PLEKHA5	1.367966081	1.22264631	RPP25	0.457347216	0.549758097
									PLEKHA7	1.255948512	1.412976706	RPP25L	0.801818593	0.759150513
									PLEKHF1	1.241821045	1.438036324	RPRD2	0.691751394	0.647253558
									PLEKHG1	1.488347783	1.212463048	RPS10	0.714073478	0.527979446
									PLEKHG2	1.551329528	1.439579408	RPS10-NUDT3	0.714073478	0.527979446
									PLEKHG4	1.488640269	1.862460082	RPS11	0.539503386	0.547668924
									PLEKHM2	1.620125151	1.27030448	RPS13	0.823045042	0.775088174
									PLEKHN1	1.309963268	1.549230034	RPS15	0.592872445	0.627031211
									PLIN3	1.764636845	1.337766728	RPS16	0.577275888	0.556652007
									PLK3	1.288294326	1.257007164	RPS17	0.690709253	0.714448693
									PLLP	1.771594637	1.412969706	RPS2	0.643443282	0.576552953
									PLOD1	1.342637375	1.356199998	RPS20	0.773195389	0.685989311
									PLP2	1.325153136	1.494678488	RPS23	0.747361261	0.60697252
									PLPP2	1.367242555	1.65518422	RPS24	0.737771811	0.690341885
									PLPP6	1.58142048	1.346153584	RPS25	0.635805742	0.578618691
									PLPPR2	1.384272773	1.281433807	RPS26	0.831469036	0.721798363
									PLXNA1	1.315740485	1.781944645	RPS27A	0.728963065	0.751681022
									PLXNB2	1.290824892	1.544891905	RPS3	0.73545622	0.606540901
									PLXND1	1.789256365	2.901287726	RPS4X	0.736687688	0.717984789
									PM20D2	1.290979426	1.365897152	RPS5	0.76027795	0.71946982
									PML	1.279933167	1.357677693	RPS6	0.733942952	0.477466667
									PMP22	1.221919203	2.027229418	RPS6KA5	0.548183079	0.672798037
									PNN	1.240436455	1.299838716	RPS6KC1	0.450287105	0.417030295
									PNPLA6	1.256102601	1.874728901	RPS7	0.784642776	0.73840341
									POFUT1	1.331483643	1.555165266	RPS8	0.807197668	0.745413136
									POFUT2	1.501879599	1.252403358	RPSAP58	0	0
									POGK	1.289359653	1.293556855	RPTOR	0.743238147	0.714372502
									POLDIP2	1.468337371	1.346891084	RRM2	0.715834373	0.737618085
									POLH	2.050234537	1.271431141	RRN3	0.578792002	0.555949295
									POLR2C	1.557606902	1.433322526	RRP15	0.691653488	0.705201003
									POLR2E	1.395633893	1.271708393	RSF1	0.659642408	0.752488824
									POLR2F	1.222274552	1.282522396	RSL24D1	0.732693131	0.670715962
									POLR2H	1.350147715	1.919059282	RTEL1	0.746137857	0.669874079
									POLR2L	1.275793954	1.428027376	RTKN2	0.707793471	0.782188534
									POM121	1.396528116	1.559118569	RTL5	0.533207158	0.667044868
									POMT1	1.357689217	1.292969871	RTL8A	0.768465489	0.774691144
									POP7	1.348496027	1.29423717	RTL8C	0.617549445	0.759939922
									POPDC3	1.444301809	1.645146733	RTN2	0.495034968	0.46330505
									PPARA	1.722452396	3.137460379	RTN3	0.749511318	0.745573587
									PPDPF	1.528586587	1.739943099	RTN4	0.792097433	0.666134943
									PPFIA1	1.629422627	1.437869398	RTN4RL2	0.798708122	0.831454379
									PPFIA3	1.397921278	1.300596125	RUFY2	0.721724382	0.77697181
									PPIL6	1.242314302	1.327199524	RWDD2B	0.804108263	0.804084081
									PPM1F	1.917856211	1.523033148	S100A14	0.80994066	0.484804287
									PPM1G	1.469911684	1.316769898	S100A3	0.598691589	0.788156215
									PPM1H	1.325283655	1.392359401	S100PBP	0.712428178	0.752824649
									PPP1R13B	1.362632926	1.697449803	SAFB	0.756042174	0.814160548
									PPP1R16A	1.666773106	1.446470313	SAFB2	0.747554458	0.81637359
									PPP1R26	1.409176875	1.338062097	SAMD13	0.425874685	0.630551867
									PPP1R35	1.359666678	1.568080631	SAMD4B	0.734813054	0.804713234
									PPP1R3B	1.310211079	1.320320893	SAMD8	0.776553816	0.712700751
									PPP1R3E	1.607370324	2.060149257	SAP18	0.694413462	0.815226051
									PPP1R9A	1.278289208	1.230751898	SAP30	0.301005747	0.475165665
									PPP2R1A	102.8	2.156630471	SAR1A	0.762247439	0.772183911
									PPP2R2D	2.079994312	1.344050762	SARAF	0.793107002	0.739565863
									PPP2R5B	1.399827397	1.500376131	SASH1	0.574237435	0.657259317
									PPP2R5C	1.815255858	1.759765151	SAV1	0.788557396	0.825626617
									PPP3R1	1.344037037	1.249240229	SCAF1	0.813862388	0.76366772
									PPP5C	1.212440079	1.251357139	SCAF11	0.790289591	0.736223673
									PPP5D1	1.474618682	1.45878868	SCAF8	0.77773296	0.781270829
									PPP6R2	1.627123955	1.464171941	SCAND1	0.754690262	0.782500739
									PPTC7	1.302571296	1.444289903	SCOC	0	0
									PRDM10	1.309516862	1.237072451	SDCBP	0.773752066	0.831205275
									PRDM16	1.386264955	1.212910557	SDE2	0.700307738	0.784013506
									PRDX5	1.211659733	1.288981554	SEC23A	0.817950391	0.799053623
									PREB	1.479222639	1.381893643	SEC62	0.805886397	0.828323372
									PRELID2	1.311575235	1.399681777	SEC63	0.781318106	0.722331587
									PRELID3A	1.222973014	1.560759169	SECISBP2	0.792053368	0.691007801
									PRF1	2.862771285	1.233356857	SELENOF	0.757611894	0.774034774
									PRICKLE3	1.272959106	1.355237074	SELENOP	0.400899046	0.157013276
									PRICKLE4	1.672168791	1.496802094	SELL	0.664931846	0.682117085
									PRKAA2	2.996743241	2.194744531	SEMA3G	0.647028058	0.717492665
									PRKACA	102.8	2.750410509	SEMA6C	0.64351195	0.692840791
									PRKAG2	1.325008278	1.409920215	SENP2	0.742060834	0.764059027
									PRKCD	1.754977377	1.783017674	SENP6	0.723836856	0.805084772
									PRKCG	1.368106912	1.737583552	SEPHS1	0.662471271	0.576335505
									PRKCI	1.577608614	1.389393121	SEPHS2	0.570438237	0.468304643
									PRKCZ	1.615559369	1.774558501	SEPSECS	0.672427802	0.688051906
									PRMT2	1.368549684	1.406452331	SERINC1	0.669151875	0.570487194
									PRR14	1.204636974	1.400050868	SERPINH1	0.690412924	0.763997101
									PRR5-ARHGAP8	1.392391482	2.044438663	SERPINI1	0.396675725	0.471955472
									PRRX2	1.374930137	1.515851567	SERTAD1	0.745985282	0.689360313
									PRSS12	1.673324507	1.737797535	SERTAD3	0.716222458	0.761467041
									PRSS22	1.56289571	1.48956289	SESN2	0.641375425	0.429945182
									PRUNE1	1.533643378	1.432767841	SESN3	0.210992051	0.350747841
									PSEN2	1.742141567	1.600778679	SETD5	0.761851745	0.607113448
									PSMA7	1.251678531	1.298287968	SETDB1	0.669062891	0.658575653
									PSMB2	1.204052848	1.590308095	SETMAR	0.736514361	0.819547332
									PSMC3	1.27849443	1.26750936	SF1	0.738099888	0.766089448
									PSMD13	1.433046769	1.426949092	SF3A3	0.722550513	0.742419316
									PSMD6	1.445116491	1.222593997	SF3B3	0.789098005	0.792010671
									PSME1	1.763691418	1.671079715	SF3B4	0.731074795	0.652230267
									PSMG3	1.469146305	1.957653171	SFPQ	0.719517562	0.664398931
									PSMG4	1.269847102	1.420861746	SFT2D3	0.741843575	0.774242194
									PTBP2	1.376518846	1.282636714	SGK1	0	0
									PTCD1	1.204639057	1.308932567	SGO1	0.690034914	0.742903779
									PTDSS2	1.33357445	1.441888978	SGPL1	0.711303772	0.433440749
									PTGFRN	1.314540594	1.64304922	SGPP2	0.707793123	0.344611092
									PTK6	2.076158235	2.498015459	SH3BGRL	0.786857851	0.770024154
									PTMA	1.350781557	1.446454842	SH3BP5L	0.463988375	0.43350967
									PTP4A2	2.177080871	1.310264334	SH3D19	0.829980998	0.673671007
									PTP4A3	1.37390255	1.675300068	SH3PXD2A	0	0
									PTPDC1	1.669230086	1.607135093	SHKBP1	0.628403058	0.739013084
									PTPN1	1.262597746	1.253181186	SHMT2	0.809684564	0.433641491
									PTPN18	1.802728419	1.562434289	SHROOM3	0	0
									PTPN2	1.457711944	1.493467408	SIAH1	0.655163396	0.376226607
									PTPN6	102.8	218.4	SIAH2	0.83178903	0.715718594
									PTPRF	1.268383628	1.381890168	SIKE1	0.757872489	0.806894588
									PTPRH	2.22152172	1.662973613	SINHCAF	0.650957191	0.590392304
									PTPRJ	1.714450841	1.448301756	SIRT5	0.757646827	0.737472374
									PTPRU	1.86777346	1.267578054	SIX3	0.674456913	0.283672347
									PUDP	1.544552856	1.435559689	SIX5	0.61863014	0.633165507
									PUF60	1.227352028	1.202120407	SKA2	0.792247402	0.599522609
									PWWP2B	1.751928847	2.014295964	SKA3	0.719742031	0.746087318
									PXDC1	1.703561257	1.539074919	SLC11A2	0.346700119	0.505016176
									PXMP4	1.283648827	1.358062687	SLC16A1	0.699310319	0.734722145
									PXN	1.585057312	1.426234732	SLC16A6	0.8035366	0.681474566
									PXYLP1	1.592955066	1.442351803	SLC16A7	0.740132357	0.6547158
									PYCR2	1.9225035	1.54530211	SLC1A4	0.630224544	0.316915634
									QKI	1.905730399	1.383779111	SLC20A2	0.497204272	0.25231148
									QSER1	1.309208081	1.429332806	SLC22A17	0.511471068	0.813672266
									RAB11FIP3	1.492671184	1.362923343	SLC25A16	0.697427397	0.775943173
									RAB12	1.437621089	1.444855192	SLC25A21	0.610191208	0.657860437
									RAB15	1.204880389	1.466434443	SLC25A28	0.806354134	0.75846661
									RAB22A	1.450117937	1.323328625	SLC25A30	0.732953764	0.823039119
									RAB26	2.097990815	2.420999716	SLC25A33	0.596096279	0.737602968
									RAB28	1.294969807	1.319757506	SLC25A40	0.759052854	0.829599065
									RAB2A	1.311505326	1.57078363	SLC25A44	0.653863149	0.773416874
									RAB36	1.208940079	1.327223998	SLC26A4	0	0
									RAB3A	1.65508655	2.478535516	SLC2A1	0.810186209	0.800181552
									RAB3B	1.263549795	1.25623162	SLC2A11	0.82436985	0.815862027
									RAB3IL1	1.524802284	1.851163402	SLC2A12	0.519096348	0.537249042
									RAB3IP	1.601547248	1.258706916	SLC2A3	0	0
									RAB40B	1.976448821	2.111060302	SLC33A1	0.753007407	0.518742959
									RAB43	1.234443287	1.377523533	SLC35F2	0.651872097	0.718218526
									RAB4A	1.659320555	1.402933853	SLC35G2	0.575970843	0.634383112
									RAB6A	1.529240344	1.201482304	SLC36A4	0.7735612	0.628606083
									RAB6B	1.809591306	1.669750603	SLC37A1	0	0
									RABIF	1.412926937	1.275134178	SLC38A2	0.688401751	0.515034767
									RABL2A	1.307626297	1.206591924	SLC38A5	0	0
									RABL6	1.230583006	1.347638418	SLC38A9	0.783681253	0.793049114
									RAC2	1.467943865	2.826637519	SLC39A10	0.666527403	0.481328741
									RAC3	1.664229129	2.451870514	SLC39A4	0.437824856	0.343748378
									RAD23B	1.538687036	1.586309767	SLC39A9	0.787089866	0.777039639
									RAD9A	1.259284297	1.683223911	SLC3A2	0.726223868	0.597655974
									RADIL	1.442663784	1.754543454	SLC43A1	0.285884313	0.550394241
									RAI1	1.336639753	1.64370278	SLC43A3	0.57143056	0.593468484
									RALB	1.350714099	1.503070817	SLC4A7	0.564713199	0.607813307
									RALGAPA1	1.21953394	1.326697857	SLC6A8	0.55968444	0.360450638
									RALGDS	1.304108756	1.529282332	SLC7A1	0.626401914	0.339965798
									RALGPS1	1.416794524	1.714196789	SLC7A11	0.450302247	0.164231859
									RAN	1.207504764	1.202900907	SLC8A2	0	0
									RANBP9	1.213836539	1.238446088	SLFN13	0	0
									RAP1GAP	1.542238699	1.717765918	SLMAP	0.816470533	0.728886539
									RAPGEF2	1.233793403	1.285792861	SLX1A	0.635093064	0.621024483
									RASA2	1.237585358	1.294284793	SLX1B	0.634663887	0.607336328
									RASA3	1.659746376	2.012926293	SLX4IP	0.703941638	0.537417571
									RASA4	1.556117516	2.789042553	SMAD1	0.784242576	0.694919942
									RASA4B	1.688401416	2.913395265	SMARCA1	0.566533887	0.74477061
									RASAL1	1.392305069	1.352144573	SMARCC1	0.777652767	0.675861345
									RASGEF1A	1.85772456	2.28913937	SMARCE1	0.758838037	0.828953435
									RASSF1	1.327883603	1.687751369	SMC1A	0.735658249	0.783746514
									RASSF4	1.248547549	1.653701572	SMC4	0.561946879	0.558091742
									RASSF5	1.24725122	1.584491076	SMC5	0.685324299	0.755549749
									RASSF7	1.445057218	1.918071874	SMDT1	0.712859221	0.82586941
									RASSF8	1.813808485	2.020830997	SMG1	0.701164467	0.825442302
									RAVER1	1.229579874	1.244140529	SMG9	0.678718508	0.62965518
									RBAK	1.295548736	1.240719868	SMIM14	0	0
									RBAK-RBAKDN	1.295548736	1.240719868	SMIM15	0.793136232	0.813480977
									RBFOX2	1.28344842	1.447925569	SMIM19	0.809690167	0.764974759
									RBKS	1.450856274	1.227730326	SMPDL3B	0.461573884	0.460252728
									RBM15B	1.23687593	1.204780088	SMS	0.567777386	0.699739725
									RBM17	1.377464114	1.442331497	SMTN	0.648587794	0.624553531
									RBM5	1.311208355	1.200822124	SMU1	0.69587171	0.501092312
									RBM6	1.299654415	1.449241966	SMURF2	0.817404246	0.702458826
									RCAN3	1.492087308	1.602380124	SNAI1	0.763046315	0.735396123
									RCBTB2	1.61595789	1.322433571	SNCG	0	0
									RCC2	1.238565518	1.314574033	SNF8	0.74575938	0.755702549
									RDH11	1.303810909	1.240434015	SNIP1	0.742377829	0.718474537
									RDX	1.222804174	1.310292636	SNRNP25	0.687873786	0.739344678
									REEP3	1.286833064	1.406448018	SNRNP40	0.687784957	0.750362994
									RELA	1.384011055	1.439013475	SNRNP70	0.686037011	0.731910003
									RELB	1.567795191	1.857312413	SNRPA	0.635061642	0.590042465
									RELL2	1.252616806	1.627886626	SNRPB	0.647601071	0.7179056
									REPS2	1.551772663	1.419887017	SNRPD1	0.730229127	0.753786983
									RER1	1.354447515	1.328123333	SNRPD2	0.662848509	0.60010174
									RET	1.342855756	1.801366286	SNRPE	0.62578063	0.515324809
									REXO4	2.046714377	1.77041356	SNRPF	0.785847445	0.679487831
									RFNG	1.566694161	1.579185978	SNRPG	0.70687424	0.613045094
									RFX1	1.686846361	1.612193777	SNTB1	0.730443686	0.708336
									RFX2	1.39499308	1.355497859	SNU13	0.733954522	0.803517898
									RFX3	1.23324066	1.33069944	SNX12	0.726692932	0.802988957
									RGCC	1.534328038	1.719150016	SNX25	0.683266055	0.56036181
									RGL3	1.526761039	1.220738447	SOAT1	0.714663603	0.602159692
									RGPD5	102.8	65.5	SOX12	0.77191838	0.649508817
									RGS10	1.373722721	1.933626923	SOX4	0.803080144	0.676642085
									RGS19	1.60137712	1.81651817	SP1	0.506278373	0.377226332
									RHBDF1	2.755243864	2.88209832	SP2	0.730961634	0.760392346
									RHBDF2	1.479971234	1.571782655	SP3	0.703171327	0.75145073
									RHBDL3	1.696812671	1.703851892	SP4	0.749446024	0.824996114
									RHOA	1.385304059	1.276683351	SPATA20	0.801591858	0.809270149
									RHOC	1.949950953	1.806979543	SPATA24	0.782292558	0.736465548
									RHOD	2.138554187	2.023470447	SPATS2	0.669667525	0.75615048
									RHOF	1.671779599	1.470011576	SPATS2L	0.77467134	0.702421828
									RHOG	1.454903682	1.743995055	SPC24	0.546372819	0.717799127
									RHOT1	1.424874477	1.30839918	SPC25	0.543317534	0.448314375
									RHOT2	1.454855685	1.476848619	SPDL1	0.700058323	0.728041651
									RIBC2	1.276470511	1.606615863	SPEG	0.41749522	0.147026499
									RIC1	1.443667843	1.346736853	SPHK2	0.772519957	0.791698032
									RILP	1.307874887	1.590870887	SPICE1	0.558185638	0.501391418
									RILPL1	1.258958533	1.614898204	SPIDR	0.469297318	0.497328689
									RIMBP3B	1.201163929	1.562148182	SPIN4	0.702143931	0.751185312
									RIMBP3C	1.569412662	284	SPOCD1	0.530935252	0.556773677
									RIMKLA	1.8237662	2.124779697	SPOCK3	0.226238	0.579039509
									RIN1	1.423972032	2.066812175	SPRED2	0.760413799	0.62087517
									RIPOR1	1.368206583	1.511077091	SPRY4	0.601395159	0.444909056
									RITA1	1.200095459	1.378622675	SPRYD3	0.643612908	0.732994442
									RMND5B	1.275288613	1.223826151	SPTSSA	0.762124222	0.697990559
									RNASEH2B	1.207312392	1.238784904	SQLE	0.528350746	0.722981069
									RNASET2	1.370027279	2.089053441	SREBF1	0.719428786	0.547880807
									RND3	1.314341166	1.323915156	SRGAP2	0.663897399	0.429033965
									RNF10	1.596816756	1.331940722	SRGAP2B	0.780048707	0.488243693
									RNF11	1.440434803	1.45079115	SRGAP2C	0.65566116	0.662354785
									RNF126	1.464803926	1.378887901	SRMS	0.33906529	0.625997241
									RNF130	1.342561812	1.598581311	SRPRA	0.659116631	0.77329258
									RNF141	1.319361448	1.41318404	SRRM1	0.750089122	0.770872915
									RNF144A	1.361604254	1.582321328	SRRM2	0.685415134	0.628723614
									RNF149	1.329433451	1.562693855	SRRT	0.722843259	0.762463659
									RNF166	1.506919531	1.659982956	SRSF10	0.727932227	0.68810976
									RNF167	1.29825983	1.272055146	SRSF4	0.797063081	0.803558903
									RNF170	1.351623596	1.25624978	SRSF5	0.617725855	0.605156292
									RNF182	2.364784155	2.427293798	SRSF8	0.681647982	0.716717229
									RNF187	1.502201825	1.686492245	SSB	0.744890221	0.797299725
									RNF19B	1.247916306	1.413957744	ST6GAL1	0.65225821	0.666040744
									RNF207	1.330796109	1.37161809	ST7	0.146237119	0
									RNF208	1.301841994	1.582297059	STAC3	0.388954869	0.360263315
									RNF213	1.783329228	1.799002382	STAG1	0.679476155	0.689769728
									RNF214	1.651943969	1.440609019	STAG2	0.64546301	0.624034509
									RNF215	1.428097521	1.80128054	STAG3	0.623950825	0.707949042
									RNF216	1.408363202	1.445555022	STAM	0.815829489	0.616087224
									RNF217	1.220279308	1.348740801	STAMBPL1	0.630504688	0.784333876
									RNPEPL1	1.410504188	1.317023933	STARD8	0.690012287	0.816350118
									ROGDI	1.283643262	1.687980555	STAT6	0.782826967	0.786768546
									ROR1	1.303211015	1.648994664	STC2	0.803656703	0.456232971
									RPL26L1	1.311906969	1.307201436	STIL	0.618709515	0.708875072
									RPLP2	1.201978819	1.543213573	STK11	0.694040261	0.823000469
									RPP25L	1.368374046	1.228017837	STK17B	0.727301673	0.788947051
									RPS19	1.261851324	1.217409152	STK33	0.478056359	0.667409521
									RPS21	1.264160385	1.645035399	STK38L	0.805719104	0.776593382
									RPS6KA1	1.781681715	1.588887666	STMN1	0.439381706	0.558423681
									RPS6KA3	1.864388975	1.315683085	STON1	0	0
									RPS6KA4	1.594212606	2.089242434	STOX2	0	0
									RPS6KB2	1.319964647	1.404250341	STPG1	0.757727148	0.792463578
									RPS6KL1	1.501569746	2.131948791	STRAP	0.700805939	0.746201145
									RPUSD1	1.364431698	1.732889354	STT3A	0.697717044	0.803197308
									RPUSD4	1.223982774	1.201720464	STX16	0.830748533	0.829816447
									RRAGC	1.659343076	1.351488976	STX5	0.68955065	0.817514078
									RRAGD	1.223141915	1.865826052	STXBP3	0.718274335	0.749071034
									RRBP1	1.252214678	1.311794749	STYK1	0.805339883	0.761364527
									RRNAD1	1.21041532	1.202126266	SUB1	0.655403256	0.624897925
									RRP1B	1.292789598	1.361079279	SUCO	0.829046343	0.641467432
									RSAD1	1.474226804	1.757552991	SUGT1	0.805143426	0.735343715
									RSPH1	1.445376951	1.3691	SULT1C2	0.333203229	0.307526079
									RSPH3	1.298494983	1.345145754	SULT2B1	0.37581262	0.208846487
									RTBDN	2.441626077	1.757664234	SUMF1	0.781177169	0.764426108
									RTEL1	1.293754906	1.261551971	SUMO1	0.555926789	0.706217182
									RTF1	1.212098583	1.210698838	SUMO2	0.716046288	0.56504373
									RTKN	1.303226589	1.403845284	SUMO3	0.52847691	0.60885285
									RTN4R	1.446253349	1.623526237	SUN1	0.689953894	0.678144737
									RTN4RL1	1.617407783	1.553900984	SUPT20H	0.635986618	0.82361484
									RUFY1	1.282568292	1.369316002	SUZ12	0.688528472	0.764261872
									RUVBL2	1.282281504	1.448653878	SWAP70	0.585107716	0.622758899
									RWDD4	1.311956294	1.320644332	SWSAP1	0.723843639	0.75462738
									RXRA	3.794387082	4.413869877	SYAP1	0.644699899	0.636498579
									RYBP	2.15737359	1.837687798	SYDE1	0.570592684	0.833275006
									S100A14	1.315171241	1.219291916	SYF2	0.732698413	0.620551145
									S100A2	1.60558435	12.61328976	SYMPK	0.821339816	0.764122332
									S100A4	2.185709883	3.271926181	SYNCRIP	0.718791546	0.507859603
									S100A5	7.066267363	3.435716477	SYT1	0.53079034	0.459352385
									S100A6	1.470068576	1.41625149	SYT11	0.644929776	0.291867099
									S1PR5	1.241990912	1.583610562	SZRD1	0.689036071	0.626310383
									SAAL1	1.334842334	1.235499642	TADA2A	0.628992453	0.594795793
									SAC3D1	1.202683402	1.525721567	TAF1	0.686698438	0.733763116
									SAMD1	1.470280345	1.32666917	TAF10	0.638219867	0.729515345
									SAMD10	1.766842262	1.390906045	TAF11	0.711943234	0.635445697
									SAMD11	1.74441935	2.4685036	TAF1B	0.675215464	0.69402274
									SAMD12	1.720914656	1.220778377	TAF5	0.810395292	0.758289302
									SAMD5	1.307050777	1.396956714	TAF7	0.717183361	0.679492851
									SAP130	1.337424289	1.244401488	TAGLN2	0	0.659679408
									SAPCD2	1.271424781	1.494322521	TANGO6	0.727546542	0.769402847
									SARDH	1.332346069	1.229150101	TANK	0.60366586	0.449452041
									SAT2	1.490704632	1.637526599	TARS2	0.609701847	0.676277311
									SATB1	2.898042529	2.192767528	TBC1D19	0.534953414	0.343720466
									SBF1	1.910275638	1.607523523	TBCE	0.689085472	0.763456426
									SBF2	1.290949154	1.268946377	TBCEL	0.808736669	0.683028856
									SCAF4	1.263623471	1.260689754	TBRG4	0.807543792	0.654380486
									SCAP	1.288749017	1.301626744	TBX3	0.701529858	0.806250366
									SCAPER	1.892549684	1.450119436	TCEAL9	0.799036707	0.712839524
									SCARB1	1.200418784	1.582450752	TCERG1	0.797759924	0.623804234
									SCARB2	1.333570891	1.518353485	TCF12	0.620800788	0.732750791
									SCD	1.379029906	1.712989072	TCF7L2	0.586657287	0.544937659
									SCN1B	1.642438897	3.09393992	TCOF1	0.574204965	0.791330284
									SCNN1A	1.448401006	1.360686211	TEAD2	0.676135164	0.692582951
									SCUBE1	2.400523401	2.632936107	TEN1	0.635898622	0.729725298
									SCYL1	1.754753854	1.850912492	TERF1	0.737396856	0.745562705
									SCYL3	1.401222592	1.303598146	TERT	0.377441322	0.550836417
									SDC1	1.248811903	1.908395318	TES	0.80129871	0.676676853
									SDC3	1.360217448	1.360423209	TESK2	0.591814738	0.812911888
									SDF2L1	1.243019949	2.240269958	TEX10	0.630700005	0.604425518
									SDF4	1.223359964	1.509646563	TEX45	0.389701945	0.661538462
									SDHAF1	1.373619396	1.472933721	TEX9	0.731766416	0.829219185
									SDHB	1.364711528	1.487754062	TFCP2	0.765496895	0.76009618
									SEC61A2	1.417366339	1.446918491	TFG	0.627587687	0.777859157
									SEC61B	1.441730348	1.383272383	TFPI	0.739546049	0.411057978
									SECTM1	1.682938821	3.843557874	TGFB1I1	0.47636924	0.557631846
									SEH1L	1.341620358	1.427038103	TGIF1	0.644602683	0.532641723
									SEL1L3	1.258066721	1.23034529	TGIF2	0.822213373	0.820898807
									SELENON	1.585893848	1.675643664	THAP7	0.795323349	0.76175664
									SELENOO	1.492282602	1.387207476	THAP9	0.60104621	0.549023036
									SELENOS	1.371651179	1.4835917	THEM4	0.774461474	0.734455522
									SEMA3B	2.457124249	2.161866452	THNSL1	0.72976694	0.752298794
									SEMA3D	1.423059142	1.485555799	THOC2	0.694122844	0.667579353
									SEMA4B	1.278236846	1.32902222	THUMPD3	0.701508918	0.650029272
									SEMA4C	1.706836323	1.340366165	TICRR	0.609451601	0.66216741
									SEMA4F	1.703103253	1.581587371	TIFA	0.632788306	0.742367556
									SEMA6A	1.200758386	1.30576843	TIGD1	0.734957092	0.74863586
									SEMA7A	1.282188681	1.443519407	TIGD2	0.628339269	0.770691566
									SENP3	1.327174456	1.764783233	TIMELESS	0.713678943	0.833029099
									SERINC2	1.481216011	1.856357214	TIMM10	0.737373827	0.794028603
									SERINC5	1.390423675	1.291689835	TIMM17B	0.527540528	0.591656657
									SERPINA1	1.416767922	2.244554048	TIMM23	0.756972431	0.708060207
									SERPINE2	1.407775905	1.463172611	TIMM44	0.656746039	0.662713465
									SESN1	1.534759244	1.605350806	TIMP1	0.730176472	0.786525787
									SESTD1	1.250478751	1.506421006	TIMP2	0.651122326	0.777626723
									SETD1A	1.358763505	1.386951791	TIMP3	0.177053775	0.349268813
									SETDB2	1.220226614	1.225697196	TIPARP	0.65318152	0.602181844
									SETDB2-PHF11	1.220226614	1.225697196	TIPIN	0.570581639	0.730763669
									SEZ6L2	1.338482692	1.406703625	TK1	0.698542277	0.757261707
									SF3B2	1.390322257	1.225000102	TLR1	0.341878669	0
									SFMBT1	1.429082259	1.701208055	TM2D2	0.712873312	0.701474198
									SFSWAP	1.26781366	1.28280906	TM9SF4	0.822137128	0.689379341
									SFT2D2	1.212506698	1.214409214	TMA16	0.693568512	0.663126233
									SFXN1	1.279724678	1.573056382	TMA7	0.654723208	0.718883896
									SFXN3	1.417935159	1.810249668	TMBIM6	0.621595208	0.513675677
									SFXN5	1.319623239	1.353928664	TMCC1	0.828389453	0.832426696
									SGSM1	1.484388847	1.427359811	TMCO1	0.699680566	0.658679656
									SGTA	1.69811	1.504115119	TMED1	0.766356387	0.783753196
									SH2B1	1.444316943	1.431007368	TMEM101	0.675111119	0.78047501
									SH2B2	1.757489989	1.596510199	TMEM109	0.748414461	0.787339439
									SH2D3A	1.329092833	1.445633497	TMEM116	0.625771466	0.555978934
									SH3BGRL3	1.295422212	1.271631266	TMEM123	0.793390794	0.783276723
									SH3BP1	1.53971472	1.766639774	TMEM126A	0.762216508	0.825602456
									SH3BP2	1.422694261	1.813086654	TMEM143	0.653847191	0.828513269
									SH3BP4	1.836307753	7.093711467	TMEM144	0.611772761	0.659789454
									SH3GL1	1.445559253	1.429030022	TMEM18	0.73215248	0.794406553
									SH3GLB2	1.236932362	1.288013969	TMEM187	0.622162431	0.788254399
									SH3RF1	1.22505377	1.232034138	TMEM200A	0.117021775	0.259300556
									SH3RF2	1.673123099	1.810849607	TMEM209	0.791144218	0.637298026
									SH3TC1	1.711911976	2.361805519	TMEM218	0.616171274	0.804149216
									SHANK2	1.305978054	1.799432982	TMEM258	0.614395759	0.729524852
									SHARPIN	1.455699015	1.482682556	TMEM41B	0.782717593	0.697538579
									SHB	1.358603628	1.355444764	TMEM43	0.689657762	0.804694935
									SHISA4	1.704544703	1.468706568	TMEM53	0.62240744	0.737371198
									SHISA8	1.259747023	1.51864229	TMEM69	0.824072808	0.796453147
									SHOX2	1.313771638	1.286308889	TMEM94	0.53437016	0.553226364
									SHROOM1	1.280332621	1.312698012	TMEM97	0.606435633	0.754776715
									SHROOM2	2.273780427	1.951345787	TMPO	0.787779286	0.598227928
									SHROOM3	102.8	87.3	TMSB10	0.755492547	0.726436459
									SIK3	1.281791639	1.208685101	TMSB15B	0.356204353	0.614503013
									SIL1	1.297370722	1.286121326	TMUB2	0.68034568	0.753792124
									SIM2	1.342824427	1.424804938	TNFRSF10B	0.804506152	0.505516134
									SIPA1L3	1.347298113	1.339549245	TNFRSF10D	0.640153368	0.763544506
									SIRPA	1.257709403	1.354258787	TNFRSF12A	0.822362675	0.787161875
									SIRT3	1.423581021	1.432091271	TNFSF9	0.385397698	0.395033589
									SIRT5	1.42964724	1.404952415	TNIK	0.646806026	0.65493385
									SIRT7	1.22821426	1.418151237	TNKS1BP1	0.547772738	0.352366854
									SKAP1	3.272651182	2.803214794	TNPO2	0.67618235	0.743503054
									SKI	1.584061025	1.273211217	TNRC6B	0.67483787	0.513289995
									SKP2	1.300174402	1.419979646	TOB1	0.800660868	0.718657566
									SLBP	1.316705434	1.381277565	TOE1	0.603704822	0.661273374
									SLC12A8	1.377123443	1.828430129	TOGARAM1	0.632617559	0.668148211
									SLC15A1	3875.7	3561.2	TOM1L2	0.737433274	0.610255201
									SLC16A13	1.40408117	1.267275978	TOMM20	0.755330637	0.73955908
									SLC16A5	1.697164728	1.397710877	TOMM6	0.72507227	0.718180549
									SLC17A5	1.557130471	1.213848235	TOMM7	0.797722604	0.773258683
									SLC22A18	1.993491996	1.629289174	TOP1	0.72513372	0.680575141
									SLC22A18AS	1.849447039	1.616137476	TOPORS	0.813763326	0.702570657
									SLC22A23	1.374163659	1.556986803	TOR1AIP2	0.74559352	0.787320326
									SLC22A5	1.265151546	1.292544126	TP53	0.660862058	0.473733142
									SLC25A1	1.28569991	1.633201465	TP53BP2	0.682506604	0.696058212
									SLC25A11	1.313432178	1.272620903	TPD52L2	0.655817667	0.756596725
									SLC25A15	1.323450024	1.28942534	TPP1	0.744674114	0.820471919
									SLC25A19	1.258089338	1.293092557	TPRKB	0.68889976	0.811305063
									SLC25A22	1.369129779	2.070572307	TPX2	0.635872715	0.519832878
									SLC25A28	1.367491844	1.38200205	TRA2B	0.697037362	0.711723862
									SLC25A35	1.207768852	1.302811037	TRAF5	0	0
									SLC25A39	1.652708023	1.60709492	TRAFD1	0.597277965	0.745848818
									SLC25A4	1.507571639	1.653835907	TRAPPC4	0.617160417	0.56028296
									SLC25A43	1.515659955	1.740923522	TRAPPC6B	0.818032504	0.689980413
									SLC25A5	1.322304189	1.537941297	TRERF1	0.554104443	0.645910045
									SLC25A51	1.356840437	1.290270872	TRIB1	0.621467985	0.405130575
									SLC27A1	1.575158737	2.138081897	TRIB3	0.524070493	0.300398776
									SLC27A4	1.730555734	1.466864767	TRIM2	0.800063335	0.666565565
									SLC27A5	3.25054678	1.530494505	TRIM25	0.635731414	0.748929499
									SLC27A6	1.535112857	1.538895111	TRIM28	0.763389298	0.765417945
									SLC29A2	1.424352482	1.60579747	TRIM38	0.782654744	0.524190439
									SLC29A4	1.717529215	240.3	TRIM39-RPP21	0.776789684	0.094557449
									SLC2A4RG	1.612918033	2.046209025	TRIM41	0.625672291	0.67309564
[truncated: 611 more rows]

## Sheet: Sheet2
Symbol	Acc	chr	start	end	strand	length	WT.TSS.rep1	TOP3BKO1.TSS.rep1	TDRD3KO1.TSS.rep1	Y336FKI.TSS.rep1	WT.exon.rep1	TOP3BKO1.exon.rep1	TDRD3KO1.exon.rep1	Y336FKI.exon.rep1	WT.intron.rep1	TOP3BKO1.intron.rep1	TDRD3KO1.intron.rep1	Y336FKI.intron.rep1	WT.TES.rep1	TOP3BKO1.TES.rep1	TDRD3KO1.TES.rep1	Y336FKI.TES.rep1	WT.TSS.rep2	TOP3BKO1.TSS.rep2	TDRD3KO1.TSS.rep2	Y336FKI.TSS.rep2	WT.exon.rep2	TOP3BKO1.exon.rep2	TDRD3KO1.exon.rep2	Y336FKI.exon.rep2	WT.intron.rep2	TOP3BKO1.intron.rep2	TDRD3KO1.intron.rep2	Y336FKI.intron.rep2	WT.TES.rep2	TOP3BKO1.TES.rep2	TDRD3KO1.TES.rep2	Y336FKI.TES.rep2	TOP3B-KO.FC1.TSS	TOP3B-KO.FC2.TSS	TDRD3-KO.FC1.TSS	TDRD3-KO.FC2.TSS	Y336F-KI.FC1.TSS	Y336F-KI.FC2.TSS
A1BG	NM_130786.4	chr19	58345182	58353492	-	3382	0	0	0.2057	0.6988	0	0	0	0	0	0	0.0313	0.093	0.1658	0.0575	0	0.4367	0.4846	0.48	0.6117	0.4816	0.1593	0.3373	0.0977	0.178	0.0359	0.0126	0.0592	0	0.1682	0.1263	0.1456	0.2676	0	0.988468	205.7	1.25968	698.8	0.991763
A1BG-AS1	NR_015380.2	chr19	58351969	58355183	+	2130	0	0	0	0	0.1051	0	0.0724	0.6305	0.2065	0	0.1423	0.7041	n/a	n/a	n/a	n/a	0.1211	0.101	0	0	0.2248	0.2899	0.107	0.1978	0.3965	0.3502	1.0895	0.6665	n/a	n/a	n/a	n/a	0	0.827191	0	0	0	0
A1CF	NM_001198819.2	chr10	50799408	50885627	-	9481	0	0	0	0	0.5226	0.6935	0.6288	0.57	0.2622	0.3428	0.3069	0.2747	0	0	0	0	0	0	0	0	0.3544	0.5049	0.3728	0.34	0.2037	0.2451	0.1602	0.17	0	0	0	0	0	0	0	0	0	0
A2M	NM_000014.6	chr12	9067707	9115919	-	4610	0	0	0	0	0	0.0045	0.0314	0.0396	0	0.0021	0.0037	0.009	n/a	n/a	n/a	n/a	0	0	0	0	0	0.0364	0	0	0.0031	0.0063	0	0	n/a	n/a	n/a	n/a	0	0	0	0	0	0
A2M-AS1	NR_137424.1	chr12	9065176	9068055	+	2300	48.058	73.543	63.5781	59.5328	2.2474	2.7135	2.7722	2.3886	37.6389	53.408	41.6781	51.0011	n/a	n/a	n/a	n/a	36.5137	61.4831	60.1471	58.0295	1.5807	2.0985	1.9243	1.5378	26.0377	44.422	31.0254	42.1286	n/a	n/a	n/a	n/a	1.53026	1.68379	1.32292	1.6472	1.23874	1.58921
A2ML1	NM_144670.6	chr12	8822620	8876787	+	5127	0	0.0776	0	0	0	0	0	0	0.0079	0.0071	0.0041	0.0106	0	0	0	0	0	0	0	0	0	0	0	0	0	0	0	0.0049	0	0	0	0	77.6	0	0	0	0	0
A2MP1	NR_040112.1	chr12	9228532	9234207	-	1201	0	0	0	0	0	0	0	0	0	0	0	0	0	0	0	0	0	0.0757	0	0	0	0	0	0	0	0	0	0	0	0	0	0	0	75.7	0	0	0	0
A3GALT2	NM_001080438.1	chr1	33306765	33321098	-	1023	2.7244	2.0196	1.5091	3.4942	0.0503	0.0611	0.0462	0.3311	0.206	0.097	0.0773	0.2445	0	0	0	0	4.6046	3.4358	2.3377	3.9337	0.1328	0.0511	0.0368	0.0541	0.6887	0.2832	0.1027	0.2578	0.0454	0.0378	0	0	0.741029	0.746005	0.553717	0.507578	1.28209	0.854112
A4GALT	NM_017436.7	chr22	42692120	42720870	-	2092	4.0307	5.0662	7.7514	5.4597	1.0013	1.1874	1.7485	0.9332	0.2499	0.2458	0.3601	0.4323	0	0	0	0.0655	3.0293	3.8905	5.1997	9.4329	0.6151	1.0955	1.4578	2.8153	0.1682	0.1774	0.289	0.4829	0.0454	0.1389	0.0327	0.1806	1.25659	1.28387	1.92261	1.7159	1.35419	3.11286
A4GNT	NM_016161.3	chr3	138123712	138132390	-	1779	0	0	0	0	0	0	0	0	0	0	0	0.0284	0	0	0	0	0	0	0	0	0	0	0	0	0.0197	0	0.0142	0	0	0	0	0	0	0	0	0	0	0
AA06	NR_037584.2	chr17	33529786	33533760	-	632	0	0	0	0	0	0	0	0	0	0	0	0.0914	n/a	n/a	n/a	n/a	0	0	0	0	0	0	0	0	0	0	0	0	n/a	n/a	n/a	n/a	0	0	0	0	0	0
AAAS	NM_015665.6	chr12	53307459	53321610	-	1815	56.6918	52.8895	44.8625	33.6755	36.7249	33.7088	27.3875	22.2124	1.1633	1.0406	1.1242	1.0008	1.3995	0.5825	1.5434	1.3103	45.4402	45.4155	43.2806	29.3024	30.4302	30.8973	29.994	19.2866	0.7572	0.8717	0.753	0.7441	0	0.5684	1.4747	3.9136	0.932914	0.999434	0.791326	0.952453	0.594	0.644842
AACS	NM_023928.5	chr12	125065434	125143316	+	3256	14.3315	13.1274	12.1302	13.409	2.3321	1.887	2.0054	2.1584	0.0995	0.0499	0.0552	0.1225	0.4292	0.3495	0.3772	1.303	10.7542	12.6739	11.7104	17.3406	1.8991	1.984	2.0271	2.3951	0.082	0.1328	0.0566	0.1418	0.6967	1.0863	0.7755	1.5454	0.915918	1.1784	0.846342	1.08881	0.935566	1.6123
AACSP1	NR_135095.1	chr5	178764860	178818435	-	2825	0	0	0	0	0	0.0412	0.0546	0	0.0264	0.0313	0.0324	0.0357	0.0559	0.0388	0	0.0873	0	0.0757	0	0.1204	0	0	0	0.0507	0.0438	0.0336	0.0309	0.0727	0.0454	0.0926	0	0	0	75.7	0	0	0	120.4
AADAC	NM_001086.3	chr3	151814115	151828488	+	1563	0	0	0	0	0	0.0874	0	0	0.0349	0	0	0	n/a	n/a	n/a	n/a	0.1817	0.0757	0	0	0	0.064	0	0	0.0248	0.0099	0	0.0188	n/a	n/a	n/a	n/a	0	0.41434	0	0	0	0
AADACL2	NM_207365.4_2	chr3	151733926	151761339	+	5060	0	0	0	0	0	0	0	0	0.0116	0.0069	0.0107	0	n/a	n/a	n/a	n/a	0	0	0	0	0	0	0	0	0	0.005	0	0	n/a	n/a	n/a	n/a	0	0	0	0	0	0
AADACL2-AS1	NR_110202.1_2	chr3	151751178	151928175	-	772	0	0	0	0	0	0	0	0	0.3968	0.3089	0.2758	0.3171	n/a	n/a	n/a	n/a	0	0	0	0	0	0	0	0	0.4102	0.3118	0.2337	0.2333	n/a	n/a	n/a	n/a	0	0	0	0	0	0
AADACL3	NM_001103170.3	chr1	12716109	12728760	+	4055	0	0	0	0	0	0	0	0	0	0	0	0	0	0	0.0685	0	0	0	0	0	0	0	0	0	0	0	0	0	0	0.0378	0.0655	0	0	0	0	0	0	0
AADACL4	NM_001013630.2	chr1	12644084	12667076	+	2027	0	0	0	0	0	0	0	0	0.0267	0.0277	0.0147	0	0	0	0	0	0	0	0	0	0	0	0	0	0.0736	0.0162	0.0218	0.0086	0	0	0	0	0	0	0	0	0	0
AADACP1	NR_026915.1	chr3	151770455	151784894	+	1289	1.1196	0.1294	0.4458	1.1356	0.1737	0.0903	0.1197	0.1143	0.1192	0.0147	0.086	0.254	n/a	n/a	n/a	n/a	1.3935	0.4042	0.3277	0.6021	0.2168	0.1278	0.0488	0	0.2315	0.1181	0.0998	0.1373	n/a	n/a	n/a	n/a	0.115474	0.289853	0.397823	0.234995	1.01339	0.431768
AADAT	NM_001286682.2	chr4	170060221	170090240	-	2139	21.6466	31.0449	29.9998	25.0273	4.7157	6.9157	6.8592	6.0793	0.6538	0.8933	0.7799	0.799	0.2799	0.22	0.2915	0.5678	20.8116	29.0026	29.4072	28.3792	4.2542	6.8762	6.8664	6.3546	0.6642	0.9424	0.7824	0.8829	0.0757	0.3915	0.4369	0.6623	1.4341	1.39351	1.38583	1.41295	1.15612	1.36356
AAGAB	NM_024666.5	chr15	67200666	67254661	-	3132	29.1483	32.1065	28.2277	27.5606	3.8914	4.5195	4.0113	3.7508	0.3171	0.2441	0.2163	0.4195	1.2876	0.8156	0.8917	2.5551	27.5368	26.0888	28.14	32.0721	3.3431	3.5426	4.1098	4.4373	0.2955	0.2725	0.2683	0.4288	2.9081	1.781	0.994	2.4084	1.10145	0.947381	0.968383	1.02187	0.945498	1.16466
AAK1	NM_014911.5	chr2	69457996	69643739	-	21157	26.0133	30.2595	28.6736	27.0365	0.5051	0.7829	0.7994	0.8942	0.055	0.0404	0.0354	0.1058	0.1679	0.0906	0.12	0.3057	24.2651	25.693	27.1568	31.5904	0.5681	0.6243	0.6462	0.8917	0.0563	0.049	0.0466	0.116	0.3029	0.1263	0	0.3612	1.16319	1.0588	1.10222	1.11913	1.03929	1.30183
AAMDC	NM_001316958.2	chr11	77821143	77900773	+	744	46.8015	38.4847	37.0424	30.9238	40.0509	25.8657	27.5177	18.9672	0.323	0.5528	0.6244	2.0825	n/a	n/a	n/a	n/a	37.261	28.9941	24.6443	27.1348	28.4203	16.6204	16.0229	16.2277	0.2289	0.4315	0.1847	1.8003	n/a	n/a	n/a	n/a	0.822279	0.778114	0.791462	0.661379	0.66073	0.728216
AAMP	NM_001302545.2	chr2	218264128	218270137	-	1763	26.4611	26.5655	27.1644	26.7744	12.2187	10.7791	10.7232	12.2998	0.6595	0.5346	0.32	0.865	0	0	0	0.9827	22.9019	24.4298	23.3116	23.5623	10.07	9.9205	10.0832	9.1179	0.5554	0.6846	0.6063	1.0134	0	0	0	1.5052	1.00391	1.06667	1.02654	1.01784	1.0118	1.02879
AANAT	NM_001166579.2	chr17	76453350	76470117	+	1913	30.9397	24.7531	26.993	20.1354	3.778	3.2483	2.8658	3.2943	0.1919	0.1281	0.1609	0.3528	n/a	n/a	n/a	n/a	24.053	21.6508	19.9325	22.4384	2.9774	2.637	2.0329	3.7287	0.2207	0.2433	0.1842	0.2535	n/a	n/a	n/a	n/a	0.800017	0.900091	0.872411	0.828656	0.650774	0.932834
AAR2	NM_015511.5	chr20	36236477	36256933	+	2696	19.5193	23.7951	18.7956	22.8871	2.1942	2.3843	2.1319	2.6119	0.1659	0.0407	0.0847	0.4319	0.7277	0.3366	0.2229	1.2448	19.6604	23.9751	19.5101	25.6764	2.0151	2.3149	2.4254	3.7658	0.222	0.3178	0.2119	0.3207	0.6513	0.72	0.5571	0.6021	1.21899	1.2194	0.962875	0.992305	1.17248	1.30593
AARD	NM_001025357.3	chr8	116938206	116944487	+	2291	0.087	0.138	0	0	0.057	0.0904	0	0	0	0	0	0	0	0	0	0	0.2625	0.101	0.1383	0	0.1718	0.0661	0.0905	0	0	0	0	0	0	0	0	0	1.56818	0.383302	0	0.524858	0	0
AARS1	NM_001605.3	chr16	70252297	70289506	-	3437	32.3206	39.0629	26.307	21.5185	4.5545	6.646	4.6618	2.7289	0.9637	0.7328	0.4713	0.8872	n/a	n/a	n/a	n/a	49.7116	31.1752	37.134	20.9934	8.6816	5.2626	6.8788	2.8737	1.6187	0.8982	0.819	0.8842	n/a	n/a	n/a	n/a	1.20857	0.627109	0.813914	0.746974	0.665762	0.422295
AARS2	NM_020745.4	chr6	44298730	44313347	-	4798	80.0055	74.1558	70.2092	59.9404	18.9393	17.9343	16.9505	15.6956	1.2788	0.6621	0.4091	0.7574	n/a	n/a	n/a	n/a	72.9165	70.1233	65.2158	74.4469	17.2802	18.0289	16.0928	18.8641	1.1624	0.6821	0.5351	0.7942	n/a	n/a	n/a	n/a	0.926872	0.96168	0.877544	0.894378	0.749194	1.02097
AARSD1	NM_001261434.2	chr17	42950525	42964454	-	1320	32.0718	35.369	34.5729	32.5981	8.7854	12.4674	12.2001	11.7116	1.287	0.7193	0.7864	1.2727	0.7464	0.1683	0.24	1.1137	37.8164	35.7227	28.8828	44.7163	11.296	12.9616	9.178	18.1197	1.1803	1.1844	0.9384	1.2375	0.6967	0.5431	0.4041	0.8763	1.10277	0.94461	1.07795	0.763744	1.01638	1.18243
AASDH	NM_001323890.2	chr4	56338289	56387491	-	3698	72.4043	72.7058	57.9989	56.6064	9.1794	9.7267	7.7021	6.0291	1.3311	1.2011	0.9549	1.0732	0	0.1035	0	0.0655	87.0231	67.5548	59.7538	53.3063	11.1354	8.4597	8.0148	6.4692	1.6177	1.2402	0.9842	0.8628	0.0605	0.1389	0.0436	0	1.00415	0.776277	0.801031	0.686635	0.781799	0.612546
AASDHPPT	NM_015423.3	chr11	106077661	106098695	+	2767	41.5889	55.8757	45.0683	27.8955	11.9543	15.4701	11.9152	6.9647	0.518	0.3564	0.3663	0.57	0.6344	0.3495	0.4973	1.9655	46.1269	45.4492	48.6114	33.4369	13.7253	13.4125	14.4597	9.5335	0.373	0.3862	0.3523	0.4758	0.8633	1.301	0.9176	0.9031	1.34349	0.985287	1.08364	1.05384	0.670728	0.724874
AASS	NM_005763.4	chr7	122073548	122144249	-	5825	3.7695	2.5633	1.8178	3.3195	0.4095	0.2764	0.2049	0.327	0.0355	0.0184	0.009	0.0313	0.0746	0	0	0.0655	4.2107	1.3137	1.7696	4.0943	0.4537	0.1465	0.1919	0.3943	0.0278	0.0108	0.012	0.0285	0	0	0	0	0.67983	0.311917	0.482111	0.420163	0.880387	0.972125
AATBC	NR_026961.1	chr21	43805757	43812567	-	4598	0.1492	0.0776	0	0.3057	0.8279	0.6115	0.6659	1.7281	1.8981	0.6601	0.9415	4.0494	1.6794	1.068	0	3.4396	0.2423	0.48	0.284	1.5654	1.5519	1.5907	1.1398	2.5996	2.0328	2.0044	1.2753	2.9981	1.8176	0	0.8192	1.2042	0.516644	1.97287	0	1.16728	2.03529	6.43403
AATF	NM_012138.4_2	chr17	36948953	37056871	+	2062	29.111	26.462	25.9869	20.6159	11.6485	12.408	10.9444	9.4134	0.2337	0.0988	0.1549	0.3199	0.2612	0.1035	0.3772	0.2839	28.597	25.693	33.3616	24.3116	11.7889	11.1523	14.5333	10.553	0.2417	0.2708	0.2476	0.2994	0.1211	0.8336	0.3167	0.5619	0.908972	0.898419	0.892653	1.16657	0.708158	0.850115
AATK	NM_001080395.3	chr17	81117294	81166221	-	5461	0	0	0	0	1.3449	1.047	1.5406	2.096	0.3515	0.4438	0.5121	0.43	n/a	n/a	n/a	n/a	0	0	0	0	1.5224	1.3964	1.7233	2.1339	0.3442	0.4795	0.5168	0.4801	n/a	n/a	n/a	n/a	0	0	0	0	0	0
ABALON	NR_131907.1	chr20	31721506	31723409	+	1903	4.7398	5.0749	8.3002	11.0068	16.0287	21.4038	24.1069	19.2656	0	0	0	0	0.7775	0.561	0.6859	0.1455	8.0883	7.9327	10.1155	11.8414	21.6518	18.3152	26.9653	19.2904	0	0	0	0	0.3029	0.2105	0.0728	0.1338	1.07047	0.980641	1.7508	1.25048	2.32172	1.46383
ABAT	NM_001386600.1	chr16	8712948	8784570	+	5463	0	0	0	0	0.0409	0	0	0.0611	0.0143	0	0.0023	0.0085	0	0.0388	0.0514	0	0	0	0	0	0	0.0323	0	0.0771	0.002	0.0068	0.0019	0.0027	0	0.0884	0.0436	0.1404	0	0	0	0	0	0
ABCA1	NM_005502.4	chr9	104781005	104928155	-	10408	1.1942	2.6151	1.7492	0.7862	0.0473	0.1272	0.038	0.0141	0.0687	0.0627	0.0786	0.0502	0	0	0	0	1.2723	2.021	1.5075	0.9232	0.0462	0.0884	0.089	0.0254	0.0651	0.0594	0.0666	0.0457	0	0	0	0.0602	2.188	1.58721	1.46352	1.18393	0.657798	0.725045
ABCA10	NM_001377321.1	chr17	69148006	69228824	-	6008	0	0	0	0	0.1211	0.0209	0	0.0085	0.0192	0.0144	0.0096	0.0045	0	0	0	0	0	0	0	0	0.029	0.0446	0.031	0.0934	0.0529	0.008	0.008	0.0045	0	0	0	0	0	0	0	0	0	0
ABCA11P	NR_002451.2	chr4	425434	474209	-	1895	30.4421	32.469	35.5447	25.1438	18.4375	20.6115	24.0622	14.9528	0.5411	0.2973	0.2374	0.6889	1.0387	0.1683	0.1543	1.0919	31.1114	28.312	37.8696	24.0039	18.9163	18.2117	25.7556	15.5676	0.5238	0.367	0.3478	0.4423	0.7472	0.2778	0.3604	0.6422	1.06655	0.909991	1.16758	1.21719	0.825928	0.771522
ABCA12	NM_173076.3	chr2	214931541	215138626	-	9298	1.7541	4.324	1.7492	5.0229	0.0608	0.2457	0.0303	0.2418	0.0129	0.0203	0.0097	0.0339	n/a	n/a	n/a	n/a	5.8163	2.3747	0.9613	4.2147	0.4521	0.1485	0.0723	0.1988	0.0279	0.0141	0.0058	0.0165	n/a	n/a	n/a	n/a	2.46368	0.408213	0.996638	0.165248	2.86189	0.724511
ABCA13	NM_152701.5	chr7	48171457	48647497	+	17188	0	0	0	0	0	0	0	0	0.005	0.0026	0.0013	0.0058	0	0	0	0	0	0	0.0873	0	0	0	0.0032	0	0.0006	0.003	0.0012	0.0034	0	0	0	0	0	0	0	87.3	0	0
ABCA17P	NR_003574.1	chr16	2340921	2426699	+	4188	4.7398	8.7516	12.3474	4.4988	0.719	0.4998	0.5808	0.4067	0.0352	0.029	0.0292	0.0366	9.7689	5.8063	6.7396	4.5206	3.8169	6.619	9.5475	8.0682	0.3016	0.5651	0.6446	0.8301	0.0457	0.0425	0.0362	0.0302	3.9533	5.2106	6.03	4.4856	1.84602	1.73368	2.6045	2.50072	0.948954	2.11326
ABCA2	NM_212533.3	chr9	137007233	137028922	-	8146	8.9199	12.6872	15.9831	8.8665	0.2696	0.3661	0.5129	0.4762	1.4632	1.7488	2.3524	1.8093	0.0933	0.1294	0.1028	0.2839	6.7251	11.6465	13.1305	11.6005	0.2321	0.4383	0.3699	0.643	1.0622	1.7978	1.9145	2.0908	0.1969	0.1642	0.2075	0.1404	1.42219	1.73154	1.79165	1.95217	0.993902	1.7247
ABCA3	NM_001089.3	chr16	2275880	2340728	-	6602	6.4193	10.7194	15.6744	5.5034	0.3938	0.6893	0.9903	0.3266	0.2418	0.2098	0.2495	0.1599	0.4789	0.2934	0.6002	0.4367	4.544	8.539	12.0964	9.2724	0.4293	0.6023	0.7628	0.8363	0.2351	0.2163	0.2137	0.1725	0.3483	0.6947	0.6772	0.9566	1.66961	1.87877	2.44138	2.66147	0.857187	2.04013
ABCA4	NM_000350.3	chr1	93992833	94121148	-	7328	0	0	0	0	0.3482	0.1464	0.0421	0.4003	0.3287	0.1455	0.0952	0.2762	0	0	0	0	0	0	0	0	0.2012	0.1241	0.0329	0.2999	0.3371	0.1277	0.0738	0.2525	0	0	0	0	0	0	0	0	0	0
ABCA5	NM_018672.5	chr17	69244310	69315633	-	9373	0	0	0	0	0	0	0.0092	0	0.0036	0.0018	0.001	0.0042	n/a	n/a	n/a	n/a	0.1211	0	0	0	0	0.0121	0	0.0071	0.0022	0.0036	0.0047	0.0047	n/a	n/a	n/a	n/a	0	0	0	0	0	0
ABCA6	NM_080284.3	chr17	69078701	69141895	-	5321	0	0	0	0	0.0691	0.0905	0.0705	0.1168	0.0052	0.0071	0.0024	0.0107	n/a	n/a	n/a	n/a	0	0	0	0	0.0748	0.1403	0.0314	0.1404	0.0025	0.0047	0.001	0.0078	n/a	n/a	n/a	n/a	0	0	0	0	0	0
ABCA7	NM_019112.4	chr19	1040106	1065572	+	6815	26.7224	38.7868	36.0478	27.0802	4.864	6.0051	5.5005	4.09	1.361	1.5269	1.3455	1.5039	n/a	n/a	n/a	n/a	22.3263	48.4555	31.4172	33.0756	4.4382	5.9122	5.4231	5.219	1.3296	1.667	1.416	1.943	n/a	n/a	n/a	n/a	1.45142	2.17024	1.34892	1.40712	1.01335	1.4814
ABCA8	NM_001288985.2	chr17	68867288	68955392	-	6002	0	0	0	0	0	0	0	0	0.0722	0.0927	0.0751	0.0239	0	0	0	0	0	0	0	0	0	0	0	0	0.0608	0.0556	0.0638	0.0491	0	0	0	0	0	0	0	0	0	0
ABCA9	NM_080283.4	chr17	68974487	69060927	-	6377	0	0	0	0	0	0	0	0	0.0025	0.0084	0.0051	0.0106	0	0	0	0	0	0	0	0	0	0	0	0	0.0039	0.0028	0.004	0.0067	0	0	0	0	0	0	0	0	0	0
ABCA9-AS1	NR_126414.1	chr17	69004713	69018323	+	523	0.1368	0.2416	0	0	0	0	0	0	0.0156	0.0276	0	0	n/a	n/a	n/a	n/a	0	0.0757	0.0655	0	0	0	0	0	0.0138	0.0086	0.0075	0	n/a	n/a	n/a	n/a	1.75327	75.7	0	65.5	0	0
ABCB1	NM_001348945.2	chr7	87503016	87713295	-	5586	0	0	0	0	0.5612	0.3476	0.4835	0.3768	0.0885	0.0776	0.0787	0.0614	0	0	0	0	0	0	0	0	0.5922	0.4555	0.4717	0.3368	0.1356	0.0834	0.0783	0.0696	0	0	0	0	0	0	0	0	0	0
ABCB10	NM_012089.3	chr1	229516581	229558707	-	3869	22.9155	31.0449	34.3672	29.4825	3.7628	5.209	5.0979	3.4175	0.2498	0.1932	0.2768	0.3602	0.6531	0.233	0.3601	0.7643	20.7207	32.3626	36.2455	34.6009	3.0848	3.6871	5.9299	4.206	0.1479	0.2708	0.2553	0.3072	0.621	0.8336	1.136	0.9432	1.3547	1.56177	1.49967	1.74916	1.28652	1.66979
ABCB11	NM_003742.4_2	chr2	168920780	169031324	-	6934	0	0	0	0	0	0.0044	0	0	0.0416	0.0258	0.0153	0.0467	0	0	0	0	0	0	0	0	0	0	0	0	0.0377	0.0237	0.0136	0.0627	0	0	0	0	0	0	0	0	0	0
ABCB4	NM_018849.3	chr7	87401695	87475680	-	4314	0	0	0	0	0	0	0	0	0	0	0	0	n/a	n/a	n/a	n/a	0	0	0	0	0	0	0	0	0	0.0027	0	0	n/a	n/a	n/a	n/a	0	0	0	0	0	0
ABCB5	NM_001163941.2	chr7	20615666	20757008	+	5350	0	0	0	0	0	0	0.0089	0	0.0037	0.0008	0.0021	0.0048	0	0	0	0	0	0	0	0	0	0	0.0126	0	0	0.0047	0.0033	0.0061	0	0	0	0	0	0	0	0	0	0
ABCB6	NM_005689.4	chr2	219209771	219218958	-	2980	19.5566	19.0309	21.7453	22.1883	6.1603	6.3465	6.6017	8.347	1.2121	1.2618	1.5265	2.1106	n/a	n/a	n/a	n/a	17.0855	21.3224	22.6343	29.182	5.2876	7.0972	6.928	10.3408	1.1258	1.5382	1.458	1.7334	n/a	n/a	n/a	n/a	0.973069	1.24791	1.11186	1.32469	1.13451	1.7079
ABCB7	NM_004299.6	chrX	75051047	75156283	-	4595	7.7629	8.5185	6.6196	7.5125	1.3144	1.1872	0.8883	1.1643	0.0177	0.0135	0.0138	0.0329	0	0	0	0.1091	8.9062	8.8338	5.7022	9.1921	0.8685	1.3146	0.7707	1.5594	0.0257	0.0261	0.026	0.033	0.0454	0	0	0	1.09719	0.991759	0.852613	0.640179	0.967619	1.03199
ABCB8	NM_001282291.2	chr7	151028449	151047782	+	4707	34.1494	36.4823	42.9761	37.6939	2.1997	3.0137	3.049	2.9659	2.3263	1.7161	2.3708	2.9493	n/a	n/a	n/a	n/a	33.1411	31.3268	31.439	35.8051	2.2823	2.6242	2.5825	2.9455	2.0823	2.0909	1.8366	2.6906	n/a	n/a	n/a	n/a	1.06828	0.945227	1.25844	0.948612	1.10376	1.08035
ABCB9	NM_019625.4	chr12	122928991	122966463	-	3484	17.3546	18.1505	19.5159	13.2343	4.4879	4.1524	5.0997	3.2551	0.3689	0.4079	0.7409	0.4557	3.2221	3.2538	2.8124	1.9655	15.3285	15.0823	17.3908	16.2969	3.4554	3.7026	3.7308	3.9402	0.4198	0.5916	0.7276	0.6364	3.5443	2.6526	2.4688	1.8263	1.0458	0.983874	1.12447	1.13447	0.762538	1.06311
ABCC1	NM_004996.4_2	chr16	15949615	16143053	+	6504	9.7036	13.8006	15.3657	10.2642	0.5449	0.4878	0.681	0.6706	0.2493	0.2022	0.255	0.4407	0.2612	0.1294	0.0514	0.6333	10.0877	12.2275	15.2935	13.9286	0.4913	0.6795	0.8622	0.9176	0.2298	0.3445	0.256	0.4623	0.3635	0.3031	0.6117	0.301	1.42207	1.212	1.58334	1.5159	1.05766	1.38061
ABCC10	NM_001198934.2	chr6	43427540	43450427	+	5043	20.8628	26.1772	26.5128	23.6733	2.653	3.5086	3.04	3.3168	0.8571	0.8462	1.0272	1.3823	n/a	n/a	n/a	n/a	18.3881	21.5245	25.9552	25.2884	2.2402	2.5936	3.4818	3.5409	0.7034	0.8967	1.0359	1.2741	n/a	n/a	n/a	n/a	1.25467	1.1705	1.27076	1.41144	1.13466	1.37518
ABCC11	NM_001370496.1	chr16	48165772	48244588	-	6054	21.9949	21.7237	25.3809	21.6641	2.6339	3.2174	3.3659	2.7565	0.2429	0.1721	0.2124	0.1903	0	0.0906	0	0.0582	15.5405	21.3982	17.3253	24.4856	2.0562	3.0516	2.6607	3.2959	0.1485	0.1728	0.1107	0.212	0	0.0757	0	0	0.987625	1.37684	1.15389	1.11478	0.984915	1.5755
ABCC12	NM_033226.2	chr16	48082972	48146770	-	5168	0	0	0	0	0	0	0	0	0.1164	0.1629	0.1465	0.1218	0	0	0	0	0	0	0	0	0	0	0	0	0.1286	0.1667	0.1151	0.117	0	0	0	0	0	0	0	0	0	0
ABCC13	NR_003087.1	chr21	14273798	14301386	+	2839	0	0	0	0	0	0.047	0	0	0	0	0	0	0	0	0	0	0	0	0	0	0	0	0	0	0	0	0.0035	0	0	0	0	0	0	0	0	0	0	0
ABCC2	NM_000392.5	chr10	99782639	99852594	+	5806	47.0254	37.3109	27.9762	35.3353	7.4047	4.7877	4.0787	5.7915	1.9692	0.8876	0.9721	2.1545	5.113	1.7693	1.4233	5.1976	36.3825	29.6089	22.2629	25.2482	5.5927	4.3611	3.7334	4.1985	1.4421	1.3372	0.9059	1.7687	3.2111	2.6274	1.4091	2.9904	0.793403	0.8138	0.594904	0.611896	0.751393	0.693946
ABCC3	NM_003786.4	chr17	50634880	50692253	+	5693	22.7663	23.6915	27.5074	20.6159	2.9187	3.534	3.2154	3.4278	3.3158	3.5569	2.9793	3.3016	2.7991	1.602	0.7074	3.8491	20.3875	18.8213	18.0244	25.5693	3.004	3.5007	3.0272	3.8483	2.8071	2.7946	2.3455	2.9362	3.692	1.2316	2.294	3.161	1.04059	0.923133	1.2082	0.884047	0.905505	1.2541
ABCC4	NM_005845.5	chr13	95019834	95301451	-	5855	23.9232	25.9441	30.5943	23.0618	1.7044	1.55	1.9512	1.7085	0.1137	0.0827	0.0946	0.1735	0.1306	0	0.1028	0.0655	20.1148	27.3857	33.4272	26.6933	1.2956	1.7559	2.2481	1.6459	0.1256	0.1567	0.1388	0.2216	0	0.0757	0.0655	0.0802	1.08443	1.3614	1.2788	1.66174	0.963953	1.32698
ABCC5	NM_005688.4	chr3	183919933	184017884	-	5790	15.2646	18.9791	18.0067	14.0205	0.7713	1.1564	0.9396	0.4992	0.1179	0.1307	0.1164	0.1441	0	0.0906	0.0514	0	12.9353	14.0718	14.2448	14.611	0.8287	0.8145	0.8787	0.7175	0.2015	0.1343	0.1378	0.125	0.1211	0.1768	0.131	0.1003	1.24326	1.08778	1.17956	1.10115	0.918438	1.12946
ABCC5-AS1	NR_046570.1	chr3	184006337	184011419	+	469	1.4555	2.4338	1.4748	2.6643	0	0.9308	0.691	1.056	0	0.0921	0	0.0994	n/a	n/a	n/a	n/a	6.3616	2.1979	2.3377	1.8063	1.4455	0.7166	0.3081	0.7125	0.1664	0.0589	0.0284	0.1219	n/a	n/a	n/a	n/a	1.67099	0.345441	1.01256	0.367413	1.82925	0.283893
ABCC6	NM_001171.6_2	chr16	16149564	16223494	-	5140	0.8957	0.1553	0.2743	0.4367	0.492	0.1721	0.2541	0.7398	0.259	0.2302	0.3804	0.4716	0.2985	0.2459	0.1543	0.3931	0.5755	0.1515	0.3277	0.2007	0.3795	0.3996	0.3205	0.3954	0.2837	0.3101	0.3414	0.4486	0.318	0.341	0.4041	0.582	0.173191	0.262793	0.305899	0.56843	0.487008	0.348135
ABCC6P1	NR_003569.1_2	chr16	18571247	18598289	+	2728	0.9206	0.3883	0.7088	0.3057	0.3479	0.0955	0.0599	0.0381	0.5587	0.3642	0.6517	0.7679	0	0	0	0	0.3635	0.1936	0.4806	0.1204	0.1059	0.0368	0.1251	0	0.3775	0.3995	0.4528	0.5101	0	0	0	0	0.421332	0.531139	0.769097	1.31852	0.331706	0.330316
ABCC6P2	NR_023387.2_2	chr16	14822426	14824702	-	711	0.8584	0.4142	0.4001	0.131	0.2204	0.1174	0.2477	0.1852	0.3691	0.099	0.1528	0.0414	0	0	0	0	0.4846	0.1347	0.4952	0	0.3463	0.1071	0.2853	0	0.2218	0.0239	0.125	0	0	0	0	0	0.481964	0.277389	0.465557	1.01977	0.152432	0
ABCC8	NM_001351295.2	chr11	17392497	17476845	-	5374	0	0	0	0	0.0196	0.0136	0.0274	0.023	0.1687	0.1584	0.1127	0.1206	0	0.0844	0.0894	0	0	0	0	0	0.0236	0.0024	0.0251	0	0.1518	0.1162	0.0977	0.0991	0.079	0.1647	0	0.0785	0	0	0	0	0	0
ABCC9	NM_005691.4	chr12	21797388	21941426	-	8844	0	0	0	0	0	0	0	0	0.002	0.008	0.0015	0.0033	0	0	0	0	0	0	0	0	0	0	0	0	0.004	0.0011	0.0019	0	0	0	0	0	0	0	0	0	0	0
ABCD1	NM_000033.4	chrX	153724855	153744755	+	3669	12.8387	16.1568	18.8985	12.3171	1.6669	1.7826	2.4833	2.0338	0.4966	0.7657	1.0586	0.5974	0	0	0	0	14.3591	16.5981	21.3453	16.2166	1.8348	2.1209	2.5648	2.6803	0.2799	0.7027	0.7511	0.7048	0	0	0	0	1.25835	1.15585	1.47188	1.48643	0.959298	1.12928
ABCD2	NM_005164.4	chr12	39550032	39619803	-	6290	2.8364	2.3562	3.0868	2.7517	0.1335	0.118	0.1003	0.1063	0.0052	0.0036	0.0024	0.0196	0	0	0	0	2.2114	1.5916	1.9663	2.3682	0.0505	0.1029	0.085	0.1165	0.0057	0.0023	0	0	0	0	0	0	0.830408	0.7194	1.0879	0.888763	0.969796	1.07042
ABCD3	NM_002858.4	chr1	94418388	94518663	+	3604	43.8904	41.0567	41.5013	33.8794	12.1782	9.3862	9.2329	7.9301	0.0846	0.0372	0.0586	0.1149	0.3545	0.1683	0.1543	0.5459	38.4323	36.9101	37.4545	38.4945	10.3103	8.7974	9.4326	9.077	0.0742	0.0768	0.0811	0.1055	0.212	0.2652	0.1201	0.1204	0.935416	0.960368	0.945545	0.974533	0.771892	1.00159
ABCD4	NM_001353591.2	chr14	74285268	74302934	-	2909	35.0451	41.3501	42.6674	29.6135	3.7338	4.405	5.3264	3.0102	0.69	0.5816	1.0203	1.2463	0.3918	0.0388	0.1714	0.3712	32.414	36.708	40.8336	34.6009	3.6763	4.0436	5.3535	4.1021	0.6134	0.7973	0.9555	1.1572	0.1363	0.1515	0.0327	0.1605	1.17988	1.13244	1.21746	1.25971	0.844987	1.06743
ABCE1	NM_002940.3	chr4	145098310	145129524	+	3887	49.8619	47.15	44.7939	43.8524	4.4202	4.8204	5.1156	3.6732	1.2394	0.8606	0.807	1.6788	3.1536	1.6312	2.0236	5.5907	48.8331	46.106	56.7388	46.5628	4.4393	5.1353	7.344	3.9168	1.197	1.3308	1.1757	1.4422	3.5998	3.5579	2.6217	3.8735	0.945593	0.944135	0.898341	1.16187	0.879459	0.953489
ABCF1	NM_001025091.2_7	chr6	30571441	30591522	+	3405	49.9863	50.7318	49.5843	36.7766	7.46	7.6733	7.3222	5.3721	0.5325	0.2865	0.3793	0.7874	0.4292	0.1424	0.0685	0.6988	49.4289	49.2724	49.7985	46.3754	7.5083	8.1945	8.3868	6.5826	0.5908	0.601	0.6148	0.6843	0.5604	0.7958	0.3058	0.5218	1.01489	0.996814	0.991938	1.00746	0.735719	0.938205
ABCF1-DT	XR_001744078.2	chr6	30563612	30571301	-	543	50.1729	50.7318	49.4814	37.1697	54.4974	52.5873	54.1226	47.0815	1.354	0.6231	0.6972	1.3341	n/a	n/a	n/a	n/a	49.5198	49.2976	49.864	46.4958	53.0108	47.5858	43.0294	57.8623	1.2714	1.0565	0.8144	1.0578	n/a	n/a	n/a	n/a	1.01112	0.995493	0.986198	1.00693	0.740817	0.938915
ABCF2	NM_007189.3	chr7	151211483	151227205	-	4527	29.7081	34.7475	34.5044	28.5652	1.8549	1.6235	1.2945	2.7863	0.904	0.8356	0.7311	1.1491	n/a	n/a	n/a	n/a	32.0505	30.9479	27.8997	32.0721	2.3069	1.9081	1.4812	1.7015	1.265	1.0367	0.8557	1.2601	n/a	n/a	n/a	n/a	1.16959	0.965568	1.16141	0.870465	0.961497	1.00064
ABCF2-H2BE1	NM_005692.5	chr7	151207836	151227205	-	2224	29.7081	34.7475	34.5044	28.5652	1.8327	2.3264	1.969	1.9719	1.2172	0.831	0.7288	1.73	0	0	0.1187	0.2015	32.0505	30.9479	27.8997	32.0721	2.6896	1.7904	1.9268	1.7475	1.637	1.4218	1.0213	1.8553	0	0	0.252	0.4631	1.16959	0.965568	1.16141	0.870465	0.961497	1.00064
ABCF3	NM_018358.2	chr3	184186074	184194007	+	2572	25.6774	29.5432	27.6789	24.4158	7.0344	7.8616	7.886	6.7432	0.8828	0.9168	0.8625	1.237	0.6282	0.3754	0.2229	1.1137	27.2641	26.0215	25.4527	26.4123	7.6368	6.7591	6.7303	7.4343	0.9783	0.9144	0.8979	1.2757	0.8482	1.3389	0.8957	1.3045	1.15051	0.954389	1.07791	0.933527	0.95083	0.968722
ABCG1	NM_207627.2	chr21	42199688	42297244	+	3119	0	0.0776	0.1371	0	0	0	0	0	0.2072	0.2372	0.2702	0.1179	0	0	0	0	1.6964	0.2021	0.131	0	0.0214	0	0	0	0.2023	0.2402	0.2786	0.1785	0	0	0	0	77.6	0.119064	137.1	0.0771769	0	0
ABCG2	NM_001348988.1	chr4	88090263	88158859	-	4625	17.2053	13.8006	15.7773	18.694	1.3239	0.9225	1.0617	1.3314	0.0201	0.0127	0.0217	0.0327	0	0	0	0	11.4509	13.0865	12.7154	23.4018	0.7561	0.947	0.9542	1.4246	0.0078	0.0209	0.012	0.0263	0	0	0	0	0.802067	1.14274	0.916949	1.11033	1.08646	2.04349
ABCG4	NM_022169.5	chr11	119149051	119162653	+	3812	3.9561	4.7124	6.6882	4.2804	1.1948	1.2477	1.7951	1.1781	0.0609	0.0551	0.0655	0.0567	0.0746	0.0517	0.0514	0	4.6652	4.7495	4.9376	6.3823	1.2298	1.393	1.362	1.7794	0.0711	0.1486	0.07	0.1088	0	0	0	0	1.19087	1.01785	1.69018	1.05816	1.0817	1.36777
ABCG5	NM_022436.3	chr2	43812471	43838839	-	2760	0	0	0	0	0.0146	0	0	0.0227	0.0409	0.0148	0	0.0278	n/a	n/a	n/a	n/a	0	0	0	0	0	0	0	0	0.0436	0.016	0.0097	0.0144	n/a	n/a	n/a	n/a	0	0	0	0	0	0
ABCG8	NM_001357321.2	chr2	43838970	43882988	+	7177	0	0	0	0	0.8006	0.5602	0.8997	1.8213	0	0.0052	0.0055	0	2.967	0.9407	1.6977	4.6298	0	0	0	0	1.3406	1.1288	1.1278	2.1342	0.0064	0.0092	0.0115	0	3.3474	3.3221	2.0427	3.3517	0	0	0	0	0	0
ABHD1	NM_032604.4	chr2	27123814	27130812	+	1420	0.1119	0	0.2057	0.1747	1.9795	1.0773	1.1441	2.359	1.0073	0.6359	0.6522	1.6076	n/a	n/a	n/a	n/a	0.212	0.1768	0.3714	0	0.8387	2.1031	1.7759	2.1976	0.9481	0.964	1.2319	1.9823	n/a	n/a	n/a	n/a	0	0.830047	1.82197	1.74366	1.54739	0
ABHD10	NM_001272069.2	chr3	111979025	111993368	+	2656	88.6393	97.9768	80.9675	53.1995	13.208	18.0875	13.7704	10.4116	4.9922	3.8012	3.5966	3.4895	4.5532	1.5664	2.538	4.1057	106.623	86.6709	85.9931	54.2296	17.2212	15.7535	16.3973	10.0247	5.7825	4.3777	4.1741	3.3106	4.6954	2.88	2.5416	4.4957	1.10533	0.812865	0.913439	0.806508	0.600173	0.508606
ABHD11	NM_148912.4	chr7	73736093	73738802	-	1418	30.5292	39.3478	37.5226	21.271	15.1098	15.4109	14.0886	13.1878	1.7536	2.3113	2.338	4.3491	1.1627	0.2987	0.2374	1.4111	30.9296	31.8068	43.2806	22.6391	12.3999	12.8598	15.5226	13.1779	1.3452	2.0256	1.9652	5.432	0.5942	0.4081	0.4033	1.0652	1.28882	1.02833	1.22903	1.39928	0.69672	0.731932
ABHD11-AS1	NR_026690.1	chr7	73735068	73736000	+	473	3.5828	2.4856	2.7781	6.8137	3.0263	2.0076	1.2845	7.6445	1.8282	1.6373	2.6172	6.5673	n/a	n/a	n/a	n/a	1.454	3.5874	2.4251	5.2182	0.6868	2.7199	3.088	5.0688	1.0345	3.1051	2.3754	5.3336	n/a	n/a	n/a	n/a	0.693565	2.46557	0.775183	1.66674	1.90125	3.58639
ABHD12	NM_001042472.3	chr20	25300213	25390835	-	1960	43.8531	47.9527	50.4532	40.926	13.5846	13.215	13.2226	12.4805	0.2476	0.1767	0.2514	0.3563	n/a	n/a	n/a	n/a	41.805	44.7418	49.398	47.5663	13.2803	13.1655	15.2813	15.1229	0.2294	0.2209	0.2747	0.3303	n/a	n/a	n/a	n/a	1.09346	1.07022	1.15048	1.1816	0.933231	1.13779
ABHD12B	NM_001206673.2	chr14	50872052	50904970	+	1815	0	0	0	0	0.6585	0	0.2403	0.4985	0.1523	0.0462	0.0372	0.1562	0	0	0	0	0	0	0	0	0.3945	0.2244	0.2614	0.4096	0.1595	0.1075	0.089	0.1387	1.136	0	0	0	0	0	0	0	0	0
ABHD13	NM_032859.3	chr13	108218391	108234243	+	5313	29.7454	37.6216	38.9289	29.6572	4.6588	5.9613	6.7038	4.9152	0.5062	0.4435	0.4835	0.7028	0.3545	0.0517	0.1028	0.3494	26.5674	34.7879	31.876	37.21	4.6197	5.6207	5.8922	6.6926	0.4394	0.4245	0.2769	0.7192	0.0454	0.1515	0.284	0.1137	1.26474	1.30937	1.30869	1.19977	0.997001	1.40054
ABHD14A	NM_015407.5	chr3	51975063	51981196	+	1066	37.6203	46.7357	51.345	35.4226	25.5913	33.2146	39.2466	20.9972	1.4718	1.6163	1.8357	1.7031	n/a	n/a	n/a	n/a	29.8088	41.2807	36.3766	37.4108	20.9148	31.6945	27.8209	25.5985	1.1317	1.4488	1.1685	1.9045	n/a	n/a	n/a	n/a	1.24227	1.3848	1.36479	1.22029	0.941557	1.25498
ABHD14A-ACY1	NM_001316331.2	chr3	51975063	51989197	+	1836	37.6203	46.7357	51.345	35.4226	15.7675	19.9986	23.3945	14.3972	5.7733	7.2823	7.0376	4.9196	4.7398	2.7489	3.1097	6.2896	29.8088	41.2807	36.3766	37.4108	13.6914	20.17	17.5827	18.109	5.3728	6.8807	6.5496	5.893	3.8472	4.9011	3.7942	6.8037	1.24227	1.3848	1.36479	1.22029	0.941557	1.25498
ABHD14B	NM_032750.3	chr3	51968514	51974049	-	1851	21.0495	28.7232	24.1805	21.1691	3.5253	4.4996	5.3362	4.3359	4.2658	4.5167	4.8895	4.8066	0	1.8124	1.8864	4.5861	25.4667	26.5436	27.9361	20.4314	4.2582	4.9538	5.8776	3.8735	5.7273	5.1674	5.9205	4.7854	1.1612	2.1474	0.9831	4.014	1.36449	1.04225	1.14869	1.09692	1.00563	0.802248
ABHD15	NM_198147.3	chr17	29560546	29567037	-	3492	18.325	25.8664	24.6264	22.8871	5.6747	8.3917	8.1414	7.9293	0.6729	0.3373	0.4932	0.8509	0.4665	0.1941	0.12	0.7206	14.147	18.9476	19.4008	24.5257	4.525	6.7736	6.4997	8.5924	0.2734	0.9495	0.6059	0.8111	0.5301	0.6442	0.426	0.7024	1.41146	1.33924	1.3438	1.37128	1.24889	1.73351
ABHD16A	NM_021160.3_7	chr6	31686954	31703324	-	1977	48.4686	58.1543	61.4631	45.5559	10.0941	12.6281	14.7065	11.7926	0.8188	0.5589	0.6105	0.7397	0.4105	0.1035	0.0685	0.4367	54.8817	52.3209	51.8012	56.638	10.5342	11.1336	11.5788	15.7747	0.8413	0.7053	0.706	1.0644	0.0454	0.2273	0.1529	0.3211	1.19981	0.953322	1.26808	0.943853	0.939886	1.03198
ABHD16B	NM_080622.4	chr20	63861497	63862988	+	1491	0.2612	0.3883	0.6516	1.4413	1.0197	0.5115	0.552	2.1671	0	0	0	0	14.6301	16.4157	16.8749	18.0826	1.2117	1.9958	1.4638	1.8732	1.39	1.8919	1.0392	2.9386	0	0	0	0	12.3294	16.396	17.7695	18.0096	1.48093	1.64575	2.48513	1.20706	5.49695	1.54465
ABHD17A	NM_031213.4	chr19	1876809	1885496	-	1859	4.8269	4.2895	3.3955	3.0865	0.9338	1.012	0.5844	0.7954	0.2295	0.1194	0.1431	0.5093	6.7739	9.1011	8.5918	6.8137	4.1603	4	3.3281	4.9372	0.4771	0.5544	0.663	0.6775	0.1597	0.1831	0.2783	0.771	8.2398	8.3117	8.2366	8.4896	0.888482	0.961238	0.703308	0.799774	0.639305	1.18646
ABHD17B	NM_016014.4	chr9	71862451	71911193	-	1574	34.1494	41.8766	45.297	33.7483	17.1753	19.9177	22.7671	17.6387	0.1705	0.0702	0.0908	0.2983	0.1679	0.1035	0.0685	0.1091	39.3916	33.9795	46.6306	37.384	19.3808	16.7724	22.6803	20.7909	0.207	0.233	0.187	0.2519	0.2726	0.2147	0.1529	0.2609	1.22624	0.862586	1.3264	1.18374	0.988226	0.949011
ABHD17C	NM_021214.2	chr15	80695309	80755621	+	2361	24.7692	29.336	33.5669	22.13	7.4717	8.4747	8.8615	6.7556	0.1101	0.0836	0.087	0.1993	0.3918	0.3107	0.2743	0.4367	20.1552	27.9331	29.7276	28.2588	5.3265	8.5738	8.2516	7.2628	0.1402	0.2187	0.1645	0.2153	0.4998	0.6821	0.426	0.6623	1.18433	1.38583	1.35513	1.47486	0.893412	1.40199
ABHD18	NM_001366042.3	chr4	127965405	128039953	+	5865	46.0178	38.0359	38.5173	39.5283	3.507	2.978	3.7644	3.4712	0.2621	0.1929	0.1842	0.1939	0.1492	0.0906	0.0857	0.0873	34.4639	35.3942	35.0658	40.9431	2.804	2.6771	2.4966	3.9521	0.2383	0.2389	0.2462	0.2059	0.3029	0.1894	0.1966	0.1204	0.82653	1.02696	0.836991	1.01744	0.85896	1.18797
ABHD2	NM_007011.8	chr15	89088455	89202355	+	8822	15.7124	19.1344	18.6584	14.1079	1.0775	1.3757	1.3744	1.2406	0.1933	0.1485	0.1017	0.1464	0.0559	0	0.0514	0.4149	16.4796	17.0529	18.3958	17.4209	1.2451	1.4171	1.3555	1.5072	0.2004	0.1363	0.1577	0.1536	0.1969	0.4421	0.131	0.2007	1.21771	1.03473	1.18742	1.11621	0.897826	1.05705
ABHD3	NM_138340.5	chr18	21650900	21704774	-	2029	36.8739	29.172	31.3832	21.4894	15.921	10.7545	12.49	9.1045	0.5694	0.491	0.5799	0.7958	0.1306	0.1812	0.2229	0.2402	38.5333	30.0131	31.5046	26.6531	16.9513	11.6043	11.995	10.7079	0.7362	0.5278	0.6837	0.6065	0.212	0.4126	0.5461	0.4014	0.791107	0.778867	0.851072	0.817573	0.582765	0.691672
ABHD4	NM_022060.2	chr14	22598237	22612359	+	2509	6.3073	6.4472	6.0022	5.9838	0.5569	0.6472	0.7084	0.4734	0.7934	0.736	0.647	0.9487	1.2502	0.3624	0.4801	2.0965	7.2098	5.0274	5.6804	6.6632	0.8359	0.5142	0.9217	0.6232	0.8996	0.6434	0.713	0.9597	0.7118	0.8715	0.5898	2.1675	1.02202	0.697204	0.951477	0.787763	0.94856	0.924058
ABHD5	NM_001365650.1	chr3	43690869	43722725	+	5179	72.9517	80.0851	82.2137	72.5924	7.6021	10.5521	9.8391	8.2369	1.9194	1.7984	2.0154	2.1295	0.3358	0.0388	0.0857	0.3494	81.4491	81.5592	81.7037	81.9264	9.6021	11.1499	10.8899	10.6399	1.9386	1.8995	1.938	2.1807	0.1666	0.6442	0.131	0.4214	1.09777	1.00134	1.12695	1.00311	0.995061	1.00585
ABHD6	NM_001320126.2	chr3	58237791	58294734	+	2198	19.5939	24.1317	28.948	23.2802	5.8073	7.6684	9.5887	6.0261	0.0837	0.04	0.0554	0.1685	0.1119	0.0906	0.0514	0.131	18.1458	20.2361	18.9639	29.7439	4.6531	5.7629	6.1456	7.9317	0.0531	0.0607	0.0658	0.1536	0.0454	0.1263	0.1747	0.4415	1.23153	1.11513	1.47732	1.04503	1.18807	1.63907
ABHD8	NM_024527.5	chr19	17292130	17303425	-	2042	4.292	2.6928	3.4641	4.2804	29.5241	32.1548	29.9904	20.0477	2.2445	2.0122	2.7596	2.435	1.8287	1.7088	1.2004	1.0482	3.6655	2.9053	3.0368	4.4555	26.0547	32.0559	36.8946	21.8291	2.751	1.9603	2.6903	1.7727	1.454	1.3937	1.0596	1.4249	0.627254	0.792391	0.806918	0.828256	0.997065	1.21519
ABI1	NM_005470.4	chr10	26746595	26860958	-	3596	13.921	17.0889	14.9427	12.1133	3.5618	3.6654	3.7452	3.8224	0.1167	0.1006	0.1097	0.1623	n/a	n/a	n/a	n/a	16.722	14.6949	14.6817	15.735	4.2569	3.7549	3.6211	3.737	0.142	0.126	0.1215	0.1984	n/a	n/a	n/a	n/a	1.22747	0.878724	1.07332	0.877935	0.870083	0.94092
ABI2	NM_001375674.1	chr2	203328393	203432169	+	6338	10.3381	13.1533	15.1256	10.7447	0.9893	0.5861	0.6527	1.1862	0.1411	0.0575	0.1057	0.1454	0	0	0.4042	0.9827	11.5418	11.8233	15.9853	12.8449	1.1903	0.7031	0.6711	1.0599	0.1394	0.1547	0.1352	0.1897	0.6491	0.2706	0.4447	0	1.27219	1.0243	1.46295	1.38487	1.03923	1.11281
ABI3	NM_016428.3	chr17	49210706	49223225	+	1629	0	0	0	0	0.1374	0	0	0	0.0462	0	0	0.024	n/a	n/a	n/a	n/a	0	0	0	0	0	0.093	0.0804	0.011	0.0125	0.0104	0.018	0.0315	n/a	n/a	n/a	n/a	0	0	0	0	0	0
ABI3BP	NM_001375547.2	chr3	100749155	100993421	-	6737	0.4851	0.4401	0.6173	0.3057	0.1745	0.0609	0.0968	0.601	0.0581	0.0259	0.0474	0.1123	n/a	n/a	n/a	n/a	0.3029	0.7326	0.6991	0.8028	0.29	0.3567	0.3374	0.56	0.0841	0.0752	0.0669	0.1002	n/a	n/a	n/a	n/a	0.905369	2.41066	1.2699	2.30043	0.628883	2.64166
ABITRAM	NM_017832.4	chr9	108934399	108940954	+	1901	20.6389	23.4843	23.8718	20.9653	1.7448	2.4187	2.3556	1.8241	0.8413	0.3413	0.5096	1.5945	n/a	n/a	n/a	n/a	18.0246	20.5393	18.0026	25.3285	1.8498	2.6596	2.2238	2.9731	1.3162	1.0939	0.586	1.5183	n/a	n/a	n/a	n/a	1.13781	1.13945	1.15659	0.998724	1.01577	1.40514
ABL1	NM_007313.2	chr9	130713880	130887675	+	5881	3.9187	3.4954	3.8071	5.0666	0.227	0.0729	0.1412	0.4559	0.4247	0.3629	0.3379	0.3287	0.3358	0.0647	0.2057	0.5459	3.3928	2.8042	3.4738	8.028	0.247	0.2071	0.1298	0.3519	0.3924	0.3867	0.3336	0.3826	0.106	0.4547	0.1092	0.5017	0.891752	0.826271	0.971273	1.02357	1.2926	2.36549
ABL2	NM_001168238.2	chr1	179099329	179229677	-	11845	11.4577	12.575	10.2095	12.7539	0.6442	0.5777	0.5807	1.0805	0.1704	0.1015	0.1956	0.2608	0.7091	0.466	0.2572	0.6551	8.8053	10.0296	9.5038	11.3998	0.6512	0.7169	0.5856	0.7401	0.2042	0.1579	0.2312	0.3003	0.5755	1.0358	0.5571	0.9834	1.09742	1.13891	0.890982	1.0792	1.11303	1.29451
ABLIM1	NM_001322882.2	chr10	114431109	114685003	-	8047	1.5675	0	0.3086	0.4367	0.494	0.1282	0.1824	0.5104	0.5576	0.5749	0.5336	0.5471	1.4742	0.6732	0.4973	1.7689	0.5452	0	0.2403	0.2007	0.1311	0.2227	0.1824	0.2627	0.547	0.5835	0.4525	0.5679	1.1511	1.541	0.9248	1.7461	0	0	0.196748	0.439949	0.278419	0.367448
ABLIM2	NM_001130083.2	chr4	7965326	8158813	-	3725	7.6882	13.0238	10.9412	5.9401	1.1561	1.5753	1.2759	1.0113	0.1983	0.5311	0.3988	0.4923	0	0.1812	0	0	7.846	10.3328	9.8096	10.8378	0.9057	1.1603	1.3579	1.5874	0.1878	0.5324	0.4381	0.4882	0	0.1768	0.0436	0	1.69378	1.31678	1.42293	1.25011	0.772525	1.38114
ABLIM3	NM_014945.5	chr5	149141492	149260542	+	4439	6.27	7.8453	10.0837	5.2413	0.4683	0.5284	0.6973	0.4386	0.121	0.1186	0.2037	0.1539	0.1679	0.0906	0.2572	0.4367	5.9981	7.8569	10.0063	8.2689	0.4108	0.595	0.7415	0.7951	0.1135	0.1183	0.1541	0.1249	0	0.1515	0.3277	0	1.25104	1.30968	1.60799	1.66797	0.8358	1.37836
ABO	NM_020469.3_2	chr9	133250400	133275201	-	6339	5.5982	1.8124	4.7332	0.262	2.8159	2.1188	1.3999	3.2144	0.2682	0.0514	0.1422	0.0129	0.4665	0	0	0.0873	5.9375	2.0716	7.0787	0.2007	2.3694	2.075	1.1518	3.1602	0.1964	0.0641	0.175	0	0	0.0505	0	0	0.323689	0.348842	0.845335	1.192	0.0467924	0.0337964
ABR	NM_001322841.2_3	chr17	1003518	1229722	-	6010	0	0	0	0	0.6576	0.3753	0.7221	1.1952	0.5474	0.6679	0.6472	0.5063	n/a	n/a	n/a	n/a	0	0	0	0	0.6063	1.1838	0.7219	1.8907	0.5388	0.592	0.5454	0.569	n/a	n/a	n/a	n/a	0	0	0	0	0	0
ABRA	NM_139166.5	chr8	106759482	106770244	-	2754	0	0	0	0	0.3659	0.1046	0.523	0.9277	0.2656	0.3471	0.2569	0.319	0.3172	0.0906	0	0.1965	0	0	0	0	0.1484	0.6541	0.2498	0.4495	0.7149	0.4826	0.3069	0.695	0.2726	0.3663	0.0327	0.0802	0	0	0	0	0	0
ABRACL	NM_021243.3	chr6	139028744	139043302	+	782	41.7257	41.8421	30.1827	32.1031	21.8561	22.3679	16.7955	17.0184	1.7074	1.5132	1.209	1.5206	0.2425	0	0.1028	0.7862	46.6823	38.729	30.1063	28.4461	23.6556	18.89	17.3191	13.3825	1.608	1.493	1.3256	1.3421	0.1666	0.3789	0.142	0.2609	1.00277	0.829611	0.723343	0.644905	0.769366	0.609342
ABRAXAS1	NM_139076.3	chr4	83459516	83485100	-	4210	11.2338	12.4283	14.2682	10.7884	1.8411	1.409	1.5226	1.7852	0.5453	0.3039	0.3572	0.7498	n/a	n/a	n/a	n/a	10.2695	12.3286	12.1692	13.8082	1.1613	1.885	1.5044	1.8363	0.4749	0.4827	0.3231	0.6157	n/a	n/a	n/a	n/a	1.10623	1.20039	1.27	1.18487	0.960266	1.34445
ABRAXAS2	NM_032182.4	chr10	124801818	124836667	+	2955	47.4733	58.8534	55.5294	61.673	10.4347	12.6569	10.8858	13.4239	0.2681	0.2148	0.2513	0.6576	0.6344	0.2718	0.583	1.485	45.9249	53.8535	46.3101	69.9913	9.82	12.4546	9.0227	15.6833	0.3269	0.3262	0.2741	0.5421	1.0299	0.5052	0.4915	1.164	1.23969	1.17262	1.16967	1.00837	1.29908	1.524
ABT1	NM_013375.4	chr6	26596952	26600739	+	2943	33.8508	43.784	38.7802	33.8502	6.1343	6.9903	6.2178	7.7144	1.6091	1.1858	0.9808	1.731	0.7588	0.5437	0.8403	2.7735	36.9278	36.2027	41.1103	29.851	6.4843	7.0228	7.264	5.9793	1.143	0.9743	0.5234	2.3328	1.757	1.3894	0.9285	2.5288	1.2934	0.980338	1.14559	1.11323	0.999953	0.808339
ABTB1	NM_032548.4	chr3	127672951	127680926	+	1973	54.975	60.7953	60.3312	44.857	1.8917	3.3801	2.6297	1.8834	0.6137	0.6654	0.6619	0.2883	0	0.0388	0.1028	0	52.9227	46.2323	55.5154	42.2276	2.8945	2.7892	2.6425	2.239	0.5055	0.6344	0.7637	0.445	0.0454	0.101	0.0327	0	1.10585	0.873565	1.09741	1.04897	0.815938	0.797896
ABTB2	NM_145804.3	chr11	34150986	34358010	-	4905	21.6839	17.788	19.6188	20.7906	5.271	3.8091	4.3072	5.5441	0.2985	0.2875	0.2326	0.2759	0.4851	0.2071	0.1886	0.9827	22.8716	16.4718	22.0663	21.1138	5.2601	3.7816	4.8628	5.8085	0.3858	0.3156	0.2299	0.3282	0.5301	0.8715	0.4041	1.3246	0.820294	0.720154	0.904722	0.964748	0.958759	0.923105
ACAA1	NM_001607.4	chr3	38122714	38137127	-	1699	60.5359	68.0883	69.1459	44.0272	23.7209	26.9341	28.9931	22.0928	0.2193	0.0952	0.1757	0.4382	n/a	n/a	n/a	n/a	54.5586	59.0662	57.5691	45.7198	23.1871	29.2238	27.6388	26.96	0.1432	0.3326	0.2324	0.6148	n/a	n/a	n/a	n/a	1.12474	1.0826	1.14221	1.05516	0.727279	0.837979
ACAA2	NM_006111.3	chr18	49782163	49813533	-	2926	17.6905	23.0183	19.8588	16.5975	0.2747	0.2536	0.0455	0.1383	0.1127	0.1276	0.1104	0.153	0.0746	0	0	0	16.6816	17.1287	15.075	13.5674	0.2478	0.2517	0.0929	0.173	0.0707	0.1245	0.0342	0.0717	0	0	0.0327	0	1.30109	1.02674	1.12251	0.903636	0.938162	0.813267
ACACA	NM_198834.3_2	chr17	37084991	37406836	-	10013	74.9795	88.9403	78.7839	47.3903	1.4266	1.0981	1.7313	1.8687	0.4601	0.3296	0.4254	0.7116	1.866	1.4629	1.2518	4.3677	83.5798	78.9739	107.069	50.2155	1.2388	1.5885	1.6132	1.9034	0.4981	0.5374	0.625	0.7176	2.4083	2.7916	2.3814	3.2714	1.18618	0.944881	1.05073	1.28102	0.632035	0.600802
ACACB	NM_001093.4	chr12	109116586	109268226	+	9368	0	0	0	0.131	0.072	0.0863	0.1162	0.0902	0.2714	0.2322	0.1928	0.1952	0.2239	0.0388	0	0	0	0	0	0	0.1005	0.0881	0.164	0.1783	0.2346	0.2349	0.1973	0.2379	0.106	0.0757	0.0546	0	0	0	0	0	131	0
ACAD10	NM_001136538.2	chr12	111686052	111757099	+	4099	44.6742	41.7903	37.7284	37.6211	10.1413	8.1241	6.39	6.6429	0.0617	0.0382	0.0526	0.0643	0.1866	0.1294	0.0685	0.3057	41.9262	38.8048	35.175	47.2451	9.6641	7.8665	6.2796	9.142	0.069	0.0596	0.0629	0.0766	0.2272	0.3915	0.2075	0.3411	0.935425	0.925528	0.844504	0.838954	0.842103	1.12684
ACAD11	NM_032169.5	chr3	132558140	132659809	-	3231	42.099	38.5019	33.6126	42.1053	4.0561	2.9379	3.1507	3.3066	0.1011	0.0542	0.0695	0.0874	0	0.0388	0	0	43.5317	35.6974	35.0002	45.305	4.4896	3.3664	3.5788	5.0078	0.0939	0.0566	0.0681	0.0807	0.106	0.2273	0.142	0.3211	0.914534	0.820013	0.798399	0.803998	1.00013	1.04071
ACAD8	NM_014384.3	chr11	134253567	134265855	+	2176	20.6016	21.6201	24.5578	20.9216	4.2833	4.2113	4.9681	4.9974	0.2279	0.1653	0.1727	0.3076	0.1306	0.1035	0	0.0655	16.1161	19.1245	15.461	29.2623	3.1904	4.4793	3.247	7.1978	0.1808	0.2571	0.1836	0.4303	0.1817	0.341	0.2512	0.4014	1.04939	1.1866	1.19198	0.959292	1.01548	1.81561
ACAD9	NM_014049.5	chr3	128879619	128913114	+	2445	34.448	33.2717	35.3161	30.5307	5.7003	5.2652	5.6011	5.1164	0.3022	0.1327	0.1844	0.531	n/a	n/a	n/a	n/a	35.8978	30.291	35.3716	30.9883	5.6347	5.3647	5.4474	6.1276	0.3212	0.3408	0.3239	0.4034	n/a	n/a	n/a	n/a	0.965825	0.843789	1.02517	0.985314	0.886258	0.863213
ACADL	NM_001608.4	chr2	210187922	210225447	-	2515	0	0	0	0	0.4808	0.4864	0.3866	0	0.0198	0.0083	0.0089	0.0168	0	0	0	0	0	0	0	0	1.5935	0.6274	0.1876	0	0.0269	0.0227	0.008	0.0309	0	0	0	0	0	0	0	0	0	0
ACADM	NM_001127328.3	chr1	75724708	75763679	+	2273	45.5326	46.3473	47.5607	31.6227	16.5428	16.4692	17.6901	10.499	0.2652	0.1695	0.1629	0.2544	0.3296	0.6732	0.4458	0.8517	52.438	44.3628	52.6751	38.4812	20.9822	16.5849	17.2883	12.9249	0.2319	0.2268	0.2368	0.271	0.9542	1.061	0.6882	1.3045	1.01787	0.845989	1.04452	1.0045	0.694492	0.733828
ACADS	NM_001302554.2	chr12	120725825	120740008	+	1847	10.3008	9.9944	11.1813	12.2297	3.2319	3.6306	4.1487	3.6082	0.4588	0.271	0.3245	0.7051	0.0559	0.0388	0.0514	0.1965	10.1483	13.2633	12.6936	17.8624	3.2501	4.9947	5.1212	6.0644	0.3375	0.3373	0.3609	0.8552	0.0757	0.1768	0.142	0.301	0.970161	1.30682	1.08537	1.25069	1.18714	1.75996
ACADSB	NM_001609.4	chr10	123009005	123058290	+	5848	42.8827	47.5384	33.7155	37.7812	4.9063	5.1152	3.6008	4.0304	0.3594	0.3249	0.251	0.3536	0.0559	0.0517	0.0514	0.0873	47.7425	41.887	33.7549	44.9571	4.8462	4.1995	3.1976	4.6823	0.3044	0.297	0.2213	0.3729	0	0.2147	0.0436	0	1.10854	0.877334	0.786208	0.707005	0.881015	0.941638
ACADVL	NM_001270447.2	chr17	7217124	7225266	+	2227	0.3732	2.0196	1.269	0.3057	4.2996	3.6416	3.274	6.2386	23.6225	20.2357	20.8479	14.9118	n/a	n/a	n/a	n/a	0.3938	1.4147	1.0923	0.1204	4.0736	4.2864	3.5004	6.8532	21.6715	18.274	20.2046	15.7795	n/a	n/a	n/a	n/a	5.39711	3.58333	3.39123	2.76672	0.816943	0.304965
ACAN	NM_001369268.1	chr15	88803435	88875353	+	8960	0	0	0	0	0	0	0	0	0.0026	0.024	0	0.0041	0.0933	0	0	0.2547	0	0	0	0	0	0	0	0	0.0166	0.0168	0.0052	0.0028	0.1009	0	0	0	0	0	0	0	0	0
ACAP1	NM_014716.4	chr17	7336528	7351477	+	2511	0	0	0	0	2.1958	1.6775	1.7042	2.7406	1.0133	0.9296	1.1422	0.8783	0	0	0	0	0	0	0	0.1204	1.7283	2.4237	1.5213	2.6558	0.7738	1.1454	1.1691	0.9839	0	0.2706	0	0	0	0	0	0	0	120.4
ACAP2	NM_012287.6	chr3	195274744	195443020	-	7093	58.222	52.7341	59.9539	44.1582	9.9688	8.379	9.421	7.1153	0.0878	0.0761	0.1012	0.1535	0.4198	0.3329	0.3858	0.8891	57.0427	48.9524	64.1161	52.0218	9.7888	7.8002	10.5263	9.008	0.117	0.0976	0.1202	0.1285	0.806	0.7985	0.5969	1.0106	0.905726	0.858156	1.02973	1.12398	0.758432	0.911964
ACAP3	NM_030649.3	chr1	1292390	1307930	-	3793	8.8452	11.6774	12.759	13.1033	1.247	1.3802	1.343	1.8193	1.3925	2.5451	2.6294	1.6769	3.3589	0.7767	0	2.293	9.3001	12.7075	11.9944	18.13	1.5442	2.0799	1.5813	3.2873	1.1589	3.0627	2.14	2.453	0.9088	4.1684	0.4915	0.9031	1.32005	1.36624	1.44231	1.28957	1.48123	1.94923
ACAT1	NM_001386682.1	chr11	108116704	108147603	+	1840	0	0.0776	0	0.3931	0.5619	0.3132	0.5002	1.6201	6.3169	4.9483	4.299	4.1251	0.0746	0.0517	0.1714	0.3494	0.3635	0.0757	0.1966	0.2809	0.5094	0.3179	0.4896	1.3318	6.4545	5.2474	4.9256	4.1777	0.1767	0.2652	0.2403	0.4014	77.6	0.207682	0	0.539369	393.1	0.770645
ACAT2	NM_001303253.1	chr6	159762478	159779112	+	1723	25.3041	26.928	23.0715	19.9607	5.94	3.0272	5.0022	5.9219	0.9058	0.4049	0.5056	1.2108	n/a	n/a	n/a	n/a	23.6895	23.1667	21.3162	19.9096	4.1399	5.0784	4.5087	6.765	1.0557	1.0317	0.9423	1.5934	n/a	n/a	n/a	n/a	1.06413	0.97789	0.911733	0.899778	0.788801	0.840404
ACBD3	NM_022735.4	chr1	226144678	226186741	-	3584	22.8036	35.1618	30.2513	29.3951	7.0151	9.9384	8.8263	9.073	0.1032	0.0413	0.0647	0.2269	0.255	0.1424	0	0.262	25.4465	27.3604	22.5032	35.9256	8.2014	8.6031	6.9321	10.9689	0.0755	0.1703	0.1151	0.2503	0.2272	0.1894	0.1529	0.2609	1.54187	1.07517	1.32654	0.884299	1.289	1.41175
ACBD3-AS1	NR_146443.1	chr1	226148002	226154977	+	441	0.1119	0.1553	0.1028	0.3494	0	0	0	0.6863	0.1713	0.0534	0.0472	0.2506	n/a	n/a	n/a	n/a	0	0.2778	0.0873	0	0	0	0	0	0.1529	0.2184	0.1454	0.1382	n/a	n/a	n/a	n/a	1.37555	277.8	0.91054	87.3	3.09477	0
ACBD4	NM_001378112.1	chr17	45132618	45144176	+	3193	29.2603	36.7154	46.6804	24.5905	1.7855	2.8998	3.3872	2.0816	1.3529	1.4139	1.836	1.5859	5.5049	4.57	4.4416	5.1612	24.0833	32.8426	41.5983	29.8242	1.7831	2.7446	3.1392	2.9739	1.1145	1.5606	1.8555	1.5929	6.0284	5.9706	5.6367	3.5323	1.25474	1.36365	1.59529	1.7272	0.840376	1.23833
ACBD5	NM_001352568.1	chr10	27195213	27240879	-	4008	27.9167	27.0316	25.2437	19.5239	4.0415	3.8244	3.2615	3.2197	0.3667	0.3065	0.2767	0.2745	n/a	n/a	n/a	n/a	26.2644	22.3077	19.3572	20.6187	3.8818	3.1408	2.9517	2.7312	0.3659	0.2693	0.2655	0.2557	n/a	n/a	n/a	n/a	0.96826	0.849319	0.904218	0.736985	0.699338	0.785014
ACBD6	NM_032360.4	chr1	180288229	180502577	-	1293	75.2034	73.9486	69.5575	59.1397	47.1618	45.7256	45.1094	35.9677	0.076	0.0295	0.0375	0.1314	n/a	n/a	n/a	n/a	78.8439	69.7948	69.0829	60.652	46.0618	41.6608	42.84	36.537	0.1131	0.0931	0.0667	0.1021	n/a	n/a	n/a	n/a	0.983302	0.885216	0.924913	0.876187	0.786386	0.769257
ACBD7	NM_001039844.3	chr10	15075474	15088776	-	3370	3.2469	4.3499	2.6409	2.4896	0.6877	0.8574	0.4854	0.4199	0.1862	0.3513	0.2822	0.1369	n/a	n/a	n/a	n/a	3.4837	1.8695	2.0318	2.9703	0.5986	0.2901	0.3675	0.4287	0.2097	0.2602	0.1883	0.0751	n/a	n/a	n/a	n/a	1.3393	0.536488	0.81311	0.583063	0.766526	0.852383
ACBD7-DCLRE1CP1	NR_144471.1	chr10	15015071	15088776	-	997	3.2469	4.3499	2.6409	2.4896	2.3246	2.8982	1.6409	1.4194	0.0321	0.0597	0.0512	0.0394	0.1492	0.2848	0.0514	0.4149	3.4837	1.8695	2.0318	2.9703	2.0236	0.9806	1.2425	1.4494	0.043	0.047	0.0415	0.0284	0.2574	0.3284	0	0.4214	1.3393	0.536488	0.81311	0.583063	0.766526	0.852383
ACCS	NM_032592.4	chr11	44066269	44084237	+	2383	52.885	63.3068	66.2306	52.4133	13.2833	15.023	16.9851	14.0485	0.2044	0.3613	0.3358	0.4445	0.1306	0.1553	0.1886	0.4367	51.8625	56.363	55.0784	54.9922	12.1884	12.7347	13.1077	12.7667	0.2346	0.2808	0.2649	0.3042	0.0454	0.0378	0.1092	0.0602	1.19704	1.08676	1.25233	1.06199	0.991062	1.06033
ACCSL	NM_001363113.1	chr11	44047980	44059977	+	1867	0	0	0	0	0	0	0	0	0	0	0	0	0	0	0	0	0	0	0	0	0	0	0	0	0	0	0	0	0	0	0	0	0	0	0	0	0	0
ACD	NM_001082486.2	chr16	67657511	67660260	-	1511	18.6609	30.6565	31.0745	19.6113	6.483	8.4442	7.4999	8.2661	2.5856	2.5383	2.5437	3.5864	n/a	n/a	n/a	n/a	20.6298	31.15	26.6325	28.9813	6.8599	8.5769	7.9253	10.1385	2.8368	3.7485	2.8888	3.3816	n/a	n/a	n/a	n/a	1.64273	1.50988	1.66513	1.29091	1.05087	1.40476
ACE	NM_000789.4	chr17	63477060	63498373	+	4962	12.9133	16.4157	14.5426	11.5309	2.1645	2.223	2.4534	2.0065	0.9694	1.2313	0.8935	0.6885	0	0	0	0	11.3297	17.0023	18.2429	15.8554	1.9177	2.761	3.4882	3.1817	0.7008	1.1378	1.1246	0.746	0	0	0	0	1.27113	1.50055	1.12609	1.61004	0.892878	1.39933
ACE2	NM_001371415.1	chrX	15561032	15600960	-	3339	0	0	0	0	0	0	0	0	0.0183	0.0095	0.0098	0	n/a	n/a	n/a	n/a	0	0	0	0	0	0	0	0	0.0049	0.0103	0.0116	0.0181	n/a	n/a	n/a	n/a	0	0	0	0	0	0
ACER1	NM_133492.3	chr19	6306141	6333612	-	1428	0	0.1294	0	0.131	0	0	0	0	0	0	0	0	0	0	0	0	0	0.0757	0	0	0	0.0796	0	0	0	0	0	0	0	0	0	0	129.4	75.7	0	0	131	0
ACER2	NM_001010887.3	chr9	19409008	19452505	+	2773	11.0845	9.373	11.4557	10.0022	1.3372	1.0566	1.5703	1.3476	0.0688	0.0612	0.0457	0.0724	0.2799	0.2589	0.0685	0.3275	8.2398	8.059	8.5862	9.7541	1.1156	1.2824	1.3917	1.4183	0.0301	0.0507	0.0435	0.0406	0.6513	0.3284	0.1747	0.0602	0.845519	0.977939	1.03339	1.04191	0.902278	1.18364
ACER3	NM_001300954.2	chr11	76860917	77026797	+	7404	38.317	43.4215	45.5371	39.5575	5.0329	5.3232	5.1657	5.6726	0.0799	0.0334	0.0404	0.0995	0.3358	0.4531	0.2743	1.4195	34.1407	46.6113	47.672	47.5663	4.1702	6.0002	5.8213	6.3308	0.076	0.0613	0.065	0.097	0.7573	0.5305	0.7646	0.9232	1.13319	1.36523	1.1884	1.3963	1.03235	1.3932
ACHE	NM_001367918.1	chr7	100889993	100896994	-	2530	1.0076	1.4499	1.0632	1.2229	11.2635	9.0695	8.2698	8.4112	5.3194	4.6461	3.8905	2.8272	n/a	n/a	n/a	n/a	1.6358	1.0358	0.8083	1.7661	7.1888	7.2476	6.6691	7.5641	3.2569	3.8069	2.9379	2.5346	n/a	n/a	n/a	n/a	1.43754	0.63282	1.05413	0.493829	1.21247	1.079
ACIN1	NM_014977.3	chr14	23058563	23095614	-	4938	73.3746	82.9074	73.902	59.3144	20.0637	22.9661	20.5936	16.9743	2.158	2.1438	1.8623	2.4461	n/a	n/a	n/a	n/a	80.3081	81.0708	90.6613	68.8273	21.5589	22.4291	25.7117	19.2241	2.5647	2.6928	2.1573	2.6463	n/a	n/a	n/a	n/a	1.1299	1.00948	1.00717	1.1289	0.808367	0.85703
ACKR1	NM_001122951.3	chr1	159204874	159206500	+	1196	0	0	0	0	0	0	0	0	0	0	0	0	0	0	0	0	0	0	0	0	0	0	0	0	0	0	0	0	0	0	0	0	0	0	0	0	0	0
ACKR2	NM_001296.5	chr3	42809444	42867286	+	2990	0	0	0	0	0	0	0	0	0.2007	0.2329	0.1209	0.1039	0	0	0	0	0	0	0	0	0	0	0	0	0.1874	0.1637	0.08	0.1295	0	0	0	0	0	0	0	0	0	0
ACKR3	NM_020311.3	chr2	236569824	236582354	+	2015	3.8441	3.9615	2.1265	0.8298	2.1748	2.2412	1.203	0.4695	0	0	0	0	0	0	0	0	2.3326	5.6253	2.4032	1.2042	1.3196	3.1825	1.3596	0.6812	0	0	0	0	0	0	0	0	1.03027	2.41057	0.553042	1.02983	0.215807	0.516027
ACKR4	NM_016557.4	chr3	132597269	132602644	+	2310	0	0	0	0	0.0727	0	0	0	0.0547	0	0	0	n/a	n/a	n/a	n/a	0	0	0	0	0	0	0	0	0	0	0	0.0589	n/a	n/a	n/a	n/a	0	0	0	0	0	0
ACLY	NM_001303274.1	chr17	41866916	41919022	-	4369	37.7323	42.5929	39.8892	34.287	5.8591	7.9219	8.0424	5.8698	0.6932	0.4295	0.4668	1.0638	0	0.1664	0.7349	0	32.7775	40.548	51.2113	38.7755	5.2929	7.4372	10.6324	7.4621	0.5974	0.7198	0.7856	1.2648	0.5193	0.5413	0.1872	0.43	1.12879	1.23703	1.05714	1.56234	0.908667	1.18296
ACMSD	NM_001307983.2	chr2	134838615	134902034	+	1309	0	0	0	0	0	0	0	0	0.0072	0	0	0.0063	n/a	n/a	n/a	n/a	0	0	0	0	0	0	0	0	0.0021	0.0018	0.0015	0	n/a	n/a	n/a	n/a	0	0	0	0	0	0
ACO1	NM_001278352.2	chr9	32384642	32454769	+	7515	22.9155	22.604	32.5493	26.4687	1.1275	1.1603	1.5908	1.8785	0.2009	0.1565	0.2561	0.435	0	0	0	0	20.1754	24.0509	24.6225	38.0931	1.0316	1.4695	1.41	2.5237	0.2018	0.2424	0.2146	0.4533	0	0	0	0	0.986364	1.19203	1.42034	1.22036	1.15501	1.888
ACO2	NM_001098.3	chr22	41469116	41528974	+	2734	28.5636	27.3941	26.5471	24.6779	5.796	4.7198	4.3896	6.0713	0.6724	0.3125	0.4105	0.9466	n/a	n/a	n/a	n/a	28.9	29.0026	36.2019	30.132	5.413	5.6442	6.6628	5.7056	0.6084	0.6279	0.5591	1.0373	n/a	n/a	n/a	n/a	0.959023	1.00352	0.929371	1.25262	0.863933	1.04259
ACOD1	NM_001258406.2	chr13	76948510	76958638	+	2147	0	0	0	0.1019	0	0	0	0	0	0	0	0	0	0	0	0	0	0	0	0	0	0	0	0	0	0	0	0	0	0	0	0	0	0	0	0	101.9	0
ACOT1	NM_001037161.2	chr14	73537142	73543796	+	1686	1.7292	1.4068	1.0975	0.99	1.4654	1.3442	0.9429	0.8551	0.3853	0.4689	0.3842	0.1273	n/a	n/a	n/a	n/a	1.1107	1.3052	1.0122	1.3112	1.2043	1.1415	0.9004	1.1665	0.4022	0.3499	0.3122	0.2666	n/a	n/a	n/a	n/a	0.813085	1.17406	0.63432	0.910497	0.572188	1.17945
ACOT11	NM_015547.4	chr1	54548227	54639192	+	6369	0	0	0.1371	0.262	0	0.0237	0.0323	0	0.4451	0.3495	0.319	0.4324	0	0	0	0	0	0.1515	0	0.1204	0.0714	0.0432	0.0664	0	0.4127	0.4411	0.2891	0.4984	0	0	0	0	0	151.5	137.1	0	262	120.4
ACOT12	NM_130767.3	chr5	81329995	81394134	-	2086	0	0	0	0	0	0	0	0	0	0.0025	0	0	n/a	n/a	n/a	n/a	0	0	0	0	0	0	0	0	0.0017	0.0048	0	0	n/a	n/a	n/a	n/a	0	0	0	0	0	0
ACOT13	NM_001160094.2	chr6	24667076	24705046	+	4330	34.1867	40.2885	33.6126	28.7836	5.4066	6.1945	5.5957	6.234	0.2321	0.1229	0.1874	0.4114	n/a	n/a	n/a	n/a	31.4951	33.7942	30.5214	29.0616	5.9233	5.4377	5.3741	6.1603	0.3193	0.2285	0.2755	0.5226	n/a	n/a	n/a	n/a	1.17845	1.07296	0.983178	0.969053	0.841929	0.922705
ACOT2	NM_001364178.1	chr14	73569058	73574407	+	1150	0.1119	0.2416	0.2743	0	0.348	1.0159	0.692	0	0.2113	0.437	0.3128	0.0624	0.0559	0.1035	0	0	0.2625	0.3536	0.1966	0.3746	0.7032	0.8168	0.6506	0.7494	0.334	0.3448	0.2952	0.115	0.1666	0	0.0327	0	2.13995	1.34194	2.42958	0.74611	0	1.42163
ACOT4	NM_152331.4	chr14	73591872	73595766	+	1465	0.3358	0.2589	0.4115	0.2183	0.3439	0.2651	0.4214	0.2236	0	0	0	0	0	0	0	0	0.1514	0.2021	0.4369	0.2408	0.155	0.2069	0.4473	0.2465	0	0	0	0	0	0	0	0	0.768705	1.32612	1.22179	2.8668	0.648159	1.58005
ACOT6	NM_001365789.1	chr14	73610944	73619888	+	1037	0	0.233	0	0	0	0.1887	0	0	1.1186	1.2083	1.5507	0.9832	0	0	0	0	0	0.101	0	0	0	0.0818	0	0	1.1168	1.2396	1.3249	1.2082	0	0	0	0	233	101	0	0	0	0
ACOT7	NM_181864.3	chr1	6264271	6385768	-	1570	3.0603	3.5731	6.7225	4.7899	0.2396	0.1009	0.6317	0.1222	0.0602	0.0385	0.1076	0.2018	0.5598	0.2912	0.493	1.0373	6.3616	3.0821	4.5662	5.2182	0.514	0.2655	0.2037	0.4701	0.0728	0.1244	0.1237	0.2434	0.265	0.6631	0.9694	1.1038	1.16718	0.484409	2.19596	0.717663	1.56466	0.820136
ACOT8	NM_005469.4	chr20	45841720	45857392	-	1154	26.9463	37.0261	32.6065	27.779	28.4434	39.4413	33.0882	28.9459	0.1454	0.1466	0.1442	0.4786	n/a	n/a	n/a	n/a	30.6873	30.5184	25.2124	33.758	32.7095	32.1966	25.7335	35.7489	0.1369	0.3108	0.2222	0.5503	n/a	n/a	n/a	n/a	1.37402	0.994464	1.21001	0.821564	1.03086	1.10003
ACOT9	NM_001037171.2	chrX	23701054	23743276	-	4318	32.3953	25.3745	28.605	20.7469	1.3843	1.5521	1.7346	1.2774	0.4777	0.302	0.3685	0.3945	0.2239	0.1165	0.2572	1.0482	29.7482	24.0762	27.9434	21.5553	1.5603	1.9412	2.2298	2.2618	0.4393	0.2924	0.3621	0.3709	0.3534	0.1263	0.3386	0.3813	0.783253	0.809306	0.882971	0.939299	0.64041	0.724567
ACOX1	NM_007292.6	chr17	75941506	75979166	-	7317	75.4647	95.9571	76.3144	51.6271	3.2032	3.1576	2.3758	3.3596	0.1072	0.0681	0.0871	0.2556	35.59	31.801	45.5554	31.9721	83.1153	86.873	94.3536	63.0203	2.8578	3.2503	3.301	3.9389	0.1266	0.1176	0.0948	0.3356	30.8812	31.1803	49.1314	36.4715	1.27153	1.0452	1.01125	1.1352	0.684113	0.758218
ACOX2	NM_003500.4	chr3	58505135	58537190	-	2297	0	0	0.1028	0	0.5785	0.6815	0.9881	0.8268	0.4425	0.7625	0.6925	0.4482	0.0622	0	0	0.1213	0	0	0	0	0.5511	0.8375	1.0763	1.0975	0.4583	0.9252	0.7023	0.4899	0.1514	0.2105	0.2184	0.1784	0	0	102.8	0	0	0
ACOX3	NM_001375783.1	chr4	8366281	8428448	-	2894	16.1976	14.2925	13.0677	17.34	3.2512	2.8974	2.7469	3.0829	0.2356	0.1259	0.1206	0.2291	0	0.0388	0.0514	0.2183	11.7538	14.2991	13.7859	19.3476	2.049	2.6453	2.5182	3.3134	0.1908	0.1671	0.1473	0.2514	0.1514	0.0505	0.0764	0.0602	0.882329	1.21645	0.806718	1.17279	1.07046	1.64593
ACOXL	NM_001371254.1	chr2	110732572	111094344	+	2714	10.2635	9.2953	11.3528	9.4344	2.8397	2.4805	2.4584	2.6404	0.1753	0.1594	0.1562	0.1975	n/a	n/a	n/a	n/a	8.6336	9.2717	10.6617	15.7751	2.575	2.5705	2.4807	3.8868	0.1847	0.1553	0.1647	0.2279	n/a	n/a	n/a	n/a	0.905577	1.07378	1.10603	1.23476	0.919129	1.82696
ACOXL-AS1	NR_122074.1	chr2	111098340	111115588	-	3212	0	0	0	0	0	0.0967	0.064	0.1631	0	0	0.0109	0	n/a	n/a	n/a	n/a	0	0	0	0	0.1273	0.0943	0.1224	0.0937	0	0	0	0	n/a	n/a	n/a	n/a	0	0	0	0	0	0
ACP1	NM_007099.4	chr2	264946	278283	+	1474	24.707	30.7946	26.993	22.0572	9.1501	12.063	10.1182	7.4032	0.8419	0.7845	0.8185	1.5588	0.2799	0.6473	0.6002	1.4741	25.2647	26.4594	31.2861	26.8003	8.7511	10.7028	12.7122	8.7807	1.2392	0.8579	0.9587	1.5742	1.2496	0.6947	1.0377	1.2543	1.24634	1.04725	1.09248	1.23828	0.892715	1.06074
ACP2	NM_001357016.2	chr11	47239301	47248814	-	2111	68.1123	61.9863	55.8381	68.5304	36.032	29.7101	27.9227	36.883	1.4051	0.4288	0.4971	1.5345	n/a	n/a	n/a	n/a	71.4018	72.5823	61.3706	77.7117	36.4243	35.5907	30.4484	39.0187	0.9643	1.2527	0.9093	1.548	n/a	n/a	n/a	n/a	0.910047	1.01652	0.819783	0.859499	1.00612	1.08836
ACP3	NM_001134194.2	chr3	132317406	132368302	+	1787	3.5828	4.7383	3.3612	3.7999	1.9799	2.2294	1.7498	2.0003	0.0159	0.0265	0.0132	0.0282	0	0	0	0	1.8176	3.8148	2.2284	3.2915	0.6692	1.8987	0.9906	1.8518	0.0194	0.0291	0.0199	0.0244	0	0	0	0	1.32214	2.09766	0.937887	1.22534	1.0603	1.80991
ACP4	NM_033068.3	chr19	50790414	50795219	+	1342	0.4105	0.0776	0.1028	0.1747	11.8143	6.4752	7.0677	18.1928	5.6894	2.4998	2.981	8.6643	7.2544	6.5647	8.6103	15.3145	0.5452	0.2778	0.2621	1.0837	10.8477	12.3106	9.5477	19.3853	6.2926	6.2776	5.0235	11.4431	7.1189	11.6791	8.8438	11.5152	0.188578	0.508605	0.249818	0.479861	0.424544	1.98407
ACP5	NM_001611.5	chr19	11574659	11577645	-	1381	0	0	0	0.131	0	0	0	0.3809	0	0	0	0.1212	0	0	0.0532	0	0.1817	0.1515	0.1092	0	0.0848	0	0.2496	0.2419	0.0968	0.1416	0.071	0.0168	0	0	0	0	0	0.829228	0	0.597701	131	0
ACP6	NM_016361.5	chr1	147642229	147670524	-	6956	27.3942	35.2654	41.4327	22.0572	4.3896	5.3547	6.0777	2.9935	0.7789	0.6793	0.5984	0.6387	n/a	n/a	n/a	n/a	22.8716	28.5731	30.9365	22.1574	3.2789	4.3969	4.3864	2.9614	0.4402	0.6333	0.4171	0.4632	n/a	n/a	n/a	n/a	1.28728	1.24923	1.51241	1.35256	0.805148	0.968731
ACP7	NM_001004318.3	chr19	39084367	39111493	+	2903	11.4951	11.1078	13.9481	12.5355	0.5295	0.5132	0.655	0.5093	0.1581	0.0945	0.1871	0.0838	4.3666	2.887	3.9443	0.5241	9.2698	11.5454	12.1255	14.6779	0.4633	0.3471	0.7053	0.5208	0.0854	0.0775	0.1702	0.1209	3.6958	3.2084	2.7419	0.5017	0.966223	1.24535	1.21329	1.30792	1.09041	1.58324
ACR	NM_001097.3_2	chr22	50738203	50745339	+	1430	0	0	0	0	0	0	0	0	0	0	0.027	0	0	0	0	0.0655	0	0.0757	0	0	0	0.0095	0.0687	0	0	0.0175	0	0	0	0	0	0	0	75.7	0	0	0	0
ACRBP	NM_032489.3	chr12	6638074	6647432	-	1905	0.3732	0.0776	0	0	0.1904	0.0042	0	0	0.109	0.0597	0.069	0.0908	0	0	0	0	0.3332	0.101	0.0655	0.6021	0.2378	0.0214	0	0.1807	0.0367	0.0504	0.0131	0.0426	0	0	0	0	0.207376	0.302214	0	0.19599	0	1.80162
ACRV1	NM_020107.5	chr11	125671521	125680847	-	1771	0.5598	0.233	0.3429	1.0482	0	0.285	0.2643	0.4927	0.3038	0.1593	0.0878	0.4481	n/a	n/a	n/a	n/a	0.5755	0.7831	0.3495	0.1204	0.2871	0.3954	0.4045	0.2271	0.4319	0.4632	0.3216	0.494	n/a	n/a	n/a	n/a	0.415478	1.35837	0.611448	0.606245	1.86912	0.208846
ACSBG1	NM_015162.5	chr15	78167467	78234565	-	6215	0	0	0	0	0.0986	0.0309	0.1453	0.1944	0.1269	0.0848	0.0561	0.1297	n/a	n/a	n/a	n/a	0	0	0	0	0.0804	0.3254	0.2326	0.2826	0.0818	0.1111	0.0806	0.1343	n/a	n/a	n/a	n/a	0	0	0	0	0	0
ACSBG2	NM_001289177.2	chr19	6135666	6193091	+	2743	0	0	0	0	0.4453	0.1616	0.0825	0.4098	0.1455	0.1114	0.0833	0.0896	0	0	0	0.2402	0	0	0	0	0.2123	0.5124	0.352	0.1088	0.1369	0.0934	0.0998	0.0793	0.0605	0.1642	0.131	0.0802	0	0	0	0	0	0
ACSF2	NM_001288968.2	chr17	50426217	50474837	+	2252	37.5457	37.4662	32.172	33.5882	22.309	21.8379	19.063	19.4164	0.3368	0.3654	0.4093	0.6369	0.2799	0.0906	0.0685	0.4149	29.2332	35.9753	28.2929	30.7876	16.9819	21.4273	16.8497	18.9585	0.3136	0.5269	0.36	0.6069	0.0908	0.3789	0.2075	0.3411	0.997856	1.23059	0.856853	0.967801	0.894571	1.05314
ACSF3	NM_001243279.3	chr16	89093851	89156233	+	4095	24.2591	37.4403	39.1347	30.7054	6.8937	7.7109	7.5801	7.2034	0.4361	0.2278	0.2962	0.7321	0	0	0	0	27.0218	36.9522	40.2437	42.8565	7.7128	8.974	7.9376	8.7919	0.3507	0.4135	0.3313	0.7202	0.1817	0	0.1201	0.1204	1.54329	1.36745	1.61313	1.48925	1.26567	1.58594
ACSL1	NM_001381883.1	chr4	184755594	184805553	-	3773	1.3435	1.6571	0.9946	2.0528	0.0393	0.0272	0	0	0.0157	0.0134	0.0033	0.0638	0.0933	0	0	0	1.5752	1.1115	0.6991	2.1274	0.0896	0.0433	0	0.1464	0.0277	0.0449	0.0156	0.0495	0	0	0	0	1.2325	0.705177	0.739755	0.443535	1.52681	1.3497
ACSL3	NM_004457.5	chr2	222861035	222944639	+	5577	47.8838	43.8358	47.4349	35.379	8.1261	7.0224	8.1005	6.4929	0.5102	0.2293	0.3448	0.6392	2.3699	0.9191	1.732	3.0356	56.5479	47.7229	57.5691	43.8332	9.9653	8.3328	9.9926	7.6546	0.5153	0.4326	0.5564	0.6086	2.4083	2.5642	2.2248	2.4887	0.915443	0.843923	0.990605	1.01804	0.738836	0.775138
ACSL3-AS1	XR_923949.2	chr2	222917338	222919692	-	735	0.2612	0	0.926	0.3931	0.8027	0	0.6369	0.1657	0.0394	0.0959	0.6323	0.734	n/a	n/a	n/a	n/a	0.5755	0.6315	0.7865	0.7225	1.0231	0.3753	0.6126	0.2031	0.4897	0.6722	0.491	0.4656	n/a	n/a	n/a	n/a	0	1.0954	3.53166	1.36427	1.49924	1.25325
ACSL4	NM_022977.3	chrX	109641334	109733257	-	5200	11.1094	11.7292	12.8619	10.701	1.1551	1.506	1.6594	1.3071	0.1137	0.0709	0.0931	0.1564	0.1679	0.0388	0.0685	0.3494	11.0874	12.1265	11.2734	14.1695	1.332	1.5432	1.456	1.7076	0.0983	0.0947	0.1013	0.1644	0.0605	0.0884	0.0983	0	1.0557	1.09362	1.15765	1.01668	0.963152	1.27787
ACSL5	NM_203380.2	chr10	112375267	112428376	+	3374	55.908	24.7186	25.3466	38.7713	7.3668	2.3163	2.3057	7.3579	6.2634	1.639	1.5431	5.1405	n/a	n/a	n/a	n/a	64.0707	21.6003	21.105	35.3904	8.1816	2.8628	2.3064	6.0422	6.6955	1.6858	1.3023	4.6382	n/a	n/a	n/a	n/a	0.442122	0.337127	0.453355	0.329397	0.693472	0.552356
ACSL6	NM_001009185.3	chr5	131949972	132011658	-	6535	0.7091	1.2169	1.8178	0.9609	0	0.0275	0.05	0.0348	0.0213	0.057	0.0346	0.0356	0	0	0	0.0655	0.8482	1.3894	1.3764	0.8429	0.012	0.047	0.0232	0	0.028	0.0522	0.0493	0.0272	0	0	0	0	1.7137	1.63613	2.55992	1.62082	1.35319	0.992581
ACSL6-AS1	XR_246584.3	chr5	132001056	132007022	+	3458	0	0	0	0	0.3399	0.9097	0.5504	0.4736	0	0	0	0	n/a	n/a	n/a	n/a	0	0	0	0	0.3416	0.7999	0.7392	0.4352	0	0	0	0	n/a	n/a	n/a	n/a	0	0	0	0	0	0
ACSM1	NM_052956.3	chr16	20623234	20691256	-	2053	0	0	0	0	0	0	0	0	0.0398	0.0739	0.0262	0.0804	0	0	0	0	0	0	0	0	0	0	0	0	0.0144	0.0735	0.0221	0.0365	0	0.0505	0	0	0	0	0	0	0	0
ACSM2A	NM_001308954.2	chr16	20451520	20487669	+	3276	0	0	0	0	0	0	0	0	0	0	0	0	0	0	0	0	0	0	0	0	0	0	0	0	0	0	0	0	0	0	0	0	0	0	0	0	0	0
ACSM2B	NM_182617.4	chr16	20536225	20576367	-	2970	0	0	0	0	0	0	0	0	0	0	0	0	0	0	0	0	0	0	0	0	0	0	0	0	0	0	0	0	0	0	0	0	0	0	0	0	0	0
ACSM3	NM_005622.4	chr16	20764013	20797581	+	2533	7.4643	8.3373	4.7217	4.2804	2.0766	1.9209	0.8317	1.2601	0.0956	0.0913	0.0614	0.1139	n/a	n/a	n/a	n/a	6.7554	5.9622	4.02	3.2513	2.341	1.8742	1.2269	1.096	0.0922	0.0795	0.0517	0.031	n/a	n/a	n/a	n/a	1.11681	0.882452	0.632486	0.594991	0.573373	0.481218
ACSM4	NM_001080454.1	chr12	7304331	7328373	+	1743	0	0	0	0	0	0.0846	0	0.1428	0.01	0.0247	0.0092	0.0211	n/a	n/a	n/a	n/a	0	0	0	0	0.1577	0	0.0411	0	0.0141	0	0.0117	0.0081	n/a	n/a	n/a	n/a	0	0	0	0	0	0
ACSM5	NM_001324372.2	chr16	20409533	20441336	+	2780	0	0.1035	0	0	0	0	0	0	0	0.0093	0	0	0	0	0	0	0	0	0	0	0	0	0	0	0	0.0091	0	0	0	0	0	0	103.5	0	0	0	0	0
ACSM6	NM_207321.3	chr10	95194237	95228929	+	1675	0	0	0	0	0	0	0	0.3551	0	0	0.0093	0.0494	1.356	0.5696	1.0632	2.4241	0	0	0	0	0	0.0678	0.0782	0.5316	0	0.0091	0.0039	0.0386	1.3278	0.4757	0.7537	2.3883	0	0	0	0	0	0
ACSS1	NM_032501.4	chr20	25006236	25058139	-	3632	1.6421	0	0	1.354	0	0.0326	0	0	0.0545	0.0104	0.0117	0.0665	0	0	0	0	1.7267	0	0	1.7661	0.0375	0	0	0.0404	0.0593	0.0282	0	0.0755	0	0	0	0	0	0	0	0	0.824052	1.02223
ACSS2	NM_001076552.3	chr20	34876611	34927959	+	2924	17.8025	21.1281	25.2437	18.563	6.3947	7.1413	9.6186	7.1037	0.1842	0.1749	0.1757	0.283	0	0	0	1.8017	16.7523	19.554	22.3722	19.0934	6.1339	7.1086	8.4255	7.544	0.2154	0.2193	0.2045	0.2033	1.3632	0.9473	0.7373	0	1.18674	1.16717	1.41791	1.33539	1.04266	1.13968
ACSS3	NM_001330243.2	chr12	81078078	81261210	+	8442	0	0	0	0	0	0.0138	0	0.062	0	0.0015	0.0011	0.001	n/a	n/a	n/a	n/a	0	0	0	0	0	0.0134	0	0.0713	0	0	0.0009	0.001	n/a	n/a	n/a	n/a	0	0	0	0	0	0
ACTA1	NM_001100.4	chr1	229431244	229434094	-	1491	0.6344	0.1035	0.1371	0.3057	0.045	0	0	0.1138	0.2663	0	0	0.3572	0	0	0	0.0655	0.5452	0.3536	0.6554	1.2443	0.0246	0.0968	0.1	0	0.1735	0.3677	0.1724	0.443	0	0	0	0	0.16289	0.647382	0.21577	1.19993	0.481114	2.2781
ACTA2	NM_001613.4	chr10	88935073	88952773	-	1349	0	0	0	0	0.3643	0.3817	0.1132	0.1704	0.0684	0.0498	0.0251	0.048	n/a	n/a	n/a	n/a	0	0	0	0	0.3139	0.3005	0.1049	0.1325	0.0083	0.0372	0.024	0.0626	n/a	n/a	n/a	n/a	0	0	0	0	0	0
ACTA2-AS1	NR_125373.1	chr10	88932683	88939974	+	2043	0.2985	0.2071	0.1371	0.3494	0.7998	1.1657	0.4751	0.7055	0.0833	0.0716	0.0079	0.0998	n/a	n/a	n/a	n/a	0.3938	0.3031	0.131	0.1204	0.6663	0.7454	0.4971	0.5599	0.0176	0.0275	0.0375	0.0917	n/a	n/a	n/a	n/a	0.691486	0.76773	0.457763	0.331814	1.16661	0.304965
ACTB	NM_001101.5	chr7	5527147	5530601	-	1812	44.3756	48.4705	50.1902	44.5076	23.1534	25.0356	25.3797	20.9967	14.4518	15.0659	16.7229	19.163	7.2217	4.1557	6.1337	9.8493	50.1357	50.1145	56.5131	46.4423	25.933	26.0504	28.5352	21.92	16.4395	16.7317	18.6549	18.9983	6.9372	7.1285	5.8989	9.6938	1.09225	0.999557	1.13101	1.12718	1.00295	0.926313
ACTBL2	NM_001017992.4	chr5	57480017	57482811	-	2794	0.1492	0	0	0	0.0801	0	0	0	0	0	0	0	0	0	0	0	0	0	0	0	0	0	0	0	0	0	0	0	0	0	0	0	0	0	0	0	0	0
ACTC1	NM_005159.5	chr15	34790229	34795549	-	1382	0	0	0	1.0773	0	0	0	0.146	0	0	0	0.2997	0	0	0	0	0	0	0	2.1274	0	0	0	0.2492	0	0	0	0.5603	0	0	0	0	0	0	0	0	1077.3	2127.4
ACTE1P	NR_038862.1	chr11	71405745	71423354	-	2162	0	0	0	0	0	0	0	0	0	0	0	0	0	0	0	0	0	0	0	0	0	0	0	0	0	0	0	0	0	0	0	0	0	0	0	0	0	0
ACTG1	NM_001199954.3	chr17	81509970	81512799	-	2038	124.543	136.108	123.738	123.433	85.0259	91.2992	79.7823	78.663	19.1815	11.4031	19.9317	41.152	13.6722	6.7579	9.1348	19.3128	149.7	120.549	136.243	128.944	102.951	80.9884	90.4108	84.3515	14.2816	13.3556	15.6724	33.6432	10.1432	9.9706	8.8775	17.6818	1.09285	0.805266	0.993528	0.9101	0.991083	0.861342
ACTG1P17	NR_036446.1	chr15	82725879	82739780	-	1670	0.2985	0.0776	0	0.3494	0	0	0	0.0364	0.0961	0.0095	0	0.1257	0	0	0	0	0	0.2526	0	0.2809	0.2176	0	0.0082	0.0151	0.0148	0.0402	0.039	0.1062	0	0	0.0291	0	0.259098	252.6	0	0	1.16661	280.9
ACTG1P20	NR_033926.1	chr1	27323873	27326525	+	2652	0.1492	0.2071	0.3429	1.1356	0.6772	0.1732	0.3806	0.5588	0	0	0	0	n/a	n/a	n/a	n/a	0.2423	0.3284	0.1747	1.6457	0.2227	0.1528	0.2347	0.8995	0	0	0	0	n/a	n/a	n/a	n/a	1.37883	1.34977	2.28296	0.718044	7.56059	6.76408
ACTG1P25	NR_002929.2	chr1	202861753	202875241	+	2321	24.5577	21.1799	11.2499	12.0987	1.0279	0.9787	0.8279	0.8465	2.034	2.1507	1.9429	1.6923	0.3667	0.3348	0.2128	0.2711	14.1167	19.2508	10.4578	13.7279	0.8275	0.9002	0.6665	0.7686	2.3205	1.8443	1.786	1.4303	0.188	0.4181	0.4972	0.4982	0.862419	1.36359	0.458082	0.740758	0.492644	0.972389
ACTG1P4	NR_024438.2	chr1	103569403	103571391	+	1988	0	0	0	0	0	0	0	0	0	0	0	0	n/a	n/a	n/a	n/a	0	0	0	0	0	0	0.0439	0	0	0	0	0	n/a	n/a	n/a	n/a	0	0	0	0	0	0
ACTG2	NM_001615.4	chr2	73893007	73919865	+	1501	0	0	0	0	0	0	0	0	0.0088	0.0168	0	0	0.8957	0.8026	1.2004	0.6333	0	0	0	0	0	0	0	0	0.0197	0.0104	0.0038	0	1.1208	0.8463	0.7755	1.1038	0	0	0	0	0	0
ACTL10	NM_001024675.2	chr20	33666942	33668525	+	1583	0.7091	0.1553	0.2057	0.9172	0.6365	0.288	0.2275	0.6622	0	0	0	0	n/a	n/a	n/a	n/a	0.2726	0.9094	0.4588	1.3246	0.4808	1.1011	0.3881	1.9679	0	0	0	0	n/a	n/a	n/a	n/a	0.218702	3.32383	0.289678	1.6769	1.29165	4.84137
ACTL6A	NM_178042.4	chr3	179562925	179588407	+	1902	55.6343	48.4446	41.6385	39.2517	24.4902	20.4451	17.6954	17.8852	1.3737	1.0339	0.9742	1.3507	n/a	n/a	n/a	n/a	46.6217	43.0154	46.8199	40.3811	22.0762	18.2208	19.4619	18.7149	1.1336	1.1856	1.1642	0.9698	n/a	n/a	n/a	n/a	0.870753	0.922628	0.748419	1.00423	0.705518	0.866125
ACTL6B	NM_016188.5	chr7	100643096	100656448	-	1524	0	0	0	0	0	0.0397	0	0	0	0.0047	0	0	1.1196	0.2774	0.2204	0	0	0	0	0	0.0596	0.0193	0.0322	0	0.0499	0.0263	0.0374	0	0.9737	0.4872	0.1872	0	0	0	0	0	0	0
ACTL7A	NM_006687.4	chr9	108862265	108863756	+	1491	0.3358	0.0776	0	0.4367	0.3379	0	0	0.645	0	0	0	0	0.1866	0.2589	0.2572	0.5459	0	0.1768	0	0	0.1219	0.3304	0.1758	0.2116	0	0	0	0	0.3029	0.3663	0.273	0.3211	0.230404	176.8	0	0	1.29662	0
ACTL7B	NM_006686.4	chr9	108854587	108855986	-	1399	0	0	0	0	0	0	0	0	0	0	0	0	0	0	0	0	0	0.101	0	0	0	0	0	0	0	0	0	0	0	0	0	0	0	101	0	0	0	0
ACTL8	NM_030812.3	chr1	17755332	17827063	+	1841	0.1492	0.1294	0.3429	0	0.2347	0.2826	0.19	0	0.0496	0.0233	0.0051	0.0084	0	0	0	0	0.1514	0.3789	0.284	0.2809	0.0839	0.4775	0.1573	0.1556	0.0344	0.0202	0.0112	0.0206	0	0	0	0	0.861518	2.48622	2.28296	1.86352	0	1.84318
ACTL9	NM_178525.5	chr19	8697399	8698795	-	1396	0	0	0	0	0	0	0	0	0	0	0	0	0.1492	0.466	0.4287	0.3057	0	0	0	0	0	0	0	0	0	0	0	0	0.2423	0.5684	0.0873	0.3813	0	0	0	0	0	0
ACTN1	NM_001130004.2	chr14	68874127	68979302	-	3722	106.616	93.7131	115.998	83.0751	42.8772	36.9804	39.9829	32.4214	0.5109	0.5111	0.6347	0.6516	0.6904	0.3236	0.24	1.4632	97.02	90.0394	92.7223	84.8165	39.7324	35.8848	34.2252	32.2862	0.627	0.6004	0.7103	0.6857	0.6664	0.7326	0.6117	1.1239	0.87897	0.92804	1.08799	0.955693	0.779192	0.874208
ACTN1-AS1	NR_073422.1	chr14	68979681	68987463	+	599	101.54	84.7285	103.547	77.3096	2.6617	2.5909	4.1622	3.8577	0.0238	0.0159	0.0426	0.101	0.3545	0.3624	0.2915	0.3931	91.0825	83.8498	82.2134	79.1969	1.5376	1.6372	2.7218	2.5591	0.0204	0.0414	0.0645	0.0629	0.1817	0.2273	0.4151	0.2408	0.834425	0.920582	1.01976	0.902616	0.761362	0.869498
ACTN2	NM_001278344.2	chr1	236686498	236764631	+	5069	0	0	0	0	0.0667	0	0	0	0.0451	0.0297	0.0049	0.0125	0	0	0	0	0	0	0	0	0	0	0	0	0.0366	0.0383	0.0116	0.0115	0	0	0	0	0	0	0	0	0	0
ACTN3	NM_001258371.3	chr11	66546394	66563334	+	3092	22.505	30.1387	30.8001	24.8381	0.1843	0.0429	0.1823	0.7572	0.0282	0	0	0	n/a	n/a	n/a	n/a	24.6589	25.4825	35.8741	29.1418	0.3136	0.3073	0.2263	0.5947	0.0232	0.0082	0	0.013	n/a	n/a	n/a	n/a	1.33914	1.03336	1.36853	1.45475	1.10362	1.18175
ACTN4	NM_001322033.2_2	chr19	38647648	38731589	+	4975	39.3371	58.6376	42.1529	23.1492	10.3249	15.3774	9.5548	6.6238	1.3779	1.0146	1.7437	2.1929	n/a	n/a	n/a	n/a	55.9824	47.2176	59.732	26.0912	14.5636	11.7225	13.4778	6.502	1.6005	1.2328	1.8654	2.0848	n/a	n/a	n/a	n/a	1.49061	0.843421	1.07155	1.06696	0.588468	0.466052
ACTR10	NM_018477.3	chr14	58200148	58235636	+	2408	44.6742	46.4768	55.8381	38.7421	6.2957	6.094	4.3876	5.4426	0.1273	0.0921	0.1084	0.1515	0.0559	0.0388	0.24	0.0655	48.1364	48.8345	41.1395	64.8667	7.4606	5.4438	5.2807	7.0627	0.1721	0.1434	0.1421	0.1759	0.3938	0.2821	0.0983	0.1404	1.04033	1.01448	1.24987	0.854627	0.867195	1.34753
ACTR1A	NM_005736.4	chr10	102479228	102502712	-	2830	27.0583	33.4529	34.4015	25.6388	6.873	7.6721	8.1296	7.5867	1.47	1.2686	1.3961	1.3368	n/a	n/a	n/a	n/a	27.9003	25.4657	26.4723	31.5904	6.8054	7.314	6.2186	8.3354	1.5316	1.4418	1.4107	1.8126	n/a	n/a	n/a	n/a	1.23628	0.912707	1.27134	0.948784	0.947504	1.13222
ACTR1B	NM_005735.4	chr2	97655938	97664044	-	2204	44.6244	46.7961	45.3656	33.6901	5.522	7.2908	7.9366	5.1304	2.8471	2.3621	2.5872	2.8596	0.5411	0.5696	0.5487	1.2448	48.9341	43.2849	48.4148	43.0438	5.3728	6.2633	8.3712	7.2615	2.3055	2.4996	2.5622	3.2777	1.1814	0.821	0.8192	1.4851	1.04864	0.884537	1.01659	0.989368	0.754953	0.87961
ACTR2	NM_001005386.3	chr2	65227830	65271253	+	3798	37.384	48.2116	50.0759	42.018	2.3815	2.446	2.3159	1.7917	0.4189	0.2837	0.3034	0.6202	0.4665	0.1035	0.3601	0.5896	42.7744	44.9018	41.9478	54.7781	2.2836	2.0306	1.9271	1.9857	0.4491	0.3669	0.3531	0.4832	0.3786	0.3536	0.4551	0.8964	1.2896	1.04971	1.33947	0.980652	1.12393	1.2806
ACTR3	NM_005721.5	chr2	113890088	113962596	+	6589	43.9651	40.6942	38.6545	30.0939	1.2852	0.9731	0.9957	1.5705	0.1924	0.1257	0.2102	0.2972	0.8397	0.2977	0.7031	1.2229	42.6027	37.7185	40.1563	32.0855	1.5577	1.1422	1.8378	1.7682	0.4288	0.2334	0.2556	0.3128	1.348	0.7831	1.0923	1.1439	0.925581	0.885334	0.879189	0.942554	0.68448	0.753115
ACTR3-AS1	NR_110174.1	chr2	113831182	113890992	-	590	7.3897	6.9391	7.9572	6.0712	2.9566	1.6562	1.4126	0.0266	1.3589	1.1551	1.1499	1.0016	0	0	0	0	9.6939	6.4422	8.3895	9.0984	3.5397	0.9454	1.7374	1.2695	1.3515	1.1189	1.198	1.0129	0	0	0	0	0.938896	0.664494	1.07665	0.865352	0.821465	0.938473
ACTR3B	NM_001350942.2	chr7	152759751	152855378	+	2339	33.5523	40.979	40.5066	25.5515	9.9921	13.1176	13.5082	7.9157	0.1923	0.1358	0.1455	0.2529	0	0	0	0	33.3834	36.3543	46.7762	30.5468	10.8514	10.733	16.4587	9.1934	0.1484	0.1328	0.1687	0.1992	0	0	0	0	1.22131	1.08896	1.20723	1.40114	0.76152	0.915002
ACTR3BP2	NR_027714.1	chr2	91941132	91942470	+	1338	0	0	0	0	0	0	0	0	0	0	0	0	0	0	0	0	0	0	0	0	0	0	0	0	0	0	0	0	0	0	0	0	0	0	0	0	0	0
ACTR3BP5	NR_045000.1	chr10	38696595	38698241	+	1646	0	0	0	0	0	0	0	0	0	0	0	0	0	0	0	0	0	0	0	0	0	0	0	0	0	0	0	0	0	0	0	0	0	0	0	0	0	0
ACTR3C	NM_001351027.2	chr7	149881359	150047715	-	8045	0	0	0	0.131	0.6123	0.642	0.1598	0.5163	0.0399	0.0138	0.0155	0.0241	0.5598	0	0	0	0	0	0.0873	0	0.401	0.523	0.2457	0.3218	0.0287	0.0175	0.0184	0.0235	0.2726	0.2273	0	0.4816	0	0	0	87.3	131	0
ACTR5	NM_024855.4	chr20	38748459	38772520	+	2547	18.213	20.4549	24.3863	21.9262	5.2101	5.9997	6.3563	6.5575	0.3816	0.3344	0.5729	0.4926	0.2239	0.1294	0	0	16.0555	20.6235	20.7554	26.9743	3.8701	6.1677	5.5183	8.9977	0.3395	0.4784	0.4218	0.4843	0.1363	0.1136	0.1529	0.0602	1.12303	1.28443	1.33888	1.29265	1.20381	1.67996
ACTR6	NM_022496.5	chr12	100200814	100224424	+	1737	13.7344	10.5382	6.6196	6.901	6.7266	6.2014	2.9769	3.2773	0.3395	0.1617	0.1541	0.2843	0.4105	0.1683	0.2743	0.4804	15.7425	9.777	8.0618	7.1851	7.5964	5.5235	4.4235	4.3384	0.4605	0.2213	0.1637	0.2	0.3938	0.7705	0.5498	0.3612	0.767229	0.621018	0.481937	0.512072	0.502424	0.456385
ACTR8	NM_022899.5	chr3	53867065	53882152	-	3579	21.0121	19.005	18.8985	16.1898	4.8193	3.713	3.7039	3.6277	0.8928	0.7115	0.6829	0.7918	n/a	n/a	n/a	n/a	19.9937	18.1392	17.2598	17.5011	4.4358	3.6962	3.3046	3.1484	0.7384	0.6884	0.8845	0.9732	n/a	n/a	n/a	n/a	0.904436	0.9072	0.899368	0.863219	0.770462	0.875287
ACTRT1	NM_138289.4	chrX	128050961	128052403	-	1442	0	0	0	0	0	0	0	0	0	0	0	0	0	0	0	0	0	0	0	0	0	0	0	0	0	0	0	0	0	0	0	0	0	0	0	0	0	0
ACTRT2	NM_080431.5	chr1	3021466	3022903	+	1437	0	0	0	0	0	0	0	0	0	0	0	0	0	0	0	0	0	0	0	0	0	0	0	0	0	0	0	0	0	0	0	0	0	0	0	0	0	0
ACTRT3	NM_032487.5	chr3	169766920	169769561	-	1671	17.8025	22.3969	19.7559	13.409	6.746	9.5041	7.9234	5.2781	1.1081	1.9779	1.3153	0.824	13.809	8.9328	12.195	11.8294	19.6201	17.8613	22.4814	15.0124	7.9409	7.9405	11.0214	7.0007	1.2929	1.6408	1.9325	1.0552	10.2997	9.1159	7.9562	9.6559	1.25801	0.910311	1.10966	1.14578	0.753167	0.765115
ACVR1	NM_001347667.2	chr2	157736445	157838630	-	3306	5.5609	5.2561	4.0129	5.5907	0.5638	0.3312	0.1882	0.5152	0.0474	0.0143	0.0228	0.0547	0.0559	0	0	0	4.2915	3.8148	2.5998	4.2147	0.4205	0.2032	0.2726	0.4462	0.0422	0.0377	0.0361	0.0515	0	0	0.0546	0	0.945019	0.888713	0.721498	0.605661	1.00518	0.981875
ACVR1B	NM_020328.4	chr12	51951698	51997078	+	4654	6.9418	8.5185	8.8833	7.862	0.9635	1.1431	1.2445	0.8683	0.1951	0.126	0.1401	0.2679	0.2052	0.0388	0	0.5241	6.7857	7.7559	9.3727	11.3998	1.004	1.2781	1.5136	1.3405	0.2998	0.2165	0.1428	0.3296	0.0807	0.2147	0.0873	0.1404	1.22695	1.14281	1.2795	1.38104	1.1324	1.67973
ACVR1C	NM_145259.3	chr2	157526766	157628864	-	8853	5.1877	5.1266	8.6089	7.9056	0.1414	0.0971	0.2552	0.2642	0.0038	0.0054	0.0116	0.0014	0	0	0	0	3.9381	5.7348	6.3795	10.6773	0.1169	0.2058	0.2072	0.2716	0.001	0.0061	0.0051	0.0154	0	0	0	0.0602	0.988032	1.45587	1.65916	1.61953	1.52362	2.71059
ACVR2A	NM_001278579.2	chr2	147844516	147930822	+	5359	42.9947	47.5556	41.5127	36.733	4.2001	4.3793	4.5317	4.9953	0.1412	0.0991	0.0758	0.1722	n/a	n/a	n/a	n/a	34.7365	37.9627	36.1946	42.8029	3.3879	3.9451	2.8315	5.2629	0.161	0.1554	0.0988	0.1697	n/a	n/a	n/a	n/a	1.10605	1.09284	0.965508	1.04195	0.854341	1.23218
ACVR2B	NM_001106.4	chr3	38453889	38493142	+	11782	7.6509	11.781	10.7697	7.7746	0.6202	0.8848	0.8972	0.5896	1.2917	1.5741	1.1154	0.997	0.5598	0.3001	0.4677	0.5658	7.4219	9.5496	8.3895	7.9477	0.74	0.7787	0.7253	0.6262	1.1893	1.1734	1.0648	0.8769	1.136	0.6028	0.7746	0.9487	1.53962	1.28651	1.40745	1.13022	1.01604	1.0707
ACVR2B-AS1	NR_028389.1	chr3	38451026	38454820	-	2517	18.0637	26.9021	17.6637	13.278	1.5724	1.901	0.9153	1.582	8.3426	12.6461	12.2161	8.0764	n/a	n/a	n/a	n/a	16.207	18.0129	16.7791	13.6075	1.151	1.3956	0.9049	0.9678	8.1927	10.3418	9.4773	8.5501	n/a	n/a	n/a	n/a	1.48921	1.11136	0.977802	1.03524	0.735025	0.839555
ACVRL1	NM_000020.3	chr12	51907503	51923361	+	4177	0	0	0	0	0.133	0.0584	0.0286	0.1929	0.1824	0.1619	0.1659	0.0992	0.3732	0.5307	0.7545	0.4586	0.1211	0	0	0	0.1256	0.0526	0.1043	0.0919	0.0834	0.1141	0.1266	0.1157	0.7118	0.5684	0.6772	0.7827	0	0	0	0	0	0
ACY1	NM_000666.3	chr3	51983534	51989197	+	1422	37.2098	50.4901	47.0805	30.6181	5.8506	9.7776	9.4404	6.4668	1.1589	1.1802	1.5412	1.7708	4.7398	2.7489	3.1097	6.2896	34.1609	45.9797	45.4362	33.758	7.9919	9.2547	9.5109	8.4654	1.5616	2.0052	1.5579	3.1324	3.8472	4.9011	3.7942	6.8037	1.35687	1.34594	1.26524	1.33003	0.822828	0.988177
ACY3	NM_080658.2	chr11	67642554	67650730	-	1371	13.0999	13.8265	7.8543	16.3354	2.9057	2.9864	1.898	4.3696	0.9644	1.5774	0.7954	0.8487	0	0	0	0	9.6131	12.3791	8.892	12.8449	2.267	2.5711	2.005	3.1989	0.8373	1.5981	1.0271	0.8968	0	0	0	0	1.05539	1.2876	0.599524	0.924892	1.24689	1.33605
ACYP1	NM_001302617.2	chr14	75053242	75069490	-	790	28.5511	31.3039	41.124	25.8135	37.6976	42.8596	56.9593	32.1952	1.7928	1.6517	1.5509	1.9323	0.1679	0.8544	0.5659	1.3103	27.4964	30.3415	35.612	29.0616	36.9538	40.36	49.6409	37.1834	1.5507	1.7099	1.5532	2.0298	1.4086	1.1747	1.1797	0.7225	1.09638	1.10343	1.44031	1.2951	0.904084	1.05689
ACYP2	NM_001320586.2	chr2	53971112	54305300	+	1262	46.7144	53.0966	57.4844	45.0754	12.4038	12.1799	12.9528	12.6303	0.354	0.3606	0.3679	0.2658	0	0	0	0	45.0767	47.5966	53.032	47.7268	11.6149	11.8208	13.892	13.8818	0.3372	0.295	0.3212	0.2489	0	0	0	0	1.1366	1.05588	1.23052	1.17646	0.964894	1.05877
ADA	NM_000022.4	chr20	44619521	44651699	-	1496	30.9397	37.518	42.5988	32.7583	14.9439	18.8683	22.983	13.5907	0.1383	0.2143	0.1558	0.5373	0	0	0	0.4913	21.1145	32.91	31.439	41.5452	10.0536	19.4553	17.868	22.9757	0.1121	0.2275	0.2031	0.4158	0.4544	0.3789	0.8192	1.2042	1.21258	1.55857	1.37679	1.48891	1.05874	1.96752
ADA2	NM_001282225.2	chr22	17178789	17219435	-	4355	0	0	0	0	0	0.0624	0.0063	0	0.0226	0.0203	0.0219	0.0433	0	0	0	0	0	0	0	0	0	0.0348	0.0225	0	0.0212	0.0121	0.0147	0.0398	0	0	0	0	0	0	0	0	0	0
ADAD1	NM_139243.4	chr4	122379010	122429784	+	1963	0	0	0	0	0	0	0	0	0	0.0031	0	0	0	0	0	0	0	0	0	0	0	0	0	0	0	0	0	0	0	0	0	0	0	0	0	0	0	0
ADAD2	NM_139174.4	chr16	84191156	84197166	+	2264	0	0	0	0	0	0	0	0	0	0	0	0	0	0	0	0.0655	0	0	0	0	0	0	0	0	0	0	0	0	0	0	0	0	0	0	0	0	0	0
ADAL	NM_001324364.2	chr15	43330350	43349415	+	1747	27.3195	22.6558	24.1119	21.5768	8.0327	7.7074	7.6406	5.8762	1.1696	0.8854	1.0577	0.9866	0.0497	0.0776	0	0.2839	25.5071	20.994	22.394	23.2011	8.6323	6.8704	7.7967	7.6681	1.0183	0.8868	0.7775	0.9943	0.1817	0.1136	0.0327	0.0802	0.82926	0.823033	0.882557	0.877917	0.789766	0.909558
ADAM10	NM_001110.4	chr15	58588808	58749707	-	11158	22.2064	26.3325	24.009	17.9515	0.6235	0.9051	0.8001	1.0483	0.1735	0.144	0.1284	0.3496	0.2799	0.22	0.2915	0.9172	23.1745	20.6403	20.4495	18.7455	0.6414	0.75	0.6412	0.9008	0.1911	0.203	0.1676	0.2361	1.2218	0.821	0.5025	0.582	1.18575	0.890609	1.08113	0.882376	0.808357	0.80885
ADAM11	NM_001318933.2	chr17	44758987	44781846	+	4610	7.8002	8.1561	11.49	8.4734	5.6939	5.6453	7.0484	5.8658	0.8088	0.7574	0.7604	0.8065	0.1866	0.0906	0.1886	0.677	5.7557	8.8422	9.8752	10.316	5.1678	6.5801	6.486	6.7083	0.7579	0.7953	0.8222	0.9388	0.1363	0.2652	0.3167	0.5017	1.04549	1.53598	1.47285	1.71543	1.08617	1.792
ADAM12	NM_003474.6	chr10	126012390	126388477	-	7950	0	0	0	0	0	0	0	0	0.0184	0.0168	0.0097	0.0227	0	0	0	0	0	0	0	0	0	0.0153	0.0021	0	0.0245	0.014	0.0085	0.0212	0	0	0	0	0	0	0	0	0	0
ADAM15	NM_001261464.2	chr1	155051315	155062775	+	2819	26.5731	28.8182	36.4251	31.3606	3.9654	3.4292	4.5125	4.0334	0.3914	0.2881	0.4655	0.9102	n/a	n/a	n/a	n/a	23.1745	33.3479	35.3061	38.8157	2.7799	4.3069	3.6815	5.5896	0.3843	0.712	0.4917	0.9326	n/a	n/a	n/a	n/a	1.08445	1.43893	1.3707	1.52342	1.18012	1.67486
ADAM17	NM_003183.6	chr2	9488485	9555830	-	4391	31.0517	37.6216	37.877	30.7928	2.49	2.9661	3.2478	2.9154	0.1688	0.1019	0.123	0.2239	n/a	n/a	n/a	n/a	33.3228	32.7163	34.6943	29.3425	3.3888	2.8633	3.201	3.0756	0.2879	0.1856	0.1833	0.2445	n/a	n/a	n/a	n/a	1.21154	0.98177	1.21977	1.04113	0.99163	0.880527
ADAM18	NM_014237.3_2	chr8	39584567	39730065	+	2400	0	0	0	0	0	0	0	0	0.0031	0.0035	0.001	0	0	0	0	0	0	0	0	0	0	0	0	0	0.012	0.0031	0.0027	0.0033	0	0	0	0	0	0	0	0	0	0
ADAM19	NM_033274.5	chr5	157477303	157575775	-	6481	15.6627	6.5766	21.9854	14.501	1.1686	0.3436	1.6169	1.0183	0.2117	0.1212	0.2189	0.3247	0.627	0.0466	0.2469	0.891	10.4815	7.2506	13.4145	17.2202	0.782	0.4729	1.1892	1.0909	0.223	0.1228	0.249	0.2175	0.1817	0.0606	0.249	0.6021	0.419862	0.691686	1.40359	1.2797	0.925771	1.64276
ADAM2	NM_001464.5_2	chr8	39743734	39838227	-	2610	0	0	0	0	0	0	0	0	0.0016	0	0	0	0	0	0	0	0	0	0	0	0	0	0	0	0.0014	0.0016	0	0	0	0	0	0	0	0	0	0	0	0
ADAM20	NM_003814.5	chr14	70522357	70535004	-	2784	0	0	0	0	0	0	0	0	0	0	0	0	0	0	0	0	0	0.0757	0	0	0.0816	0.0408	0	0	0	0.0153	0	0	0	0	0	0	0	75.7	0	0	0	0
ADAM20P1	NR_037933.1	chr14	70468875	70483756	-	3039	0	0	0	0	0	0	0	0	0	0	0	0	0	0	0	0	0	0	0	0	0	0	0	0	0	0	0	0	0.0454	0	0.0327	0	0	0	0	0	0	0
ADAM21	NM_003813.4	chr14	70452173	70459905	+	2647	0	0	0	0	0	0	0	0	0	0	0	0	0	0	0	0	0	0	0	0	0	0	0	0	0	0.0223	0	0	0	0	0.0327	0	0	0	0	0	0	0
ADAM21P1	NR_003951.1	chr14	70245752	70247801	-	2049	0	0	0	0	0	0	0	0	0	0	0	0	0	0	0	0	0	0	0	0	0	0	0.0479	0	0	0	0	0	0	0	0	0	0	0	0	0	0	0
ADAM22	NM_001324418.2	chr7	87934250	88202889	+	9508	49.4887	48.6086	49.8244	45.9635	5.7328	5.7044	6.0035	6.4531	0.0337	0.0196	0.0233	0.0388	0.1526	0.2824	0.5846	0.6849	40.3812	48.405	37.7676	55.4739	4.9512	5.7749	4.4897	6.8645	0.0381	0.0354	0.0206	0.0217	1.0946	1.1024	0.566	1.0947	0.982196	1.19867	1.00676	0.935254	0.928749	1.37372
ADAM23	NM_003812.4	chr2	206443531	206621127	+	6334	0	0	0	0	0	0	0	0	0.0052	0.0022	0.0015	0.0015	0	0	0	0	0	0	0	0	0	0	0	0	0.0026	0.0015	0.0021	0.0035	0	0	0	0	0	0	0	0	0	0
ADAM28	NM_014265.6	chr8	24294068	24359014	+	7019	0.1492	2.2526	0.2743	0.1747	0.0102	0.1624	0.0187	0.0326	0	0.0063	0.0097	0.0257	0	0	0	0	0.4241	1.4147	0.2184	0	0.0329	0.092	0.0149	0	0.0024	0.0073	0.0084	0.027	0	0	0	0	14.9973	3.32792	1.82623	0.513761	1.16312	0
ADAM29	NM_001278126.1	chr4	174918357	174978180	+	3379	0	0	0	0	0	0	0	0	0.0039	0.0048	0.0045	0	0	0	0	0	0	0	0	0	0	0	0	0	0	0.0067	0.004	0	0	0	0	0	0	0	0	0	0	0
ADAM30	NM_021794.4	chr1	119893532	119896515	-	2983	0	0	0	0	0	0	0	0	0	0	0	0	0	0	0	0	0	0	0	0	0	0	0	0	0	0	0	0	0	0	0	0	0	0	0	0	0	0
ADAM32	NM_001313994.1_2	chr8	39107528	39284917	+	2331	1.866	0.6214	1.9207	2.3149	0.1198	0.0666	0.3034	0.2574	0.0706	0.0283	0.0559	0.0699	0	0	0	0	1.9084	1.5158	2.141	1.7929	0.2128	0.0321	0.3679	0.5631	0.0738	0.0536	0.0591	0.0618	0	0	0	0	0.332833	0.793862	1.02876	1.12129	1.2399	0.938986
ADAM33	NM_025220.5	chr20	3667974	3682010	-	3436	0	0	0	0	0.0723	0.0299	0.0203	0	0.2247	0.3017	0.2846	0.1977	0	0	0	0	0	0	0	0	0	0.0149	0.0448	0	0.2443	0.2811	0.4925	0.1249	0	0	0	0	0	0	0	0	0	0
ADAM3A	NR_073423.1	chr8	39451044	39522989	-	2768	0	0	0	0	0	0	0	0	0	0	0	0.0028	0	0	0	0	0	0	0	0	0	0	0	0	0	0	0	0	0	0	0	0	0	0	0	0	0	0
ADAM3B	NR_144553.1	chr16	49517645	49518585	-	940	0	0	0	0	0	0	0	0	0	0	0	0	n/a	n/a	n/a	n/a	0	0	0	0	0	0	0	0	0	0	0	0	n/a	n/a	n/a	n/a	0	0	0	0	0	0
ADAM5	NR_001448.1_2	chr8	39314662	39417226	+	1718	0	0	0	0	0	0	0	0	0.0048	0.0019	0.0023	0.0019	0	0	0	0	0	0	0	0	0	0	0	0	0.0036	0	0.0007	0	0	0	0	0	0	0	0	0	0	0
ADAM6	NR_002224.2_2	chr14	105969728	105972269	-	1843	0	0	0	0	0	0	0	0	0	0	0	0	0	0	0	0	0	0	0	0	0	0	0	0	0	0	0	0	0	0	0	0	0	0	0	0	0	0
ADAM7	NM_003817.4	chr8	24441025	24509565	+	3367	0	0	0	0	0	0.6332	0	0	0	0.0034	0	0	0.1679	1.4758	0	0.2402	0	0	0	0	0	0.4175	0	0.1001	0	0.0015	0	0	0.106	1.4652	0.0327	0.3411	0	0	0	0	0	0
ADAM8	NM_001109.5	chr10	133262422	133276868	-	3259	0.1866	0.1035	0	0.4367	0.0584	0.0357	0.0473	0.1676	0	0.0138	0	0.0937	7.4457	8.7775	8.5918	6.5298	0.2423	0.101	0.0655	0.2408	0.0697	0.0438	0.0204	0.0947	0.0162	0.0244	0.0438	0.0533	4.6652	8.7664	9.329	5.7601	0.551706	0.415125	0	0.269215	2.32783	0.989725
ADAM9	NM_003816.3_2	chr8	38996972	39105261	+	4112	25.5281	32.236	33.9899	17.5584	2.4907	3.1329	3.0925	1.702	0.5211	0.2995	0.5367	0.7549	0.9703	0.4401	0.3772	0.6988	34.4134	26.1983	37.4909	24.2447	3.7516	2.7023	4.1788	1.7973	0.5774	0.4549	0.644	0.6341	0.727	0.5305	1.3545	0.6021	1.26272	0.76126	1.33142	1.0894	0.68778	0.704493
ADAMDEC1	NM_014479.3	chr8	24384284	24406013	+	2348	0	0	0	0	0	0	0	0	0	0.016	0.0132	0	0	0	0	0	0	0	0	0	0	0	0	0	0	0.0078	0.0253	0	0	0	0	0	0	0	0	0	0	0
ADAMTS1	NM_006988.5	chr21	26835754	26845409	-	5183	0	0	0	0	0	0	0	0	0	0	0	0	0	0	0	0	0	0	0	0	0	0	0	0	0	0	0.0219	0	0	0	0	0	0	0	0	0	0	0
ADAMTS10	NM_030957.4	chr19	8580239	8610715	-	4251	6.3447	7.5864	7.5799	4.2367	0.4954	0.4832	0.4693	0.227	1.2127	1.5186	1.3703	1.15	0	0.1294	0.0771	0	3.9987	6.8464	5.9207	5.9407	0.3369	0.4962	0.3771	0.324	1.1352	1.1846	1.1569	0.9916	0.0908	0	0.1147	0.2408	1.19552	1.71173	1.19449	1.48029	0.667649	1.48529
ADAMTS12	NM_030955.4_2	chr5	33523534	33891990	-	8572	0	0	0	0	0	0	0	0	0.0015	0.0009	0.001	0.0014	0	0	0	0	0	0	0	0	0	0	0	0	0.0003	0.0012	0.0003	0	0	0	0	0	0	0	0	0	0	0
ADAMTS13	NM_139026.6_2	chr9	133422366	133459386	+	4306	0.5225	0.8026	0.3086	0.131	1.4673	1.3203	1.4302	0.5683	0.2586	0.1942	0.2347	0.1	n/a	n/a	n/a	n/a	0.3029	1.061	0.2621	0.1204	1.0068	1.2264	1.6845	1.2724	0.1559	0.1385	0.22	0.1556	n/a	n/a	n/a	n/a	1.53314	3.49128	0.589494	0.862455	0.250239	0.396183
ADAMTS14	NM_080722.4	chr10	70672505	70762441	+	5557	32.8058	33.5824	46.9547	32.4962	4.8936	5.1945	7.8889	4.9944	0.1352	0.1581	0.3862	0.5259	0.0559	0.0647	0.3887	0.4149	19.3272	27.4278	43.3461	33.7178	2.7282	3.6929	6.765	4.9531	0.1143	0.2151	0.3402	0.3544	0.0605	0.3284	0.3386	0.1806	1.02364	1.41906	1.43125	2.24264	0.990532	1.74449
ADAMTS15	NM_139055.4	chr11	130448644	130476645	+	6006	7.8002	4.8677	7.6142	4.7608	0.9354	0.3254	0.7736	0.3146	0	0.0105	0	0	0.0746	0	0	0	6.5434	5.3811	6.5325	6.9041	0.538	0.4204	0.6499	0.5	0	0.0051	0	0	0	0.0757	0	0.1806	0.623968	0.822245	0.976029	0.998182	0.610265	1.05496
ADAMTS16	NM_139056.4	chr5	5140329	5320304	+	4979	0	0	0	0	1.8918	1.4292	1.9765	2.8716	0.0797	0.1269	0.1142	0.1174	0	0	0	0	0	0	0	0	2.2101	1.3058	2.0755	2.5109	0.084	0.0895	0.0855	0.1012	0	0	0	0	0	0	0	0	0	0
ADAMTS17	NM_139057.4	chr15	99971436	100341975	-	6329	10.4874	11.4444	13.1249	9.0413	1.5789	1.7081	2.0834	1.3737	0.0444	0.0511	0.077	0.0349	0.1306	0.0388	0	0	11.36	12.1012	14.0044	14.0089	1.7305	1.8896	2.1758	2.0566	0.0615	0.0387	0.0634	0.033	0	0	0	0	1.09115	1.06515	1.25137	1.23267	0.862029	1.23307
ADAMTS18	NM_199355.4	chr16	77282127	77435034	-	5833	0	0	0	0	0	0	0	0	0	0.0021	0.0027	0	0	0	0	0	0	0	0	0	0	0.0161	0	0	0	0.0009	0	0	0	0	0	0	0	0	0	0	0	0
ADAMTS19	NM_133638.6	chr5	129460297	129738683	+	5201	0	0	0	0	0	0	0	0	0.0014	0.0008	0	0.0009	0	0	0	0	0	0	0	0	0	0	0	0	0	0.0004	0.0006	0.0006	0	0	0	0	0	0	0	0	0	0
ADAMTS19-AS1	NR_125748.1	chr5	129459558	129460689	-	786	0	0	0	0	0	0	0	0	0	0	0	0	0	0	0	0	0	0	0	0	0	0	0	0	0	0	0	0	0	0	0	0	0	0	0	0	0	0
ADAMTS2	NM_014244.5_2	chr5	179110852	179345461	-	6783	1.3435	1.3464	1.8178	1.3976	0.1475	0.1345	0.1369	0.1147	0.0056	0.0076	0.0072	0.004	0	0	0	0.08	1.0602	0.96	1.8497	1.5253	0.1562	0.1094	0.1534	0.1177	0.0121	0.0124	0.0099	0.0052	0	0	0	0	1.00141	0.904636	1.35203	1.74303	1.03949	1.43734
ADAMTS20	NM_025003.5	chr12	43353865	43552203	-	6358	0	0	0	0	0	0.0089	0	0	0.0055	0.0047	0.0034	0.0047	0	0	0	0	0	0	0	0	0	0	0.0075	0	0.0166	0.0038	0.007	0.005	0	0	0	0	0	0	0	0	0	0
ADAMTS3	NM_014243.3	chr4	72280968	72569221	-	6244	0	0	0	0	0	0	0	0	0.0009	0.0037	0.0005	0.0017	0	0.0647	0	0	0	0	0	0	0	0	0	0	0	0.0021	0.0004	0.0017	0	0	0.0291	0	0	0	0	0	0	0
ADAMTS4	NM_005099.6	chr1	161184301	161199054	-	9777	0.2612	0.9839	0.1371	0	0.0559	0.1916	0.0368	0	1.2488	0.8351	0.5376	0.6846	n/a	n/a	n/a	n/a	0.0908	0.5557	0.131	0	0.0337	0.1356	0.0557	0.0184	0.9073	0.6777	0.4305	0.4356	n/a	n/a	n/a	n/a	3.75248	6.05338	0.522883	1.42702	0	0
ADAMTS5	NM_007038.5	chr21	26917921	26967088	-	9621	0	0	0	0	0	0	0	0	0	0	0	0	0	0	0	0	0	0	0	0	0	0	0	0	0	0	0	0	0	0	0	0	0	0	0	0	0	0
ADAMTS6	NM_197941.4	chr5	65148737	65481920	-	7309	4.3293	4.2722	2.881	4.062	0.1623	0.2072	0.1295	0.1954	0.0022	0.0025	0.0014	0.003	0	0.0517	0	0	3.8169	4.2442	1.6822	4.4555	0.1914	0.143	0.0744	0.2356	0.0019	0.0022	0.0024	0.0014	0	0	0	0	0.986583	1.11166	0.665312	0.440609	0.938041	1.167
ADAMTS7	NM_014272.5	chr15	78759205	78811464	-	5520	14.4062	15.7166	15.7773	12.9723	1.2352	1.5104	1.014	1.2117	0.1812	0.1539	0.0847	0.1816	0.1119	0.0647	0.2343	0.1455	10.0877	13.6423	14.7691	15.5343	0.6473	1.2123	0.6936	1.361	0.0806	0.1699	0.0799	0.2313	0.0605	0.2273	0.1529	0.2007	1.09089	1.35224	1.0951	1.46392	0.900404	1.53977
ADAMTS7P1	NR_045529.3_2	chr15	82293282	82334561	+	4983	0	0	0	0.131	0	0	0	0	0.0077	0.0189	0.0042	0.0397	0.0746	0.2977	0.1943	0	0	0	0	0	0	0	0.0197	0	0.01	0.009	0.0189	0.0663	0.0454	0.1894	0.1492	0.1605	0	0	0	0	131	0
ADAMTS8	NM_007037.6	chr11	130404922	130428609	-	3628	0	0	0	0	0	0	0	0	0	0	0.0102	0	0	0	0	0	0	0	0	0	0	0	0	0	0	0	0	0	0	0	0	0	0	0	0	0	0	0
ADAMTS9	NM_182920.2	chr3	64515653	64688000	-	7624	0.2985	3.5213	0	0	0	0.2496	0	0.0257	0.0251	0.0455	0.0108	0.0155	0	0	0	0	0.1514	4.4463	0.131	0.2007	0.0536	0.4224	0	0.0236	0.0207	0.0584	0.0055	0.0232	0	0	0.0327	0	11.7573	29.1752	0	0.85958	0	1.31693
ADAMTS9-AS1	NR_110150.1	chr3	64561345	64590084	+	3930	0	0	0	0	0	0	0	0	0	0	0	0	n/a	n/a	n/a	n/a	0	0	0	0	0	0	0	0	0	0	0	0	n/a	n/a	n/a	n/a	0	0	0	0	0	0
ADAMTS9-AS2	NR_038264.1	chr3	64684869	65011468	+	2228	0	0	0	0	0	0	0	0	0.0123	0.0414	0.0052	0.007	0	0	0	0	0	0	0	0	0	0	0	0	0.0095	0.0502	0.004	0.0095	0	0	0	0	0	0	0	0	0	0
ADAMTSL1	NM_001040272.6	chr9	18474152	18910950	+	7771	0	0	0	0	0	0	0	0	0.0027	0.0015	0.0013	0.0021	0	0	0	0	0	0	0	0	0	0	0	0	0.0029	0.0019	0.0011	0.0005	0	0	0	0	0	0	0	0	0	0
ADAMTSL2	NM_001145320.2	chr9	133532163	133575519	+	4068	0	0	0	0	0	0	0	0	0.3476	0.3707	0.4098	0.3201	0	0	0	0	0	0	0	0	0	0	0	0	0.3192	0.2999	0.3745	0.3999	0	0	0	0	0	0	0	0	0	0
ADAMTSL3	NM_207517.3	chr15	83654122	84039842	+	7299	0	0	0	0	0.2227	0.2792	0.2187	0.2351	0.0384	0.051	0.0463	0.056	0	0	0	0	0	0	0	0	0.2273	0.1042	0.088	0.3613	0.0494	0.0476	0.0354	0.0504	0	0	0	0	0	0	0	0	0	0
ADAMTSL4	NM_001288607.2	chr1	150549407	150560933	+	4095	27.0583	29.7762	38.9289	24.7216	5.0283	5.4417	6.7622	3.0776	0.2602	0.0734	0.1503	0.4521	n/a	n/a	n/a	n/a	21.2963	24.1688	30.718	22.6792	4.206	4.2182	5.2243	3.277	0.2682	0.1167	0.2302	0.2617	n/a	n/a	n/a	n/a	1.10041	1.13483	1.43865	1.44234	0.913608	1.06489
ADAMTSL4-AS1	NR_104133.1	chr1	150560894	150574552	-	1036	3.0603	1.424	1.6463	3.1739	4.3035	4.2534	4.5235	6.3385	3.8253	3.0584	2.8217	4.1749	n/a	n/a	n/a	n/a	2.2417	2.8547	1.7259	3.0908	3.808	4.6732	4.3912	5.2887	4.3312	3.8864	3.6007	4.4212	n/a	n/a	n/a	n/a	0.465162	1.27289	0.537778	0.769563	1.03678	1.37816
ADAMTSL4-AS2	XR_001738229.1	chr1	150548563	150556700	-	544	0	0.1035	0	0	9.056	6.2598	8.748	7.2236	5.2052	5.6998	7.3956	4.7327	0.1306	0	0.12	0.2402	0.0908	0	0	0.1204	6.5579	5.8863	5.7832	7.5716	4.1621	4.6522	5.9561	4.2867	0.0454	0.1894	0.1092	0.3144	103.5	0	0	0	0	1.31155
ADAMTSL5	NM_001367197.1	chr19	1505021	1513019	-	2543	10.1888	14.0077	22.8771	15.2872	4.1424	5.0539	5.7624	4.5441	1.8667	2	3.209	2.9599	1.9967	2.0972	2.2808	1.7252	9.8756	14.5013	18.7673	19.5751	3.6614	5.4755	5.4147	5.7377	1.9068	2.6969	2.35	3.08	1.9387	2.4758	2.2721	3.4721	1.37468	1.46825	2.2451	1.90018	1.50025	1.98197
ADAP1	NM_001284308.1	chr7	897899	955407	-	2179	6.3447	7.7159	8.0944	5.7217	0.7687	0.345	0.3924	1.0252	1.3775	1.6156	1.5662	1.4421	0.5167	0.3883	0.277	0.6551	4.6046	6.2906	8.5643	6.9844	0.2206	0.5351	0.4878	0.9403	1.2389	1.5508	1.5687	1.5986	0.2097	0.583	0.5545	0.6021	1.21593	1.36586	1.27557	1.85954	0.901666	1.5165
ADAP2	NM_001346714.2	chr17	30921944	30959322	+	2666	8.4471	8.1561	14.4397	9.8275	2.1565	2.3477	3.7028	2.717	0.0701	0.0246	0.0439	0.0585	0.1306	0	0.0514	0.131	8.1792	11.7223	12.9339	16.4575	2.2628	3.2789	3.8441	4.5279	0.0497	0.0502	0.0704	0.0741	0	0.0505	0.131	0.301	0.965436	1.43301	1.70922	1.58112	1.16328	2.01187
ADAR	NM_001365045.1	chr1	154582056	154627997	-	6459	21.7586	21.8445	19.2072	20.9653	0.7928	0.7294	0.8123	1.3336	2.0142	1.8262	1.6098	1.7369	n/a	n/a	n/a	n/a	22.9624	18.3834	19.1387	19.749	0.9376	1.0265	0.8549	0.9553	1.9432	1.7496	1.7173	1.9014	n/a	n/a	n/a	n/a	1.0039	0.800552	0.8827	0.833444	0.963497	0.860021
ADARB1	NM_015834.4	chr21	45074579	45226560	+	3583	23.6371	22.604	29.2567	23.4112	2.5111	2.4944	4.687	3.1781	0.076	0.0299	0.0435	0.0757	0.1866	0.0906	0.1714	0.1965	20.1754	23.9246	24.8628	26.8137	2.1117	2.8834	3.1692	3.5758	0.0451	0.0678	0.0595	0.0733	0.3029	0.3536	0.2949	0.2609	0.956253	1.18577	1.23769	1.23227	0.990401	1.32896
ADARB2	NM_018702.4	chr10	1177312	1737525	-	8475	0	0	0	0	0	0	0	0	0.0036	0.0028	0.0022	0.0003	0	0	0	0	0	0	0	0	0	0	0	0	0.004	0.0013	0.0017	0.0014	0	0	0	0	0	0	0	0	0	0
ADARB2-AS1	NR_033387.2	chr10	1526629	1557008	+	668	0	0	0	0	0	0	0	0	0	0	0	0	n/a	n/a	n/a	n/a	0	0	0	0	0	0	0	0	0	0	0	0	n/a	n/a	n/a	n/a	0	0	0	0	0	0
ADAT1	NM_001324445.2	chr16	75596867	75623281	-	5757	18.0637	14.422	13.8909	13.147	3.7007	2.8876	2.7605	2.596	0.0454	0.0562	0.1288	0.2596	0.0559	0	0	0	16.005	13.4654	12.7373	15.561	3.1007	2.721	2.4805	3.194	0.1151	0.1862	0.1378	0.1147	0	0.0378	0.0436	0.0802	0.798353	0.841272	0.768953	0.795783	0.727773	0.972198
ADAT2	NM_182503.3	chr6	143422831	143450695	-	6244	35.8662	33.7895	32.0691	34.0686	2.352	2.4374	2.3212	3.1813	0.8716	0.4166	0.4582	0.6909	0.5598	0.4142	0.4458	1.6379	38.4727	34.2405	33.2524	35.6446	2.8671	2.9401	2.5728	2.6003	0.6675	0.5034	0.4617	0.5056	1.1965	1.1368	0.4988	1.5253	0.942072	0.889972	0.894107	0.864289	0.949854	0.926467
ADAT3	NM_138422.4	chr19	1905398	1913447	+	1599	34.8585	37.518	39.1347	30.0794	8.0108	7.8466	8.0917	5.2667	5.7705	6.1253	6.686	5.6932	n/a	n/a	n/a	n/a	40.1894	35.6974	45.7275	33.2228	8.4779	7.3496	10.0852	6.6039	6.7816	6.2696	7.7408	6.1792	n/a	n/a	n/a	n/a	1.07626	0.888207	1.12264	1.13777	0.862875	0.826635
ADCK1	NM_001366487.2	chr14	77800108	77935014	+	3439	32.358	35.369	42.736	35.2042	1.9983	2.0725	2.6434	2.5158	0.2748	0.3029	0.3659	0.2899	0	0.0517	0	0	28.6576	32.4552	41.7731	43.2311	2.2364	1.9471	3.1372	2.8006	0.2339	0.2842	0.3378	0.3693	0	0.0378	0.0327	0.0602	1.09302	1.13248	1.32068	1.45761	1.08793	1.50849
ADCK2	NM_052853.4	chr7	140672944	140695110	+	2574	20.3777	19.3934	25.3809	18.0389	10.2891	9.5107	12.3672	9.8397	0.02	0.0118	0.0289	0.0632	n/a	n/a	n/a	n/a	16.6311	19.7056	23.3917	21.2342	7.8244	9.4873	11.034	10.8154	0.0278	0.0397	0.0265	0.0399	n/a	n/a	n/a	n/a	0.95165	1.18479	1.24546	1.40642	0.885184	1.2767
ADCK5	NM_174922.5_2	chr8	144374046	144393242	+	1960	73.3373	80.7583	83.4828	63.4201	12.5295	13.5919	14.7104	11.2675	4.09	4.2524	4.3761	3.7357	n/a	n/a	n/a	n/a	55.3765	84.8267	86.1679	79.8659	10.5131	13.9308	14.5794	10.8299	2.9791	4.8756	4.7895	5.0147	n/a	n/a	n/a	n/a	1.10117	1.53179	1.13832	1.55601	0.864761	1.44221
ADCY1	NM_021116.4	chr7	45574367	45723116	+	12657	0	0	0	0	0.2791	0.1135	0.1463	0.3416	0.0024	0	0.0011	0.0048	0	0	0	1.3103	0	0	0	0	0.2908	0.3383	0.2252	0.39	0.003	0.0022	0	0	0	0.2273	0.1966	0	0	0	0	0	0	0
ADCY10	NM_018417.6	chr1	167809385	167914134	-	5342	0.1119	0.0776	0	0.9172	0.0314	0	0	0.0125	0.1458	0.1502	0.1795	0.1118	0	0	0	0	0.3332	0.96	0.5898	0.2809	0	0.0541	0	0	0.1473	0.1507	0.1426	0.1286	0	0	0	0.0602	0.687334	2.87253	0	1.76481	8.124	0.840515
ADCY10P1	NR_026938.2	chr6	41101033	41140835	+	4569	0.4851	0.1553	0.9946	1.1356	0.0891	0.0198	0.0954	0.048	0.0694	0.0238	0.0329	0.1134	0	0	0	0	1.1511	1.4652	1.0486	2.0471	0.0674	0.1162	0.0294	0.1452	0.1301	0.1071	0.1195	0.1737	0	0	0	0	0.319482	1.27176	2.04608	0.910164	2.33614	1.77684
ADCY2	NM_020546.3	chr5	7396137	7830081	+	6645	0	0.1553	0.0914	0	0	0	0	0.0295	0.0057	0.0026	0.0032	0.0049	0	0	0	0	0	0.1263	0.2621	0.2007	0	0.0342	0	0	0.0025	0.0027	0.0016	0.006	0	0	0	0	155.3	126.3	91.4	262.1	0	200.7
ADCY3	NM_001377128.1	chr2	24819168	24920237	-	5016	15.0033	19.1085	21.7796	14.4136	2.7639	2.247	3.0692	2.8506	0.3145	0.1506	0.1871	0.4556	n/a	n/a	n/a	n/a	10.7441	17.9371	20.9011	18.2638	1.8281	2.8142	2.791	3.3431	0.3092	0.3635	0.2563	0.4772	n/a	n/a	n/a	n/a	1.27353	1.66933	1.45156	1.94518	0.960631	1.69973
ADCY4	NM_001198568.2_2	chr14	24318358	24335071	-	3710	0	0.1553	0	0	0.181	0.1101	0.0995	0.2154	0.442	0.6451	0.6512	0.4235	2.2393	1.7477	1.2861	2.6206	0	0	0	0.1204	0.1979	0.218	0.139	0.4756	0.4141	0.7455	0.4163	0.471	0.6816	2.2737	0.8192	6.021	155.3	0	0	0	0	120.4
ADCY5	NM_001378259.1	chr3	123282295	123449090	-	6718	2.2766	4.0909	4.0815	2.0091	0.5553	0.9952	1.0273	0.4486	0.0284	0.0186	0.0144	0.0212	0.1119	0.0776	0.0514	0.0873	1.9387	3.3095	3.7578	2.8499	0.4609	0.8348	1.1126	0.7392	0.0339	0.0276	0.0229	0.0212	0.0454	0.0884	0.0327	0.1003	1.79615	1.70619	1.79202	1.93731	0.882113	1.46925
ADCY6	NM_015270.5	chr12	48766193	48789089	-	6092	16.8694	20.4808	18.3383	14.1952	0.9284	1.2426	1.3116	1.1349	0.2547	0.2428	0.2374	0.3431	n/a	n/a	n/a	n/a	13.7532	13.9707	13.9389	15.454	0.8621	0.7724	0.8581	1.1308	0.1335	0.3085	0.2973	0.3868	n/a	n/a	n/a	n/a	1.21401	1.01574	1.08701	1.01343	0.841426	1.12358
ADCY6-DT	NR_110020.2	chr12	48789575	48790535	+	473	20.9002	25.1156	23.0029	18.432	31.9255	33.4611	29.7589	22.2465	17.9627	21.0533	20.0266	17.0706	0	0.0517	0	0	17.5399	18.6192	16.6699	20.7926	24.2168	24.4228	21.551	22.815	15.738	18.6294	13.3206	21.175	0	0	0	0	1.20163	1.06147	1.10055	0.950345	0.881863	1.18538
ADCY7	NM_001114.5	chr16	50266550	50318135	+	6271	10.985	14.2753	12.6447	11.4726	0.8958	0.8055	1.1013	1.632	0.2165	0.1563	0.1532	0.3849	n/a	n/a	n/a	n/a	8.3206	13.9707	14.4632	10.9449	1.0308	1.4434	1.2446	1.4929	0.2728	0.3283	0.2757	0.3869	n/a	n/a	n/a	n/a	1.29941	1.67885	1.15098	1.73803	1.04429	1.31524
ADCY8	NM_001115.3	chr8	130780300	131040909	-	4421	0	0	0	0	0	0	0	0	0.0083	0.0142	0.0024	0.0097	0	0	0	0	0	0	0	0	0	0	0	0	0.0041	0.0092	0.0041	0.0058	0	0	0	0	0	0	0	0	0	0
ADCY9	NM_001116.4	chr16	3962652	4116442	-	7980	12.5774	16.5452	22.9457	11.9677	0.4717	0.4073	0.4454	0.3389	0.0657	0.0691	0.0377	0.0385	0.0746	0.1424	0.2229	0	13.1473	17.4066	20.8647	14.2096	0.4728	0.39	0.369	0.4051	0.1056	0.0575	0.0552	0.0483	0	0.1263	0.0546	0	1.31537	1.32387	1.82421	1.58687	0.951449	1.08072
ADCYAP1	NM_001099733.2	chr18	904870	912172	+	3259	0	0	0	0	0	0	0	0	0	0	0	0	0	0	0	0	0	0	0	0	0	0	0	0	0	0	0	0	0	0	0	0	0	0	0	0	0	0
ADCYAP1R1	NM_001199636.2	chr7	31052307	31111474	+	6720	0	0	0	0	0	0	0	0	0.0074	0.0273	0.0078	0.0099	0	0	0	0	0	0	0	0	0	0	0	0	0.0164	0.0411	0.0143	0.0264	0	0	0	0	0	0	0	0	0	0
ADD1	NM_001286645.2	chr4	2844149	2930062	+	4743	15.9737	26.3843	27.9533	17.1508	1.1693	0.7519	0.8291	1.5321	0.0778	0.033	0.05	0.0994	0.6997	0	0.643	1.9655	15.4496	24.4046	23.683	24.0039	0.8626	1.0839	1.0747	1.5576	0.0854	0.0883	0.0971	0.1527	0.568	1.9895	1.8024	3.0105	1.65163	1.57952	1.74985	1.53282	1.07362	1.55359
ADD2	NM_017488.4	chr2	70656783	70768200	-	9376	0	0	0	0	0	0.0217	0.0164	0	0.0674	0.0505	0.0524	0.0635	0	0	0	0	0	0	0	0	0.0087	0	0	0	0.0437	0.075	0.0544	0.0837	0	0	0	0	0	0	0	0	0	0
ADD3	NM_001320594.2	chr10	110007983	110135565	+	4467	27.6181	23.9763	28.2277	22.0136	3.8182	3.6802	4.187	2.2953	0.1231	0.0699	0.1	0.1196	0.0559	0.2459	0.0514	0.0655	17.9943	17.9539	25.1031	23.9236	2.5723	2.38	3.1677	3.0575	0.1015	0.0867	0.1	0.1106	0	0.2526	0.0327	0.2007	0.868106	0.997699	1.02204	1.39498	0.797043	1.32944
ADD3-AS1	NR_038943.1	chr10	109945558	110008381	-	1280	25.0056	23.7692	27.1644	17.6895	9.0801	9.2824	9.7276	4.8907	0.4972	0.3748	0.447	0.4594	0	0	0	0	16.8734	17.2718	22.8965	20.03	5.2948	4.7504	7.4883	6.7459	0.3418	0.3285	0.4314	0.4336	0	0.0378	0	0	0.950517	1.02355	1.08629	1.35688	0.707393	1.18701
ADGB	NM_024694.4	chr6	146598971	146815462	+	5318	0	0	0	0	0	0.0081	0	0	0.1037	0.1209	0.1254	0.0815	0	0	0	0	0	0	0	0	0	0	0	0	0.1075	0.1363	0.158	0.1074	0	0	0	0	0	0	0	0	0	0
ADGRA1	NM_001083909.3	chr10	133087923	133131675	+	4264	0	0	0	0	0	0	0	0	0.0198	0.0285	0.056	0.0215	0	0	0	0	0	0	0	0	0	0	0	0	0.031	0.0124	0.0365	0.0426	0	0	0	0	0	0	0	0	0	0
ADGRA1-AS1	NR_111905.1	chr10	133085243	133086697	-	475	0	0	0	0	0	0	0	0	0	0	0	0	0	0	0	0	0	0	0	0	0	0	0	0	0	0	0	0	0	0	0	0	0	0	0	0	0	0
ADGRA2	NM_032777.10	chr8	37796882	37844896	+	6944	9.1811	10.5899	14.0624	7.2505	2.0177	1.6138	2.0738	4.015	0.3292	0.548	0.2864	0.3908	n/a	n/a	n/a	n/a	8.4518	11.7728	13.7641	10.7843	2.0709	2.565	2.2752	3.6348	0.3265	0.5024	0.3652	0.5017	n/a	n/a	n/a	n/a	1.15332	1.39277	1.5315	1.62835	0.789634	1.27583
ADGRA3	NM_145290.4	chr4	22387375	22516066	-	4577	48.369	58.7412	45.0569	37.0242	7.1298	9.6654	7.5865	5.2712	0.2769	0.2618	0.1822	0.3548	0.0559	0.0906	0	0	43.5014	49.8282	53.7165	38.2537	6.5195	8.1009	9.5815	6.3343	0.3161	0.3656	0.2749	0.3196	0.2272	0.0378	0.0983	0.301	1.21441	1.14541	0.931505	1.23479	0.765437	0.879347
ADGRB1	NM_001702.3	chr8	142449648	142545007	+	6020	0	0	0	0	0.1279	0.2764	0.4244	0.2467	0.5256	0.6599	0.6603	0.3549	0.4105	0.712	0.3258	0.2402	0	0	0	0	0.1913	0.4745	0.4676	0.3595	0.5608	0.5555	0.7192	0.4381	0.4392	0.7958	0.9066	0.3411	0	0	0	0	0	0
ADGRB2	NM_001364857.2	chr1	31727116	31764340	-	5708	6.5561	10.2792	10.6668	6.3332	1.7147	1.638	2.0361	1.172	0.1489	0.0885	0.1408	0.1527	0.1306	0	0	0.1528	4.9681	8.859	7.6613	8.1351	1.3655	1.5827	1.4535	1.4919	0.1235	0.1989	0.172	0.1872	0.106	0.0378	0.1092	0.1404	1.56764	1.78282	1.62676	1.54179	0.965854	1.63714
ADGRB3	NM_001704.3	chr6	68635281	69389506	+	6090	0	0	0	0	0	0	0	0	0.0038	0.0027	0.0027	0.0023	0	0	0	0	0	0	0	0	0	0	0	0	0.0031	0.0031	0.0023	0.0032	0	0	0	0	0	0	0	0	0	0
ADGRD1	NM_001330497.2	chr12	130953906	131141469	+	5486	0	0	0	0	0.1473	0.3061	0.1937	0.218	0.029	0.0447	0.015	0.0139	0	0	0	0	0	0	0	0	0.2001	0.3426	0.3811	0.1508	0.0304	0.0541	0.027	0.027	0	0	0	0	0	0	0	0	0	0
ADGRD1-AS1	NR_131950.1	chr12	130990625	130993976	-	789	0	0	0.1028	0	0	0	0.1486	0	0	0	0	0	n/a	n/a	n/a	n/a	0	0	0	0	0	0	0	0	0	0	0	0	n/a	n/a	n/a	n/a	0	0	102.8	0	0	0
ADGRD2	XM_006717348.3	chr9	124451086	124477795	+	3644	0	0.0776	0.2057	0	2.4646	3.0034	3.0936	1.9597	0.1599	0.1805	0.2339	0.1316	0.8397	1.6312	0.7374	0.4367	0.2726	0.2526	0.3058	0	2.3942	2.9837	3.6587	2.7243	0.0985	0.1507	0.2133	0.1308	0.6058	1.7937	1.5293	0.6021	77.6	0.923246	205.7	1.11769	0	0
ADGRE1	NM_001974.5	chr19	6887578	6940450	+	3112	0	0	0	0	0.0496	0.0373	0.0266	0.0242	0.0295	0.0359	0.0055	0.0182	0.1119	0.0388	0.0857	0	0	0	0	0	0.0403	0.0618	0.0761	0.0356	0.0248	0.0265	0.0123	0.0243	0.0605	0.0884	0	0	0	0	0	0	0	0
ADGRE2	NM_013447.4	chr19	14732391	14778560	-	6791	0.1866	0.0776	0	0.131	5.653	5.2263	6.7232	4.5108	0.4813	0.3846	0.3652	0.5244	n/a	n/a	n/a	n/a	0.1817	0	0	0.1605	5.3054	5.5903	6.5243	3.8701	0.4897	0.4582	0.3542	0.4544	n/a	n/a	n/a	n/a	0.413646	0	0	0	0.698294	0.878489
ADGRE3	NM_032571.5	chr19	14619116	14674844	-	2349	0	0	0	0	0	0	0	0	0.052	0.0322	0.0446	0.063	n/a	n/a	n/a	n/a	0	0	0	0	0	0	0	0	0.0417	0.0407	0.027	0.0165	n/a	n/a	n/a	n/a	0	0	0	0	0	0
ADGRE4P	NR_024075.1	chr19	6952499	6990846	-	2732	0	0	0	0	0.2868	0.2701	0	0	0.0047	0.0119	0.0043	0	0	0	0	0	0	0	0	0	0.5202	0.1941	0.0959	0	0.0149	0.0212	0.0027	0.0067	0	0	0	0	0	0	0	0	0	0
ADGRE5	NM_001784.5	chr19	14381143	14408725	+	3213	44.9354	52.7773	53.2657	37.4318	20.6244	22.8052	23.5872	17.2651	0.7001	0.463	0.5441	0.9431	n/a	n/a	n/a	n/a	57.4567	54.1735	56.7316	48.7838	25.8684	25.1768	26.1484	22.589	0.5987	0.6144	0.5151	0.7822	n/a	n/a	n/a	n/a	1.17449	0.942841	1.18536	0.987363	0.832995	0.849039
ADGRF1	NM_153840.4	chr6	46997707	47042332	-	5432	4.1427	17.391	6.1394	7.1194	0.3986	2.0936	0.5156	1.1226	0.1414	0.9777	0.252	0.367	0.0746	0.479	0.0514	0.131	3.1202	13.8444	4.7409	7.1048	0.2186	2.4642	0.5239	0.9507	0.071	1.0776	0.1312	0.3026	0	0.7831	0	0.2007	4.19697	4.4356	1.48162	1.51894	1.71813	2.2763
ADGRF2	NM_153839.7	chr6	47656471	47697794	+	5241	1.978	1.0356	1.3719	5.2413	0.3334	0.1141	0.239	1.0321	0.0062	0.0053	0.0083	0.03	n/a	n/a	n/a	n/a	1.3632	2.5684	1.1142	7.3055	0.2178	0.4356	0.1887	1.305	0.002	0.002	0.0014	0.0075	n/a	n/a	n/a	n/a	0.523295	1.88272	0.693229	0.816742	2.64846	5.35515
ADGRF3	NM_001145169.1	chr2	26308172	26319102	-	4396	0	0	0	0	0	0	0	0	0	0	0	0	0	0	0	0	0	0	0	0	0	0	0	0	0	0	0	0	0	0	0	0	0	0	0	0	0	0
ADGRF4	NM_153838.5	chr6	47698579	47722014	+	3128	0.1119	0.3624	0	0.3057	0.0504	0.1271	0	0.1415	0.0115	0.0374	0.0152	0.0007	0	0	0	0	0.5755	0.48	0	0.8429	0.1528	0.22	0	0.3349	0.0279	0.0351	0.008	0.0225	0	0	0	0	3.20992	0.832611	0	0	2.70771	1.4621
ADGRF5	NM_001098518.2	chr6	46852521	46921938	-	5761	0	0	0	0	0	0	0	0	0.0149	0.0585	0.0234	0.0401	0	0	0	0	0	0	0	0	0	0	0	0	0.0035	0.0255	0.0314	0.0454	0	0	0	0	0	0	0	0	0	0
ADGRF5-AS1	NR_110658.1	chr6	46903470	46910029	+	1732	0.4478	0.699	0.3772	0.4367	0.0387	0.047	0	0	0	0	0	0	n/a	n/a	n/a	n/a	0.1514	0.48	0.6991	0.6422	0	0.0196	0.0283	0.0417	0	0	0.0475	0	n/a	n/a	n/a	n/a	1.55749	3.14961	0.840463	4.58727	0.973039	4.21391
ADGRG1	NM_001145772.3	chr16	57628629	57665567	+	4401	0.6717	1.2428	1.5434	0.5241	0.2339	0.3263	0.3477	0.1123	0.0395	0.0429	0.0395	0.0583	n/a	n/a	n/a	n/a	1.6661	1.0358	1.3327	1.0035	0.5192	0.3669	0.358	0.2886	0.0852	0.0791	0.0778	0.1287	n/a	n/a	n/a	n/a	1.84748	0.621318	2.29434	0.799412	0.779099	0.601943
ADGRG2	NM_001079858.3	chrX	18989306	19122468	-	4684	0	0	0	0	0	0	0	0.0559	0.003	0.0018	0.0028	0.003	0	0	0	0	0	0	0	0	0.0579	0	0	0.0385	0.0077	0.0053	0.0048	0.0051	0	0	0	0	0	0	0	0	0	0
ADGRG3	NM_170776.5	chr16	57668305	57689378	+	2609	0	0	0	0	0	0	0	0	0.0363	0.0126	0.0083	0	0	0	0	0.0655	0	0.0757	0.0655	0	0	0.0413	0	0	0.0541	0.0184	0.0562	0.0391	0	0	0	0	0	75.7	0	65.5	0	0
ADGRG4	NM_153834.4	chrX	136300962	136416890	+	9933	0	0	0	0	0	0.0003	0	0	0.0279	0.0489	0.0228	0.0055	0	0	0	0	0	0	0	0	0	0.0001	0	0	0.0167	0.0378	0.0086	0.0051	0	0	0	0	0	0	0	0	0	0
ADGRG5	NM_153837.4	chr16	57542642	57577189	+	3807	0.1866	0.2071	0.1028	0.6551	0	0.1938	0.0794	0.1409	0	0.0193	0.0085	0.0251	0	0.0388	0	0.1747	0	0.101	0.3277	0	0.0596	0.0654	0.046	0	0.0133	0.0535	0.0145	0	0	0.0884	0.0655	0	1.10394	101	0.547974	327.7	3.492	0
ADGRG6	NM_020455.6	chr6	142302006	142446261	+	6868	46.6522	56.4454	48.2581	42.9352	1.4189	1.4723	1.4865	1.1658	0.5363	0.6928	0.4	0.491	0.1119	0	0	0.0655	50.1054	49.8198	42.4722	49.0113	1.2536	1.4177	1.3427	1.2632	0.8919	0.6161	0.3391	0.4342	0.3938	0.1515	0.0436	0	1.20989	0.99428	1.0344	0.84764	0.920306	0.978145
ADGRG7	NM_032787.3	chr3	100609600	100695479	+	3128	0	0	0	0	0	0	0	0	0.0121	0.014	0.0055	0.0118	0	0	0	0	0	0	0	0	0	0	0	0	0.0115	0.0178	0.0071	0.0065	0	0	0	0	0	0	0	0	0	0
ADGRL1	NM_001008701.3	chr19	14147742	14206169	-	7835	12.9879	14.75	15.057	13.7585	1.159	0.5104	0.4846	1.3529	0.1741	0.1291	0.0785	0.2031	n/a	n/a	n/a	n/a	8.6033	14.9223	13.1669	14.2899	0.8733	0.8641	0.5259	1.338	0.1676	0.2455	0.1716	0.2618	n/a	n/a	n/a	n/a	1.13558	1.73428	1.15922	1.53027	1.05925	1.66079
ADGRL1-AS1	NR_045214.1	chr19	14137151	14171264	+	2888	113.558	116.024	124.47	87.9233	2.779	3.1286	3.3455	2.3291	2.4129	2.0311	2.2383	2.2286	n/a	n/a	n/a	n/a	117.529	127.581	115.4	107.415	2.7711	2.9724	3.5857	2.6842	2.295	2.0529	2.0596	2.3614	n/a	n/a	n/a	n/a	1.02171	1.08552	1.09608	0.981882	0.774254	0.913943
ADGRL2	NM_001366004.1	chr1	81306258	81993932	+	7989	0	0	0	0	0	0	0	0.0246	0.0065	0.0107	0.0101	0.0086	0	0	0	0	0	0	0	0	0	0	0	0	0.006	0.0084	0.0061	0.0122	0	0	0	0	0	0	0	0	0	0
ADGRL3	NM_001387552.1	chr4	61200325	62078335	+	13738	0	0	0	0	0.0203	0.0254	0.0187	0.0286	0.0012	0.0007	0.0013	0.0027	n/a	n/a	n/a	n/a	0	0	0	0	0.0231	0.0331	0.0262	0.0569	0.001	0.0011	0.0008	0.002	n/a	n/a	n/a	n/a	0	0	0	0	0	0
ADGRL3-AS1	NR_110595.1	chr4	62071754	62161765	-	467	0	0	0	0	0	0	0	0	0.0031	0	0	0	n/a	n/a	n/a	n/a	0	0	0	0	0	0	0	0	0	0	0	0	n/a	n/a	n/a	n/a	0	0	0	0	0	0
ADGRL4	NM_022159.4	chr1	78889763	79006730	-	3539	0	0	0	0	0	0	0	0	0	0	0	0	0	0	0	0	0	0	0	0	0	0	0	0	0	0	0	0	0	0	0	0	0	0	0	0	0	0
ADGRV1	NM_032119.4	chr5	90558796	91164437	+	19557	21.149	19.7041	18.727	12.6228	0.8545	0.9111	0.7004	0.5158	0.0298	0.033	0.0272	0.0276	0	0	0	0	22.2657	17.3055	17.0194	16.3371	0.8917	0.721	0.6667	0.526	0.0318	0.0315	0.0206	0.0261	0	0	0	0	0.931636	0.777192	0.885437	0.764343	0.596823	0.733701
ADH1A	NM_000667.4	chr4	99276368	99290985	-	1454	0	0	0	0	0	0	0	0	0	0	0	0	0	0	0	0	0	0	0	0	0	0	0	0	0	0	0	0	0	0	0	0	0	0	0	0	0	0
ADH1B	NM_000668.6	chr4	99304970	99321401	-	4067	0	0	0	0	0	0	0	0	0	0.0094	0	0	0	0	0	0	0	0	0	0	0	0	0	0	0	0	0	0	0	0	0	0	0	0	0	0	0	0
ADH1C	NM_000669.5	chr4	99336496	99352746	-	1454	0	0	0	0	0	0	0	0	0.01	0	0	0	0	0	0	0	0	0	0	0	0	0	0	0	0.0081	0	0	0	0	0	0	0	0	0	0	0	0	0
ADH4	NM_001306171.2	chr4	99123657	99144297	-	2150	0	0	0	0	0	0	0	0	0	0	0	0	0	0	0	0	0	0	0	0	0	0	0	0	0.0073	0	0.0053	0	0	0	0	0	0	0	0	0	0	0
ADH5	NM_000671.4	chr4	99070977	99088788	-	2652	78.1394	82.0961	78.8182	64.8906	4.6793	4.0623	3.2236	3.171	2.4239	2.1568	1.8428	2.1161	1.2689	0.5696	1.0746	2.708	83.3071	70.738	73.5617	69.5632	4.5074	3.1738	3.2216	2.316	2.6449	2.1614	2.1091	1.8364	1.5449	1.941	1.5839	2.1274	1.05062	0.849113	1.00867	0.883008	0.830436	0.835011
ADH6	NM_001102470.2	chr4	99202638	99219246	-	2802	0	0	0	0	0	0	0	0	0	0	0	0	0	0	0	0	0	0	0	0	0	0	0	0	0	0	0	0	0	0	0	0	0	0	0	0	0	0
ADH7	NM_001166504.2	chr4	99412262	99435134	-	2100	0	0	0	0	0	0	0	0	0	0	0	0	0	0	0	0	0	0	0	0	0	0	0	0	0	0	0	0	0	0	0	0	0	0	0	0	0	0
ADHFE1	NM_144650.3	chr8	66432503	66468907	+	1972	3.7695	1.191	2.1265	5.5907	0.2043	0.0425	0.0751	0.1435	0.2154	0.0764	0.1105	0.3053	0	0.0647	0.0685	0	2.1811	2.7284	2.4906	5.459	0	0.0691	0	0.1319	0.1742	0.1789	0.1427	0.3418	0	0	0	0	0.315873	1.25036	0.563984	1.14138	1.48275	2.50172
ADI1	NM_018269.4_2	chr2	3497365	3519531	-	2181	75.3029	103.544	96.8249	62.2408	8.3809	9.6369	7.6744	8.8623	2.7417	4.2345	4.6101	2.6659	0.2052	0.0776	0.0514	0.1528	73.2194	88.4478	91.5862	70.5801	8.0971	10.0493	9.7992	8.1078	2.7757	3.4649	3.803	3.0513	0	0.2778	0.1092	0.0602	1.37501	1.20797	1.28579	1.25083	0.826528	0.96394
ADIG	NM_001018082.3	chr20	38581196	38588463	+	770	1.0823	0.7767	1.5777	3.4068	0.0087	0.1866	0.024	0.3454	0.1206	0.0077	0.2375	0.2954	0	0	0	0.0582	1.757	2.1221	1.5511	2.4485	0.3056	0.3149	0.2281	0.5974	0.2085	0.2454	0.2421	0.3202	0	0	0	0	0.716976	1.20711	1.45638	0.882309	3.14484	1.39278
ADIPOQ	NM_001177800.2	chr3	186842709	186858463	+	4593	0	0	0	0	0	0	0	0	0	0	0	0	n/a	n/a	n/a	n/a	0	0	0	0	0	0	0	0	0	0	0	0	n/a	n/a	n/a	n/a	0	0	0	0	0	0
ADIPOQ-AS1	NR_046662.2	chr3	186851885	186861368	-	3572	0	0.233	0.1371	0	0	0	0	0	0	0.0591	0.0348	0	n/a	n/a	n/a	n/a	2.2114	0.1515	0.0655	0	0	0	0	0	0.5611	0.0384	0.0166	0	n/a	n/a	n/a	n/a	233	0.0684777	137.1	0.0296059	0	0
ADIPOR1	NM_001290557.1	chr1	202940824	202958396	-	2249	16.9814	20.7139	22.8085	18.2136	8.1208	10.6862	11.9734	7.2607	0.3479	0.138	0.194	0.6047	0.7464	0.3624	0.8917	1.7252	17.3884	19.9582	19.816	23.1609	8.1893	10.0878	10.1815	9.7209	0.2706	0.313	0.3386	0.6534	1.2723	0.8589	0.71	1.5654	1.21973	1.14772	1.34307	1.13954	1.0725	1.3319
ADIPOR2	NM_001375364.1_2	chr12	1691069	1788674	+	4155	46.8637	52.6392	47.1948	42.9789	3.619	3.9682	3.7171	3.199	0.2434	0.0937	0.1274	0.3796	1.3809	0.4531	0.7431	1.3758	47.6113	45.6765	46.9874	46.8571	4.0207	3.8852	4.6818	4.5159	0.2502	0.2345	0.221	0.3255	1.1814	1.3642	1.136	1.1439	1.12322	0.959342	1.00704	0.986875	0.917085	0.984139
ADIRF	NM_006829.3	chr10	86968481	86970915	+	627	90.157	158.142	118.502	95.2612	120.229	223.949	164.021	134.532	17.7164	16.953	18.7521	21.0661	n/a	n/a	n/a	n/a	108.39	213.57	159.227	104.525	162.623	313.396	230.8	163.291	14.4815	19.8972	20.5825	17.3434	n/a	n/a	n/a	n/a	1.75405	1.97036	1.31438	1.469	1.0566	0.964335
ADIRF-AS1	NR_170180.1	chr10	86965286	86971240	-	2135	36.3141	31.3039	38.4487	33.064	10.3039	9.7882	12.5388	11.5665	50.02	77.5978	62.2071	48.7022	1.2375	1.022	1.4892	3.2068	29.3847	36.9606	40.9647	31.5904	9.1157	10.8492	10.7486	9.5197	54.0131	98.3159	76.6884	51.5377	1.3871	1.8748	2.156	2.4084	0.862008	1.25778	1.05875	1.39404	0.910475	1.07503
ADK	NM_001123.4	chr10	74176762	74709290	+	1993	69.12	58.206	50.1445	52.2823	11.9544	9.7094	8.0819	6.9648	0.0835	0.0646	0.0545	0.1483	0.0559	0.0517	0	0	64.7877	61.6094	55.3187	55.8753	12.9399	10.8262	10.0206	8.0397	0.1283	0.0976	0.0623	0.1317	0.212	0.1642	0.0655	0.1404	0.842089	0.950928	0.72546	0.853833	0.756388	0.862424
ADM	NM_001124.3	chr11	10305072	10307397	+	1492	289.219	277.109	250.094	205.897	82.7716	77.37	69	64.9805	9.6756	7.0175	10.1919	19.3915	20.7136	22.1379	28.2963	19.655	325.756	355.476	314.646	265.02	93.3013	105.475	87.275	85.7109	7.5791	9.6198	10.5074	22.2562	17.0401	30.1268	24.9065	33.7178	0.958124	1.09123	0.864718	0.965889	0.711904	0.81355
ADM2	NM_001369882.1	chr22	50481542	50486437	+	4286	7.427	11.5738	6.8597	3.7562	1.9847	2.8123	1.7413	1.145	1.3559	4.658	2.6585	0.4625	n/a	n/a	n/a	n/a	13.5714	8.6654	10.4869	5.6597	4.0586	2.5297	2.4985	1.2519	5.129	4.0241	5.5609	2.7425	n/a	n/a	n/a	n/a	1.55813	0.638457	0.923492	0.772664	0.505681	0.417001
ADM5	NM_001101340.2	chr19	49689593	49690575	+	788	2.9857	1.8642	1.3376	1.8781	2.7302	2.3007	1.8744	2.0644	2.7991	1.099	1.4691	1.4184	n/a	n/a	n/a	n/a	1.757	2.4253	1.0486	2.0872	1.4889	2.3093	1.436	3.0815	0.6253	3.0706	0.6757	0.062	n/a	n/a	n/a	n/a	0.624167	1.37958	0.447852	0.596473	0.628821	1.18726
ADNP	NM_001282532.2	chr20	50888917	50909791	-	6093	0.2239	0.1035	0.1371	1.1356	1.5435	0.9008	0.8034	1.935	0.4178	0.1497	0.1867	0.5835	2.5503	1.2169	1.269	3.7999	0.3938	0.3284	0.3058	0.7225	1.5248	1.7226	1.3744	2.0044	0.4863	0.4657	0.4389	0.6867	2.59	2.7916	2.3704	3.4319	0.460205	0.831814	0.609604	0.774569	5.04936	1.83004
ADNP-AS1	NR_110008.1	chr20	50930983	50945134	+	927	23.9606	33.6342	28.6393	22.5814	8.4004	12.5829	12.3885	7.3036	4.1197	4.887	4.8552	4.0877	n/a	n/a	n/a	n/a	24.3256	28.6236	31.6575	22.7461	9.3699	10.5547	13.9359	7.2837	4.1477	4.6075	5.2835	3.9719	n/a	n/a	n/a	n/a	1.40367	1.17664	1.19522	1.30135	0.9424	0.93503
ADNP2	NM_014913.4	chr18	80109261	80140346	+	5157	19.8925	24.054	23.2887	15.8113	1.5305	1.5563	1.9337	2.4406	0.5708	0.54	0.586	0.7875	1.3249	0.3624	0.4973	0.9827	21.0842	24.733	29.3999	19.187	1.7814	2.0893	2.6807	2.2496	0.5927	0.7648	0.8132	0.8157	0.8027	1.5284	0.9248	1.5654	1.20914	1.173	1.17067	1.39434	0.794797	0.909975
ADO	NM_032804.6	chr10	62804719	62808479	+	3760	36.4634	52.3026	51.2649	33.5008	14.8367	21.0335	20.5811	14.4035	0	0	0	0	0.4665	0.1035	0.6688	2.031	35.8675	44.9186	49.5509	42.5487	14.4393	18.2969	19.9613	18.3747	0	0	0	0	0.9996	0.96	0.9831	1.1841	1.43435	1.25231	1.40589	1.38146	0.918726	1.18624
ADORA1	NM_000674.3	chr1	203127725	203167405	+	2901	12.8013	12.9979	14.4054	11.8803	5.5728	5.9693	6.3957	5.4122	0.119	0.0946	0.1372	0.0923	0	0	0	0	8.2398	11.4191	12.1911	11.3195	3.5854	5.5535	5.2507	4.9608	0.0785	0.0717	0.1216	0.0945	0	0	0	0	1.01528	1.38568	1.12522	1.47936	0.927982	1.37359
ADORA2A	NM_000675.6	chr22	24427598	24442357	+	2529	0	0	0	0	0	0.046	0	0	0	0.0222	0	0.0428	n/a	n/a	n/a	n/a	0	0	0	0	0.0539	0	0.0388	0.1349	0.0222	0.0185	0.0107	0.0541	n/a	n/a	n/a	n/a	0	0	0	0	0	0
ADORA2A-AS1	NR_028484.3	chr22	24429205	24495074	-	2831	0	0	0	0	0	0.0548	0	0.0925	0.063	0.1115	0.0881	0.133	n/a	n/a	n/a	n/a	0	0	0	0	0	0	0	0.0893	0.1059	0.1009	0.0556	0.1398	n/a	n/a	n/a	n/a	0	0	0	0	0	0
ADORA2B	NM_000676.4	chr17	15945129	15975746	+	1522	43.4799	49.6616	50.2474	33.8502	25.1745	27.4529	27.9028	19.6188	3.2433	3.0321	3.9644	3.9338	0.3199	0	1.2494	0.2807	49.338	45.0955	59.0911	38.9628	30.2565	24.1362	34.9793	20.1936	3.2651	3.4858	3.76	3.4427	0.7789	0.5954	0.1872	0.258	1.14215	0.913993	1.15562	1.19765	0.778507	0.789696
ADORA3	NM_001302678.2	chr1	111499428	111503633	-	1821	0	0	0	0	0	0	0	0	0	0	0	0	n/a	n/a	n/a	n/a	0	0	0	0	0	0	0	0	0	0	0	0	n/a	n/a	n/a	n/a	0	0	0	0	0	0
ADPGK	NM_001365225.1	chr15	72751293	72783758	-	2608	54.3405	58.206	54.0889	48.3949	9.2938	10.5014	9.7348	10.9479	0.3299	0.1689	0.1733	0.4225	0.4292	0.1683	0.1886	0.8298	58.8906	61.1547	58.5741	66.6731	8.7939	11.3241	11.8522	14.5728	0.2838	0.3601	0.2795	0.4486	0.4645	0.7705	0.426	0.883	1.07112	1.03843	0.995352	0.994609	0.89057	1.13213
ADPGK-AS1	NR_040107.1	chr15	72782834	72798199	+	2730	4.2173	4.1168	3.224	4.7172	31.2724	32.9914	30.6049	27.3826	1.307	1.3094	1.3477	0.9281	0	0	0	0	3.8472	3.8148	3.9544	5.6196	33.2063	34.3927	32.6397	36.9423	1.158	1.2686	1.6236	1.4772	0	0	0	0	0.975938	0.991321	0.764289	1.0276	1.11827	1.46032
ADPRH	NM_001371092.1	chr3	119579491	119589945	+	3689	22.7663	25.9441	23.1515	16.5538	4.3761	4.7588	5.5585	3.8516	2.3157	2.7056	1.7305	1.2995	0	0	0	0	23.4774	26.173	26.414	20.6321	4.99	5.8248	6.2643	5.1537	2.3047	2.3358	2.0987	1.1861	0	0	0	0	1.13953	1.11477	1.01688	1.12503	0.727087	0.878769
ADPRHL1	NM_138430.5	chr13	113421944	113453488	-	1993	1.3062	0.7767	0	2.1402	0.0842	0.1465	0	0.1314	2.3055	2.0205	2.4089	2.469	0	0	0	0	0.5755	1.1873	0.8739	2.4084	0.0911	0.1526	0.1032	0.3845	1.8677	2.0021	1.9685	2.3157	0	0	0	0	0.594171	2.0595	0	1.51587	1.63724	4.17762
ADPRM	NM_020233.5	chr17	10697593	10711558	+	1534	61.2824	75.295	71.0209	56.2133	16.7356	19.8593	14.735	13.5257	1.5758	1.7682	1.4534	1.7422	n/a	n/a	n/a	n/a	56.0733	62.3421	68.1653	57.8422	15.5036	15.9229	14.4828	11.3928	1.5679	1.5936	1.3111	1.4925	n/a	n/a	n/a	n/a	1.22864	1.11178	1.15889	1.21562	0.917268	1.03153
ADPRS	NM_017825.3	chr1	36088891	36093932	+	1651	23.3634	41.1171	33.887	20.9216	15.8491	28.688	24.2727	14.6128	1.2758	0.8874	0.9486	2.714	0.7464	0.1941	0.7288	0.3275	26.1433	38.7796	39.8067	30.4665	17.8439	27.7526	28.4636	21.9106	0.7909	1.0955	0.9323	1.9155	0.1136	0.8526	0.9285	1.3547	1.75982	1.48329	1.45037	1.52258	0.895448	1.16532
ADRA1A	NM_033302.3	chr8	26753814	26865655	-	4920	0	0	0	0	0	0	0	0	0.0015	0.0021	0	0.0034	0	0	0	0	0	0	0	0	0	0	0	0	0	0.0024	0.0009	0	0	0	0	0	0	0	0	0	0	0
ADRA1B	NM_000679.4	chr5	159916481	159973012	+	2507	0	0	0	0	0	0	0	0	0.0666	0.0313	0.0466	0.0497	0	0	0	0	0.0908	0	0	0	0.0103	0	0	0	0.0757	0.046	0.0414	0.0479	0	0	0	0	0	0	0	0	0	0
ADRA1D	NM_000678.4	chr20	4220629	4249287	-	2942	0.3732	0.233	0	0.131	1.8077	4.3036	3.4625	0.1336	0.2242	0.1872	0.072	0.1324	0.5598	0.945	0.3258	0.4367	0.4241	0.2273	0.0655	0.2809	2.1623	3.7998	3.9321	0.4093	0.2102	0.134	0.0624	0.1217	0.2877	0.581	0.3058	0.4415	0.622662	0.534698	0	0.154081	0.35008	0.660786
ADRA2A	NM_000681.4	chr10	111077028	111080907	+	3879	0	0	0	0	0	0	0	0.0506	0	0	0	0	0	0	0	0	0	0	0	0	0	0	0	0	0	0	0	0	0	0	0	0	0	0	0	0	0	0
ADRA2B	NM_000682.7	chr2	96112875	96116571	-	3696	7.1657	10.7194	16.1203	11.0504	0.6457	0.7046	1.0107	1.1302	0	0	0	0	0	0	0.0857	0.0655	6.2404	8.918	15.3153	13.8885	0.5062	0.6964	0.7554	1.6996	0	0	0	0	0.0605	0.0378	0	0	1.49572	1.42885	2.24933	2.45382	1.54191	2.22522
ADRA2C	NM_000683.4	chr4	3766384	3768526	+	2142	39.2501	47.3917	47.7893	37.0242	5.7634	4.5061	3.4221	6.0115	0	0	0	0	0.3172	0.1165	0.3772	0.4076	34.474	42.3586	47.1331	42.9501	3.7642	4.9479	2.9656	6.509	0	0	0	0	0.2726	0.4379	0.4041	0.9834	1.2074	1.22868	1.21753	1.36717	0.943265	1.24583
ADRB1	NM_000684.3	chr10	114043865	114046904	+	3039	14.1822	14.3443	16.2918	12.0113	1.7868	1.7527	1.7657	1.5101	0	0	0	0	0	0	0	0	10.7844	11.4191	11.3244	15.5343	1.1348	1.6017	1.3343	2.0922	0	0	0	0	0	0	0	0.1806	1.01136	1.05876	1.14867	1.04997	0.846868	1.44031
ADRB2	NM_000024.6	chr5	148826610	148828623	+	2013	13.7344	8.648	12.4503	11.1378	3.5792	2.431	4.1863	1.9625	0	0	0	0	0	0	0	0	11.3297	7.9075	9.5912	11.2392	4.1241	2.8802	3.1111	2.0189	0	0	0	0	0	0	0	0	0.629614	0.697883	0.906439	0.846479	0.810883	0.991925
ADRB3	NM_000025.3	chr8	37962989	37966599	-	2585	0	0	0	0	0	0	0	0	0	0	0	0	0	0	0	0	0	0	0	0	0	0	0	0	0	0	0	0	0	0	0	0	0	0	0	0	0	0
ADRM1	NM_001281438.1	chr20	62302895	62308862	+	1363	36.8366	42.7224	45.377	33.4135	17.063	19.0543	18.3072	14.1747	6.3046	5.0185	5.7861	6.6747	n/a	n/a	n/a	n/a	33.2218	36.0511	44.2637	35.3235	15.0546	16.0094	18.6782	14.1152	5.2476	5.5838	6.3494	6.8996	n/a	n/a	n/a	n/a	1.15975	1.08513	1.23181	1.33233	0.907049	1.06323
ADSL	NM_001363840.3	chr22	40346499	40387527	+	1799	77.169	97.5625	103.799	68.2246	11.7233	13.0894	17.4404	11.2754	1.6279	1.2748	1.3511	1.7349	n/a	n/a	n/a	n/a	76.8041	89.0794	110.594	84.2813	13.8717	12.983	17.9973	13.107	1.3766	1.4435	1.5071	1.9232	n/a	n/a	n/a	n/a	1.26425	1.15981	1.34507	1.43993	0.884082	1.09734
ADSS1	NM_001320424.1	chr14	104729843	104747325	+	1857	0	0.1553	0	0.131	0	0	0	0	0.6556	0.1963	0.1975	0.0377	0.4416	0.2071	0.2229	0.5241	0.1211	0.1768	0.1092	0.4014	0	0.0612	0	0	0.4304	0.2352	0.1719	0.0308	0.3332	0.5179	0.2949	0.3411	155.3	1.44799	0	0.894349	131	3.28747
ADSS2	NM_001126.5	chr1	244408493	244451909	-	2555	40.1209	45.6137	40.1636	32.7583	13.0502	15.747	16.011	13.6577	0.6495	0.4927	0.4315	0.5122	0.2425	0.0388	0.3258	0.4149	39.1392	38.1227	38.9547	34.6411	12.9761	12.9901	13.7118	14.0355	0.6298	0.6227	0.5601	0.5277	0.3029	0.2526	0.2949	0.582	1.13688	0.974004	1.00104	0.995261	0.816469	0.885052
ADTRP	NM_001143948.2	chr6	11713522	11778803	-	1746	0	0	0	0	0	0	0	0	0.2819	0.3001	0.2437	0.1247	0	0	0	0	0	0	0	0	0	0	0	0	0.3726	0.1896	0.2243	0.1781	0	0	0	0	0	0	0	0	0	0
AEBP1	NM_001129.5	chr7	44104344	44114560	+	4097	0.2612	0.1035	0	0	1.3716	0.4062	0.497	1.3698	0.7558	0.2865	0.3314	0.7852	n/a	n/a	n/a	n/a	0.1615	0.0673	0	0	0.9965	1.3474	0.8348	2.1308	0.6338	0.5283	0.3943	0.8738	n/a	n/a	n/a	n/a	0.394737	0.414154	0	0	0	0
AEBP2	NM_001114176.2	chr12	19439491	19522227	+	5269	25.9013	34.5836	30.0112	26.2503	7.3086	9.8591	8.2066	7.5573	0.2033	0.1078	0.1218	0.2692	0.1306	0.0906	0.12	0.5896	27.4358	32.5816	32.2838	31.0686	7.9126	9.3735	9.3395	8.8486	0.2207	0.2026	0.1528	0.2045	0.318	0.6189	0.1857	0.3411	1.33516	1.18751	1.15863	1.17666	1.01344	1.13237
AEN	NM_022767.4	chr15	88621339	88632281	+	3072	31.6489	32.7279	32.1149	33.5882	5.4366	5.6083	5.0702	6.4456	2.3471	2.4211	3.1192	5.6023	0.4091	0.0746	0.2572	0.7307	27.3853	37.2637	39.9597	36.8622	5.4228	7.3803	8.0002	7.3234	2.7092	3.9864	3.8157	6.138	0.5592	0.3789	0.3025	0.5094	1.03406	1.36067	1.01469	1.45911	1.06124	1.34601
AFAP1	NM_001134647.2	chr4	7758713	7939861	-	7704	16.0483	20.0666	22.6027	15.7676	1.9431	2.3118	2.5973	2.1042	0.1401	0.1709	0.2101	0.2477	n/a	n/a	n/a	n/a	12.4506	19.1498	17.937	16.8589	1.5511	2.3568	2.2082	2.2999	0.1803	0.2135	0.2206	0.2102	n/a	n/a	n/a	n/a	1.25031	1.53794	1.40833	1.44054	0.982448	1.35395
AFAP1-AS1	NR_026892.1	chr4	7754089	7778928	+	6795	0	0.1035	0	0.131	0	0.0171	0.0454	0.2603	0.0651	0.0516	0.037	0.1997	n/a	n/a	n/a	n/a	0	0.1263	0.0655	0	0.0668	0.1115	0.0675	0.062	0.0604	0.2436	0.069	0.2235	n/a	n/a	n/a	n/a	103.5	126.3	0	65.5	131	0
AFAP1L1	NM_152406.4	chr5	149271858	149343637	+	6024	15.078	10.8489	12.6904	5.6344	0.7023	0.4701	0.7406	0.4451	0.5274	0.4912	0.4438	0.2769	0.5038	0	0.2057	0.1965	12.2385	9.9285	13.7423	7.0647	0.5067	0.5503	0.7381	0.5059	0.4444	0.4471	0.3771	0.3028	0.1363	0.1515	0.1638	0.5418	0.719471	0.811185	0.841594	1.12278	0.373659	0.577205
AFAP1L2	NM_001287824.2	chr10	114294823	114404502	-	3881	2.1273	2.2267	1.6463	0.5678	0.494	0.4111	0.3551	0.1642	0.0682	0.1079	0.06	0.0521	n/a	n/a	n/a	n/a	1.454	1.541	1.136	0.9232	0.2896	0.269	0.1235	0.2395	0.0457	0.0868	0.0501	0.0533	n/a	n/a	n/a	n/a	1.04623	1.05911	0.773528	0.780756	0.266786	0.634502
AFDN	NM_001366319.2	chr6	167826563	167972023	+	8126	6.8298	10.2016	11.6272	10.7447	0.9877	1.5438	1.7719	1.7815	0.0943	0.0517	0.0576	0.2243	0.3358	0.1424	0.4458	0.9754	6.3919	8.3033	9.8096	14.4505	1.0719	1.4065	1.7452	2.3415	0.1021	0.11	0.1216	0.2116	0.6513	0.6947	0.7319	1.5855	1.49347	1.29883	1.70217	1.53445	1.57298	2.2604
AFDN-DT	NR_027906.1	chr6	167823889	167826796	-	2311	6.27	9.4248	11.3528	10.3079	1.4331	2.0046	2.9662	3.25	0	0	0	0	0	0	0	0	5.9981	7.7727	9.5475	13.8082	0.8675	2.0241	1.7431	3.5881	0	0	0.1649	0	0.0454	0	0.0327	0	1.50292	1.29564	1.81037	1.59149	1.64374	2.30171
AFF1	NM_001166693.3	chr4	86935010	87141039	+	9261	19.9671	24.7531	30.2856	20.5722	1.5023	1.6596	2.2513	1.7166	0.6644	0.572	0.6339	0.6349	0.0559	0.22	0.0857	0.1747	19.6302	25.0362	26.0644	28.339	1.6015	1.8127	2.1493	2.2578	0.6627	0.5747	0.6463	0.6832	0.106	0.1389	0.2476	0.0802	1.23963	1.27533	1.5167	1.3277	1.03025	1.44357
AFF1-AS1	NR_038841.1	chr4	86924893	86934850	-	1945	18.9221	23.8209	28.9137	19.6113	4.1666	5.7808	6.6218	5.0695	0.3265	0.2423	0.2964	0.3434	0.0746	0.1165	0.0514	0	19.0243	24.1014	25.0813	26.6531	4.5019	5.845	4.406	6.052	0.1548	0.1986	0.2072	0.1277	0	0.1389	0	0.0602	1.25883	1.26681	1.52796	1.31831	1.03637	1.40093
AFF2	NM_002025.4	chrX	148500616	149000663	+	13748	0	0.1294	0	0	0.0149	0.0438	0	0.0238	0.0014	0.0004	0.0006	0.003	0	0	0	0	0	0.2526	0.1893	0	0	0.0231	0.0173	0.0262	0.0005	0.0009	0.0007	0.0009	0	0	0	0	129.4	252.6	0	189.3	0	0
AFF3	NM_001025108.2	chr2	99545418	100105583	-	9955	0.1119	0	0	0	0	0.0526	0.0372	0.0236	0.0041	0.0051	0.0025	0.004	0.0497	0	0	0	0	0	0	0	0	0.0479	0.0592	0	0.018	0.0069	0.0022	0.0059	0	0	0.0436	0	0	0	0	0	0	0
AFF4	NM_014423.4	chr5	132875394	132963634	-	9536	48.3317	58.8275	64.1612	43.7651	2.8132	3.3993	3.5543	2.8959	0.2763	0.1412	0.1324	0.3004	2.3792	1.1166	1.9292	4.0947	49.7722	54.2577	63.9486	53.8683	3.02	3.266	3.5323	3.4213	0.2727	0.2432	0.2218	0.3386	3.3512	2.1316	1.8843	3.6878	1.21714	1.0901	1.32749	1.2848	0.905497	1.08228
AFG1L	NM_145315.5	chr6	108295053	108526001	+	5048	32.3828	30.9155	35.5676	32.7146	1.7861	1.586	1.5774	1.5331	0.0747	0.0604	0.0634	0.0802	0.0746	0.0647	0	0	26.739	28.6741	30.2083	28.2186	1.382	1.5786	1.5723	1.739	0.0544	0.0519	0.0579	0.0604	0	0	0.0327	0	0.954659	1.07233	1.09831	1.1297	1.01021	1.0553
AFG3L1P	NR_003228.1	chr16	89972579	90000787	+	1941	81.3491	100.229	89.5193	73.1602	23.4592	32.9457	29.818	20.7854	2.4782	2.2317	2.2385	2.9418	0.5038	0.1553	0.4287	0.6988	90.8502	97.5679	110.266	81.0032	29.3545	32.32	39.3514	26.6778	2.3612	2.5717	2.5402	2.888	0.5452	0.6442	0.6991	1.445	1.23207	1.07393	1.10042	1.2137	0.899325	0.891603
AFG3L2	NM_006796.3	chr18	12328943	12377227	-	3160	41.1535	47.4262	55.9981	37.0678	9.1074	12.1966	13.6912	8.4405	0.437	0.204	0.2142	0.6307	n/a	n/a	n/a	n/a	39.1089	42.1059	54.27	39.1769	9.2488	10.0582	13.3575	9.2064	0.3775	0.3529	0.3377	0.5906	n/a	n/a	n/a	n/a	1.15239	1.0766	1.36068	1.38763	0.900699	1.00171
AFM	NM_001133.2	chr4	73481744	73504001	+	1997	0	0	0	0	0	0	0	0	0	0	0	0	0	0	0	0	0	0	0	0	0	0	0	0	0	0	0	0	0	0	0	0	0	0	0	0	0	0
AFMID	NM_001010982.4	chr17	78187316	78207701	+	1730	235.774	232.281	184.446	165.189	28.0528	39.6955	29.0317	25.3076	10.4485	8.9471	6.7234	6.626	0.2239	0.2848	0.1371	0.262	241.732	271.853	231.558	183.869	36.7236	64.5021	54.092	40.8718	9.5567	7.1321	5.6089	5.8411	0.3332	0.4294	0.2512	0.2609	0.985178	1.1246	0.782297	0.957908	0.700622	0.76063
AFP	NM_001354717.2	chr4	73436220	73456174	+	2284	0	0	0	0	0	0	0	0	0	0	0	0	0	0	0	0	0	0	0	0	0	0	0	0	0	0	0	0	0	0	0	0	0	0	0	0	0	0
AFTPH	NM_203437.4	chr2	64524327	64593005	+	4098	27.0583	25.3054	28.5364	24.6342	0.7849	0.9831	0.7752	0.7315	0.0751	0.0647	0.081	0.1656	0.765	0.2589	0.7545	0.9609	25.1436	20.2361	21.7386	27.6165	0.8055	0.6826	0.7945	1.0875	0.1181	0.0975	0.1075	0.1087	1.1208	1.3516	1.136	1.3848	0.935183	0.804789	1.05459	0.864543	0.910378	1.09831
[truncated: 22,977 more rows]
